# Supplementary material for: Analysis of networks of host proteins in the early time points following HIV transduction
Source: BMC Bioinformatics. 2019 Jul 17;20:398. doi: 10.1186/s12859-019-2990-3 (PMC6637640; doi:10.1186/s12859-019-2990-3)
Supplement: Supplementary file 1 — List of identified proteins. (XLSX 1147 kb) [file 12859_2019_2990_MOESM1_ESM.xlsx]

## Sheet: Protein_identification_data
Biological sample name	Protein name	Protein accession numbers	Protein molecular weight (Da)	Protein identification probability	Exclusive unique peptide count	Exclusive unique spectrum count	Total spectrum count	Percentage of total spectra	Percentage sequence coverage	Peptide sequence	Previous amino acid	Next amino acid	Best Peptide identification probability	Best SEQUEST XCorr score	Best SEQUEST DCn score	Calculated +1H Peptide Mass (AMU)
EC_212270_T33Vspike_1_A	14-3-3 protein beta/alpha OS=Bos taurus GN=YWHAB PE=1 SV=2	1433B_BOVIN,1433B_CHICK,1433B_HUMAN,1433B_MOUSE,1433B_RAT,1433B_SHEEP	28 082,1	1	3	4	6	0.000258	0.187	AKLAEQAERYDDMAAAMK	K	A	0.848	2.2	0.29	2 011,9577
EC_212270_T33Vspike_1_A	14-3-3 protein beta/alpha OS=Bos taurus GN=YWHAB PE=1 SV=2	1433B_BOVIN,1433B_CHICK,1433B_HUMAN,1433B_MOUSE,1433B_RAT,1433B_SHEEP	28 082,1	1	3	4	6	0.000258	0.187	AVTEQGHELSNEERNLLSVAYK	K	N	0.986	3.35	0.458	2 487,2474
EC_212270_T33Vspike_1_A	14-3-3 protein beta/alpha OS=Bos taurus GN=YWHAB PE=1 SV=2	1433B_BOVIN,1433B_CHICK,1433B_HUMAN,1433B_MOUSE,1433B_RAT,1433B_SHEEP	28 082,1	1	3	4	6	0.000258	0.187	LAEQAERYDDMAAAMK	K	A	0.997	3.35	0.514	1 812,8256
EC_212270_T33Vspike_1_A	14-3-3 protein beta/alpha OS=Bos taurus GN=YWHAB PE=1 SV=2	1433B_BOVIN,1433B_CHICK,1433B_HUMAN,1433B_MOUSE,1433B_RAT,1433B_SHEEP	28 082,1	1	3	4	6	0.000258	0.187	NLLSVAYKNVVGAR	R	R	0.842	2.81	0.164	1 503,8641
EC_212270_T33Vspike_2_A	14-3-3 protein theta OS=Bos taurus GN=YWHAQ PE=2 SV=1	1433T_BOVIN,1433T_CHICK,1433T_MOUSE	27 765,4	1	3	4	5	0.000209	0.155	AVTEQGAELSNEER	K	N	0.861	2.2	0.31	1 532,7187
EC_212270_T33Vspike_2_A	14-3-3 protein theta OS=Bos taurus GN=YWHAQ PE=2 SV=1	1433T_BOVIN,1433T_CHICK,1433T_MOUSE	27 765,4	1	3	4	5	0.000209	0.155	AVTEQGAELSNEERNLLSVAYK	K	N	0.954	2.85	0.436	2 421,2256
EC_212270_T33Vspike_2_A	14-3-3 protein theta OS=Bos taurus GN=YWHAQ PE=2 SV=1	1433T_BOVIN,1433T_CHICK,1433T_MOUSE	27 765,4	1	3	4	5	0.000209	0.155	LAEQAERYDDMATCMK	K	A	0.968	2.43	0.418	1 947,8247
EC_212270_T33Vspike_2_B	14-3-3 protein theta OS=Bos taurus GN=YWHAQ PE=2 SV=1	1433T_BOVIN,1433T_CHICK,1433T_MOUSE	27 765,4	0.998	2	5	6	0.000261	0.155	AVTEQGAELSNEERNLLSVAYK	K	N	0.873	2.41	0.285	2 421,2256
EC_212270_T33Vspike_2_B	14-3-3 protein theta OS=Bos taurus GN=YWHAQ PE=2 SV=1	1433T_BOVIN,1433T_CHICK,1433T_MOUSE	27 765,4	0.998	2	5	6	0.000261	0.155	LAEQAERYDDMATCMK	K	A	0.968	2.67	0.388	1 931,8298
EC_212270_T33Vspike_7_A	14-3-3 protein theta OS=Bos taurus GN=YWHAQ PE=2 SV=1	1433T_BOVIN,1433T_CHICK,1433T_MOUSE	27 765,4	0.999	2	3	3	0.000136	0.155	AVTEQGAELSNEERNLLSVAYK	K	N	0.659	2.33	0.226	2 421,2256
EC_212270_T33Vspike_7_A	14-3-3 protein theta OS=Bos taurus GN=YWHAQ PE=2 SV=1	1433T_BOVIN,1433T_CHICK,1433T_MOUSE	27 765,4	0.999	2	3	3	0.000136	0.155	LAEQAERYDDMATCMK	K	A	0.995	3.02	0.439	1 874,8083
EC_212270_T33Vspike_1_A	14-3-3 protein zeta/delta OS=Bos taurus GN=YWHAZ PE=1 SV=1	1433Z_BOVIN,1433Z_MOUSE,1433Z_SHEEP	27 745,9	1	1	2	4	0.000172	0.18	LAEQAERYDDMAACMK	K	S	0.997	4.82	0.585	1 901,8192
EC_212270_T33Vspike_1_A	14-3-3 protein zeta/delta OS=Bos taurus GN=YWHAZ PE=1 SV=1	1433Z_BOVIN,1433Z_MOUSE,1433Z_SHEEP	27 745,9	1	1	2	4	0.000172	0.18	NLLSVAYKNVVGAR	R	R	0.842	2.81	0.164	1 503,8641
EC_212270_T33Vspike_1_A	14-3-3 protein zeta/delta OS=Bos taurus GN=YWHAZ PE=1 SV=1	1433Z_BOVIN,1433Z_MOUSE,1433Z_SHEEP	27 745,9	1	1	2	4	0.000172	0.18	SVTEQGAELSNEER	K	N	0.978	2.15	0.411	1 548,7136
EC_212270_T33Vspike_1_B	14-3-3 protein zeta/delta OS=Bos taurus GN=YWHAZ PE=1 SV=1	1433Z_BOVIN,1433Z_MOUSE,1433Z_SHEEP	27 745,9	1	2	3	6	0.000273	0.188	AKLAEQAERYDDMAACMK	K	S	0.965	2.85	0.364	2 100,9513
EC_212270_T33Vspike_1_B	14-3-3 protein zeta/delta OS=Bos taurus GN=YWHAZ PE=1 SV=1	1433Z_BOVIN,1433Z_MOUSE,1433Z_SHEEP	27 745,9	1	2	3	6	0.000273	0.188	LAEQAERYDDMAACMK	K	S	0.997	4.29	0.587	1 901,8192
EC_212270_T33Vspike_1_B	14-3-3 protein zeta/delta OS=Bos taurus GN=YWHAZ PE=1 SV=1	1433Z_BOVIN,1433Z_MOUSE,1433Z_SHEEP	27 745,9	1	2	3	6	0.000273	0.188	SVTEQGAELSNEERNLLSVAYKNVVGAR	K	R	0.929	3.63	0.24	3 033,5599
EC_212270_T33Vspike_2_A	14-3-3 protein zeta/delta OS=Bos taurus GN=YWHAZ PE=1 SV=1	1433Z_BOVIN,1433Z_MOUSE,1433Z_SHEEP	27 745,9	1	3	3	4	0.000167	0.155	LAEQAERYDDMAACMK	K	S	0.997	3.25	0.473	1 901,8192
EC_212270_T33Vspike_2_A	14-3-3 protein zeta/delta OS=Bos taurus GN=YWHAZ PE=1 SV=1	1433Z_BOVIN,1433Z_MOUSE,1433Z_SHEEP	27 745,9	1	3	3	4	0.000167	0.155	SVTEQGAELSNEER	K	N	0.979	2.71	0.377	1 548,7136
EC_212270_T33Vspike_2_A	14-3-3 protein zeta/delta OS=Bos taurus GN=YWHAZ PE=1 SV=1	1433Z_BOVIN,1433Z_MOUSE,1433Z_SHEEP	27 745,9	1	3	3	4	0.000167	0.155	SVTEQGAELSNEERNLLSVAYK	K	N	0.881	2.53	0.231	2 437,2205
EC_212270_T33Vspike_3_A	14-3-3 protein zeta/delta OS=Bos taurus GN=YWHAZ PE=1 SV=1	1433Z_BOVIN,1433Z_MOUSE,1433Z_SHEEP	27 745,9	0.999	2	3	3	0.000151	0.18	LAEQAERYDDMAACMK	K	S	0.763	2	0.318	1 901,8192
EC_212270_T33Vspike_3_A	14-3-3 protein zeta/delta OS=Bos taurus GN=YWHAZ PE=1 SV=1	1433Z_BOVIN,1433Z_MOUSE,1433Z_SHEEP	27 745,9	0.999	2	3	3	0.000151	0.18	SVTEQGAELSNEERNLLSVAYKNVVGAR	K	R	0.997	3.99	0.331	3 033,5599
EC_212270_T33Vspike_3_B	14-3-3 protein zeta/delta OS=Bos taurus GN=YWHAZ PE=1 SV=1	1433Z_BOVIN,1433Z_MOUSE,1433Z_SHEEP	27 745,9	0.999	3	5	6	0.000315	0.188	AKLAEQAERYDDMAACMK	K	S	0.571	1.88	0.26	2 100,9513
EC_212270_T33Vspike_3_B	14-3-3 protein zeta/delta OS=Bos taurus GN=YWHAZ PE=1 SV=1	1433Z_BOVIN,1433Z_MOUSE,1433Z_SHEEP	27 745,9	0.999	3	5	6	0.000315	0.188	LAEQAERYDDMAACMK	K	S	0.997	3.85	0.635	1 901,8192
EC_212270_T33Vspike_3_B	14-3-3 protein zeta/delta OS=Bos taurus GN=YWHAZ PE=1 SV=1	1433Z_BOVIN,1433Z_MOUSE,1433Z_SHEEP	27 745,9	0.999	3	5	6	0.000315	0.188	SVTEQGAELSNEERNLLSVAYKNVVGAR	K	R	0.38	2.3	0	3 033,5599
EC_212270_T33Vspike_4_A	14-3-3 protein zeta/delta OS=Bos taurus GN=YWHAZ PE=1 SV=1	1433Z_BOVIN,1433Z_MOUSE,1433Z_SHEEP	27 745,9	1	3	4	5	0.000201	0.155	LAEQAERYDDMAACMK	K	S	0.997	3.78	0.606	1 901,8192
EC_212270_T33Vspike_4_A	14-3-3 protein zeta/delta OS=Bos taurus GN=YWHAZ PE=1 SV=1	1433Z_BOVIN,1433Z_MOUSE,1433Z_SHEEP	27 745,9	1	3	4	5	0.000201	0.155	SVTEQGAELSNEER	K	N	0.992	2.96	0.299	1 548,7136
EC_212270_T33Vspike_4_A	14-3-3 protein zeta/delta OS=Bos taurus GN=YWHAZ PE=1 SV=1	1433Z_BOVIN,1433Z_MOUSE,1433Z_SHEEP	27 745,9	1	3	4	5	0.000201	0.155	SVTEQGAELSNEERNLLSVAYK	K	N	0.903	2.39	0.307	2 437,2205
EC_212270_T33Vspike_4_B	14-3-3 protein zeta/delta OS=Bos taurus GN=YWHAZ PE=1 SV=1	1433Z_BOVIN,1433Z_MOUSE,1433Z_SHEEP	27 745,9	1	3	4	6	0.000238	0.18	LAEQAERYDDMAACMK	K	S	0.994	2.94	0.506	1 901,8192
EC_212270_T33Vspike_4_B	14-3-3 protein zeta/delta OS=Bos taurus GN=YWHAZ PE=1 SV=1	1433Z_BOVIN,1433Z_MOUSE,1433Z_SHEEP	27 745,9	1	3	4	6	0.000238	0.18	SVTEQGAELSNEER	K	N	0.917	2.05	0.356	1 548,7136
EC_212270_T33Vspike_4_B	14-3-3 protein zeta/delta OS=Bos taurus GN=YWHAZ PE=1 SV=1	1433Z_BOVIN,1433Z_MOUSE,1433Z_SHEEP	27 745,9	1	3	4	6	0.000238	0.18	SVTEQGAELSNEERNLLSVAYKNVVGAR	K	R	0.997	4.4	0.319	3 033,5599
EC_212270_T33Vspike_7_A	14-3-3 protein zeta/delta OS=Bos taurus GN=YWHAZ PE=1 SV=1	1433Z_BOVIN,1433Z_MOUSE,1433Z_SHEEP	27 745,9	1	2	3	3	0.000136	0.18	LAEQAERYDDMAACMK	K	S	0.988	3.19	0.594	1 901,8192
EC_212270_T33Vspike_7_A	14-3-3 protein zeta/delta OS=Bos taurus GN=YWHAZ PE=1 SV=1	1433Z_BOVIN,1433Z_MOUSE,1433Z_SHEEP	27 745,9	1	2	3	3	0.000136	0.18	SVTEQGAELSNEERNLLSVAYKNVVGAR	K	R	0.997	3.78	0.363	3 033,5599
EC_212270_T33Vspike_7_B	14-3-3 protein zeta/delta OS=Bos taurus GN=YWHAZ PE=1 SV=1	1433Z_BOVIN,1433Z_MOUSE,1433Z_SHEEP	27 745,9	1	2	3	3	0.000136	0.18	LAEQAERYDDMAACMK	K	S	0.997	3.21	0.583	1 901,8192
EC_212270_T33Vspike_7_B	14-3-3 protein zeta/delta OS=Bos taurus GN=YWHAZ PE=1 SV=1	1433Z_BOVIN,1433Z_MOUSE,1433Z_SHEEP	27 745,9	1	2	3	3	0.000136	0.18	SVTEQGAELSNEERNLLSVAYKNVVGAR	K	R	0.98	3.1	0.29	3 033,5599
EC_212270_T33Vspike_9_B	14-3-3 protein zeta/delta OS=Bos taurus GN=YWHAZ PE=1 SV=1	1433Z_BOVIN,1433Z_MOUSE,1433Z_SHEEP	27 745,9	1	3	3	4	0.000206	0.188	AKLAEQAERYDDMAACMK	K	S	0.988	2.74	0.345	2 100,9513
EC_212270_T33Vspike_9_B	14-3-3 protein zeta/delta OS=Bos taurus GN=YWHAZ PE=1 SV=1	1433Z_BOVIN,1433Z_MOUSE,1433Z_SHEEP	27 745,9	1	3	3	4	0.000206	0.188	LAEQAERYDDMAACMK	K	S	0.997	3.41	0.539	1 901,8192
EC_212270_T33Vspike_9_B	14-3-3 protein zeta/delta OS=Bos taurus GN=YWHAZ PE=1 SV=1	1433Z_BOVIN,1433Z_MOUSE,1433Z_SHEEP	27 745,9	1	3	3	4	0.000206	0.188	SVTEQGAELSNEERNLLSVAYKNVVGAR	K	R	0.975	2.93	0.294	3 033,5599
EC_212270_T33Vspike_2_A	Aspartate aminotransferase, cytoplasmic OS=Homo sapiens GN=GOT1 PE=1 SV=3	AATC_HUMAN,AATC_MACFA,AATC_PANTR,AATC_PONAB	46 393,6	0.997	2	2	2	8.35e-05	0.0847	IANDNSLNHEYLPILGLAEFR	K	S	0.982	3	0.308	2 399,2355
EC_212270_T33Vspike_2_A	Aspartate aminotransferase, cytoplasmic OS=Homo sapiens GN=GOT1 PE=1 SV=3	AATC_HUMAN,AATC_MACFA,AATC_PANTR,AATC_PONAB	46 393,6	0.997	2	2	2	8.35e-05	0.0847	LALGDDSPALKEKR	R	V	0.807	2.32	0.261	1 512,8383
EC_212270_T33Vspike_12_A	Actin, clone 205 OS=Artemia sp. PE=2 SV=1	ACT1_ARTSX,ACT1_BACDO,ACT1_DIPDE,ACT1_DROME,ACT1_HELER,ACT1_LUMTE,ACT1_PODCA,ACT1_SCHCO,ACT1_SCHMA,ACT1_STRFN,ACT2_ARTSX,ACT2_BACDO,ACT2_BOMMO,ACT2_DIPDE,ACT2_DROME,ACT2_LUMTE,ACT2_LYTPI,ACT2_MOLOC,ACT2_SACKO,ACT2_SCHMA,ACT2_STRFN,ACT2_SUIBO,ACT2_XENLA,ACT2_XENTR,ACT3A_HELAM,ACT3_BACDO,ACT3_BOMMO,ACT3_DROME,ACT3_LIMPO,ACT3_PODCA,ACT3_XENLA,ACT3_XENTR,ACT4_ARTSX,ACT5_BACDO,ACT5_CHICK,ACT5_DIPDE,AC…	41 786,8	1	5	6	8	0.0004	0.16	AGFAGDDAPR	K	A	0.997	3.09	0.249	976.448
EC_212270_T33Vspike_12_A	Actin, clone 205 OS=Artemia sp. PE=2 SV=1	ACT1_ARTSX,ACT1_BACDO,ACT1_DIPDE,ACT1_DROME,ACT1_HELER,ACT1_LUMTE,ACT1_PODCA,ACT1_SCHCO,ACT1_SCHMA,ACT1_STRFN,ACT2_ARTSX,ACT2_BACDO,ACT2_BOMMO,ACT2_DIPDE,ACT2_DROME,ACT2_LUMTE,ACT2_LYTPI,ACT2_MOLOC,ACT2_SACKO,ACT2_SCHMA,ACT2_STRFN,ACT2_SUIBO,ACT2_XENLA,ACT2_XENTR,ACT3A_HELAM,ACT3_BACDO,ACT3_BOMMO,ACT3_DROME,ACT3_LIMPO,ACT3_PODCA,ACT3_XENLA,ACT3_XENTR,ACT4_ARTSX,ACT5_BACDO,ACT5_CHICK,ACT5_DIPDE,AC…	41 786,8	1	5	6	8	0.0004	0.16	AGFAGDDAPRAVFPSIVGRPR	K	H	0.436	1.97	0.137	2 156,1361
EC_212270_T33Vspike_12_A	Actin, clone 205 OS=Artemia sp. PE=2 SV=1	ACT1_ARTSX,ACT1_BACDO,ACT1_DIPDE,ACT1_DROME,ACT1_HELER,ACT1_LUMTE,ACT1_PODCA,ACT1_SCHCO,ACT1_SCHMA,ACT1_STRFN,ACT2_ARTSX,ACT2_BACDO,ACT2_BOMMO,ACT2_DIPDE,ACT2_DROME,ACT2_LUMTE,ACT2_LYTPI,ACT2_MOLOC,ACT2_SACKO,ACT2_SCHMA,ACT2_STRFN,ACT2_SUIBO,ACT2_XENLA,ACT2_XENTR,ACT3A_HELAM,ACT3_BACDO,ACT3_BOMMO,ACT3_DROME,ACT3_LIMPO,ACT3_PODCA,ACT3_XENLA,ACT3_XENTR,ACT4_ARTSX,ACT5_BACDO,ACT5_CHICK,ACT5_DIPDE,AC…	41 786,8	1	5	6	8	0.0004	0.16	AVFPSIVGRPR	R	H	0.381	2.4	0.271	1 198,7055
EC_212270_T33Vspike_12_A	Actin, clone 205 OS=Artemia sp. PE=2 SV=1	ACT1_ARTSX,ACT1_BACDO,ACT1_DIPDE,ACT1_DROME,ACT1_HELER,ACT1_LUMTE,ACT1_PODCA,ACT1_SCHCO,ACT1_SCHMA,ACT1_STRFN,ACT2_ARTSX,ACT2_BACDO,ACT2_BOMMO,ACT2_DIPDE,ACT2_DROME,ACT2_LUMTE,ACT2_LYTPI,ACT2_MOLOC,ACT2_SACKO,ACT2_SCHMA,ACT2_STRFN,ACT2_SUIBO,ACT2_XENLA,ACT2_XENTR,ACT3A_HELAM,ACT3_BACDO,ACT3_BOMMO,ACT3_DROME,ACT3_LIMPO,ACT3_PODCA,ACT3_XENLA,ACT3_XENTR,ACT4_ARTSX,ACT5_BACDO,ACT5_CHICK,ACT5_DIPDE,AC…	41 786,8	1	5	6	8	0.0004	0.16	HQGVMVGMGQKDSYVGDEAQSK	R	R	0.386	1.75	-0.163	2 351,0757
EC_212270_T33Vspike_12_A	Actin, clone 205 OS=Artemia sp. PE=2 SV=1	ACT1_ARTSX,ACT1_BACDO,ACT1_DIPDE,ACT1_DROME,ACT1_HELER,ACT1_LUMTE,ACT1_PODCA,ACT1_SCHCO,ACT1_SCHMA,ACT1_STRFN,ACT2_ARTSX,ACT2_BACDO,ACT2_BOMMO,ACT2_DIPDE,ACT2_DROME,ACT2_LUMTE,ACT2_LYTPI,ACT2_MOLOC,ACT2_SACKO,ACT2_SCHMA,ACT2_STRFN,ACT2_SUIBO,ACT2_XENLA,ACT2_XENTR,ACT3A_HELAM,ACT3_BACDO,ACT3_BOMMO,ACT3_DROME,ACT3_LIMPO,ACT3_PODCA,ACT3_XENLA,ACT3_XENTR,ACT4_ARTSX,ACT5_BACDO,ACT5_CHICK,ACT5_DIPDE,AC…	41 786,8	1	5	6	8	0.0004	0.16	HQGVMVGMGQKDSYVGDEAQSKR	R	G	0.997	3.88	0.234	2 507,1768
EC_212270_T33Vspike_12_A	Actin, clone 205 OS=Artemia sp. PE=2 SV=1	ACT1_ARTSX,ACT1_BACDO,ACT1_DIPDE,ACT1_DROME,ACT1_HELER,ACT1_LUMTE,ACT1_PODCA,ACT1_SCHCO,ACT1_SCHMA,ACT1_STRFN,ACT2_ARTSX,ACT2_BACDO,ACT2_BOMMO,ACT2_DIPDE,ACT2_DROME,ACT2_LUMTE,ACT2_LYTPI,ACT2_MOLOC,ACT2_SACKO,ACT2_SCHMA,ACT2_STRFN,ACT2_SUIBO,ACT2_XENLA,ACT2_XENTR,ACT3A_HELAM,ACT3_BACDO,ACT3_BOMMO,ACT3_DROME,ACT3_LIMPO,ACT3_PODCA,ACT3_XENLA,ACT3_XENTR,ACT4_ARTSX,ACT5_BACDO,ACT5_CHICK,ACT5_DIPDE,AC…	41 786,8	1	5	6	8	0.0004	0.16	SYELPDGQVLTIGNER	K	F	0.493	1.42	-0.0143	1 790,8921
EC_212270_T33Vspike_12_B	Actin, clone 205 OS=Artemia sp. PE=2 SV=1	ACT1_ARTSX,ACT1_BACDO,ACT1_DIPDE,ACT1_DROME,ACT1_HELER,ACT1_LUMTE,ACT1_PODCA,ACT1_SCHCO,ACT1_SCHMA,ACT1_STRFN,ACT2_ARTSX,ACT2_BACDO,ACT2_BOMMO,ACT2_DIPDE,ACT2_DROME,ACT2_LUMTE,ACT2_LYTPI,ACT2_MOLOC,ACT2_SACKO,ACT2_SCHMA,ACT2_STRFN,ACT2_SUIBO,ACT2_XENLA,ACT2_XENTR,ACT3A_HELAM,ACT3_BACDO,ACT3_BOMMO,ACT3_DROME,ACT3_LIMPO,ACT3_PODCA,ACT3_XENLA,ACT3_XENTR,ACT4_ARTSX,ACT5_BACDO,ACT5_CHICK,ACT5_DIPDE,AC…	41 786,8	0.995	2	3	4	0.000214	0.13	AGFAGDDAPR	K	A	0.997	3.33	0.261	976.448
EC_212270_T33Vspike_12_B	Actin, clone 205 OS=Artemia sp. PE=2 SV=1	ACT1_ARTSX,ACT1_BACDO,ACT1_DIPDE,ACT1_DROME,ACT1_HELER,ACT1_LUMTE,ACT1_PODCA,ACT1_SCHCO,ACT1_SCHMA,ACT1_STRFN,ACT2_ARTSX,ACT2_BACDO,ACT2_BOMMO,ACT2_DIPDE,ACT2_DROME,ACT2_LUMTE,ACT2_LYTPI,ACT2_MOLOC,ACT2_SACKO,ACT2_SCHMA,ACT2_STRFN,ACT2_SUIBO,ACT2_XENLA,ACT2_XENTR,ACT3A_HELAM,ACT3_BACDO,ACT3_BOMMO,ACT3_DROME,ACT3_LIMPO,ACT3_PODCA,ACT3_XENLA,ACT3_XENTR,ACT4_ARTSX,ACT5_BACDO,ACT5_CHICK,ACT5_DIPDE,AC…	41 786,8	0.995	2	3	4	0.000214	0.13	HQGVMVGMGQKDSYVGDEAQSKR	R	G	0.798	2.5	0.109	2 507,1768
EC_212270_T33Vspike_12_B	Actin, clone 205 OS=Artemia sp. PE=2 SV=1	ACT1_ARTSX,ACT1_BACDO,ACT1_DIPDE,ACT1_DROME,ACT1_HELER,ACT1_LUMTE,ACT1_PODCA,ACT1_SCHCO,ACT1_SCHMA,ACT1_STRFN,ACT2_ARTSX,ACT2_BACDO,ACT2_BOMMO,ACT2_DIPDE,ACT2_DROME,ACT2_LUMTE,ACT2_LYTPI,ACT2_MOLOC,ACT2_SACKO,ACT2_SCHMA,ACT2_STRFN,ACT2_SUIBO,ACT2_XENLA,ACT2_XENTR,ACT3A_HELAM,ACT3_BACDO,ACT3_BOMMO,ACT3_DROME,ACT3_LIMPO,ACT3_PODCA,ACT3_XENLA,ACT3_XENTR,ACT4_ARTSX,ACT5_BACDO,ACT5_CHICK,ACT5_DIPDE,AC…	41 786,8	0.995	2	3	4	0.000214	0.13	SYELPDGQVLTIGNER	K	F	0.495	1.88	0.199	1 790,8921
EC_212270_T33Vspike_6_A	Actin-5C OS=Drosophila melanogaster GN=Act5C PE=1 SV=4	ACT1_DROME,ACT2_DROME,ACT2_MOLOC,ACT2_SCHMA,ACT2_XENLA,ACT2_XENTR,ACT3A_HELAM,ACT3_LIMPO,ACT3_XENLA,ACT3_XENTR,ACT4_ARTSX,ACT5_CHICK,ACT5_XENLA	41 822,7	1	1	1	4	0.000221	0.117	AGFAGDDAPR	K	A	0.997	3.11	0.314	976.448
EC_212270_T33Vspike_6_A	Actin-5C OS=Drosophila melanogaster GN=Act5C PE=1 SV=4	ACT1_DROME,ACT2_DROME,ACT2_MOLOC,ACT2_SCHMA,ACT2_XENLA,ACT2_XENTR,ACT3A_HELAM,ACT3_LIMPO,ACT3_XENLA,ACT3_XENTR,ACT4_ARTSX,ACT5_CHICK,ACT5_XENLA	41 822,7	1	1	1	4	0.000221	0.117	AGFAGDDAPRAVFPSIVGRPR	K	H	0.997	4.05	0.518	2 156,1361
EC_212270_T33Vspike_6_A	Actin-5C OS=Drosophila melanogaster GN=Act5C PE=1 SV=4	ACT1_DROME,ACT2_DROME,ACT2_MOLOC,ACT2_SCHMA,ACT2_XENLA,ACT2_XENTR,ACT3A_HELAM,ACT3_LIMPO,ACT3_XENLA,ACT3_XENTR,ACT4_ARTSX,ACT5_CHICK,ACT5_XENLA	41 822,7	1	1	1	4	0.000221	0.117	HQGVMVGMGQKDSYVGDEAQSKR	R	G	0.997	2.9	0.319	2 507,1768
EC_212270_T33Vspike_6_B	Actin-5C OS=Drosophila melanogaster GN=Act5C PE=1 SV=4	ACT1_DROME,ACT2_DROME,ACT2_MOLOC,ACT2_SCHMA,ACT2_XENLA,ACT2_XENTR,ACT3A_HELAM,ACT3_LIMPO,ACT3_XENLA,ACT3_XENTR,ACT4_ARTSX,ACT5_CHICK,ACT5_XENLA	41 822,7	1	2	2	5	0.0003	0.136	AGFAGDDAPR	K	A	0.997	3.14	0.388	976.448
EC_212270_T33Vspike_6_B	Actin-5C OS=Drosophila melanogaster GN=Act5C PE=1 SV=4	ACT1_DROME,ACT2_DROME,ACT2_MOLOC,ACT2_SCHMA,ACT2_XENLA,ACT2_XENTR,ACT3A_HELAM,ACT3_LIMPO,ACT3_XENLA,ACT3_XENTR,ACT4_ARTSX,ACT5_CHICK,ACT5_XENLA	41 822,7	1	2	2	5	0.0003	0.136	AGFAGDDAPRAVFPSIVGRPR	K	H	0.997	3.57	0.412	2 156,1361
EC_212270_T33Vspike_6_B	Actin-5C OS=Drosophila melanogaster GN=Act5C PE=1 SV=4	ACT1_DROME,ACT2_DROME,ACT2_MOLOC,ACT2_SCHMA,ACT2_XENLA,ACT2_XENTR,ACT3A_HELAM,ACT3_LIMPO,ACT3_XENLA,ACT3_XENTR,ACT4_ARTSX,ACT5_CHICK,ACT5_XENLA	41 822,7	1	2	2	5	0.0003	0.136	AVFPSIVGRPR	R	H	0.947	2.63	0.351	1 198,7055
EC_212270_T33Vspike_6_B	Actin-5C OS=Drosophila melanogaster GN=Act5C PE=1 SV=4	ACT1_DROME,ACT2_DROME,ACT2_MOLOC,ACT2_SCHMA,ACT2_XENLA,ACT2_XENTR,ACT3A_HELAM,ACT3_LIMPO,ACT3_XENLA,ACT3_XENTR,ACT4_ARTSX,ACT5_CHICK,ACT5_XENLA	41 822,7	1	2	2	5	0.0003	0.136	MQKEITALAPSTMK	R	I	0.997	2.84	0.394	1 548,8126
EC_212270_T33Vspike_6_B	Actin-5C OS=Drosophila melanogaster GN=Act5C PE=1 SV=4	ACT1_DROME,ACT2_DROME,ACT2_MOLOC,ACT2_SCHMA,ACT2_XENLA,ACT2_XENTR,ACT3A_HELAM,ACT3_LIMPO,ACT3_XENLA,ACT3_XENTR,ACT4_ARTSX,ACT5_CHICK,ACT5_XENLA	41 822,7	1	2	2	5	0.0003	0.136	SYELPDGQVITIGNER	K	F	0.898	2.45	0.334	1 790,8921
EC_212270_T33Vspike_1_A	Actin-5C OS=Drosophila melanogaster GN=Act5C PE=1 SV=4	ACT1_DROME,ACT2_DROME,ACT2_MOLOC,ACT2_SCHMA,ACT3A_HELAM,ACT3_LIMPO,ACT4_ARTSX,ACT5_CHICK,ACT5_XENLA	41 822,7	1	2	2	9	0.000387	0.16	AGFAGDDAPR	K	A	0.841	2	0.336	976.448
EC_212270_T33Vspike_1_A	Actin-5C OS=Drosophila melanogaster GN=Act5C PE=1 SV=4	ACT1_DROME,ACT2_DROME,ACT2_MOLOC,ACT2_SCHMA,ACT3A_HELAM,ACT3_LIMPO,ACT4_ARTSX,ACT5_CHICK,ACT5_XENLA	41 822,7	1	2	2	9	0.000387	0.16	AVFPSIVGRPR	R	H	0.94	2.68	0.366	1 198,7055
EC_212270_T33Vspike_1_A	Actin-5C OS=Drosophila melanogaster GN=Act5C PE=1 SV=4	ACT1_DROME,ACT2_DROME,ACT2_MOLOC,ACT2_SCHMA,ACT3A_HELAM,ACT3_LIMPO,ACT4_ARTSX,ACT5_CHICK,ACT5_XENLA	41 822,7	1	2	2	9	0.000387	0.16	HQGVMVGMGQKDSYVGDEAQSK	R	R	0.825	2.53	0.308	2 351,0757
EC_212270_T33Vspike_1_A	Actin-5C OS=Drosophila melanogaster GN=Act5C PE=1 SV=4	ACT1_DROME,ACT2_DROME,ACT2_MOLOC,ACT2_SCHMA,ACT3A_HELAM,ACT3_LIMPO,ACT4_ARTSX,ACT5_CHICK,ACT5_XENLA	41 822,7	1	2	2	9	0.000387	0.16	HQGVMVGMGQKDSYVGDEAQSKR	R	G	0.997	3.01	0.151	2 507,1768
EC_212270_T33Vspike_1_A	Actin-5C OS=Drosophila melanogaster GN=Act5C PE=1 SV=4	ACT1_DROME,ACT2_DROME,ACT2_MOLOC,ACT2_SCHMA,ACT3A_HELAM,ACT3_LIMPO,ACT4_ARTSX,ACT5_CHICK,ACT5_XENLA	41 822,7	1	2	2	9	0.000387	0.16	MQKEITALAPSTMK	R	I	0.997	3.67	0.489	1 548,8126
EC_212270_T33Vspike_1_A	Actin-5C OS=Drosophila melanogaster GN=Act5C PE=1 SV=4	ACT1_DROME,ACT2_DROME,ACT2_MOLOC,ACT2_SCHMA,ACT3A_HELAM,ACT3_LIMPO,ACT4_ARTSX,ACT5_CHICK,ACT5_XENLA	41 822,7	1	2	2	9	0.000387	0.16	MQKEITALAPSTMKIK	R	I	0.997	2.76	0.204	1 789,9917
EC_212270_T33Vspike_1_B	Actin-5C OS=Drosophila melanogaster GN=Act5C PE=1 SV=4	ACT1_DROME,ACT2_DROME,ACT2_MOLOC,ACT2_SCHMA,ACT3A_HELAM,ACT3_LIMPO,ACT4_ARTSX,ACT5_CHICK,ACT5_XENLA	41 822,7	1	4	4	9	0.000409	0.25	AGFAGDDAPRAVFPSIVGRPR	K	H	0.973	3	0.373	2 156,1361
EC_212270_T33Vspike_1_B	Actin-5C OS=Drosophila melanogaster GN=Act5C PE=1 SV=4	ACT1_DROME,ACT2_DROME,ACT2_MOLOC,ACT2_SCHMA,ACT3A_HELAM,ACT3_LIMPO,ACT4_ARTSX,ACT5_CHICK,ACT5_XENLA	41 822,7	1	4	4	9	0.000409	0.25	AVFPSIVGRPR	R	H	0.968	3.22	0.334	1 198,7055
EC_212270_T33Vspike_1_B	Actin-5C OS=Drosophila melanogaster GN=Act5C PE=1 SV=4	ACT1_DROME,ACT2_DROME,ACT2_MOLOC,ACT2_SCHMA,ACT3A_HELAM,ACT3_LIMPO,ACT4_ARTSX,ACT5_CHICK,ACT5_XENLA	41 822,7	1	4	4	9	0.000409	0.25	HQGVMVGMGQKDSYVGDEAQSKR	R	G	0.997	4.02	0.173	2 507,1768
EC_212270_T33Vspike_1_B	Actin-5C OS=Drosophila melanogaster GN=Act5C PE=1 SV=4	ACT1_DROME,ACT2_DROME,ACT2_MOLOC,ACT2_SCHMA,ACT3A_HELAM,ACT3_LIMPO,ACT4_ARTSX,ACT5_CHICK,ACT5_XENLA	41 822,7	1	4	4	9	0.000409	0.25	MQKEITALAPSTMK	R	I	0.997	3.49	0.447	1 548,8126
EC_212270_T33Vspike_1_B	Actin-5C OS=Drosophila melanogaster GN=Act5C PE=1 SV=4	ACT1_DROME,ACT2_DROME,ACT2_MOLOC,ACT2_SCHMA,ACT3A_HELAM,ACT3_LIMPO,ACT4_ARTSX,ACT5_CHICK,ACT5_XENLA	41 822,7	1	4	4	9	0.000409	0.25	MQKEITALAPSTMKIK	R	I	0.923	2.8	0.116	1 789,9917
EC_212270_T33Vspike_1_B	Actin-5C OS=Drosophila melanogaster GN=Act5C PE=1 SV=4	ACT1_DROME,ACT2_DROME,ACT2_MOLOC,ACT2_SCHMA,ACT3A_HELAM,ACT3_LIMPO,ACT4_ARTSX,ACT5_CHICK,ACT5_XENLA	41 822,7	1	4	4	9	0.000409	0.25	SYELPDGQVITIGNER	K	F	0.962	2.44	0.368	1 790,8921
EC_212270_T33Vspike_1_B	Actin-5C OS=Drosophila melanogaster GN=Act5C PE=1 SV=4	ACT1_DROME,ACT2_DROME,ACT2_MOLOC,ACT2_SCHMA,ACT3A_HELAM,ACT3_LIMPO,ACT4_ARTSX,ACT5_CHICK,ACT5_XENLA	41 822,7	1	4	4	9	0.000409	0.25	VAPEEHPVLLTEAPLNPK	R	A	0.823	2.8	0.214	1 954,0646
EC_212270_T33Vspike_3_A	Actin-5C OS=Drosophila melanogaster GN=Act5C PE=1 SV=4	ACT1_DROME,ACT2_DROME,ACT2_MOLOC,ACT2_SCHMA,ACT3A_HELAM,ACT3_LIMPO,ACT4_ARTSX,ACT5_CHICK,ACT5_XENLA	42 264,1	1	3	4	11	0.000553	0.202	AGFAGDDAPR	K	A	0.966	2.27	0.274	976.448
EC_212270_T33Vspike_3_A	Actin-5C OS=Drosophila melanogaster GN=Act5C PE=1 SV=4	ACT1_DROME,ACT2_DROME,ACT2_MOLOC,ACT2_SCHMA,ACT3A_HELAM,ACT3_LIMPO,ACT4_ARTSX,ACT5_CHICK,ACT5_XENLA	42 264,1	1	3	4	11	0.000553	0.202	AVFPSIVGRPR	R	H	0.882	2.59	0.3	1 198,7055
EC_212270_T33Vspike_3_A	Actin-5C OS=Drosophila melanogaster GN=Act5C PE=1 SV=4	ACT1_DROME,ACT2_DROME,ACT2_MOLOC,ACT2_SCHMA,ACT3A_HELAM,ACT3_LIMPO,ACT4_ARTSX,ACT5_CHICK,ACT5_XENLA	42 264,1	1	3	4	11	0.000553	0.202	HQGVMVGMGQKDSYVGDEAQSK	R	R	0.893	2.83	0.178	2 351,0757
EC_212270_T33Vspike_3_A	Actin-5C OS=Drosophila melanogaster GN=Act5C PE=1 SV=4	ACT1_DROME,ACT2_DROME,ACT2_MOLOC,ACT2_SCHMA,ACT3A_HELAM,ACT3_LIMPO,ACT4_ARTSX,ACT5_CHICK,ACT5_XENLA	42 264,1	1	3	4	11	0.000553	0.202	HQGVMVGMGQKDSYVGDEAQSKR	R	G	0.997	3.49	0.0939	2 507,1768
EC_212270_T33Vspike_3_A	Actin-5C OS=Drosophila melanogaster GN=Act5C PE=1 SV=4	ACT1_DROME,ACT2_DROME,ACT2_MOLOC,ACT2_SCHMA,ACT3A_HELAM,ACT3_LIMPO,ACT4_ARTSX,ACT5_CHICK,ACT5_XENLA	42 264,1	1	3	4	11	0.000553	0.202	MQKEITALAPSTMK	R	I	0.997	3.41	0.374	1 548,8126
EC_212270_T33Vspike_3_A	Actin-5C OS=Drosophila melanogaster GN=Act5C PE=1 SV=4	ACT1_DROME,ACT2_DROME,ACT2_MOLOC,ACT2_SCHMA,ACT3A_HELAM,ACT3_LIMPO,ACT4_ARTSX,ACT5_CHICK,ACT5_XENLA	42 264,1	1	3	4	11	0.000553	0.202	VAPEEHPVLLTEAPLNPK	R	A	0.493	2.25	0.216	1 954,0646
EC_212270_T33Vspike_3_B	Actin-5C OS=Drosophila melanogaster GN=Act5C PE=1 SV=4	ACT1_DROME,ACT2_DROME,ACT2_MOLOC,ACT2_SCHMA,ACT3A_HELAM,ACT3_LIMPO,ACT4_ARTSX,ACT5_CHICK,ACT5_XENLA	41 822,7	1	4	4	9	0.000472	0.197	AGFAGDDAPR	K	A	0.994	2.13	0.209	976.448
EC_212270_T33Vspike_3_B	Actin-5C OS=Drosophila melanogaster GN=Act5C PE=1 SV=4	ACT1_DROME,ACT2_DROME,ACT2_MOLOC,ACT2_SCHMA,ACT3A_HELAM,ACT3_LIMPO,ACT4_ARTSX,ACT5_CHICK,ACT5_XENLA	41 822,7	1	4	4	9	0.000472	0.197	AVFPSIVGRPR	R	H	0.846	2.7	0.325	1 198,7055
EC_212270_T33Vspike_3_B	Actin-5C OS=Drosophila melanogaster GN=Act5C PE=1 SV=4	ACT1_DROME,ACT2_DROME,ACT2_MOLOC,ACT2_SCHMA,ACT3A_HELAM,ACT3_LIMPO,ACT4_ARTSX,ACT5_CHICK,ACT5_XENLA	41 822,7	1	4	4	9	0.000472	0.197	HQGVMVGMGQKDSYVGDEAQSK	R	R	0.379	2.12	0.183	2 351,0757
EC_212270_T33Vspike_3_B	Actin-5C OS=Drosophila melanogaster GN=Act5C PE=1 SV=4	ACT1_DROME,ACT2_DROME,ACT2_MOLOC,ACT2_SCHMA,ACT3A_HELAM,ACT3_LIMPO,ACT4_ARTSX,ACT5_CHICK,ACT5_XENLA	41 822,7	1	4	4	9	0.000472	0.197	HQGVMVGMGQKDSYVGDEAQSKR	R	G	0.968	1.91	0.137	2 507,1768
EC_212270_T33Vspike_3_B	Actin-5C OS=Drosophila melanogaster GN=Act5C PE=1 SV=4	ACT1_DROME,ACT2_DROME,ACT2_MOLOC,ACT2_SCHMA,ACT3A_HELAM,ACT3_LIMPO,ACT4_ARTSX,ACT5_CHICK,ACT5_XENLA	41 822,7	1	4	4	9	0.000472	0.197	MQKEITALAPSTMK	R	I	0.997	2.99	0.346	1 548,8126
EC_212270_T33Vspike_3_B	Actin-5C OS=Drosophila melanogaster GN=Act5C PE=1 SV=4	ACT1_DROME,ACT2_DROME,ACT2_MOLOC,ACT2_SCHMA,ACT3A_HELAM,ACT3_LIMPO,ACT4_ARTSX,ACT5_CHICK,ACT5_XENLA	41 822,7	1	4	4	9	0.000472	0.197	SYELPDGQVITIGNER	K	F	0.813	1.95	0.22	1 790,8921
EC_212270_T33Vspike_8_A	Actin-5C OS=Drosophila melanogaster GN=Act5C PE=1 SV=4	ACT1_DROME,ACT2_DROME,ACT2_MOLOC,ACT2_SCHMA,ACT3A_HELAM,ACT3_LIMPO,ACT4_ARTSX,ACT5_CHICK,ACT5_XENLA	41 822,7	1	3	4	9	0.000422	0.154	AGFAGDDAPR	K	A	0.997	3.42	0.326	976.448
EC_212270_T33Vspike_8_A	Actin-5C OS=Drosophila melanogaster GN=Act5C PE=1 SV=4	ACT1_DROME,ACT2_DROME,ACT2_MOLOC,ACT2_SCHMA,ACT3A_HELAM,ACT3_LIMPO,ACT4_ARTSX,ACT5_CHICK,ACT5_XENLA	41 822,7	1	3	4	9	0.000422	0.154	AGFAGDDAPRAVFPSIVGRPR	K	H	0.977	3.19	0.352	2 156,1361
EC_212270_T33Vspike_8_A	Actin-5C OS=Drosophila melanogaster GN=Act5C PE=1 SV=4	ACT1_DROME,ACT2_DROME,ACT2_MOLOC,ACT2_SCHMA,ACT3A_HELAM,ACT3_LIMPO,ACT4_ARTSX,ACT5_CHICK,ACT5_XENLA	41 822,7	1	3	4	9	0.000422	0.154	HQGVMVGMGQKDSYVGDEAQSK	R	R	0.866	2.79	0.314	2 351,0757
EC_212270_T33Vspike_8_A	Actin-5C OS=Drosophila melanogaster GN=Act5C PE=1 SV=4	ACT1_DROME,ACT2_DROME,ACT2_MOLOC,ACT2_SCHMA,ACT3A_HELAM,ACT3_LIMPO,ACT4_ARTSX,ACT5_CHICK,ACT5_XENLA	41 822,7	1	3	4	9	0.000422	0.154	HQGVMVGMGQKDSYVGDEAQSKR	R	G	0.97	3.3	0.165	2 507,1768
EC_212270_T33Vspike_8_A	Actin-5C OS=Drosophila melanogaster GN=Act5C PE=1 SV=4	ACT1_DROME,ACT2_DROME,ACT2_MOLOC,ACT2_SCHMA,ACT3A_HELAM,ACT3_LIMPO,ACT4_ARTSX,ACT5_CHICK,ACT5_XENLA	41 822,7	1	3	4	9	0.000422	0.154	MQKEITALAPSTMK	R	I	0.976	3	0.408	1 548,8126
EC_212270_T33Vspike_8_B	Actin-5C OS=Drosophila melanogaster GN=Act5C PE=1 SV=4	ACT1_DROME,ACT2_DROME,ACT2_MOLOC,ACT2_SCHMA,ACT3A_HELAM,ACT3_LIMPO,ACT4_ARTSX,ACT5_CHICK,ACT5_XENLA	41 822,7	1	3	3	7	0.000335	0.245	AGFAGDDAPR	K	A	0.997	2.75	0.228	976.448
EC_212270_T33Vspike_8_B	Actin-5C OS=Drosophila melanogaster GN=Act5C PE=1 SV=4	ACT1_DROME,ACT2_DROME,ACT2_MOLOC,ACT2_SCHMA,ACT3A_HELAM,ACT3_LIMPO,ACT4_ARTSX,ACT5_CHICK,ACT5_XENLA	41 822,7	1	3	3	7	0.000335	0.245	AGFAGDDAPRAVFPSIVGRPR	K	H	0.997	3.49	0.309	2 156,1361
EC_212270_T33Vspike_8_B	Actin-5C OS=Drosophila melanogaster GN=Act5C PE=1 SV=4	ACT1_DROME,ACT2_DROME,ACT2_MOLOC,ACT2_SCHMA,ACT3A_HELAM,ACT3_LIMPO,ACT4_ARTSX,ACT5_CHICK,ACT5_XENLA	41 822,7	1	3	3	7	0.000335	0.245	AVFPSIVGRPR	R	H	0.934	2.53	0.32	1 198,7055
EC_212270_T33Vspike_8_B	Actin-5C OS=Drosophila melanogaster GN=Act5C PE=1 SV=4	ACT1_DROME,ACT2_DROME,ACT2_MOLOC,ACT2_SCHMA,ACT3A_HELAM,ACT3_LIMPO,ACT4_ARTSX,ACT5_CHICK,ACT5_XENLA	41 822,7	1	3	3	7	0.000335	0.245	HQGVMVGMGQKDSYVGDEAQSKR	R	G	0.997	4.01	0.13	2 507,1768
EC_212270_T33Vspike_8_B	Actin-5C OS=Drosophila melanogaster GN=Act5C PE=1 SV=4	ACT1_DROME,ACT2_DROME,ACT2_MOLOC,ACT2_SCHMA,ACT3A_HELAM,ACT3_LIMPO,ACT4_ARTSX,ACT5_CHICK,ACT5_XENLA	41 822,7	1	3	3	7	0.000335	0.245	MQKEITALAPSTMK	R	I	0.997	3.72	0.407	1 548,8126
EC_212270_T33Vspike_8_B	Actin-5C OS=Drosophila melanogaster GN=Act5C PE=1 SV=4	ACT1_DROME,ACT2_DROME,ACT2_MOLOC,ACT2_SCHMA,ACT3A_HELAM,ACT3_LIMPO,ACT4_ARTSX,ACT5_CHICK,ACT5_XENLA	41 822,7	1	3	3	7	0.000335	0.245	SYELPDGQVITIGNER	K	F	0.949	2.53	0.372	1 790,8921
EC_212270_T33Vspike_8_B	Actin-5C OS=Drosophila melanogaster GN=Act5C PE=1 SV=4	ACT1_DROME,ACT2_DROME,ACT2_MOLOC,ACT2_SCHMA,ACT3A_HELAM,ACT3_LIMPO,ACT4_ARTSX,ACT5_CHICK,ACT5_XENLA	41 822,7	1	3	3	7	0.000335	0.245	VAPEEHPVLLTEAPLNPK	R	A	0.884	2.56	0.246	1 954,0646
EC_212270_T33Vspike_9_A	Actin-5C OS=Drosophila melanogaster GN=Act5C PE=1 SV=4	ACT1_DROME,ACT2_DROME,ACT2_MOLOC,ACT2_SCHMA,ACT3A_HELAM,ACT3_LIMPO,ACT4_ARTSX,ACT5_CHICK,ACT5_XENLA	41 822,7	1	4	4	7	0.000339	0.197	AGFAGDDAPR	K	A	0.997	2.6	0.205	976.448
EC_212270_T33Vspike_9_A	Actin-5C OS=Drosophila melanogaster GN=Act5C PE=1 SV=4	ACT1_DROME,ACT2_DROME,ACT2_MOLOC,ACT2_SCHMA,ACT3A_HELAM,ACT3_LIMPO,ACT4_ARTSX,ACT5_CHICK,ACT5_XENLA	41 822,7	1	4	4	7	0.000339	0.197	AGFAGDDAPRAVFPSIVGRPR	K	H	0.997	3.72	0.327	2 156,1361
EC_212270_T33Vspike_9_A	Actin-5C OS=Drosophila melanogaster GN=Act5C PE=1 SV=4	ACT1_DROME,ACT2_DROME,ACT2_MOLOC,ACT2_SCHMA,ACT3A_HELAM,ACT3_LIMPO,ACT4_ARTSX,ACT5_CHICK,ACT5_XENLA	41 822,7	1	4	4	7	0.000339	0.197	AVFPSIVGRPR	R	H	0.918	2.38	0.301	1 198,7055
EC_212270_T33Vspike_9_A	Actin-5C OS=Drosophila melanogaster GN=Act5C PE=1 SV=4	ACT1_DROME,ACT2_DROME,ACT2_MOLOC,ACT2_SCHMA,ACT3A_HELAM,ACT3_LIMPO,ACT4_ARTSX,ACT5_CHICK,ACT5_XENLA	41 822,7	1	4	4	7	0.000339	0.197	HQGVMVGMGQKDSYVGDEAQSK	R	R	0.949	2.17	0.377	2 351,0757
EC_212270_T33Vspike_9_A	Actin-5C OS=Drosophila melanogaster GN=Act5C PE=1 SV=4	ACT1_DROME,ACT2_DROME,ACT2_MOLOC,ACT2_SCHMA,ACT3A_HELAM,ACT3_LIMPO,ACT4_ARTSX,ACT5_CHICK,ACT5_XENLA	41 822,7	1	4	4	7	0.000339	0.197	HQGVMVGMGQKDSYVGDEAQSKR	R	G	0.997	3.12	0.239	2 507,1768
EC_212270_T33Vspike_9_A	Actin-5C OS=Drosophila melanogaster GN=Act5C PE=1 SV=4	ACT1_DROME,ACT2_DROME,ACT2_MOLOC,ACT2_SCHMA,ACT3A_HELAM,ACT3_LIMPO,ACT4_ARTSX,ACT5_CHICK,ACT5_XENLA	41 822,7	1	4	4	7	0.000339	0.197	MQKEITALAPSTMK	R	I	0.995	2.98	0.302	1 548,8126
EC_212270_T33Vspike_9_A	Actin-5C OS=Drosophila melanogaster GN=Act5C PE=1 SV=4	ACT1_DROME,ACT2_DROME,ACT2_MOLOC,ACT2_SCHMA,ACT3A_HELAM,ACT3_LIMPO,ACT4_ARTSX,ACT5_CHICK,ACT5_XENLA	41 822,7	1	4	4	7	0.000339	0.197	SYELPDGQVITIGNER	K	F	0.997	3.34	0.385	1 790,8921
EC_212270_T33Vspike_9_B	Actin-5C OS=Drosophila melanogaster GN=Act5C PE=1 SV=4	ACT1_DROME,ACT2_DROME,ACT2_MOLOC,ACT2_SCHMA,ACT3A_HELAM,ACT3_LIMPO,ACT4_ARTSX,ACT5_CHICK,ACT5_XENLA	41 822,7	1	4	4	7	0.000361	0.197	AGFAGDDAPR	K	A	0.997	3.23	0.293	976.448
EC_212270_T33Vspike_9_B	Actin-5C OS=Drosophila melanogaster GN=Act5C PE=1 SV=4	ACT1_DROME,ACT2_DROME,ACT2_MOLOC,ACT2_SCHMA,ACT3A_HELAM,ACT3_LIMPO,ACT4_ARTSX,ACT5_CHICK,ACT5_XENLA	41 822,7	1	4	4	7	0.000361	0.197	AVFPSIVGRPR	R	H	0.962	2.64	0.313	1 198,7055
EC_212270_T33Vspike_9_B	Actin-5C OS=Drosophila melanogaster GN=Act5C PE=1 SV=4	ACT1_DROME,ACT2_DROME,ACT2_MOLOC,ACT2_SCHMA,ACT3A_HELAM,ACT3_LIMPO,ACT4_ARTSX,ACT5_CHICK,ACT5_XENLA	41 822,7	1	4	4	7	0.000361	0.197	HQGVMVGMGQKDSYVGDEAQSK	R	R	0.906	2.2	0.305	2 351,0757
EC_212270_T33Vspike_9_B	Actin-5C OS=Drosophila melanogaster GN=Act5C PE=1 SV=4	ACT1_DROME,ACT2_DROME,ACT2_MOLOC,ACT2_SCHMA,ACT3A_HELAM,ACT3_LIMPO,ACT4_ARTSX,ACT5_CHICK,ACT5_XENLA	41 822,7	1	4	4	7	0.000361	0.197	HQGVMVGMGQKDSYVGDEAQSKR	R	G	0.997	3.49	0.247	2 507,1768
EC_212270_T33Vspike_9_B	Actin-5C OS=Drosophila melanogaster GN=Act5C PE=1 SV=4	ACT1_DROME,ACT2_DROME,ACT2_MOLOC,ACT2_SCHMA,ACT3A_HELAM,ACT3_LIMPO,ACT4_ARTSX,ACT5_CHICK,ACT5_XENLA	41 822,7	1	4	4	7	0.000361	0.197	MQKEITALAPSTMK	R	I	0.997	3.26	0.419	1 548,8126
EC_212270_T33Vspike_9_B	Actin-5C OS=Drosophila melanogaster GN=Act5C PE=1 SV=4	ACT1_DROME,ACT2_DROME,ACT2_MOLOC,ACT2_SCHMA,ACT3A_HELAM,ACT3_LIMPO,ACT4_ARTSX,ACT5_CHICK,ACT5_XENLA	41 822,7	1	4	4	7	0.000361	0.197	SYELPDGQVITIGNER	K	F	0.913	2.2	0.325	1 790,8921
EC_212270_T33Vspike_10_A	Actin-5C OS=Drosophila melanogaster GN=Act5C PE=1 SV=4	ACT1_DROME,ACT2_DROME,ACT2_MOLOC,ACT2_SCHMA,ACT3A_HELAM,ACT3_LIMPO,ACT4_ARTSX,ACT5_CHICK,ACT5_XENLA	41 822,7	0.998	0	0	6	0.000325	0.16	AGFAGDDAPR	K	A	0.997	2.94	0.215	976.448
EC_212270_T33Vspike_10_A	Actin-5C OS=Drosophila melanogaster GN=Act5C PE=1 SV=4	ACT1_DROME,ACT2_DROME,ACT2_MOLOC,ACT2_SCHMA,ACT3A_HELAM,ACT3_LIMPO,ACT4_ARTSX,ACT5_CHICK,ACT5_XENLA	41 822,7	0.998	0	0	6	0.000325	0.16	AVFPSIVGRPR	R	H	0.997	3.09	0.386	1 198,7055
EC_212270_T33Vspike_10_A	Actin-5C OS=Drosophila melanogaster GN=Act5C PE=1 SV=4	ACT1_DROME,ACT2_DROME,ACT2_MOLOC,ACT2_SCHMA,ACT3A_HELAM,ACT3_LIMPO,ACT4_ARTSX,ACT5_CHICK,ACT5_XENLA	41 822,7	0.998	0	0	6	0.000325	0.16	HQGVMVGMGQKDSYVGDEAQSK	R	R	0.826	2.52	0.295	2 351,0757
EC_212270_T33Vspike_10_A	Actin-5C OS=Drosophila melanogaster GN=Act5C PE=1 SV=4	ACT1_DROME,ACT2_DROME,ACT2_MOLOC,ACT2_SCHMA,ACT3A_HELAM,ACT3_LIMPO,ACT4_ARTSX,ACT5_CHICK,ACT5_XENLA	41 822,7	0.998	0	0	6	0.000325	0.16	HQGVMVGMGQKDSYVGDEAQSKR	R	G	0.997	3.59	0.11	2 507,1768
EC_212270_T33Vspike_10_A	Actin-5C OS=Drosophila melanogaster GN=Act5C PE=1 SV=4	ACT1_DROME,ACT2_DROME,ACT2_MOLOC,ACT2_SCHMA,ACT3A_HELAM,ACT3_LIMPO,ACT4_ARTSX,ACT5_CHICK,ACT5_XENLA	41 822,7	0.998	0	0	6	0.000325	0.16	SYELPDGQVITIGNER	K	F	0.846	2.15	0.348	1 790,8921
EC_212270_T33Vspike_10_B	Actin-5C OS=Drosophila melanogaster GN=Act5C PE=1 SV=4	ACT1_DROME,ACT2_DROME,ACT2_MOLOC,ACT2_SCHMA,ACT3A_HELAM,ACT3_LIMPO,ACT4_ARTSX,ACT5_CHICK,ACT5_XENLA	41 822,7	0.999	0	0	6	0.000318	0.16	AGFAGDDAPR	K	A	0.997	2.62	0.239	976.448
EC_212270_T33Vspike_10_B	Actin-5C OS=Drosophila melanogaster GN=Act5C PE=1 SV=4	ACT1_DROME,ACT2_DROME,ACT2_MOLOC,ACT2_SCHMA,ACT3A_HELAM,ACT3_LIMPO,ACT4_ARTSX,ACT5_CHICK,ACT5_XENLA	41 822,7	0.999	0	0	6	0.000318	0.16	AGFAGDDAPRAVFPSIVGRPR	K	H	0.997	3.68	0.339	2 156,1361
EC_212270_T33Vspike_10_B	Actin-5C OS=Drosophila melanogaster GN=Act5C PE=1 SV=4	ACT1_DROME,ACT2_DROME,ACT2_MOLOC,ACT2_SCHMA,ACT3A_HELAM,ACT3_LIMPO,ACT4_ARTSX,ACT5_CHICK,ACT5_XENLA	41 822,7	0.999	0	0	6	0.000318	0.16	AVFPSIVGRPR	R	H	0.909	2.87	0.378	1 198,7055
EC_212270_T33Vspike_10_B	Actin-5C OS=Drosophila melanogaster GN=Act5C PE=1 SV=4	ACT1_DROME,ACT2_DROME,ACT2_MOLOC,ACT2_SCHMA,ACT3A_HELAM,ACT3_LIMPO,ACT4_ARTSX,ACT5_CHICK,ACT5_XENLA	41 822,7	0.999	0	0	6	0.000318	0.16	HQGVMVGMGQKDSYVGDEAQSKR	R	G	0.997	4.15	0.227	2 507,1768
EC_212270_T33Vspike_10_B	Actin-5C OS=Drosophila melanogaster GN=Act5C PE=1 SV=4	ACT1_DROME,ACT2_DROME,ACT2_MOLOC,ACT2_SCHMA,ACT3A_HELAM,ACT3_LIMPO,ACT4_ARTSX,ACT5_CHICK,ACT5_XENLA	41 822,7	0.999	0	0	6	0.000318	0.16	SYELPDGQVITIGNER	K	F	0.921	2.67	0.361	1 790,8921
EC_212270_T33Vspike_2_A	Actin-5C OS=Drosophila melanogaster GN=Act5C PE=1 SV=4	ACT1_DROME,ACT2_DROME,ACT3A_HELAM,ACT3_LIMPO,ACT4_ARTSX,ACT5_CHICK,ACT5_XENLA	41 822,7	1	1	2	14	0.000584	0.245	AGFAGDDAPR	K	A	0.997	3.45	0.274	976.448
EC_212270_T33Vspike_2_A	Actin-5C OS=Drosophila melanogaster GN=Act5C PE=1 SV=4	ACT1_DROME,ACT2_DROME,ACT3A_HELAM,ACT3_LIMPO,ACT4_ARTSX,ACT5_CHICK,ACT5_XENLA	41 822,7	1	1	2	14	0.000584	0.245	AVFPSIVGRPR	R	H	0.984	2.97	0.414	1 198,7055
EC_212270_T33Vspike_2_A	Actin-5C OS=Drosophila melanogaster GN=Act5C PE=1 SV=4	ACT1_DROME,ACT2_DROME,ACT3A_HELAM,ACT3_LIMPO,ACT4_ARTSX,ACT5_CHICK,ACT5_XENLA	41 822,7	1	1	2	14	0.000584	0.245	HQGVMVGMGQKDSYVGDEAQSK	R	R	0.981	3.23	0.251	2 351,0757
EC_212270_T33Vspike_2_A	Actin-5C OS=Drosophila melanogaster GN=Act5C PE=1 SV=4	ACT1_DROME,ACT2_DROME,ACT3A_HELAM,ACT3_LIMPO,ACT4_ARTSX,ACT5_CHICK,ACT5_XENLA	41 822,7	1	1	2	14	0.000584	0.245	HQGVMVGMGQKDSYVGDEAQSKR	R	G	0.997	3.98	0.22	2 507,1768
EC_212270_T33Vspike_2_A	Actin-5C OS=Drosophila melanogaster GN=Act5C PE=1 SV=4	ACT1_DROME,ACT2_DROME,ACT3A_HELAM,ACT3_LIMPO,ACT4_ARTSX,ACT5_CHICK,ACT5_XENLA	41 822,7	1	1	2	14	0.000584	0.245	MQKEITALAPSTMK	R	I	0.997	3.37	0.335	1 548,8126
EC_212270_T33Vspike_2_A	Actin-5C OS=Drosophila melanogaster GN=Act5C PE=1 SV=4	ACT1_DROME,ACT2_DROME,ACT3A_HELAM,ACT3_LIMPO,ACT4_ARTSX,ACT5_CHICK,ACT5_XENLA	41 822,7	1	1	2	14	0.000584	0.245	SYELPDGQVITIGNER	K	F	0.911	2.4	0.29	1 790,8921
EC_212270_T33Vspike_2_A	Actin-5C OS=Drosophila melanogaster GN=Act5C PE=1 SV=4	ACT1_DROME,ACT2_DROME,ACT3A_HELAM,ACT3_LIMPO,ACT4_ARTSX,ACT5_CHICK,ACT5_XENLA	41 822,7	1	1	2	14	0.000584	0.245	VAPEEHPVLLTEAPLNPK	R	A	0.985	3.03	0.393	1 954,0646
EC_212270_T33Vspike_2_B	Actin-5C OS=Drosophila melanogaster GN=Act5C PE=1 SV=4	ACT1_DROME,ACT2_DROME,ACT3A_HELAM,ACT3_LIMPO,ACT4_ARTSX,ACT5_CHICK,ACT5_XENLA	41 822,7	1	3	3	18	0.000784	0.301	AGFAGDDAPR	K	A	0.997	2.94	0.187	976.448
EC_212270_T33Vspike_2_B	Actin-5C OS=Drosophila melanogaster GN=Act5C PE=1 SV=4	ACT1_DROME,ACT2_DROME,ACT3A_HELAM,ACT3_LIMPO,ACT4_ARTSX,ACT5_CHICK,ACT5_XENLA	41 822,7	1	3	3	18	0.000784	0.301	AGFAGDDAPRAVFPSIVGRPR	K	H	0.997	4.48	0.44	2 156,1361
EC_212270_T33Vspike_2_B	Actin-5C OS=Drosophila melanogaster GN=Act5C PE=1 SV=4	ACT1_DROME,ACT2_DROME,ACT3A_HELAM,ACT3_LIMPO,ACT4_ARTSX,ACT5_CHICK,ACT5_XENLA	41 822,7	1	3	3	18	0.000784	0.301	AVFPSIVGRPR	R	H	0.966	3.09	0.385	1 198,7055
EC_212270_T33Vspike_2_B	Actin-5C OS=Drosophila melanogaster GN=Act5C PE=1 SV=4	ACT1_DROME,ACT2_DROME,ACT3A_HELAM,ACT3_LIMPO,ACT4_ARTSX,ACT5_CHICK,ACT5_XENLA	41 822,7	1	3	3	18	0.000784	0.301	DLYANTVLSGGTTMYPGIADR	K	M	0.816	2.57	0.189	2 215,0702
EC_212270_T33Vspike_2_B	Actin-5C OS=Drosophila melanogaster GN=Act5C PE=1 SV=4	ACT1_DROME,ACT2_DROME,ACT3A_HELAM,ACT3_LIMPO,ACT4_ARTSX,ACT5_CHICK,ACT5_XENLA	41 822,7	1	3	3	18	0.000784	0.301	DSYVGDEAQSK	K	R	0.876	1.88	0.402	1 198,5223
EC_212270_T33Vspike_2_B	Actin-5C OS=Drosophila melanogaster GN=Act5C PE=1 SV=4	ACT1_DROME,ACT2_DROME,ACT3A_HELAM,ACT3_LIMPO,ACT4_ARTSX,ACT5_CHICK,ACT5_XENLA	41 822,7	1	3	3	18	0.000784	0.301	EITALAPSTMK	K	I	0.817	2.07	0.308	1 161,6185
EC_212270_T33Vspike_2_B	Actin-5C OS=Drosophila melanogaster GN=Act5C PE=1 SV=4	ACT1_DROME,ACT2_DROME,ACT3A_HELAM,ACT3_LIMPO,ACT4_ARTSX,ACT5_CHICK,ACT5_XENLA	41 822,7	1	3	3	18	0.000784	0.301	HQGVMVGMGQKDSYVGDEAQSK	R	R	0.811	2.62	0.227	2 351,0757
EC_212270_T33Vspike_2_B	Actin-5C OS=Drosophila melanogaster GN=Act5C PE=1 SV=4	ACT1_DROME,ACT2_DROME,ACT3A_HELAM,ACT3_LIMPO,ACT4_ARTSX,ACT5_CHICK,ACT5_XENLA	41 822,7	1	3	3	18	0.000784	0.301	HQGVMVGMGQKDSYVGDEAQSKR	R	G	0.997	3.76	0.129	2 507,1768
EC_212270_T33Vspike_2_B	Actin-5C OS=Drosophila melanogaster GN=Act5C PE=1 SV=4	ACT1_DROME,ACT2_DROME,ACT3A_HELAM,ACT3_LIMPO,ACT4_ARTSX,ACT5_CHICK,ACT5_XENLA	41 822,7	1	3	3	18	0.000784	0.301	MQKEITALAPSTMK	R	I	0.997	3.78	0.395	1 548,8126
EC_212270_T33Vspike_2_B	Actin-5C OS=Drosophila melanogaster GN=Act5C PE=1 SV=4	ACT1_DROME,ACT2_DROME,ACT3A_HELAM,ACT3_LIMPO,ACT4_ARTSX,ACT5_CHICK,ACT5_XENLA	41 822,7	1	3	3	18	0.000784	0.301	SYELPDGQVITIGNER	K	F	0.87	2.24	0.261	1 790,8921
EC_212270_T33Vspike_2_B	Actin-5C OS=Drosophila melanogaster GN=Act5C PE=1 SV=4	ACT1_DROME,ACT2_DROME,ACT3A_HELAM,ACT3_LIMPO,ACT4_ARTSX,ACT5_CHICK,ACT5_XENLA	41 822,7	1	3	3	18	0.000784	0.301	VAPEEHPVLLTEAPLNPK	R	A	0.994	3.36	0.367	1 954,0646
EC_212270_T33Vspike_5_A	Actin-5C OS=Drosophila melanogaster GN=Act5C PE=1 SV=4	ACT1_DROME,ACT2_DROME,ACT3A_HELAM,ACT3_LIMPO,ACT4_ARTSX,ACT5_CHICK,ACT5_XENLA	41 822,7	1	2	3	9	0.00038	0.202	AGFAGDDAPR	K	A	0.997	3.62	0.311	976.448
EC_212270_T33Vspike_5_A	Actin-5C OS=Drosophila melanogaster GN=Act5C PE=1 SV=4	ACT1_DROME,ACT2_DROME,ACT3A_HELAM,ACT3_LIMPO,ACT4_ARTSX,ACT5_CHICK,ACT5_XENLA	41 822,7	1	2	3	9	0.00038	0.202	AGFAGDDAPRAVFPSIVGRPR	K	H	0.997	4.18	0.414	2 156,1361
EC_212270_T33Vspike_5_A	Actin-5C OS=Drosophila melanogaster GN=Act5C PE=1 SV=4	ACT1_DROME,ACT2_DROME,ACT3A_HELAM,ACT3_LIMPO,ACT4_ARTSX,ACT5_CHICK,ACT5_XENLA	41 822,7	1	2	3	9	0.00038	0.202	AVFPSIVGRPR	R	H	0.963	2.86	0.347	1 198,7055
EC_212270_T33Vspike_5_A	Actin-5C OS=Drosophila melanogaster GN=Act5C PE=1 SV=4	ACT1_DROME,ACT2_DROME,ACT3A_HELAM,ACT3_LIMPO,ACT4_ARTSX,ACT5_CHICK,ACT5_XENLA	41 822,7	1	2	3	9	0.00038	0.202	EITALAPSTMK	K	I	0.875	2.28	0.26	1 161,6185
EC_212270_T33Vspike_5_A	Actin-5C OS=Drosophila melanogaster GN=Act5C PE=1 SV=4	ACT1_DROME,ACT2_DROME,ACT3A_HELAM,ACT3_LIMPO,ACT4_ARTSX,ACT5_CHICK,ACT5_XENLA	41 822,7	1	2	3	9	0.00038	0.202	HQGVMVGMGQKDSYVGDEAQSKR	R	G	0.995	3.54	0.153	2 507,1768
EC_212270_T33Vspike_5_A	Actin-5C OS=Drosophila melanogaster GN=Act5C PE=1 SV=4	ACT1_DROME,ACT2_DROME,ACT3A_HELAM,ACT3_LIMPO,ACT4_ARTSX,ACT5_CHICK,ACT5_XENLA	41 822,7	1	2	3	9	0.00038	0.202	MQKEITALAPSTMK	R	I	0.997	3.07	0.4	1 548,8126
EC_212270_T33Vspike_5_A	Actin-5C OS=Drosophila melanogaster GN=Act5C PE=1 SV=4	ACT1_DROME,ACT2_DROME,ACT3A_HELAM,ACT3_LIMPO,ACT4_ARTSX,ACT5_CHICK,ACT5_XENLA	41 822,7	1	2	3	9	0.00038	0.202	VAPEEHPVLLTEAPLNPK	R	A	0.967	2.83	0.336	1 954,0646
EC_212270_T33Vspike_5_B	Actin-5C OS=Drosophila melanogaster GN=Act5C PE=1 SV=4	ACT1_DROME,ACT2_DROME,ACT3A_HELAM,ACT3_LIMPO,ACT4_ARTSX,ACT5_CHICK,ACT5_XENLA	41 822,7	1	2	2	14	0.000714	0.16	AGFAGDDAPR	K	A	0.997	3.17	0.262	976.448
EC_212270_T33Vspike_5_B	Actin-5C OS=Drosophila melanogaster GN=Act5C PE=1 SV=4	ACT1_DROME,ACT2_DROME,ACT3A_HELAM,ACT3_LIMPO,ACT4_ARTSX,ACT5_CHICK,ACT5_XENLA	41 822,7	1	2	2	14	0.000714	0.16	AGFAGDDAPRAVFPSIVGRPR	K	H	0.997	3.71	0.48	2 156,1361
EC_212270_T33Vspike_5_B	Actin-5C OS=Drosophila melanogaster GN=Act5C PE=1 SV=4	ACT1_DROME,ACT2_DROME,ACT3A_HELAM,ACT3_LIMPO,ACT4_ARTSX,ACT5_CHICK,ACT5_XENLA	41 822,7	1	2	2	14	0.000714	0.16	AVFPSIVGRPR	R	H	0.951	2.63	0.345	1 198,7055
EC_212270_T33Vspike_5_B	Actin-5C OS=Drosophila melanogaster GN=Act5C PE=1 SV=4	ACT1_DROME,ACT2_DROME,ACT3A_HELAM,ACT3_LIMPO,ACT4_ARTSX,ACT5_CHICK,ACT5_XENLA	41 822,7	1	2	2	14	0.000714	0.16	HQGVMVGMGQKDSYVGDEAQSKR	R	G	0.997	4.02	0.208	2 507,1768
EC_212270_T33Vspike_5_B	Actin-5C OS=Drosophila melanogaster GN=Act5C PE=1 SV=4	ACT1_DROME,ACT2_DROME,ACT3A_HELAM,ACT3_LIMPO,ACT4_ARTSX,ACT5_CHICK,ACT5_XENLA	41 822,7	1	2	2	14	0.000714	0.16	MQKEITALAPSTMK	R	I	0.985	2.67	0.295	1 548,8126
EC_212270_T33Vspike_5_B	Actin-5C OS=Drosophila melanogaster GN=Act5C PE=1 SV=4	ACT1_DROME,ACT2_DROME,ACT3A_HELAM,ACT3_LIMPO,ACT4_ARTSX,ACT5_CHICK,ACT5_XENLA	41 822,7	1	2	2	14	0.000714	0.16	MQKEITALAPSTMKIK	R	I	0.997	3.02	0.198	1 789,9917
EC_212270_T33Vspike_7_A	Actin-5C OS=Drosophila melanogaster GN=Act5C PE=1 SV=4	ACT1_DROME,ACT2_DROME,ACT3A_HELAM,ACT3_LIMPO,ACT4_ARTSX,ACT5_CHICK,ACT5_XENLA	41 822,7	1	2	3	18	0.000814	0.301	AGFAGDDAPR	K	A	0.997	3.25	0.3	976.448
EC_212270_T33Vspike_7_A	Actin-5C OS=Drosophila melanogaster GN=Act5C PE=1 SV=4	ACT1_DROME,ACT2_DROME,ACT3A_HELAM,ACT3_LIMPO,ACT4_ARTSX,ACT5_CHICK,ACT5_XENLA	41 822,7	1	2	3	18	0.000814	0.301	AGFAGDDAPRAVFPSIVGRPR	K	H	0.997	3.53	0.472	2 156,1361
EC_212270_T33Vspike_7_A	Actin-5C OS=Drosophila melanogaster GN=Act5C PE=1 SV=4	ACT1_DROME,ACT2_DROME,ACT3A_HELAM,ACT3_LIMPO,ACT4_ARTSX,ACT5_CHICK,ACT5_XENLA	41 822,7	1	2	3	18	0.000814	0.301	AVFPSIVGRPR	R	H	0.985	3.46	0.431	1 198,7055
EC_212270_T33Vspike_7_A	Actin-5C OS=Drosophila melanogaster GN=Act5C PE=1 SV=4	ACT1_DROME,ACT2_DROME,ACT3A_HELAM,ACT3_LIMPO,ACT4_ARTSX,ACT5_CHICK,ACT5_XENLA	41 822,7	1	2	3	18	0.000814	0.301	DLYANTVLSGGTTMYPGIADR	K	M	0.778	2.93	0.119	2 215,0702
EC_212270_T33Vspike_7_A	Actin-5C OS=Drosophila melanogaster GN=Act5C PE=1 SV=4	ACT1_DROME,ACT2_DROME,ACT3A_HELAM,ACT3_LIMPO,ACT4_ARTSX,ACT5_CHICK,ACT5_XENLA	41 822,7	1	2	3	18	0.000814	0.301	EITALAPSTMK	K	I	0.934	2.31	0.242	1 161,6185
EC_212270_T33Vspike_7_A	Actin-5C OS=Drosophila melanogaster GN=Act5C PE=1 SV=4	ACT1_DROME,ACT2_DROME,ACT3A_HELAM,ACT3_LIMPO,ACT4_ARTSX,ACT5_CHICK,ACT5_XENLA	41 822,7	1	2	3	18	0.000814	0.301	HQGVMVGMGQKDSYVGDEAQSK	R	R	0.969	2.86	0.27	2 351,0757
EC_212270_T33Vspike_7_A	Actin-5C OS=Drosophila melanogaster GN=Act5C PE=1 SV=4	ACT1_DROME,ACT2_DROME,ACT3A_HELAM,ACT3_LIMPO,ACT4_ARTSX,ACT5_CHICK,ACT5_XENLA	41 822,7	1	2	3	18	0.000814	0.301	HQGVMVGMGQKDSYVGDEAQSKR	R	G	0.997	4.45	0.00897	2 507,1768
EC_212270_T33Vspike_7_A	Actin-5C OS=Drosophila melanogaster GN=Act5C PE=1 SV=4	ACT1_DROME,ACT2_DROME,ACT3A_HELAM,ACT3_LIMPO,ACT4_ARTSX,ACT5_CHICK,ACT5_XENLA	41 822,7	1	2	3	18	0.000814	0.301	MQKEITALAPSTMK	R	I	0.997	3.48	0.402	1 548,8126
EC_212270_T33Vspike_7_A	Actin-5C OS=Drosophila melanogaster GN=Act5C PE=1 SV=4	ACT1_DROME,ACT2_DROME,ACT3A_HELAM,ACT3_LIMPO,ACT4_ARTSX,ACT5_CHICK,ACT5_XENLA	41 822,7	1	2	3	18	0.000814	0.301	SYELPDGQVITIGNER	K	F	0.845	2.31	0.309	1 790,8921
EC_212270_T33Vspike_7_A	Actin-5C OS=Drosophila melanogaster GN=Act5C PE=1 SV=4	ACT1_DROME,ACT2_DROME,ACT3A_HELAM,ACT3_LIMPO,ACT4_ARTSX,ACT5_CHICK,ACT5_XENLA	41 822,7	1	2	3	18	0.000814	0.301	VAPEEHPVLLTEAPLNPK	R	A	0.997	3.88	0.414	1 954,0646
EC_212270_T33Vspike_7_B	Actin-5C OS=Drosophila melanogaster GN=Act5C PE=1 SV=4	ACT1_DROME,ACT2_DROME,ACT3A_HELAM,ACT3_LIMPO,ACT4_ARTSX,ACT5_CHICK,ACT5_XENLA	41 822,7	1	2	2	17	0.000773	0.263	AGFAGDDAPR	K	A	0.997	2.73	0.227	976.448
EC_212270_T33Vspike_7_B	Actin-5C OS=Drosophila melanogaster GN=Act5C PE=1 SV=4	ACT1_DROME,ACT2_DROME,ACT3A_HELAM,ACT3_LIMPO,ACT4_ARTSX,ACT5_CHICK,ACT5_XENLA	41 822,7	1	2	2	17	0.000773	0.263	AGFAGDDAPRAVFPSIVGRPR	K	H	0.997	4.03	0.468	2 156,1361
EC_212270_T33Vspike_7_B	Actin-5C OS=Drosophila melanogaster GN=Act5C PE=1 SV=4	ACT1_DROME,ACT2_DROME,ACT3A_HELAM,ACT3_LIMPO,ACT4_ARTSX,ACT5_CHICK,ACT5_XENLA	41 822,7	1	2	2	17	0.000773	0.263	AVFPSIVGRPR	R	H	0.884	2.56	0.255	1 198,7055
EC_212270_T33Vspike_7_B	Actin-5C OS=Drosophila melanogaster GN=Act5C PE=1 SV=4	ACT1_DROME,ACT2_DROME,ACT3A_HELAM,ACT3_LIMPO,ACT4_ARTSX,ACT5_CHICK,ACT5_XENLA	41 822,7	1	2	2	17	0.000773	0.263	DLYANTVLSGGTTMYPGIADR	K	M	0.673	2.93	0.124	2 215,0702
EC_212270_T33Vspike_7_B	Actin-5C OS=Drosophila melanogaster GN=Act5C PE=1 SV=4	ACT1_DROME,ACT2_DROME,ACT3A_HELAM,ACT3_LIMPO,ACT4_ARTSX,ACT5_CHICK,ACT5_XENLA	41 822,7	1	2	2	17	0.000773	0.263	HQGVMVGMGQKDSYVGDEAQSK	R	R	0.989	3	0.484	2 351,0757
EC_212270_T33Vspike_7_B	Actin-5C OS=Drosophila melanogaster GN=Act5C PE=1 SV=4	ACT1_DROME,ACT2_DROME,ACT3A_HELAM,ACT3_LIMPO,ACT4_ARTSX,ACT5_CHICK,ACT5_XENLA	41 822,7	1	2	2	17	0.000773	0.263	HQGVMVGMGQKDSYVGDEAQSKR	R	G	0.997	3.39	0.307	2 507,1768
EC_212270_T33Vspike_7_B	Actin-5C OS=Drosophila melanogaster GN=Act5C PE=1 SV=4	ACT1_DROME,ACT2_DROME,ACT3A_HELAM,ACT3_LIMPO,ACT4_ARTSX,ACT5_CHICK,ACT5_XENLA	41 822,7	1	2	2	17	0.000773	0.263	MQKEITALAPSTMK	R	I	0.997	4.14	0.484	1 548,8126
EC_212270_T33Vspike_7_B	Actin-5C OS=Drosophila melanogaster GN=Act5C PE=1 SV=4	ACT1_DROME,ACT2_DROME,ACT3A_HELAM,ACT3_LIMPO,ACT4_ARTSX,ACT5_CHICK,ACT5_XENLA	41 822,7	1	2	2	17	0.000773	0.263	MQKEITALAPSTMKIK	R	I	0.997	3.04	0.204	1 789,9917
EC_212270_T33Vspike_7_B	Actin-5C OS=Drosophila melanogaster GN=Act5C PE=1 SV=4	ACT1_DROME,ACT2_DROME,ACT3A_HELAM,ACT3_LIMPO,ACT4_ARTSX,ACT5_CHICK,ACT5_XENLA	41 822,7	1	2	2	17	0.000773	0.263	VAPEEHPVLLTEAPLNPK	R	A	0.997	3.48	0.459	1 954,0646
EC_212270_T33Vspike_4_A	Actin-5C OS=Drosophila melanogaster GN=Act5C PE=1 SV=4	ACT1_DROME,ACT3A_HELAM,ACT3_LIMPO,ACT4_ARTSX,ACT5_CHICK,ACT5_XENLA	41 822,7	1	1	2	9	0.000362	0.245	AGFAGDDAPR	K	A	0.997	3.1	0.244	976.448
EC_212270_T33Vspike_4_A	Actin-5C OS=Drosophila melanogaster GN=Act5C PE=1 SV=4	ACT1_DROME,ACT3A_HELAM,ACT3_LIMPO,ACT4_ARTSX,ACT5_CHICK,ACT5_XENLA	41 822,7	1	1	2	9	0.000362	0.245	AGFAGDDAPRAVFPSIVGRPR	K	H	0.997	3.43	0.365	2 156,1361
EC_212270_T33Vspike_4_A	Actin-5C OS=Drosophila melanogaster GN=Act5C PE=1 SV=4	ACT1_DROME,ACT3A_HELAM,ACT3_LIMPO,ACT4_ARTSX,ACT5_CHICK,ACT5_XENLA	41 822,7	1	1	2	9	0.000362	0.245	HQGVMVGMGQKDSYVGDEAQSKR	R	G	0.908	3.34	0.0756	2 507,1768
EC_212270_T33Vspike_4_A	Actin-5C OS=Drosophila melanogaster GN=Act5C PE=1 SV=4	ACT1_DROME,ACT3A_HELAM,ACT3_LIMPO,ACT4_ARTSX,ACT5_CHICK,ACT5_XENLA	41 822,7	1	1	2	9	0.000362	0.245	MQKEITALAPSTMK	R	I	0.997	3.91	0.372	1 548,8126
EC_212270_T33Vspike_4_A	Actin-5C OS=Drosophila melanogaster GN=Act5C PE=1 SV=4	ACT1_DROME,ACT3A_HELAM,ACT3_LIMPO,ACT4_ARTSX,ACT5_CHICK,ACT5_XENLA	41 822,7	1	1	2	9	0.000362	0.245	SYELPDGQVITIGNER	K	F	0.954	2.71	0.313	1 790,8921
EC_212270_T33Vspike_4_A	Actin-5C OS=Drosophila melanogaster GN=Act5C PE=1 SV=4	ACT1_DROME,ACT3A_HELAM,ACT3_LIMPO,ACT4_ARTSX,ACT5_CHICK,ACT5_XENLA	41 822,7	1	1	2	9	0.000362	0.245	VAPEEHPVLLTEAPLNPK	R	A	0.891	2.28	0.307	1 954,0646
EC_212270_T33Vspike_4_B	Actin-5C OS=Drosophila melanogaster GN=Act5C PE=1 SV=4	ACT1_DROME,ACT3A_HELAM,ACT3_LIMPO,ACT4_ARTSX,ACT5_CHICK,ACT5_XENLA	41 822,7	1	1	2	7	0.000278	0.197	AGFAGDDAPR	K	A	0.997	3.12	0.259	976.448
EC_212270_T33Vspike_4_B	Actin-5C OS=Drosophila melanogaster GN=Act5C PE=1 SV=4	ACT1_DROME,ACT3A_HELAM,ACT3_LIMPO,ACT4_ARTSX,ACT5_CHICK,ACT5_XENLA	41 822,7	1	1	2	7	0.000278	0.197	AVFPSIVGRPR	R	H	0.954	2.87	0.344	1 198,7055
EC_212270_T33Vspike_4_B	Actin-5C OS=Drosophila melanogaster GN=Act5C PE=1 SV=4	ACT1_DROME,ACT3A_HELAM,ACT3_LIMPO,ACT4_ARTSX,ACT5_CHICK,ACT5_XENLA	41 822,7	1	1	2	7	0.000278	0.197	HQGVMVGMGQKDSYVGDEAQSK	R	R	0.982	2.92	0.34	2 351,0757
EC_212270_T33Vspike_4_B	Actin-5C OS=Drosophila melanogaster GN=Act5C PE=1 SV=4	ACT1_DROME,ACT3A_HELAM,ACT3_LIMPO,ACT4_ARTSX,ACT5_CHICK,ACT5_XENLA	41 822,7	1	1	2	7	0.000278	0.197	HQGVMVGMGQKDSYVGDEAQSKR	R	G	0.995	3.67	0.0837	2 507,1768
EC_212270_T33Vspike_4_B	Actin-5C OS=Drosophila melanogaster GN=Act5C PE=1 SV=4	ACT1_DROME,ACT3A_HELAM,ACT3_LIMPO,ACT4_ARTSX,ACT5_CHICK,ACT5_XENLA	41 822,7	1	1	2	7	0.000278	0.197	MQKEITALAPSTMK	R	I	0.997	3.64	0.373	1 548,8126
EC_212270_T33Vspike_4_B	Actin-5C OS=Drosophila melanogaster GN=Act5C PE=1 SV=4	ACT1_DROME,ACT3A_HELAM,ACT3_LIMPO,ACT4_ARTSX,ACT5_CHICK,ACT5_XENLA	41 822,7	1	1	2	7	0.000278	0.197	SYELPDGQVITIGNER	K	F	0.971	2.84	0.399	1 790,8921
EC_212270_T33Vspike_11_A	Actin, cytoplasmic type 5 OS=Gallus gallus PE=3 SV=1	ACT5_CHICK,ACT5_XENLA	41 836,9	1	0	0	3	0.000139	0.16	AGFAGDDAPR	K	A	0.997	2.93	0.214	976.448
EC_212270_T33Vspike_11_A	Actin, cytoplasmic type 5 OS=Gallus gallus PE=3 SV=1	ACT5_CHICK,ACT5_XENLA	41 836,9	1	0	0	3	0.000139	0.16	AGFAGDDAPRAVFPSIVGRPR	K	H	0.997	4.27	0.385	2 156,1361
EC_212270_T33Vspike_11_A	Actin, cytoplasmic type 5 OS=Gallus gallus PE=3 SV=1	ACT5_CHICK,ACT5_XENLA	41 836,9	1	0	0	3	0.000139	0.16	HQGVMVGMGQKDSYVGDEAQSKR	R	G	0.997	3.4	0.262	2 507,1768
EC_212270_T33Vspike_11_A	Actin, cytoplasmic type 5 OS=Gallus gallus PE=3 SV=1	ACT5_CHICK,ACT5_XENLA	41 836,9	1	0	0	3	0.000139	0.16	SYELPDGQVITIGNER	K	F	0.997	3.54	0.433	1 790,8921
EC_212270_T33Vspike_11_B	Actin, cytoplasmic type 5 OS=Gallus gallus PE=3 SV=1	ACT5_CHICK,ACT5_XENLA	41 836,9	1	1	1	3	0.00014	0.0931	AGFAGDDAPR	K	A	0.997	3.51	0.297	976.448
EC_212270_T33Vspike_11_B	Actin, cytoplasmic type 5 OS=Gallus gallus PE=3 SV=1	ACT5_CHICK,ACT5_XENLA	41 836,9	1	1	1	3	0.00014	0.0931	AGFAGDDAPRAVFPSIVGRPR	K	H	0.997	3.26	0.379	2 156,1361
EC_212270_T33Vspike_11_B	Actin, cytoplasmic type 5 OS=Gallus gallus PE=3 SV=1	ACT5_CHICK,ACT5_XENLA	41 836,9	1	1	1	3	0.00014	0.0931	MQKEITALAPSTMK	R	I	0.997	3.24	0.459	1 548,8126
EC_212270_T33Vspike_1_A	Adrenodoxin, mitochondrial OS=Homo sapiens GN=FDX1 PE=1 SV=1	ADX_HUMAN	19 393,1	0.997	2	2	2	8.61e-05	0.141	LGCQICLTK	R	S	0.963	2.28	0.359	1 092,5543
EC_212270_T33Vspike_1_A	Adrenodoxin, mitochondrial OS=Homo sapiens GN=FDX1 PE=1 SV=1	ADX_HUMAN	19 393,1	0.997	2	2	2	8.61e-05	0.141	SMDNMTVRVPETVADAR	K	Q	0.932	2.47	0.202	1 891,9001
EC_212270_T33Vspike_1_B	Adrenodoxin, mitochondrial OS=Homo sapiens GN=FDX1 PE=1 SV=1	ADX_HUMAN	19 393,1	1	2	2	3	0.000136	0.212	SMDNMTVRVPETVADAR	K	Q	0.997	2.7	0.122	1 891,9001
EC_212270_T33Vspike_1_B	Adrenodoxin, mitochondrial OS=Homo sapiens GN=FDX1 PE=1 SV=1	ADX_HUMAN	19 393,1	1	2	2	3	0.000136	0.212	SSSEDKITVHFINRDGETLTTK	R	G	0.961	2.6	0.311	2 478,2473
EC_212270_T33Vspike_7_A	Lectin OS=Oryza sativa subsp. japonica GN=Os04g0173800 PE=1 SV=1	AGI_ORYSJ	22 794,4	0.998	2	2	2	9.04e-05	0.348	CGKQAGGDKCPNNFCCSAGGYCGLGGNYCGSGCQSGGCYK	R	G	0.987	1.65	-0.00183	4 102,5586
EC_212270_T33Vspike_7_A	Lectin OS=Oryza sativa subsp. japonica GN=Os04g0173800 PE=1 SV=1	AGI_ORYSJ	22 794,4	0.998	2	2	2	9.04e-05	0.348	NANGELCPNNMCCSQWGYCGLGSEFCGNGCQSGACCPEK	R	R	0.862	1.78	0.651	4 221,5513
EC_212270_T33Vspike_7_A	Neuroblast differentiation-associated protein AHNAK OS=Homo sapiens GN=AHNAK PE=1 SV=2	AHNK_HUMAN	629 104,4	1	2	2	2	9.04e-05	0.00628	IKGDVPSVGLEGPDVDLQGPEAK	K	I	0.997	3.45	0.418	2 320,2036
EC_212270_T33Vspike_7_A	Neuroblast differentiation-associated protein AHNAK OS=Homo sapiens GN=AHNAK PE=1 SV=2	AHNK_HUMAN	629 104,4	1	2	2	2	9.04e-05	0.00628	ISMPDVDLHLKGPK	K	V	0.974	2.6	0.211	1 549,8410
EC_212270_T33Vspike_2_B	Proline-rich AKT1 substrate 1 OS=Homo sapiens GN=AKT1S1 PE=1 SV=1	AKTS1_HUMAN	27 383,6	0.991	2	2	2	8.71e-05	0.125	ALVLREAEDTQVFGDLPRPR	R	L	0.896	2.61	0.138	2 282,2254
EC_212270_T33Vspike_2_B	Proline-rich AKT1 substrate 1 OS=Homo sapiens GN=AKT1S1 PE=1 SV=1	AKTS1_HUMAN	27 383,6	0.991	2	2	2	8.71e-05	0.125	SLPVSVPVWGFK	K	E	0.917	2	0.41	1 315,7409
EC_212270_T33Vspike_7_B	Proline-rich AKT1 substrate 1 OS=Homo sapiens GN=AKT1S1 PE=1 SV=1	AKTS1_HUMAN	27 383,6	0.993	2	2	2	9.09e-05	0.125	ALVLREAEDTQVFGDLPRPR	R	L	0.975	2.86	0.325	2 282,2254
EC_212270_T33Vspike_7_B	Proline-rich AKT1 substrate 1 OS=Homo sapiens GN=AKT1S1 PE=1 SV=1	AKTS1_HUMAN	27 383,6	0.993	2	2	2	9.09e-05	0.125	SLPVSVPVWGFK	K	E	0.725	1.94	0.308	1 315,7409
EC_212270_T33Vspike_1_A	Serum albumin OS=Bos taurus GN=ALB PE=1 SV=4	ALBU_BOVIN	69 294,2	1	6	7	8	0.000344	0.124	AEFVEVTKLVTDLTK	K	V	0.968	3.71	0.193	1 692,9420
EC_212270_T33Vspike_1_A	Serum albumin OS=Bos taurus GN=ALB PE=1 SV=4	ALBU_BOVIN	69 294,2	1	6	7	8	0.000344	0.124	HLVDEPQNLIK	K	Q	0.903	2.29	0.381	1 305,7163
EC_212270_T33Vspike_1_A	Serum albumin OS=Bos taurus GN=ALB PE=1 SV=4	ALBU_BOVIN	69 294,2	1	6	7	8	0.000344	0.124	KVPQVSTPTLVEVSR	R	S	0.997	3.52	0.476	1 639,9378
EC_212270_T33Vspike_1_A	Serum albumin OS=Bos taurus GN=ALB PE=1 SV=4	ALBU_BOVIN	69 294,2	1	6	7	8	0.000344	0.124	LVNELTEFAK	K	T	0.918	2.31	0.231	1 163,6307
EC_212270_T33Vspike_1_A	Serum albumin OS=Bos taurus GN=ALB PE=1 SV=4	ALBU_BOVIN	69 294,2	1	6	7	8	0.000344	0.124	RHPEYAVSVLLR	R	L	0.997	4.68	0.45	1 439,8117
EC_212270_T33Vspike_1_A	Serum albumin OS=Bos taurus GN=ALB PE=1 SV=4	ALBU_BOVIN	69 294,2	1	6	7	8	0.000344	0.124	SLHTLFGDELCK	K	V	0.997	4.02	0.482	1 419,6939
EC_212270_T33Vspike_1_B	Serum albumin OS=Bos taurus GN=ALB PE=1 SV=4	ALBU_BOVIN	69 294,2	1	8	11	12	0.000545	0.147	AEFVEVTKLVTDLTK	K	V	0.963	3.08	0.248	1 692,9420
EC_212270_T33Vspike_1_B	Serum albumin OS=Bos taurus GN=ALB PE=1 SV=4	ALBU_BOVIN	69 294,2	1	8	11	12	0.000545	0.147	HLVDEPQNLIK	K	Q	0.911	2.35	0.409	1 305,7163
EC_212270_T33Vspike_1_B	Serum albumin OS=Bos taurus GN=ALB PE=1 SV=4	ALBU_BOVIN	69 294,2	1	8	11	12	0.000545	0.147	KQTALVELLK	K	H	0.823	2.25	0.142	1 142,7145
EC_212270_T33Vspike_1_B	Serum albumin OS=Bos taurus GN=ALB PE=1 SV=4	ALBU_BOVIN	69 294,2	1	8	11	12	0.000545	0.147	KQTALVELLKHKPK	K	A	0.973	2.03	0.39	1 633,0162
EC_212270_T33Vspike_1_B	Serum albumin OS=Bos taurus GN=ALB PE=1 SV=4	ALBU_BOVIN	69 294,2	1	8	11	12	0.000545	0.147	KVPQVSTPTLVEVSR	R	S	0.967	2.89	0.34	1 639,9378
EC_212270_T33Vspike_1_B	Serum albumin OS=Bos taurus GN=ALB PE=1 SV=4	ALBU_BOVIN	69 294,2	1	8	11	12	0.000545	0.147	LVNELTEFAK	K	T	0.991	2.72	0.383	1 163,6307
EC_212270_T33Vspike_1_B	Serum albumin OS=Bos taurus GN=ALB PE=1 SV=4	ALBU_BOVIN	69 294,2	1	8	11	12	0.000545	0.147	RHPEYAVSVLLR	R	L	0.997	4.51	0.349	1 439,8117
EC_212270_T33Vspike_1_B	Serum albumin OS=Bos taurus GN=ALB PE=1 SV=4	ALBU_BOVIN	69 294,2	1	8	11	12	0.000545	0.147	SLHTLFGDELCK	K	V	0.997	3.77	0.441	1 419,6939
EC_212270_T33Vspike_2_A	Serum albumin OS=Bos taurus GN=ALB PE=1 SV=4	ALBU_BOVIN	69 294,2	1	9	13	39	0.00163	0.351	AEFVEVTKLVTDLTK	K	V	0.997	3.9	0.38	1 692,9420
EC_212270_T33Vspike_2_A	Serum albumin OS=Bos taurus GN=ALB PE=1 SV=4	ALBU_BOVIN	69 294,2	1	9	13	39	0.00163	0.351	AFDEKLFTFHADICTLPDTEKQIK	K	K	0.997	3.63	0.478	2 867,4289
EC_212270_T33Vspike_2_A	Serum albumin OS=Bos taurus GN=ALB PE=1 SV=4	ALBU_BOVIN	69 294,2	1	9	13	39	0.00163	0.351	ALKAWSVAR	R	L	0.894	2.58	0.18	1 001,5890
EC_212270_T33Vspike_2_A	Serum albumin OS=Bos taurus GN=ALB PE=1 SV=4	ALBU_BOVIN	69 294,2	1	9	13	39	0.00163	0.351	DAFLGSFLYEYSR	K	R	0.997	3.46	0.458	1 567,7427
EC_212270_T33Vspike_2_A	Serum albumin OS=Bos taurus GN=ALB PE=1 SV=4	ALBU_BOVIN	69 294,2	1	9	13	39	0.00163	0.351	HLVDEPQNLIK	K	Q	0.988	2.56	0.44	1 305,7163
EC_212270_T33Vspike_2_A	Serum albumin OS=Bos taurus GN=ALB PE=1 SV=4	ALBU_BOVIN	69 294,2	1	9	13	39	0.00163	0.351	HLVDEPQNLIKQNCDQFEK	K	L	0.997	3.39	0.41	2 355,1401
EC_212270_T33Vspike_2_A	Serum albumin OS=Bos taurus GN=ALB PE=1 SV=4	ALBU_BOVIN	69 294,2	1	9	13	39	0.00163	0.351	KQTALVELLK	K	H	0.993	3.1	0.371	1 142,7145
EC_212270_T33Vspike_2_A	Serum albumin OS=Bos taurus GN=ALB PE=1 SV=4	ALBU_BOVIN	69 294,2	1	9	13	39	0.00163	0.351	KQTALVELLKHKPK	K	A	0.982	2.38	0.442	1 633,0162
EC_212270_T33Vspike_2_A	Serum albumin OS=Bos taurus GN=ALB PE=1 SV=4	ALBU_BOVIN	69 294,2	1	9	13	39	0.00163	0.351	KVPQVSTPTLVEVSR	R	S	0.997	4.26	0.416	1 639,9378
EC_212270_T33Vspike_2_A	Serum albumin OS=Bos taurus GN=ALB PE=1 SV=4	ALBU_BOVIN	69 294,2	1	9	13	39	0.00163	0.351	LCVLHEKTPVSEKVTK	R	C	0.971	2.91	0.388	1 868,0312
EC_212270_T33Vspike_2_A	Serum albumin OS=Bos taurus GN=ALB PE=1 SV=4	ALBU_BOVIN	69 294,2	1	9	13	39	0.00163	0.351	LVVSTQTALA	K	-	0.965	2.41	0.421	1 002,5830
EC_212270_T33Vspike_2_A	Serum albumin OS=Bos taurus GN=ALB PE=1 SV=4	ALBU_BOVIN	69 294,2	1	9	13	39	0.00163	0.351	MPCTEDYLSLILNR	R	L	0.997	4.48	0.586	1 724,8348
EC_212270_T33Vspike_2_A	Serum albumin OS=Bos taurus GN=ALB PE=1 SV=4	ALBU_BOVIN	69 294,2	1	9	13	39	0.00163	0.351	QNCDQFEKLGEYGFQNALIVR	K	Y	0.988	3.33	0.332	2 529,2193
EC_212270_T33Vspike_2_A	Serum albumin OS=Bos taurus GN=ALB PE=1 SV=4	ALBU_BOVIN	69 294,2	1	9	13	39	0.00163	0.351	RHPEYAVSVLLR	R	L	0.997	4.86	0.461	1 439,8117
EC_212270_T33Vspike_2_A	Serum albumin OS=Bos taurus GN=ALB PE=1 SV=4	ALBU_BOVIN	69 294,2	1	9	13	39	0.00163	0.351	SLHTLFGDELCK	K	V	0.997	3.55	0.329	1 419,6939
EC_212270_T33Vspike_2_A	Serum albumin OS=Bos taurus GN=ALB PE=1 SV=4	ALBU_BOVIN	69 294,2	1	9	13	39	0.00163	0.351	TPVSEKVTK	K	C	0.87	2.57	0.283	988.567
EC_212270_T33Vspike_2_A	Serum albumin OS=Bos taurus GN=ALB PE=1 SV=4	ALBU_BOVIN	69 294,2	1	9	13	39	0.00163	0.351	TVMENFVAFVDK	K	C	0.997	3.33	0.466	1 399,6926
EC_212270_T33Vspike_2_A	Serum albumin OS=Bos taurus GN=ALB PE=1 SV=4	ALBU_BOVIN	69 294,2	1	9	13	39	0.00163	0.351	YICDNQDTISSK	K	L	0.896	2.61	0.332	1 443,6422
EC_212270_T33Vspike_2_A	Serum albumin OS=Bos taurus GN=ALB PE=1 SV=4	ALBU_BOVIN	69 294,2	1	9	13	39	0.00163	0.351	YTRKVPQVSTPTLVEVSR	R	S	0.968	3.07	0.245	2 060,1499
EC_212270_T33Vspike_2_B	Serum albumin OS=Bos taurus GN=ALB PE=1 SV=4	ALBU_BOVIN	69 294,2	1	12	14	39	0.0017	0.402	AEFVEVTKLVTDLTK	K	V	0.997	4.36	0.357	1 692,9420
EC_212270_T33Vspike_2_B	Serum albumin OS=Bos taurus GN=ALB PE=1 SV=4	ALBU_BOVIN	69 294,2	1	12	14	39	0.0017	0.402	AFDEKLFTFHADICTLPDTEKQIK	K	K	0.997	3.54	0.435	2 867,4289
EC_212270_T33Vspike_2_B	Serum albumin OS=Bos taurus GN=ALB PE=1 SV=4	ALBU_BOVIN	69 294,2	1	12	14	39	0.0017	0.402	ALKAWSVAR	R	L	0.969	2.61	0.236	1 001,5890
EC_212270_T33Vspike_2_B	Serum albumin OS=Bos taurus GN=ALB PE=1 SV=4	ALBU_BOVIN	69 294,2	1	12	14	39	0.0017	0.402	CCTESLVNRRPCFSALTPDETYVPK	K	A	0.838	2.49	0.239	3 000,4014
EC_212270_T33Vspike_2_B	Serum albumin OS=Bos taurus GN=ALB PE=1 SV=4	ALBU_BOVIN	69 294,2	1	12	14	39	0.0017	0.402	CCTKPESERMPCTEDYLSLILNR	R	L	0.967	2.69	0.272	2 888,3049
EC_212270_T33Vspike_2_B	Serum albumin OS=Bos taurus GN=ALB PE=1 SV=4	ALBU_BOVIN	69 294,2	1	12	14	39	0.0017	0.402	FKDLGEEHFK	R	G	0.843	2.04	0.111	1 249,6213
EC_212270_T33Vspike_2_B	Serum albumin OS=Bos taurus GN=ALB PE=1 SV=4	ALBU_BOVIN	69 294,2	1	12	14	39	0.0017	0.402	HLVDEPQNLIK	K	Q	0.97	2.73	0.422	1 305,7163
EC_212270_T33Vspike_2_B	Serum albumin OS=Bos taurus GN=ALB PE=1 SV=4	ALBU_BOVIN	69 294,2	1	12	14	39	0.0017	0.402	HLVDEPQNLIKQNCDQFEK	K	L	0.975	3.07	0.383	2 355,1401
EC_212270_T33Vspike_2_B	Serum albumin OS=Bos taurus GN=ALB PE=1 SV=4	ALBU_BOVIN	69 294,2	1	12	14	39	0.0017	0.402	KQTALVELLK	K	H	0.939	2.66	0.345	1 142,7145
EC_212270_T33Vspike_2_B	Serum albumin OS=Bos taurus GN=ALB PE=1 SV=4	ALBU_BOVIN	69 294,2	1	12	14	39	0.0017	0.402	KQTALVELLKHKPK	K	A	0.952	2.28	0.439	1 633,0162
EC_212270_T33Vspike_2_B	Serum albumin OS=Bos taurus GN=ALB PE=1 SV=4	ALBU_BOVIN	69 294,2	1	12	14	39	0.0017	0.402	KVPQVSTPTLVEVSR	R	S	0.997	4.11	0.44	1 639,9378
EC_212270_T33Vspike_2_B	Serum albumin OS=Bos taurus GN=ALB PE=1 SV=4	ALBU_BOVIN	69 294,2	1	12	14	39	0.0017	0.402	LCVLHEKTPVSEKVTK	R	C	0.997	2.83	0.53	1 868,0312
EC_212270_T33Vspike_2_B	Serum albumin OS=Bos taurus GN=ALB PE=1 SV=4	ALBU_BOVIN	69 294,2	1	12	14	39	0.0017	0.402	LVVSTQTALA	K	-	0.904	2.38	0.361	1 002,5830
EC_212270_T33Vspike_2_B	Serum albumin OS=Bos taurus GN=ALB PE=1 SV=4	ALBU_BOVIN	69 294,2	1	12	14	39	0.0017	0.402	MPCTEDYLSLILNR	R	L	0.997	3.56	0.368	1 724,8348
EC_212270_T33Vspike_2_B	Serum albumin OS=Bos taurus GN=ALB PE=1 SV=4	ALBU_BOVIN	69 294,2	1	12	14	39	0.0017	0.402	QNCDQFEKLGEYGFQNALIVR	K	Y	0.901	3.41	0.316	2 529,2193
EC_212270_T33Vspike_2_B	Serum albumin OS=Bos taurus GN=ALB PE=1 SV=4	ALBU_BOVIN	69 294,2	1	12	14	39	0.0017	0.402	RHPEYAVSVLLR	R	L	0.997	4.99	0.457	1 439,8117
EC_212270_T33Vspike_2_B	Serum albumin OS=Bos taurus GN=ALB PE=1 SV=4	ALBU_BOVIN	69 294,2	1	12	14	39	0.0017	0.402	SLHTLFGDELCK	K	V	0.997	4.31	0.453	1 419,6939
EC_212270_T33Vspike_2_B	Serum albumin OS=Bos taurus GN=ALB PE=1 SV=4	ALBU_BOVIN	69 294,2	1	12	14	39	0.0017	0.402	TVMENFVAFVDK	K	C	0.974	2.81	0.372	1 399,6926
EC_212270_T33Vspike_2_B	Serum albumin OS=Bos taurus GN=ALB PE=1 SV=4	ALBU_BOVIN	69 294,2	1	12	14	39	0.0017	0.402	VPQVSTPTLVEVSR	K	S	0.997	3.53	0.575	1 511,8428
EC_212270_T33Vspike_2_B	Serum albumin OS=Bos taurus GN=ALB PE=1 SV=4	ALBU_BOVIN	69 294,2	1	12	14	39	0.0017	0.402	YICDNQDTISSK	K	L	0.967	2.52	0.278	1 443,6422
EC_212270_T33Vspike_2_B	Serum albumin OS=Bos taurus GN=ALB PE=1 SV=4	ALBU_BOVIN	69 294,2	1	12	14	39	0.0017	0.402	YTRKVPQVSTPTLVEVSR	R	S	0.988	3.01	0.356	2 060,1499
EC_212270_T33Vspike_3_A	Serum albumin OS=Bos taurus GN=ALB PE=1 SV=4	ALBU_BOVIN	69 294,2	1	10	13	23	0.00116	0.249	AEFVEVTKLVTDLTK	K	V	0.513	2.63	0.102	1 692,9420
EC_212270_T33Vspike_3_A	Serum albumin OS=Bos taurus GN=ALB PE=1 SV=4	ALBU_BOVIN	69 294,2	1	10	13	23	0.00116	0.249	AFDEKLFTFHADICTLPDTEKQIK	K	K	0.863	2.37	0.324	2 867,4289
EC_212270_T33Vspike_3_A	Serum albumin OS=Bos taurus GN=ALB PE=1 SV=4	ALBU_BOVIN	69 294,2	1	10	13	23	0.00116	0.249	ATEEQLKTVMENFVAFVDK	K	C	0.137	2.2	0.212	2 199,1003
EC_212270_T33Vspike_3_A	Serum albumin OS=Bos taurus GN=ALB PE=1 SV=4	ALBU_BOVIN	69 294,2	1	10	13	23	0.00116	0.249	DAFLGSFLYEYSR	K	R	0.997	3.29	0.275	1 567,7427
EC_212270_T33Vspike_3_A	Serum albumin OS=Bos taurus GN=ALB PE=1 SV=4	ALBU_BOVIN	69 294,2	1	10	13	23	0.00116	0.249	HLVDEPQNLIK	K	Q	0.407	1.75	0.189	1 305,7163
EC_212270_T33Vspike_3_A	Serum albumin OS=Bos taurus GN=ALB PE=1 SV=4	ALBU_BOVIN	69 294,2	1	10	13	23	0.00116	0.249	KQTALVELLKHKPK	K	A	0.336	1.73	0.15	1 633,0162
EC_212270_T33Vspike_3_A	Serum albumin OS=Bos taurus GN=ALB PE=1 SV=4	ALBU_BOVIN	69 294,2	1	10	13	23	0.00116	0.249	KVPQVSTPTLVEVSR	R	S	0.918	3.01	0.268	1 639,9378
EC_212270_T33Vspike_3_A	Serum albumin OS=Bos taurus GN=ALB PE=1 SV=4	ALBU_BOVIN	69 294,2	1	10	13	23	0.00116	0.249	LCVLHEKTPVSEKVTK	R	C	0.958	3.02	0.375	1 811,0097
EC_212270_T33Vspike_3_A	Serum albumin OS=Bos taurus GN=ALB PE=1 SV=4	ALBU_BOVIN	69 294,2	1	10	13	23	0.00116	0.249	RHPEYAVSVLLR	R	L	0.997	4.65	0.346	1 439,8117
EC_212270_T33Vspike_3_A	Serum albumin OS=Bos taurus GN=ALB PE=1 SV=4	ALBU_BOVIN	69 294,2	1	10	13	23	0.00116	0.249	SLHTLFGDELCK	K	V	0.793	2.39	0.269	1 362,6724
EC_212270_T33Vspike_3_B	Serum albumin OS=Bos taurus GN=ALB PE=1 SV=4	ALBU_BOVIN	69 294,2	1	8	11	15	0.000787	0.165	AEFVEVTKLVTDLTK	K	V	0.918	3.1	0.102	1 692,9420
EC_212270_T33Vspike_3_B	Serum albumin OS=Bos taurus GN=ALB PE=1 SV=4	ALBU_BOVIN	69 294,2	1	8	11	15	0.000787	0.165	DAFLGSFLYEYSR	K	R	0.997	3.68	0.452	1 567,7427
EC_212270_T33Vspike_3_B	Serum albumin OS=Bos taurus GN=ALB PE=1 SV=4	ALBU_BOVIN	69 294,2	1	8	11	15	0.000787	0.165	HLVDEPQNLIK	K	Q	0.092	1.56	0.0498	1 305,7163
EC_212270_T33Vspike_3_B	Serum albumin OS=Bos taurus GN=ALB PE=1 SV=4	ALBU_BOVIN	69 294,2	1	8	11	15	0.000787	0.165	KVPQVSTPTLVEVSR	R	S	0.997	3.13	0.335	1 639,9378
EC_212270_T33Vspike_3_B	Serum albumin OS=Bos taurus GN=ALB PE=1 SV=4	ALBU_BOVIN	69 294,2	1	8	11	15	0.000787	0.165	LKECCDKPLLEK	K	S	0.552	2.18	0.161	1 475,7600
EC_212270_T33Vspike_3_B	Serum albumin OS=Bos taurus GN=ALB PE=1 SV=4	ALBU_BOVIN	69 294,2	1	8	11	15	0.000787	0.165	LVNELTEFAK	K	T	0.385	1.72	0.206	1 163,6307
EC_212270_T33Vspike_3_B	Serum albumin OS=Bos taurus GN=ALB PE=1 SV=4	ALBU_BOVIN	69 294,2	1	8	11	15	0.000787	0.165	RHPEYAVSVLLR	R	L	0.997	4.55	0.362	1 439,8117
EC_212270_T33Vspike_3_B	Serum albumin OS=Bos taurus GN=ALB PE=1 SV=4	ALBU_BOVIN	69 294,2	1	8	11	15	0.000787	0.165	SLHTLFGDELCK	K	V	0.997	3.78	0.476	1 419,6939
EC_212270_T33Vspike_4_A	Serum albumin OS=Bos taurus GN=ALB PE=1 SV=4	ALBU_BOVIN	69 294,2	1	19	28	35	0.00141	0.354	AEFVEVTKLVTDLTK	K	V	0.997	4.7	0.363	1 692,9420
EC_212270_T33Vspike_4_A	Serum albumin OS=Bos taurus GN=ALB PE=1 SV=4	ALBU_BOVIN	69 294,2	1	19	28	35	0.00141	0.354	AFDEKLFTFHADICTLPDTEKQIK	K	K	0.997	3.49	0.491	2 867,4289
EC_212270_T33Vspike_4_A	Serum albumin OS=Bos taurus GN=ALB PE=1 SV=4	ALBU_BOVIN	69 294,2	1	19	28	35	0.00141	0.354	ATEEQLKTVMENFVAFVDK	K	C	0.948	2.88	0.342	2 199,1003
EC_212270_T33Vspike_4_A	Serum albumin OS=Bos taurus GN=ALB PE=1 SV=4	ALBU_BOVIN	69 294,2	1	19	28	35	0.00141	0.354	CCTKPESERMPCTEDYLSLILNR	R	L	0.997	3.71	0.531	2 872,3099
EC_212270_T33Vspike_4_A	Serum albumin OS=Bos taurus GN=ALB PE=1 SV=4	ALBU_BOVIN	69 294,2	1	19	28	35	0.00141	0.354	DAFLGSFLYEYSR	K	R	0.997	3.18	0.374	1 567,7427
EC_212270_T33Vspike_4_A	Serum albumin OS=Bos taurus GN=ALB PE=1 SV=4	ALBU_BOVIN	69 294,2	1	19	28	35	0.00141	0.354	FKDLGEEHFK	R	G	0.956	2.49	0.178	1 249,6213
EC_212270_T33Vspike_4_A	Serum albumin OS=Bos taurus GN=ALB PE=1 SV=4	ALBU_BOVIN	69 294,2	1	19	28	35	0.00141	0.354	HLVDEPQNLIK	K	Q	0.968	2.56	0.467	1 305,7163
EC_212270_T33Vspike_4_A	Serum albumin OS=Bos taurus GN=ALB PE=1 SV=4	ALBU_BOVIN	69 294,2	1	19	28	35	0.00141	0.354	HLVDEPQNLIKQNCDQFEK	K	L	0.991	3.39	0.443	2 355,1401
EC_212270_T33Vspike_4_A	Serum albumin OS=Bos taurus GN=ALB PE=1 SV=4	ALBU_BOVIN	69 294,2	1	19	28	35	0.00141	0.354	HLVDEPQNLIKQNCDQFEKLGEYGFQNALIVR	K	Y	0.932	3.34	0.262	3 815,9178
EC_212270_T33Vspike_4_A	Serum albumin OS=Bos taurus GN=ALB PE=1 SV=4	ALBU_BOVIN	69 294,2	1	19	28	35	0.00141	0.354	KQTALVELLK	K	H	0.981	3.13	0.369	1 142,7145
EC_212270_T33Vspike_4_A	Serum albumin OS=Bos taurus GN=ALB PE=1 SV=4	ALBU_BOVIN	69 294,2	1	19	28	35	0.00141	0.354	KQTALVELLKHKPK	K	A	0.97	2.3	0.394	1 633,0162
EC_212270_T33Vspike_4_A	Serum albumin OS=Bos taurus GN=ALB PE=1 SV=4	ALBU_BOVIN	69 294,2	1	19	28	35	0.00141	0.354	KVPQVSTPTLVEVSR	R	S	0.997	3.99	0.496	1 639,9378
EC_212270_T33Vspike_4_A	Serum albumin OS=Bos taurus GN=ALB PE=1 SV=4	ALBU_BOVIN	69 294,2	1	19	28	35	0.00141	0.354	LCVLHEKTPVSEKVTK	R	C	0.967	3.03	0.399	1 868,0312
EC_212270_T33Vspike_4_A	Serum albumin OS=Bos taurus GN=ALB PE=1 SV=4	ALBU_BOVIN	69 294,2	1	19	28	35	0.00141	0.354	LFTFHADICTLPDTEKQIK	K	K	0.99	3.25	0.341	2 277,1588
EC_212270_T33Vspike_4_A	Serum albumin OS=Bos taurus GN=ALB PE=1 SV=4	ALBU_BOVIN	69 294,2	1	19	28	35	0.00141	0.354	LVVSTQTALA	K	-	0.935	2.43	0.325	1 002,5830
EC_212270_T33Vspike_4_A	Serum albumin OS=Bos taurus GN=ALB PE=1 SV=4	ALBU_BOVIN	69 294,2	1	19	28	35	0.00141	0.354	MPCTEDYLSLILNR	R	L	0.997	4.52	0.535	1 724,8348
EC_212270_T33Vspike_4_A	Serum albumin OS=Bos taurus GN=ALB PE=1 SV=4	ALBU_BOVIN	69 294,2	1	19	28	35	0.00141	0.354	RHPEYAVSVLLR	R	L	0.997	5.04	0.448	1 439,8117
EC_212270_T33Vspike_4_A	Serum albumin OS=Bos taurus GN=ALB PE=1 SV=4	ALBU_BOVIN	69 294,2	1	19	28	35	0.00141	0.354	SLHTLFGDELCK	K	V	0.997	4.42	0.478	1 419,6939
EC_212270_T33Vspike_4_A	Serum albumin OS=Bos taurus GN=ALB PE=1 SV=4	ALBU_BOVIN	69 294,2	1	19	28	35	0.00141	0.354	VPQVSTPTLVEVSR	K	S	0.997	3.2	0.551	1 511,8428
EC_212270_T33Vspike_4_B	Serum albumin OS=Bos taurus GN=ALB PE=1 SV=4	ALBU_BOVIN	69 294,2	1	20	31	37	0.00147	0.348	AEFVEVTKLVTDLTK	K	V	0.997	4.38	0.334	1 692,9420
EC_212270_T33Vspike_4_B	Serum albumin OS=Bos taurus GN=ALB PE=1 SV=4	ALBU_BOVIN	69 294,2	1	20	31	37	0.00147	0.348	AFDEKLFTFHADICTLPDTEK	K	Q	0.997	4.09	0.422	2 498,1912
EC_212270_T33Vspike_4_B	Serum albumin OS=Bos taurus GN=ALB PE=1 SV=4	ALBU_BOVIN	69 294,2	1	20	31	37	0.00147	0.348	AFDEKLFTFHADICTLPDTEKQIK	K	K	0.997	4.35	0.407	2 867,4289
EC_212270_T33Vspike_4_B	Serum albumin OS=Bos taurus GN=ALB PE=1 SV=4	ALBU_BOVIN	69 294,2	1	20	31	37	0.00147	0.348	ALKAWSVAR	R	L	0.946	2.34	0.323	1 001,5890
EC_212270_T33Vspike_4_B	Serum albumin OS=Bos taurus GN=ALB PE=1 SV=4	ALBU_BOVIN	69 294,2	1	20	31	37	0.00147	0.348	ATEEQLKTVMENFVAFVDK	K	C	0.997	3.4	0.373	2 199,1003
EC_212270_T33Vspike_4_B	Serum albumin OS=Bos taurus GN=ALB PE=1 SV=4	ALBU_BOVIN	69 294,2	1	20	31	37	0.00147	0.348	CCTKPESERMPCTEDYLSLILNR	R	L	0.96	2.85	0.403	2 872,3099
EC_212270_T33Vspike_4_B	Serum albumin OS=Bos taurus GN=ALB PE=1 SV=4	ALBU_BOVIN	69 294,2	1	20	31	37	0.00147	0.348	DAFLGSFLYEYSR	K	R	0.997	3.1	0.336	1 567,7427
EC_212270_T33Vspike_4_B	Serum albumin OS=Bos taurus GN=ALB PE=1 SV=4	ALBU_BOVIN	69 294,2	1	20	31	37	0.00147	0.348	FKDLGEEHFK	R	G	0.997	3.2	0.166	1 249,6213
EC_212270_T33Vspike_4_B	Serum albumin OS=Bos taurus GN=ALB PE=1 SV=4	ALBU_BOVIN	69 294,2	1	20	31	37	0.00147	0.348	HLVDEPQNLIK	K	Q	0.939	2.34	0.395	1 305,7163
EC_212270_T33Vspike_4_B	Serum albumin OS=Bos taurus GN=ALB PE=1 SV=4	ALBU_BOVIN	69 294,2	1	20	31	37	0.00147	0.348	HLVDEPQNLIKQNCDQFEK	K	L	0.962	3.4	0.431	2 355,1401
EC_212270_T33Vspike_4_B	Serum albumin OS=Bos taurus GN=ALB PE=1 SV=4	ALBU_BOVIN	69 294,2	1	20	31	37	0.00147	0.348	KQTALVELLK	K	H	0.997	3.44	0.367	1 142,7145
EC_212270_T33Vspike_4_B	Serum albumin OS=Bos taurus GN=ALB PE=1 SV=4	ALBU_BOVIN	69 294,2	1	20	31	37	0.00147	0.348	KQTALVELLKHKPK	K	A	0.997	2.91	0.569	1 633,0162
EC_212270_T33Vspike_4_B	Serum albumin OS=Bos taurus GN=ALB PE=1 SV=4	ALBU_BOVIN	69 294,2	1	20	31	37	0.00147	0.348	KVPQVSTPTLVEVSR	R	S	0.972	3.19	0.306	1 639,9378
EC_212270_T33Vspike_4_B	Serum albumin OS=Bos taurus GN=ALB PE=1 SV=4	ALBU_BOVIN	69 294,2	1	20	31	37	0.00147	0.348	LCVLHEKTPVSEKVTK	R	C	0.997	3.08	0.347	1 868,0312
EC_212270_T33Vspike_4_B	Serum albumin OS=Bos taurus GN=ALB PE=1 SV=4	ALBU_BOVIN	69 294,2	1	20	31	37	0.00147	0.348	LFTFHADICTLPDTEKQIK	K	K	0.983	3.44	0.362	2 277,1588
EC_212270_T33Vspike_4_B	Serum albumin OS=Bos taurus GN=ALB PE=1 SV=4	ALBU_BOVIN	69 294,2	1	20	31	37	0.00147	0.348	LVVSTQTALA	K	-	0.94	2.64	0.343	1 002,5830
EC_212270_T33Vspike_4_B	Serum albumin OS=Bos taurus GN=ALB PE=1 SV=4	ALBU_BOVIN	69 294,2	1	20	31	37	0.00147	0.348	MPCTEDYLSLILNR	R	L	0.997	3.93	0.464	1 740,8297
EC_212270_T33Vspike_4_B	Serum albumin OS=Bos taurus GN=ALB PE=1 SV=4	ALBU_BOVIN	69 294,2	1	20	31	37	0.00147	0.348	RHPEYAVSVLLR	R	L	0.997	4.87	0.372	1 439,8117
EC_212270_T33Vspike_4_B	Serum albumin OS=Bos taurus GN=ALB PE=1 SV=4	ALBU_BOVIN	69 294,2	1	20	31	37	0.00147	0.348	SLHTLFGDELCK	K	V	0.997	4.04	0.453	1 362,6724
EC_212270_T33Vspike_4_B	Serum albumin OS=Bos taurus GN=ALB PE=1 SV=4	ALBU_BOVIN	69 294,2	1	20	31	37	0.00147	0.348	VPQVSTPTLVEVSR	K	S	0.906	2.18	0.349	1 511,8428
EC_212270_T33Vspike_5_A	Serum albumin OS=Bos taurus GN=ALB PE=1 SV=4	ALBU_BOVIN	69 294,2	1	11	13	15	0.000634	0.213	AEFVEVTKLVTDLTK	K	V	0.933	3.28	0.182	1 692,9420
EC_212270_T33Vspike_5_A	Serum albumin OS=Bos taurus GN=ALB PE=1 SV=4	ALBU_BOVIN	69 294,2	1	11	13	15	0.000634	0.213	AFDEKLFTFHADICTLPDTEKQIK	K	K	0.958	2.96	0.295	2 867,4289
EC_212270_T33Vspike_5_A	Serum albumin OS=Bos taurus GN=ALB PE=1 SV=4	ALBU_BOVIN	69 294,2	1	11	13	15	0.000634	0.213	DAFLGSFLYEYSR	K	R	0.997	3.49	0.424	1 567,7427
EC_212270_T33Vspike_5_A	Serum albumin OS=Bos taurus GN=ALB PE=1 SV=4	ALBU_BOVIN	69 294,2	1	11	13	15	0.000634	0.213	HLVDEPQNLIK	K	Q	0.971	2.67	0.435	1 305,7163
EC_212270_T33Vspike_5_A	Serum albumin OS=Bos taurus GN=ALB PE=1 SV=4	ALBU_BOVIN	69 294,2	1	11	13	15	0.000634	0.213	KQTALVELLK	K	H	0.956	2.41	0.289	1 142,7145
EC_212270_T33Vspike_5_A	Serum albumin OS=Bos taurus GN=ALB PE=1 SV=4	ALBU_BOVIN	69 294,2	1	11	13	15	0.000634	0.213	KQTALVELLKHKPK	K	A	0.963	2.21	0.403	1 633,0162
EC_212270_T33Vspike_5_A	Serum albumin OS=Bos taurus GN=ALB PE=1 SV=4	ALBU_BOVIN	69 294,2	1	11	13	15	0.000634	0.213	KVPQVSTPTLVEVSR	R	S	0.997	3.96	0.449	1 639,9378
EC_212270_T33Vspike_5_A	Serum albumin OS=Bos taurus GN=ALB PE=1 SV=4	ALBU_BOVIN	69 294,2	1	11	13	15	0.000634	0.213	LVVSTQTALA	K	-	0.881	2.17	0.296	1 002,5830
EC_212270_T33Vspike_5_A	Serum albumin OS=Bos taurus GN=ALB PE=1 SV=4	ALBU_BOVIN	69 294,2	1	11	13	15	0.000634	0.213	RHPEYAVSVLLR	R	L	0.997	4.53	0.348	1 439,8117
EC_212270_T33Vspike_5_A	Serum albumin OS=Bos taurus GN=ALB PE=1 SV=4	ALBU_BOVIN	69 294,2	1	11	13	15	0.000634	0.213	SLHTLFGDELCK	K	V	0.997	3.94	0.466	1 419,6939
EC_212270_T33Vspike_5_A	Serum albumin OS=Bos taurus GN=ALB PE=1 SV=4	ALBU_BOVIN	69 294,2	1	11	13	15	0.000634	0.213	YTRKVPQVSTPTLVEVSR	R	S	0.96	3.24	0.313	2 060,1499
EC_212270_T33Vspike_5_B	Serum albumin OS=Bos taurus GN=ALB PE=1 SV=4	ALBU_BOVIN	69 294,2	1	10	13	16	0.000816	0.209	AFDEKLFTFHADICTLPDTEKQIK	K	K	0.954	3.17	0.273	2 867,4289
EC_212270_T33Vspike_5_B	Serum albumin OS=Bos taurus GN=ALB PE=1 SV=4	ALBU_BOVIN	69 294,2	1	10	13	16	0.000816	0.209	DAFLGSFLYEYSR	K	R	0.997	3.9	0.465	1 567,7427
EC_212270_T33Vspike_5_B	Serum albumin OS=Bos taurus GN=ALB PE=1 SV=4	ALBU_BOVIN	69 294,2	1	10	13	16	0.000816	0.209	HLVDEPQNLIK	K	Q	0.964	2.52	0.406	1 305,7163
EC_212270_T33Vspike_5_B	Serum albumin OS=Bos taurus GN=ALB PE=1 SV=4	ALBU_BOVIN	69 294,2	1	10	13	16	0.000816	0.209	KQTALVELLK	K	H	0.969	2.39	0.197	1 142,7145
EC_212270_T33Vspike_5_B	Serum albumin OS=Bos taurus GN=ALB PE=1 SV=4	ALBU_BOVIN	69 294,2	1	10	13	16	0.000816	0.209	KQTALVELLKHKPK	K	A	0.91	2.3	0.261	1 633,0162
EC_212270_T33Vspike_5_B	Serum albumin OS=Bos taurus GN=ALB PE=1 SV=4	ALBU_BOVIN	69 294,2	1	10	13	16	0.000816	0.209	KVPQVSTPTLVEVSR	R	S	0.972	3.01	0.199	1 639,9378
EC_212270_T33Vspike_5_B	Serum albumin OS=Bos taurus GN=ALB PE=1 SV=4	ALBU_BOVIN	69 294,2	1	10	13	16	0.000816	0.209	LCVLHEKTPVSEKVTK	R	C	0.974	2.93	0.366	1 811,0097
EC_212270_T33Vspike_5_B	Serum albumin OS=Bos taurus GN=ALB PE=1 SV=4	ALBU_BOVIN	69 294,2	1	10	13	16	0.000816	0.209	LVVSTQTALA	K	-	0.932	2.11	0.399	1 002,5830
EC_212270_T33Vspike_5_B	Serum albumin OS=Bos taurus GN=ALB PE=1 SV=4	ALBU_BOVIN	69 294,2	1	10	13	16	0.000816	0.209	RHPEYAVSVLLR	R	L	0.997	5.05	0.37	1 439,8117
EC_212270_T33Vspike_5_B	Serum albumin OS=Bos taurus GN=ALB PE=1 SV=4	ALBU_BOVIN	69 294,2	1	10	13	16	0.000816	0.209	SLHTLFGDELCK	K	V	0.997	3.33	0.379	1 362,6724
EC_212270_T33Vspike_6_A	Serum albumin OS=Bos taurus GN=ALB PE=1 SV=4	ALBU_BOVIN	69 294,2	1	8	9	11	0.000609	0.191	AEFVEVTKLVTDLTK	K	V	0.997	3.91	0.408	1 692,9420
EC_212270_T33Vspike_6_A	Serum albumin OS=Bos taurus GN=ALB PE=1 SV=4	ALBU_BOVIN	69 294,2	1	8	9	11	0.000609	0.191	ATEEQLKTVMENFVAFVDK	K	C	0.919	2.53	0.239	2 199,1003
EC_212270_T33Vspike_6_A	Serum albumin OS=Bos taurus GN=ALB PE=1 SV=4	ALBU_BOVIN	69 294,2	1	8	9	11	0.000609	0.191	DAFLGSFLYEYSR	K	R	0.997	3.57	0.474	1 567,7427
EC_212270_T33Vspike_6_A	Serum albumin OS=Bos taurus GN=ALB PE=1 SV=4	ALBU_BOVIN	69 294,2	1	8	9	11	0.000609	0.191	KVPQVSTPTLVEVSR	R	S	0.907	2.67	0.229	1 639,9378
EC_212270_T33Vspike_6_A	Serum albumin OS=Bos taurus GN=ALB PE=1 SV=4	ALBU_BOVIN	69 294,2	1	8	9	11	0.000609	0.191	LCVLHEKTPVSEKVTK	R	C	0.924	2.63	0.255	1 868,0312
EC_212270_T33Vspike_6_A	Serum albumin OS=Bos taurus GN=ALB PE=1 SV=4	ALBU_BOVIN	69 294,2	1	8	9	11	0.000609	0.191	MPCTEDYLSLILNR	R	L	0.997	3.34	0.423	1 724,8348
EC_212270_T33Vspike_6_A	Serum albumin OS=Bos taurus GN=ALB PE=1 SV=4	ALBU_BOVIN	69 294,2	1	8	9	11	0.000609	0.191	RHPEYAVSVLLR	R	L	0.997	4.13	0.316	1 439,8117
EC_212270_T33Vspike_6_A	Serum albumin OS=Bos taurus GN=ALB PE=1 SV=4	ALBU_BOVIN	69 294,2	1	8	9	11	0.000609	0.191	SLHTLFGDELCK	K	V	0.997	3.42	0.358	1 419,6939
EC_212270_T33Vspike_6_B	Serum albumin OS=Bos taurus GN=ALB PE=1 SV=4	ALBU_BOVIN	69 294,2	1	8	9	10	0.000599	0.204	AEFVEVTKLVTDLTK	K	V	0.997	4.24	0.379	1 692,9420
EC_212270_T33Vspike_6_B	Serum albumin OS=Bos taurus GN=ALB PE=1 SV=4	ALBU_BOVIN	69 294,2	1	8	9	10	0.000599	0.204	AFDEKLFTFHADICTLPDTEKQIK	K	K	0.997	3.4	0.349	2 810,4074
EC_212270_T33Vspike_6_B	Serum albumin OS=Bos taurus GN=ALB PE=1 SV=4	ALBU_BOVIN	69 294,2	1	8	9	10	0.000599	0.204	ATEEQLKTVMENFVAFVDK	K	C	0.997	2.95	0.34	2 199,1003
EC_212270_T33Vspike_6_B	Serum albumin OS=Bos taurus GN=ALB PE=1 SV=4	ALBU_BOVIN	69 294,2	1	8	9	10	0.000599	0.204	DAFLGSFLYEYSR	K	R	0.934	2.61	0.377	1 567,7427
EC_212270_T33Vspike_6_B	Serum albumin OS=Bos taurus GN=ALB PE=1 SV=4	ALBU_BOVIN	69 294,2	1	8	9	10	0.000599	0.204	KVPQVSTPTLVEVSR	R	S	0.997	4.21	0.419	1 639,9378
EC_212270_T33Vspike_6_B	Serum albumin OS=Bos taurus GN=ALB PE=1 SV=4	ALBU_BOVIN	69 294,2	1	8	9	10	0.000599	0.204	MPCTEDYLSLILNR	R	L	0.997	4.36	0.489	1 724,8348
EC_212270_T33Vspike_6_B	Serum albumin OS=Bos taurus GN=ALB PE=1 SV=4	ALBU_BOVIN	69 294,2	1	8	9	10	0.000599	0.204	RHPEYAVSVLLR	R	L	0.997	4.67	0.38	1 439,8117
EC_212270_T33Vspike_6_B	Serum albumin OS=Bos taurus GN=ALB PE=1 SV=4	ALBU_BOVIN	69 294,2	1	8	9	10	0.000599	0.204	SLHTLFGDELCK	K	V	0.997	2.98	0.262	1 362,6724
EC_212270_T33Vspike_7_A	Serum albumin OS=Bos taurus GN=ALB PE=1 SV=4	ALBU_BOVIN	69 294,2	1	7	8	11	0.000497	0.161	AEFVEVTKLVTDLTK	K	V	0.67	2.95	0.0371	1 692,9420
EC_212270_T33Vspike_7_A	Serum albumin OS=Bos taurus GN=ALB PE=1 SV=4	ALBU_BOVIN	69 294,2	1	7	8	11	0.000497	0.161	HLVDEPQNLIK	K	Q	0.954	2.57	0.417	1 305,7163
EC_212270_T33Vspike_7_A	Serum albumin OS=Bos taurus GN=ALB PE=1 SV=4	ALBU_BOVIN	69 294,2	1	7	8	11	0.000497	0.161	KQTALVELLKHKPK	K	A	0.981	2.72	0.336	1 633,0162
EC_212270_T33Vspike_7_A	Serum albumin OS=Bos taurus GN=ALB PE=1 SV=4	ALBU_BOVIN	69 294,2	1	7	8	11	0.000497	0.161	KVPQVSTPTLVEVSR	R	S	0.997	3.75	0.376	1 639,9378
EC_212270_T33Vspike_7_A	Serum albumin OS=Bos taurus GN=ALB PE=1 SV=4	ALBU_BOVIN	69 294,2	1	7	8	11	0.000497	0.161	LCVLHEKTPVSEKVTK	R	C	0.843	2.78	0.351	1 811,0097
EC_212270_T33Vspike_7_A	Serum albumin OS=Bos taurus GN=ALB PE=1 SV=4	ALBU_BOVIN	69 294,2	1	7	8	11	0.000497	0.161	RHPEYAVSVLLR	R	L	0.997	4.45	0.371	1 439,8117
EC_212270_T33Vspike_7_A	Serum albumin OS=Bos taurus GN=ALB PE=1 SV=4	ALBU_BOVIN	69 294,2	1	7	8	11	0.000497	0.161	SLHTLFGDELCK	K	V	0.997	4.33	0.486	1 419,6939
EC_212270_T33Vspike_7_A	Serum albumin OS=Bos taurus GN=ALB PE=1 SV=4	ALBU_BOVIN	69 294,2	1	7	8	11	0.000497	0.161	YTRKVPQVSTPTLVEVSR	R	S	0.822	2.55	0.203	2 060,1499
EC_212270_T33Vspike_7_B	Serum albumin OS=Bos taurus GN=ALB PE=1 SV=4	ALBU_BOVIN	69 294,2	1	8	10	15	0.000682	0.176	AEFVEVTKLVTDLTK	K	V	0.985	3.24	0.292	1 692,9420
EC_212270_T33Vspike_7_B	Serum albumin OS=Bos taurus GN=ALB PE=1 SV=4	ALBU_BOVIN	69 294,2	1	8	10	15	0.000682	0.176	HLVDEPQNLIK	K	Q	0.969	2.59	0.337	1 305,7163
EC_212270_T33Vspike_7_B	Serum albumin OS=Bos taurus GN=ALB PE=1 SV=4	ALBU_BOVIN	69 294,2	1	8	10	15	0.000682	0.176	KQTALVELLKHKPK	K	A	0.997	2.38	0.293	1 633,0162
EC_212270_T33Vspike_7_B	Serum albumin OS=Bos taurus GN=ALB PE=1 SV=4	ALBU_BOVIN	69 294,2	1	8	10	15	0.000682	0.176	KVPQVSTPTLVEVSR	R	S	0.997	4.15	0.477	1 639,9378
EC_212270_T33Vspike_7_B	Serum albumin OS=Bos taurus GN=ALB PE=1 SV=4	ALBU_BOVIN	69 294,2	1	8	10	15	0.000682	0.176	LCVLHEKTPVSEKVTK	R	C	0.761	2.38	0.279	1 811,0097
EC_212270_T33Vspike_7_B	Serum albumin OS=Bos taurus GN=ALB PE=1 SV=4	ALBU_BOVIN	69 294,2	1	8	10	15	0.000682	0.176	RHPEYAVSVLLR	R	L	0.997	5.03	0.463	1 439,8117
EC_212270_T33Vspike_7_B	Serum albumin OS=Bos taurus GN=ALB PE=1 SV=4	ALBU_BOVIN	69 294,2	1	8	10	15	0.000682	0.176	SLHTLFGDELCK	K	V	0.997	3.8	0.388	1 419,6939
EC_212270_T33Vspike_7_B	Serum albumin OS=Bos taurus GN=ALB PE=1 SV=4	ALBU_BOVIN	69 294,2	1	8	10	15	0.000682	0.176	VPQVSTPTLVEVSR	K	S	0.722	2	0.239	1 511,8428
EC_212270_T33Vspike_7_B	Serum albumin OS=Bos taurus GN=ALB PE=1 SV=4	ALBU_BOVIN	69 294,2	1	8	10	15	0.000682	0.176	YICDNQDTISSK	K	L	0.834	1.96	0.27	1 443,6422
EC_212270_T33Vspike_8_A	Serum albumin OS=Bos taurus GN=ALB PE=1 SV=4	ALBU_BOVIN	69 294,2	1	11	12	14	0.000657	0.267	AEFVEVTKLVTDLTK	K	V	0.874	2.61	0.219	1 692,9420
EC_212270_T33Vspike_8_A	Serum albumin OS=Bos taurus GN=ALB PE=1 SV=4	ALBU_BOVIN	69 294,2	1	11	12	14	0.000657	0.267	AFDEKLFTFHADICTLPDTEKQIK	K	K	0.992	3.2	0.34	2 867,4289
EC_212270_T33Vspike_8_A	Serum albumin OS=Bos taurus GN=ALB PE=1 SV=4	ALBU_BOVIN	69 294,2	1	11	12	14	0.000657	0.267	ATEEQLKTVMENFVAFVDK	K	C	0.933	3.6	0.458	2 199,1003
EC_212270_T33Vspike_8_A	Serum albumin OS=Bos taurus GN=ALB PE=1 SV=4	ALBU_BOVIN	69 294,2	1	11	12	14	0.000657	0.267	DAFLGSFLYEYSR	K	R	0.997	3.22	0.435	1 567,7427
EC_212270_T33Vspike_8_A	Serum albumin OS=Bos taurus GN=ALB PE=1 SV=4	ALBU_BOVIN	69 294,2	1	11	12	14	0.000657	0.267	KQTALVELLK	K	H	0.979	3.03	0.326	1 142,7145
EC_212270_T33Vspike_8_A	Serum albumin OS=Bos taurus GN=ALB PE=1 SV=4	ALBU_BOVIN	69 294,2	1	11	12	14	0.000657	0.267	KVPQVSTPTLVEVSR	R	S	0.997	3.53	0.381	1 639,9378
EC_212270_T33Vspike_8_A	Serum albumin OS=Bos taurus GN=ALB PE=1 SV=4	ALBU_BOVIN	69 294,2	1	11	12	14	0.000657	0.267	LCVLHEKTPVSEKVTK	R	C	0.997	3.41	0.371	1 811,0097
EC_212270_T33Vspike_8_A	Serum albumin OS=Bos taurus GN=ALB PE=1 SV=4	ALBU_BOVIN	69 294,2	1	11	12	14	0.000657	0.267	MPCTEDYLSLILNR	R	L	0.997	4.63	0.47	1 724,8348
EC_212270_T33Vspike_8_A	Serum albumin OS=Bos taurus GN=ALB PE=1 SV=4	ALBU_BOVIN	69 294,2	1	11	12	14	0.000657	0.267	RHPEYAVSVLLR	R	L	0.997	4.96	0.433	1 439,8117
EC_212270_T33Vspike_8_A	Serum albumin OS=Bos taurus GN=ALB PE=1 SV=4	ALBU_BOVIN	69 294,2	1	11	12	14	0.000657	0.267	SLHTLFGDELCK	K	V	0.997	4.04	0.477	1 419,6939
EC_212270_T33Vspike_8_A	Serum albumin OS=Bos taurus GN=ALB PE=1 SV=4	ALBU_BOVIN	69 294,2	1	11	12	14	0.000657	0.267	YICDNQDTISSK	K	L	0.926	2.26	0.212	1 443,6422
EC_212270_T33Vspike_8_B	Serum albumin OS=Bos taurus GN=ALB PE=1 SV=4	ALBU_BOVIN	69 294,2	1	14	16	18	0.000863	0.295	AEFVEVTKLVTDLTK	K	V	0.947	3.52	0.08	1 692,9420
EC_212270_T33Vspike_8_B	Serum albumin OS=Bos taurus GN=ALB PE=1 SV=4	ALBU_BOVIN	69 294,2	1	14	16	18	0.000863	0.295	AFDEKLFTFHADICTLPDTEKQIK	K	K	0.997	3.62	0.366	2 867,4289
EC_212270_T33Vspike_8_B	Serum albumin OS=Bos taurus GN=ALB PE=1 SV=4	ALBU_BOVIN	69 294,2	1	14	16	18	0.000863	0.295	ALKAWSVAR	R	L	0.985	2.73	0.302	1 001,5890
EC_212270_T33Vspike_8_B	Serum albumin OS=Bos taurus GN=ALB PE=1 SV=4	ALBU_BOVIN	69 294,2	1	14	16	18	0.000863	0.295	ATEEQLKTVMENFVAFVDK	K	C	0.938	2.56	0.258	2 199,1003
EC_212270_T33Vspike_8_B	Serum albumin OS=Bos taurus GN=ALB PE=1 SV=4	ALBU_BOVIN	69 294,2	1	14	16	18	0.000863	0.295	DAFLGSFLYEYSR	K	R	0.997	4.09	0.514	1 567,7427
EC_212270_T33Vspike_8_B	Serum albumin OS=Bos taurus GN=ALB PE=1 SV=4	ALBU_BOVIN	69 294,2	1	14	16	18	0.000863	0.295	HLVDEPQNLIK	K	Q	0.938	2.28	0.42	1 305,7163
EC_212270_T33Vspike_8_B	Serum albumin OS=Bos taurus GN=ALB PE=1 SV=4	ALBU_BOVIN	69 294,2	1	14	16	18	0.000863	0.295	KQTALVELLK	K	H	0.967	2.5	0.347	1 142,7145
EC_212270_T33Vspike_8_B	Serum albumin OS=Bos taurus GN=ALB PE=1 SV=4	ALBU_BOVIN	69 294,2	1	14	16	18	0.000863	0.295	KQTALVELLKHKPK	K	A	0.985	2.31	0.445	1 633,0162
EC_212270_T33Vspike_8_B	Serum albumin OS=Bos taurus GN=ALB PE=1 SV=4	ALBU_BOVIN	69 294,2	1	14	16	18	0.000863	0.295	KVPQVSTPTLVEVSR	R	S	0.997	3.68	0.455	1 639,9378
EC_212270_T33Vspike_8_B	Serum albumin OS=Bos taurus GN=ALB PE=1 SV=4	ALBU_BOVIN	69 294,2	1	14	16	18	0.000863	0.295	LCVLHEKTPVSEKVTK	R	C	0.997	3.33	0.397	1 811,0097
EC_212270_T33Vspike_8_B	Serum albumin OS=Bos taurus GN=ALB PE=1 SV=4	ALBU_BOVIN	69 294,2	1	14	16	18	0.000863	0.295	MPCTEDYLSLILNR	R	L	0.997	4.24	0.518	1 724,8348
EC_212270_T33Vspike_8_B	Serum albumin OS=Bos taurus GN=ALB PE=1 SV=4	ALBU_BOVIN	69 294,2	1	14	16	18	0.000863	0.295	RHPEYAVSVLLR	R	L	0.997	4.78	0.344	1 439,8117
EC_212270_T33Vspike_8_B	Serum albumin OS=Bos taurus GN=ALB PE=1 SV=4	ALBU_BOVIN	69 294,2	1	14	16	18	0.000863	0.295	SLHTLFGDELCK	K	V	0.997	3.41	0.423	1 419,6939
EC_212270_T33Vspike_8_B	Serum albumin OS=Bos taurus GN=ALB PE=1 SV=4	ALBU_BOVIN	69 294,2	1	14	16	18	0.000863	0.295	SLHTLFGDELCKVASLR	K	E	0.997	3.56	0.424	1 946,0166
EC_212270_T33Vspike_9_A	Serum albumin OS=Bos taurus GN=ALB PE=1 SV=4	ALBU_BOVIN	69 294,2	1	6	6	7	0.000339	0.124	AEFVEVTKLVTDLTK	K	V	0.92	2.74	0.266	1 692,9420
EC_212270_T33Vspike_9_A	Serum albumin OS=Bos taurus GN=ALB PE=1 SV=4	ALBU_BOVIN	69 294,2	1	6	6	7	0.000339	0.124	HLVDEPQNLIK	K	Q	0.935	2.36	0.409	1 305,7163
EC_212270_T33Vspike_9_A	Serum albumin OS=Bos taurus GN=ALB PE=1 SV=4	ALBU_BOVIN	69 294,2	1	6	6	7	0.000339	0.124	KQTALVELLK	K	H	0.951	2.58	0.263	1 142,7145
EC_212270_T33Vspike_9_A	Serum albumin OS=Bos taurus GN=ALB PE=1 SV=4	ALBU_BOVIN	69 294,2	1	6	6	7	0.000339	0.124	KVPQVSTPTLVEVSR	R	S	0.997	3.62	0.337	1 639,9378
EC_212270_T33Vspike_9_A	Serum albumin OS=Bos taurus GN=ALB PE=1 SV=4	ALBU_BOVIN	69 294,2	1	6	6	7	0.000339	0.124	RHPEYAVSVLLR	R	L	0.997	4.78	0.417	1 439,8117
EC_212270_T33Vspike_9_A	Serum albumin OS=Bos taurus GN=ALB PE=1 SV=4	ALBU_BOVIN	69 294,2	1	6	6	7	0.000339	0.124	SLHTLFGDELCK	K	V	0.919	2.02	0.244	1 362,6724
EC_212270_T33Vspike_9_B	Serum albumin OS=Bos taurus GN=ALB PE=1 SV=4	ALBU_BOVIN	69 294,2	1	3	3	4	0.000206	0.0643	KVPQVSTPTLVEVSR	R	S	0.997	3.79	0.39	1 639,9378
EC_212270_T33Vspike_9_B	Serum albumin OS=Bos taurus GN=ALB PE=1 SV=4	ALBU_BOVIN	69 294,2	1	3	3	4	0.000206	0.0643	RHPEYAVSVLLR	R	L	0.997	3.25	0.424	1 439,8117
EC_212270_T33Vspike_9_B	Serum albumin OS=Bos taurus GN=ALB PE=1 SV=4	ALBU_BOVIN	69 294,2	1	3	3	4	0.000206	0.0643	SLHTLFGDELCK	K	V	0.993	2.97	0.309	1 362,6724
EC_212270_T33Vspike_10_A	Serum albumin OS=Bos taurus GN=ALB PE=1 SV=4	ALBU_BOVIN	69 294,2	1	5	5	6	0.000325	0.112	ATEEQLKTVMENFVAFVDK	K	C	0.99	2.8	0.347	2 199,1003
EC_212270_T33Vspike_10_A	Serum albumin OS=Bos taurus GN=ALB PE=1 SV=4	ALBU_BOVIN	69 294,2	1	5	5	6	0.000325	0.112	KVPQVSTPTLVEVSR	R	S	0.997	3.18	0.319	1 639,9378
EC_212270_T33Vspike_10_A	Serum albumin OS=Bos taurus GN=ALB PE=1 SV=4	ALBU_BOVIN	69 294,2	1	5	5	6	0.000325	0.112	LVNELTEFAK	K	T	0.877	2.11	0.314	1 163,6307
EC_212270_T33Vspike_10_A	Serum albumin OS=Bos taurus GN=ALB PE=1 SV=4	ALBU_BOVIN	69 294,2	1	5	5	6	0.000325	0.112	RHPEYAVSVLLR	R	L	0.997	4.61	0.389	1 439,8117
EC_212270_T33Vspike_10_A	Serum albumin OS=Bos taurus GN=ALB PE=1 SV=4	ALBU_BOVIN	69 294,2	1	5	5	6	0.000325	0.112	SLHTLFGDELCK	K	V	0.942	2.62	0.385	1 362,6724
EC_212270_T33Vspike_10_B	Serum albumin OS=Bos taurus GN=ALB PE=1 SV=4	ALBU_BOVIN	69 294,2	1	5	5	6	0.000318	0.107	AEFVEVTKLVTDLTK	K	V	0.91	2.62	0.207	1 692,9420
EC_212270_T33Vspike_10_B	Serum albumin OS=Bos taurus GN=ALB PE=1 SV=4	ALBU_BOVIN	69 294,2	1	5	5	6	0.000318	0.107	DAFLGSFLYEYSR	K	R	0.997	3.23	0.362	1 567,7427
EC_212270_T33Vspike_10_B	Serum albumin OS=Bos taurus GN=ALB PE=1 SV=4	ALBU_BOVIN	69 294,2	1	5	5	6	0.000318	0.107	LGEYGFQNALIVR	K	Y	0.997	2.93	0.298	1 479,7955
EC_212270_T33Vspike_10_B	Serum albumin OS=Bos taurus GN=ALB PE=1 SV=4	ALBU_BOVIN	69 294,2	1	5	5	6	0.000318	0.107	RHPEYAVSVLLR	R	L	0.997	4.91	0.419	1 439,8117
EC_212270_T33Vspike_10_B	Serum albumin OS=Bos taurus GN=ALB PE=1 SV=4	ALBU_BOVIN	69 294,2	1	5	5	6	0.000318	0.107	SLHTLFGDELCK	K	V	0.995	2.82	0.288	1 362,6724
EC_212270_T33Vspike_11_B	Serum albumin OS=Bos taurus GN=ALB PE=1 SV=4	ALBU_BOVIN	69 294,2	1	2	2	3	0.00014	0.0395	RHPEYAVSVLLR	R	L	0.997	4.62	0.409	1 439,8117
EC_212270_T33Vspike_11_B	Serum albumin OS=Bos taurus GN=ALB PE=1 SV=4	ALBU_BOVIN	69 294,2	1	2	2	3	0.00014	0.0395	SLHTLFGDELCK	K	V	0.997	4.95	0.227	1 419,6939
EC_212270_T33Vspike_12_A	Serum albumin OS=Bos taurus GN=ALB PE=1 SV=4	ALBU_BOVIN	69 294,2	1	5	5	7	0.00035	0.122	ATEEQLKTVMENFVAFVDK	K	C	0.337	2.3	0.324	2 199,1003
EC_212270_T33Vspike_12_A	Serum albumin OS=Bos taurus GN=ALB PE=1 SV=4	ALBU_BOVIN	69 294,2	1	5	5	7	0.00035	0.122	KVPQVSTPTLVEVSR	R	S	0.628	3.12	0.202	1 639,9378
EC_212270_T33Vspike_12_A	Serum albumin OS=Bos taurus GN=ALB PE=1 SV=4	ALBU_BOVIN	69 294,2	1	5	5	7	0.00035	0.122	LCVLHEKTPVSEKVTK	R	C	0.58	1.61	0	1 811,0097
EC_212270_T33Vspike_12_A	Serum albumin OS=Bos taurus GN=ALB PE=1 SV=4	ALBU_BOVIN	69 294,2	1	5	5	7	0.00035	0.122	RHPEYAVSVLLR	R	L	0.997	4.52	0.44	1 439,8117
EC_212270_T33Vspike_12_A	Serum albumin OS=Bos taurus GN=ALB PE=1 SV=4	ALBU_BOVIN	69 294,2	1	5	5	7	0.00035	0.122	SLHTLFGDELCK	K	V	0.856	2.11	0	1 362,6724
EC_212270_T33Vspike_12_B	Serum albumin OS=Bos taurus GN=ALB PE=1 SV=4	ALBU_BOVIN	69 294,2	1	5	6	9	0.000481	0.105	KVPQVSTPTLVEVSR	R	S	0.822	2.53	0.162	1 639,9378
EC_212270_T33Vspike_12_B	Serum albumin OS=Bos taurus GN=ALB PE=1 SV=4	ALBU_BOVIN	69 294,2	1	5	6	9	0.000481	0.105	LCVLHEKTPVSEKVTK	R	C	0.276	1.68	-0.0434	1 811,0097
EC_212270_T33Vspike_12_B	Serum albumin OS=Bos taurus GN=ALB PE=1 SV=4	ALBU_BOVIN	69 294,2	1	5	6	9	0.000481	0.105	QTALVELLK	K	H	0.313	1.47	0.0395	1 014,6195
EC_212270_T33Vspike_12_B	Serum albumin OS=Bos taurus GN=ALB PE=1 SV=4	ALBU_BOVIN	69 294,2	1	5	6	9	0.000481	0.105	RHPEYAVSVLLR	R	L	0.997	4.34	0.387	1 439,8117
EC_212270_T33Vspike_12_B	Serum albumin OS=Bos taurus GN=ALB PE=1 SV=4	ALBU_BOVIN	69 294,2	1	5	6	9	0.000481	0.105	SLHTLFGDELCK	K	V	0.732	2.08	0.204	1 362,6724
EC_212270_T33Vspike_1_A	Fructose-bisphosphate aldolase A OS=Homo sapiens GN=ALDOA PE=1 SV=2	ALDOA_HUMAN,ALDOA_PANTR	39 420,6	1	4	4	6	0.000258	0.201	ALANSLACQGKYTPSGQAGAAASESLFVSNHAY	R	-	0.987	3.5	0.396	3 341,5855
EC_212270_T33Vspike_1_A	Fructose-bisphosphate aldolase A OS=Homo sapiens GN=ALDOA PE=1 SV=2	ALDOA_HUMAN,ALDOA_PANTR	39 420,6	1	4	4	6	0.000258	0.201	IGEHTPSALAIMENANVLAR	K	Y	0.995	3.27	0.329	2 107,0965
EC_212270_T33Vspike_1_A	Fructose-bisphosphate aldolase A OS=Homo sapiens GN=ALDOA PE=1 SV=2	ALDOA_HUMAN,ALDOA_PANTR	39 420,6	1	4	4	6	0.000258	0.201	IVAPGKGILAADESTGSIAK	R	R	0.981	2.65	0.356	1 898,0596
EC_212270_T33Vspike_1_A	Fructose-bisphosphate aldolase A OS=Homo sapiens GN=ALDOA PE=1 SV=2	ALDOA_HUMAN,ALDOA_PANTR	39 420,6	1	4	4	6	0.000258	0.201	YTPSGQAGAAASESLFVSNHAY	K	-	0.997	4.12	0.525	2 228,0253
EC_212270_T33Vspike_1_B	Fructose-bisphosphate aldolase A OS=Homo sapiens GN=ALDOA PE=1 SV=2	ALDOA_HUMAN,ALDOA_PANTR	39 420,6	1	5	5	6	0.000273	0.19	ALANSLACQGK	R	Y	0.878	2.43	0.323	1 132,5780
EC_212270_T33Vspike_1_B	Fructose-bisphosphate aldolase A OS=Homo sapiens GN=ALDOA PE=1 SV=2	ALDOA_HUMAN,ALDOA_PANTR	39 420,6	1	5	5	6	0.000273	0.19	ALANSLACQGKYTPSGQAGAAASESLFVSNHAY	R	-	0.952	2.98	0.171	3 341,5855
EC_212270_T33Vspike_1_B	Fructose-bisphosphate aldolase A OS=Homo sapiens GN=ALDOA PE=1 SV=2	ALDOA_HUMAN,ALDOA_PANTR	39 420,6	1	5	5	6	0.000273	0.19	FSHEEIAMATVTALRR	K	T	0.941	2.55	0.027	1 831,9483
EC_212270_T33Vspike_1_B	Fructose-bisphosphate aldolase A OS=Homo sapiens GN=ALDOA PE=1 SV=2	ALDOA_HUMAN,ALDOA_PANTR	39 420,6	1	5	5	6	0.000273	0.19	IVAPGKGILAADESTGSIAK	R	R	0.975	2.56	0.381	1 898,0596
EC_212270_T33Vspike_1_B	Fructose-bisphosphate aldolase A OS=Homo sapiens GN=ALDOA PE=1 SV=2	ALDOA_HUMAN,ALDOA_PANTR	39 420,6	1	5	5	6	0.000273	0.19	YTPSGQAGAAASESLFVSNHAY	K	-	0.997	4.26	0.552	2 228,0253
EC_212270_T33Vspike_4_A	Fructose-bisphosphate aldolase A OS=Homo sapiens GN=ALDOA PE=1 SV=2	ALDOA_HUMAN,ALDOA_PANTR	39 420,6	1	3	3	4	0.000161	0.118	GILAADESTGSIAKR	K	L	0.894	2.93	0.175	1 488,8018
EC_212270_T33Vspike_4_A	Fructose-bisphosphate aldolase A OS=Homo sapiens GN=ALDOA PE=1 SV=2	ALDOA_HUMAN,ALDOA_PANTR	39 420,6	1	3	3	4	0.000161	0.118	IVAPGKGILAADESTGSIAK	R	R	0.937	2.08	0.535	1 898,0596
EC_212270_T33Vspike_4_A	Fructose-bisphosphate aldolase A OS=Homo sapiens GN=ALDOA PE=1 SV=2	ALDOA_HUMAN,ALDOA_PANTR	39 420,6	1	3	3	4	0.000161	0.118	YTPSGQAGAAASESLFVSNHAY	K	-	0.997	3.9	0.504	2 228,0253
EC_212270_T33Vspike_4_B	Fructose-bisphosphate aldolase A OS=Homo sapiens GN=ALDOA PE=1 SV=2	ALDOA_HUMAN,ALDOA_PANTR	39 420,6	1	2	2	2	7.93e-05	0.115	IVAPGKGILAADESTGSIAK	R	R	0.977	2.39	0.376	1 898,0596
EC_212270_T33Vspike_4_B	Fructose-bisphosphate aldolase A OS=Homo sapiens GN=ALDOA PE=1 SV=2	ALDOA_HUMAN,ALDOA_PANTR	39 420,6	1	2	2	2	7.93e-05	0.115	YTPSGQAGAAASESLFVSNHAY	K	-	0.992	3.22	0.481	2 228,0253
EC_212270_T33Vspike_5_A	Fructose-bisphosphate aldolase A OS=Homo sapiens GN=ALDOA PE=1 SV=2	ALDOA_HUMAN,ALDOA_PANTR	39 420,6	1	3	4	5	0.000211	0.0907	ALANSLACQGK	R	Y	0.894	1.86	0.357	1 132,5780
EC_212270_T33Vspike_5_A	Fructose-bisphosphate aldolase A OS=Homo sapiens GN=ALDOA PE=1 SV=2	ALDOA_HUMAN,ALDOA_PANTR	39 420,6	1	3	4	5	0.000211	0.0907	ALANSLACQGKYTPSGQAGAAASESLFVSNHAY	R	-	0.97	2.9	0.392	3 284,5640
EC_212270_T33Vspike_5_A	Fructose-bisphosphate aldolase A OS=Homo sapiens GN=ALDOA PE=1 SV=2	ALDOA_HUMAN,ALDOA_PANTR	39 420,6	1	3	4	5	0.000211	0.0907	YTPSGQAGAAASESLFVSNHAY	K	-	0.997	3.5	0.49	2 228,0253
EC_212270_T33Vspike_5_B	Fructose-bisphosphate aldolase A OS=Homo sapiens GN=ALDOA PE=1 SV=2	ALDOA_HUMAN,ALDOA_PANTR	39 420,6	1	3	3	5	0.000255	0.157	ALANSLACQGKYTPSGQAGAAASESLFVSNHAY	R	-	0.997	4.78	0.492	3 341,5855
EC_212270_T33Vspike_5_B	Fructose-bisphosphate aldolase A OS=Homo sapiens GN=ALDOA PE=1 SV=2	ALDOA_HUMAN,ALDOA_PANTR	39 420,6	1	3	3	5	0.000255	0.157	CVLKIGEHTPSALAIMENANVLAR	R	Y	0.98	3.33	0.302	2 607,3747
EC_212270_T33Vspike_5_B	Fructose-bisphosphate aldolase A OS=Homo sapiens GN=ALDOA PE=1 SV=2	ALDOA_HUMAN,ALDOA_PANTR	39 420,6	1	3	3	5	0.000255	0.157	YTPSGQAGAAASESLFVSNHAY	K	-	0.997	3.56	0.445	2 228,0253
EC_212270_T33Vspike_2_A	Fructose-bisphosphate aldolase A OS=Homo sapiens GN=ALDOA PE=1 SV=2	ALDOA_HUMAN,ALDOA_PANTR,ALDOA_PONAB	39 420,6	1	8	9	10	0.000417	0.277	AAQEEYVKR	K	A	0.828	2.09	0.345	1 093,5636
EC_212270_T33Vspike_2_A	Fructose-bisphosphate aldolase A OS=Homo sapiens GN=ALDOA PE=1 SV=2	ALDOA_HUMAN,ALDOA_PANTR,ALDOA_PONAB	39 420,6	1	8	9	10	0.000417	0.277	ALANSLACQGK	R	Y	0.967	2.68	0.445	1 132,5780
EC_212270_T33Vspike_2_A	Fructose-bisphosphate aldolase A OS=Homo sapiens GN=ALDOA PE=1 SV=2	ALDOA_HUMAN,ALDOA_PANTR,ALDOA_PONAB	39 420,6	1	8	9	10	0.000417	0.277	CVLKIGEHTPSALAIMENANVLAR	R	Y	0.995	3.66	0.229	2 607,3747
EC_212270_T33Vspike_2_A	Fructose-bisphosphate aldolase A OS=Homo sapiens GN=ALDOA PE=1 SV=2	ALDOA_HUMAN,ALDOA_PANTR,ALDOA_PONAB	39 420,6	1	8	9	10	0.000417	0.277	GILAADESTGSIAKR	K	L	0.982	2.79	0.138	1 488,8018
EC_212270_T33Vspike_2_A	Fructose-bisphosphate aldolase A OS=Homo sapiens GN=ALDOA PE=1 SV=2	ALDOA_HUMAN,ALDOA_PANTR,ALDOA_PONAB	39 420,6	1	8	9	10	0.000417	0.277	IVAPGKGILAADESTGSIAK	R	R	0.988	2.65	0.332	1 898,0596
EC_212270_T33Vspike_2_A	Fructose-bisphosphate aldolase A OS=Homo sapiens GN=ALDOA PE=1 SV=2	ALDOA_HUMAN,ALDOA_PANTR,ALDOA_PONAB	39 420,6	1	8	9	10	0.000417	0.277	IVAPGKGILAADESTGSIAKR	R	L	0.985	2.73	0.534	2 054,1607
EC_212270_T33Vspike_2_A	Fructose-bisphosphate aldolase A OS=Homo sapiens GN=ALDOA PE=1 SV=2	ALDOA_HUMAN,ALDOA_PANTR,ALDOA_PONAB	39 420,6	1	8	9	10	0.000417	0.277	RLQSIGTENTEENRR	K	F	0.904	2.89	0.209	1 802,9104
EC_212270_T33Vspike_2_A	Fructose-bisphosphate aldolase A OS=Homo sapiens GN=ALDOA PE=1 SV=2	ALDOA_HUMAN,ALDOA_PANTR,ALDOA_PONAB	39 420,6	1	8	9	10	0.000417	0.277	YTPSGQAGAAASESLFVSNHAY	K	-	0.986	3.26	0.316	2 228,0253
EC_212270_T33Vspike_2_B	Fructose-bisphosphate aldolase A OS=Homo sapiens GN=ALDOA PE=1 SV=2	ALDOA_HUMAN,ALDOA_PANTR,ALDOA_PONAB	39 420,6	1	5	7	7	0.000305	0.148	ALANSLACQGK	R	Y	0.925	2.6	0.354	1 132,5780
EC_212270_T33Vspike_2_B	Fructose-bisphosphate aldolase A OS=Homo sapiens GN=ALDOA PE=1 SV=2	ALDOA_HUMAN,ALDOA_PANTR,ALDOA_PONAB	39 420,6	1	5	7	7	0.000305	0.148	ALANSLACQGKYTPSGQAGAAASESLFVSNHAY	R	-	0.898	2.42	0.285	3 341,5855
EC_212270_T33Vspike_2_B	Fructose-bisphosphate aldolase A OS=Homo sapiens GN=ALDOA PE=1 SV=2	ALDOA_HUMAN,ALDOA_PANTR,ALDOA_PONAB	39 420,6	1	5	7	7	0.000305	0.148	IVAPGKGILAADESTGSIAK	R	R	0.971	2.41	0.429	1 898,0596
EC_212270_T33Vspike_2_B	Fructose-bisphosphate aldolase A OS=Homo sapiens GN=ALDOA PE=1 SV=2	ALDOA_HUMAN,ALDOA_PANTR,ALDOA_PONAB	39 420,6	1	5	7	7	0.000305	0.148	IVAPGKGILAADESTGSIAKR	R	L	0.987	3.18	0.53	2 054,1607
EC_212270_T33Vspike_2_B	Fructose-bisphosphate aldolase A OS=Homo sapiens GN=ALDOA PE=1 SV=2	ALDOA_HUMAN,ALDOA_PANTR,ALDOA_PONAB	39 420,6	1	5	7	7	0.000305	0.148	YTPSGQAGAAASESLFVSNHAY	K	-	0.997	4.05	0.518	2 228,0253
EC_212270_T33Vspike_3_A	Fructose-bisphosphate aldolase A OS=Homo sapiens GN=ALDOA PE=1 SV=2	ALDOA_HUMAN,ALDOA_PANTR,ALDOA_PONAB	39 420,6	1	4	4	6	0.000302	0.203	ALANSLACQGKYTPSGQAGAAASESLFVSNHAY	R	-	0.718	2.42	0.238	3 341,5855
EC_212270_T33Vspike_3_A	Fructose-bisphosphate aldolase A OS=Homo sapiens GN=ALDOA PE=1 SV=2	ALDOA_HUMAN,ALDOA_PANTR,ALDOA_PONAB	39 420,6	1	4	4	6	0.000302	0.203	IGEHTPSALAIMENANVLAR	K	Y	0.825	2.61	0.154	2 107,0965
EC_212270_T33Vspike_3_A	Fructose-bisphosphate aldolase A OS=Homo sapiens GN=ALDOA PE=1 SV=2	ALDOA_HUMAN,ALDOA_PANTR,ALDOA_PONAB	39 420,6	1	4	4	6	0.000302	0.203	IVAPGKGILAADESTGSIAKR	R	L	0.864	2.29	0.437	2 054,1607
EC_212270_T33Vspike_3_A	Fructose-bisphosphate aldolase A OS=Homo sapiens GN=ALDOA PE=1 SV=2	ALDOA_HUMAN,ALDOA_PANTR,ALDOA_PONAB	39 420,6	1	4	4	6	0.000302	0.203	YTPSGQAGAAASESLFVSNHAY	K	-	0.997	4.2	0.571	2 228,0253
EC_212270_T33Vspike_3_B	Fructose-bisphosphate aldolase A OS=Homo sapiens GN=ALDOA PE=1 SV=2	ALDOA_HUMAN,ALDOA_PANTR,ALDOA_PONAB	39 420,6	1	6	6	8	0.00042	0.214	ALANSLACQGK	R	Y	0.225	1.68	0.271	1 132,5780
EC_212270_T33Vspike_3_B	Fructose-bisphosphate aldolase A OS=Homo sapiens GN=ALDOA PE=1 SV=2	ALDOA_HUMAN,ALDOA_PANTR,ALDOA_PONAB	39 420,6	1	6	6	8	0.00042	0.214	ALANSLACQGKYTPSGQAGAAASESLFVSNHAY	R	-	0.32	2.23	0.111	3 341,5855
EC_212270_T33Vspike_3_B	Fructose-bisphosphate aldolase A OS=Homo sapiens GN=ALDOA PE=1 SV=2	ALDOA_HUMAN,ALDOA_PANTR,ALDOA_PONAB	39 420,6	1	6	6	8	0.00042	0.214	CVLKIGEHTPSALAIMENANVLAR	R	Y	0.066	1.92	-0.0456	2 607,3747
EC_212270_T33Vspike_3_B	Fructose-bisphosphate aldolase A OS=Homo sapiens GN=ALDOA PE=1 SV=2	ALDOA_HUMAN,ALDOA_PANTR,ALDOA_PONAB	39 420,6	1	6	6	8	0.00042	0.214	IGEHTPSALAIMENANVLAR	K	Y	0.965	3.03	0.287	2 107,0965
EC_212270_T33Vspike_3_B	Fructose-bisphosphate aldolase A OS=Homo sapiens GN=ALDOA PE=1 SV=2	ALDOA_HUMAN,ALDOA_PANTR,ALDOA_PONAB	39 420,6	1	6	6	8	0.00042	0.214	IVAPGKGILAADESTGSIAKR	R	L	0.753	2.56	0.216	2 054,1607
EC_212270_T33Vspike_3_B	Fructose-bisphosphate aldolase A OS=Homo sapiens GN=ALDOA PE=1 SV=2	ALDOA_HUMAN,ALDOA_PANTR,ALDOA_PONAB	39 420,6	1	6	6	8	0.00042	0.214	YTPSGQAGAAASESLFVSNHAY	K	-	0.997	3.75	0.558	2 228,0253
EC_212270_T33Vspike_6_A	Fructose-bisphosphate aldolase A OS=Homo sapiens GN=ALDOA PE=1 SV=2	ALDOA_HUMAN,ALDOA_PANTR,ALDOA_PONAB	39 420,6	1	3	3	3	0.000166	0.157	ALANSLACQGKYTPSGQAGAAASESLFVSNHAY	R	-	0.984	3.06	0.345	3 341,5855
EC_212270_T33Vspike_6_A	Fructose-bisphosphate aldolase A OS=Homo sapiens GN=ALDOA PE=1 SV=2	ALDOA_HUMAN,ALDOA_PANTR,ALDOA_PONAB	39 420,6	1	3	3	3	0.000166	0.157	CVLKIGEHTPSALAIMENANVLAR	R	Y	0.948	3.06	0.251	2 607,3747
EC_212270_T33Vspike_6_A	Fructose-bisphosphate aldolase A OS=Homo sapiens GN=ALDOA PE=1 SV=2	ALDOA_HUMAN,ALDOA_PANTR,ALDOA_PONAB	39 420,6	1	3	3	3	0.000166	0.157	YTPSGQAGAAASESLFVSNHAY	K	-	0.917	2.53	0.443	2 228,0253
EC_212270_T33Vspike_7_A	Fructose-bisphosphate aldolase A OS=Homo sapiens GN=ALDOA PE=1 SV=2	ALDOA_HUMAN,ALDOA_PANTR,ALDOA_PONAB	39 420,6	1	3	4	5	0.000226	0.146	ALANSLACQGKYTPSGQAGAAASESLFVSNHAY	R	-	0.997	3.82	0.495	3 341,5855
EC_212270_T33Vspike_7_A	Fructose-bisphosphate aldolase A OS=Homo sapiens GN=ALDOA PE=1 SV=2	ALDOA_HUMAN,ALDOA_PANTR,ALDOA_PONAB	39 420,6	1	3	4	5	0.000226	0.146	IGEHTPSALAIMENANVLAR	K	Y	0.995	3.42	0.183	2 107,0965
EC_212270_T33Vspike_7_A	Fructose-bisphosphate aldolase A OS=Homo sapiens GN=ALDOA PE=1 SV=2	ALDOA_HUMAN,ALDOA_PANTR,ALDOA_PONAB	39 420,6	1	3	4	5	0.000226	0.146	YTPSGQAGAAASESLFVSNHAY	K	-	0.98	3.26	0.455	2 228,0253
EC_212270_T33Vspike_7_B	Fructose-bisphosphate aldolase A OS=Homo sapiens GN=ALDOA PE=1 SV=2	ALDOA_HUMAN,ALDOA_PANTR,ALDOA_PONAB	39 420,6	1	3	4	5	0.000227	0.148	ALANSLACQGKYTPSGQAGAAASESLFVSNHAY	R	-	0.943	3.3	0.269	3 341,5855
EC_212270_T33Vspike_7_B	Fructose-bisphosphate aldolase A OS=Homo sapiens GN=ALDOA PE=1 SV=2	ALDOA_HUMAN,ALDOA_PANTR,ALDOA_PONAB	39 420,6	1	3	4	5	0.000227	0.148	IVAPGKGILAADESTGSIAKR	R	L	0.701	1.89	0.222	2 054,1607
EC_212270_T33Vspike_7_B	Fructose-bisphosphate aldolase A OS=Homo sapiens GN=ALDOA PE=1 SV=2	ALDOA_HUMAN,ALDOA_PANTR,ALDOA_PONAB	39 420,6	1	3	4	5	0.000227	0.148	YTPSGQAGAAASESLFVSNHAY	K	-	0.982	3.07	0.454	2 228,0253
EC_212270_T33Vspike_8_A	Fructose-bisphosphate aldolase A OS=Homo sapiens GN=ALDOA PE=1 SV=2	ALDOA_HUMAN,ALDOA_PANTR,ALDOA_PONAB	39 420,6	1	5	5	6	0.000282	0.203	ALANSLACQGK	R	Y	0.917	2.7	0.25	1 132,5780
EC_212270_T33Vspike_8_A	Fructose-bisphosphate aldolase A OS=Homo sapiens GN=ALDOA PE=1 SV=2	ALDOA_HUMAN,ALDOA_PANTR,ALDOA_PONAB	39 420,6	1	5	5	6	0.000282	0.203	ALANSLACQGKYTPSGQAGAAASESLFVSNHAY	R	-	0.997	3.59	0.347	3 341,5855
EC_212270_T33Vspike_8_A	Fructose-bisphosphate aldolase A OS=Homo sapiens GN=ALDOA PE=1 SV=2	ALDOA_HUMAN,ALDOA_PANTR,ALDOA_PONAB	39 420,6	1	5	5	6	0.000282	0.203	IGEHTPSALAIMENANVLAR	K	Y	0.997	3.23	0.303	2 107,0965
EC_212270_T33Vspike_8_A	Fructose-bisphosphate aldolase A OS=Homo sapiens GN=ALDOA PE=1 SV=2	ALDOA_HUMAN,ALDOA_PANTR,ALDOA_PONAB	39 420,6	1	5	5	6	0.000282	0.203	IVAPGKGILAADESTGSIAKR	R	L	0.985	3.29	0.422	2 054,1607
EC_212270_T33Vspike_8_A	Fructose-bisphosphate aldolase A OS=Homo sapiens GN=ALDOA PE=1 SV=2	ALDOA_HUMAN,ALDOA_PANTR,ALDOA_PONAB	39 420,6	1	5	5	6	0.000282	0.203	YTPSGQAGAAASESLFVSNHAY	K	-	0.997	3.93	0.553	2 228,0253
EC_212270_T33Vspike_9_B	Fructose-bisphosphate aldolase A OS=Homo sapiens GN=ALDOA PE=1 SV=2	ALDOA_HUMAN,ALDOA_PANTR,ALDOA_PONAB	39 420,6	1	3	3	3	0.000155	0.146	ALANSLACQGKYTPSGQAGAAASESLFVSNHAY	R	-	0.974	2.84	0.31	3 341,5855
EC_212270_T33Vspike_9_B	Fructose-bisphosphate aldolase A OS=Homo sapiens GN=ALDOA PE=1 SV=2	ALDOA_HUMAN,ALDOA_PANTR,ALDOA_PONAB	39 420,6	1	3	3	3	0.000155	0.146	IVAPGKGILAADESTGSIAK	R	R	0.997	3.12	0.469	1 898,0596
EC_212270_T33Vspike_9_B	Fructose-bisphosphate aldolase A OS=Homo sapiens GN=ALDOA PE=1 SV=2	ALDOA_HUMAN,ALDOA_PANTR,ALDOA_PONAB	39 420,6	1	3	3	3	0.000155	0.146	YTPSGQAGAAASESLFVSNHAY	K	-	0.997	3	0.537	2 228,0253
EC_212270_T33Vspike_10_A	Fructose-bisphosphate aldolase A OS=Homo sapiens GN=ALDOA PE=1 SV=2	ALDOA_HUMAN,ALDOA_PANTR,ALDOA_PONAB	39 420,6	1	3	3	4	0.000217	0.0907	ALANSLACQGK	R	Y	0.832	2.42	0.274	1 132,5780
EC_212270_T33Vspike_10_A	Fructose-bisphosphate aldolase A OS=Homo sapiens GN=ALDOA PE=1 SV=2	ALDOA_HUMAN,ALDOA_PANTR,ALDOA_PONAB	39 420,6	1	3	3	4	0.000217	0.0907	ALANSLACQGKYTPSGQAGAAASESLFVSNHAY	R	-	0.984	3.16	0.19	3 341,5855
EC_212270_T33Vspike_10_A	Fructose-bisphosphate aldolase A OS=Homo sapiens GN=ALDOA PE=1 SV=2	ALDOA_HUMAN,ALDOA_PANTR,ALDOA_PONAB	39 420,6	1	3	3	4	0.000217	0.0907	YTPSGQAGAAASESLFVSNHAY	K	-	0.989	3.1	0.427	2 228,0253
EC_212270_T33Vspike_12_B	Fructose-bisphosphate aldolase A OS=Homo sapiens GN=ALDOA PE=1 SV=2	ALDOA_HUMAN,ALDOA_PANTR,ALDOA_PONAB	39 420,6	0.994	3	3	3	0.00016	0.173	IGEHTPSALAIMENANVLAR	K	Y	0.694	2.43	0.0715	2 107,0965
EC_212270_T33Vspike_12_B	Fructose-bisphosphate aldolase A OS=Homo sapiens GN=ALDOA PE=1 SV=2	ALDOA_HUMAN,ALDOA_PANTR,ALDOA_PONAB	39 420,6	0.994	3	3	3	0.00016	0.173	IVAPGKGILAADESTGSIAKR	R	L	0.874	2.78	0.134	2 054,1607
EC_212270_T33Vspike_12_B	Fructose-bisphosphate aldolase A OS=Homo sapiens GN=ALDOA PE=1 SV=2	ALDOA_HUMAN,ALDOA_PANTR,ALDOA_PONAB	39 420,6	0.994	3	3	3	0.00016	0.173	YTPSGQAGAAASESLFVSNHAY	K	-	0.833	2.52	0.278	2 228,0253
EC_212270_T33Vspike_2_A	Cytosol aminopeptidase OS=Homo sapiens GN=LAP3 PE=1 SV=3	AMPL_HUMAN	56 167,8	1	3	3	3	0.000125	0.0655	GVLFASGQNLAR	K	Q	0.981	2.66	0.347	1 232,6746
EC_212270_T33Vspike_2_A	Cytosol aminopeptidase OS=Homo sapiens GN=LAP3 PE=1 SV=3	AMPL_HUMAN	56 167,8	1	3	3	3	0.000125	0.0655	TFYGLHQDFPSVVLVGLGKK	R	A	0.997	3.62	0.443	2 205,2069
EC_212270_T33Vspike_2_A	Cytosol aminopeptidase OS=Homo sapiens GN=LAP3 PE=1 SV=3	AMPL_HUMAN	56 167,8	1	3	3	3	0.000125	0.0655	TRTFYGLHQDFPSVVLVGLGKK	K	A	0.902	2.89	0.229	2 462,3557
EC_212270_T33Vspike_1_B	DNA-(apurinic or apyrimidinic site) lyase OS=Homo sapiens GN=APEX1 PE=1 SV=2	APEX1_HUMAN,APEX1_PANPA	35 555,7	0.999	2	2	2	9.09e-05	0.176	CSENKLPAELQELPGLSHQYWSAPSDKEGYSGVGLLSR	K	Q	0.989	4.11	0.341	4 203,0455
EC_212270_T33Vspike_1_B	DNA-(apurinic or apyrimidinic site) lyase OS=Homo sapiens GN=APEX1 PE=1 SV=2	APEX1_HUMAN,APEX1_PANPA	35 555,7	0.999	2	2	2	9.09e-05	0.176	KGAVAEDGDELRTEPEAK	K	K	0.801	2.14	0.312	1 914,9406
EC_212270_T33Vspike_2_A	DNA-(apurinic or apyrimidinic site) lyase OS=Homo sapiens GN=APEX1 PE=1 SV=2	APEX1_HUMAN,APEX1_PANPA	35 555,7	1	2	2	2	8.35e-05	0.0566	GAVAEDGDELRTEPEAK	K	K	0.991	3.22	0.382	1 786,8456
EC_212270_T33Vspike_2_A	DNA-(apurinic or apyrimidinic site) lyase OS=Homo sapiens GN=APEX1 PE=1 SV=2	APEX1_HUMAN,APEX1_PANPA	35 555,7	1	2	2	2	8.35e-05	0.0566	KGAVAEDGDELRTEPEAK	K	K	0.997	3.43	0.445	1 914,9406
EC_212270_T33Vspike_2_B	DNA-(apurinic or apyrimidinic site) lyase OS=Homo sapiens GN=APEX1 PE=1 SV=2	APEX1_HUMAN,APEX1_PANPA	35 555,7	1	3	3	3	0.000131	0.116	GAVAEDGDELRTEPEAK	K	K	0.937	2.67	0.374	1 786,8456
EC_212270_T33Vspike_2_B	DNA-(apurinic or apyrimidinic site) lyase OS=Homo sapiens GN=APEX1 PE=1 SV=2	APEX1_HUMAN,APEX1_PANPA	35 555,7	1	3	3	3	0.000131	0.116	GLDWVKEEAPDILCLQETK	K	C	0.961	3.09	0.203	2 244,1221
EC_212270_T33Vspike_2_B	DNA-(apurinic or apyrimidinic site) lyase OS=Homo sapiens GN=APEX1 PE=1 SV=2	APEX1_HUMAN,APEX1_PANPA	35 555,7	1	3	3	3	0.000131	0.116	KGAVAEDGDELRTEPEAK	K	K	0.88	2.78	0.324	1 914,9406
EC_212270_T33Vspike_1_A	Apolipoprotein A-II OS=Bos taurus GN=APOA2 PE=1 SV=2	APOA2_BOVIN	11 202,5	1	3	3	6	0.000258	0.32	AGTDLLNFLSSFIDPK	K	K	0.997	4.11	0.309	1 737,9060
EC_212270_T33Vspike_1_A	Apolipoprotein A-II OS=Bos taurus GN=APOA2 PE=1 SV=2	APOA2_BOVIN	11 202,5	1	3	3	6	0.000258	0.32	AYFEKTQEELTPFFK	K	K	0.977	3.12	0.442	1 877,9321
EC_212270_T33Vspike_1_A	Apolipoprotein A-II OS=Bos taurus GN=APOA2 PE=1 SV=2	APOA2_BOVIN	11 202,5	1	3	3	6	0.000258	0.32	KAGTDLLNFLSSFIDPK	K	K	0.909	2.68	0.159	1 866,0010
EC_212270_T33Vspike_1_B	Apolipoprotein A-II OS=Bos taurus GN=APOA2 PE=1 SV=2	APOA2_BOVIN	11 202,5	1	2	2	5	0.000227	0.17	AGTDLLNFLSSFIDPK	K	K	0.997	4.67	0.475	1 737,9060
EC_212270_T33Vspike_1_B	Apolipoprotein A-II OS=Bos taurus GN=APOA2 PE=1 SV=2	APOA2_BOVIN	11 202,5	1	2	2	5	0.000227	0.17	KAGTDLLNFLSSFIDPK	K	K	0.995	3.06	0.379	1 866,0010
EC_212270_T33Vspike_3_A	Apolipoprotein A-II OS=Bos taurus GN=APOA2 PE=1 SV=2	APOA2_BOVIN	11 202,5	0.999	2	2	3	0.000151	0.32	AGTDLLNFLSSFIDPK	K	K	0.997	4.27	0.433	1 737,9060
EC_212270_T33Vspike_3_A	Apolipoprotein A-II OS=Bos taurus GN=APOA2 PE=1 SV=2	APOA2_BOVIN	11 202,5	0.999	2	2	3	0.000151	0.32	AYFEKTQEELTPFFKK	K	A	0.527	2.38	0.163	2 006,0271
EC_212270_T33Vspike_7_A	Adenine phosphoribosyltransferase OS=Homo sapiens GN=APRT PE=1 SV=2	APT_HUMAN	19 608,5	0.992	2	2	3	0.000136	0.0833	EKLAPVPFFSLLQYE	R	-	0.964	3.18	0.392	1 780,9521
EC_212270_T33Vspike_7_A	Adenine phosphoribosyltransferase OS=Homo sapiens GN=APRT PE=1 SV=2	APT_HUMAN	19 608,5	0.992	2	2	3	0.000136	0.0833	LAPVPFFSLLQYE	K	-	0.791	2.76	0.289	1 523,8145
EC_212270_T33Vspike_8_A	ADP-ribosylation factor-like protein 3 OS=Bos taurus GN=ARL3 PE=2 SV=1	ARL3_BOVIN,ARL3_HUMAN,ARL3_MOUSE,ARL3_PIG,ARL3_PONAB,ARL3_RAT,ARL3_TAEGU,ARL3_XENLA	20 505,4	0.999	2	2	2	9.39e-05	0.297	ILLLGLDNAGKTTLLKQLASEDISHITPTQGFNIK	R	S	0.989	3.37	0.459	3 763,1011
EC_212270_T33Vspike_8_A	ADP-ribosylation factor-like protein 3 OS=Bos taurus GN=ARL3 PE=2 SV=1	ARL3_BOVIN,ARL3_HUMAN,ARL3_MOUSE,ARL3_PIG,ARL3_PONAB,ARL3_RAT,ARL3_TAEGU,ARL3_XENLA	20 505,4	0.999	2	2	2	9.39e-05	0.297	SVQSQGFKLNVWDIGGQRK	K	I	0.918	2.49	0.276	2 147,1358
EC_212270_T33Vspike_8_B	ADP-ribosylation factor-like protein 3 OS=Bos taurus GN=ARL3 PE=2 SV=1	ARL3_BOVIN,ARL3_HUMAN,ARL3_MOUSE,ARL3_PIG,ARL3_PONAB,ARL3_RAT,ARL3_TAEGU,ARL3_XENLA	20 505,4	1	2	2	2	9.59e-05	0.297	ILLLGLDNAGKTTLLKQLASEDISHITPTQGFNIK	R	S	0.997	3.32	0.411	3 763,1011
EC_212270_T33Vspike_8_B	ADP-ribosylation factor-like protein 3 OS=Bos taurus GN=ARL3 PE=2 SV=1	ARL3_BOVIN,ARL3_HUMAN,ARL3_MOUSE,ARL3_PIG,ARL3_PONAB,ARL3_RAT,ARL3_TAEGU,ARL3_XENLA	20 505,4	1	2	2	2	9.59e-05	0.297	SVQSQGFKLNVWDIGGQRK	K	I	0.997	3.51	0.336	2 147,1358
EC_212270_T33Vspike_9_B	ADP-ribosylation factor-like protein 3 OS=Bos taurus GN=ARL3 PE=2 SV=1	ARL3_BOVIN,ARL3_HUMAN,ARL3_MOUSE,ARL3_PIG,ARL3_PONAB,ARL3_RAT,ARL3_TAEGU,ARL3_XENLA	20 505,4	0.998	2	2	2	0.000103	0.297	ILLLGLDNAGKTTLLKQLASEDISHITPTQGFNIK	R	S	0.954	2.83	0.343	3 763,1011
EC_212270_T33Vspike_9_B	ADP-ribosylation factor-like protein 3 OS=Bos taurus GN=ARL3 PE=2 SV=1	ARL3_BOVIN,ARL3_HUMAN,ARL3_MOUSE,ARL3_PIG,ARL3_PONAB,ARL3_RAT,ARL3_TAEGU,ARL3_XENLA	20 505,4	0.998	2	2	2	0.000103	0.297	SVQSQGFKLNVWDIGGQRK	K	I	0.961	2.73	0.337	2 147,1358
EC_212270_T33Vspike_2_A	cAMP-regulated phosphoprotein 19 OS=Bos taurus GN=ARPP19 PE=1 SV=2	ARP19_BOVIN,ARP19_CHICK,ARP19_HUMAN,ARP19_MOUSE,ARP19_TAEGU	12 353,4	0.991	1	1	3	0.000125	0.25	ARYPHLGQKPGGSDFLR	K	K	0.985	2.94	0.349	1 898,9986
EC_212270_T33Vspike_2_A	cAMP-regulated phosphoprotein 19 OS=Bos taurus GN=ARPP19 PE=1 SV=2	ARP19_BOVIN,ARP19_CHICK,ARP19_HUMAN,ARP19_MOUSE,ARP19_TAEGU	12 353,4	0.991	1	1	3	0.000125	0.25	YFDSGDYNMAK	K	A	0.997	3.64	0.682	1 310,5358
EC_212270_T33Vspike_4_A	cAMP-regulated phosphoprotein 19 OS=Bos taurus GN=ARPP19 PE=1 SV=2	ARP19_BOVIN,ARP19_CHICK,ARP19_HUMAN,ARP19_MOUSE,ARP19_TAEGU	12 353,4	0.996	1	1	4	0.000161	0.25	ARYPHLGQKPGGSDFLR	K	K	0.962	2.98	0.361	1 898,9986
EC_212270_T33Vspike_4_A	cAMP-regulated phosphoprotein 19 OS=Bos taurus GN=ARPP19 PE=1 SV=2	ARP19_BOVIN,ARP19_CHICK,ARP19_HUMAN,ARP19_MOUSE,ARP19_TAEGU	12 353,4	0.996	1	1	4	0.000161	0.25	YFDSGDYNMAK	K	A	0.997	3.64	0.401	1 310,5358
EC_212270_T33Vspike_7_A	cAMP-regulated phosphoprotein 19 OS=Bos taurus GN=ARPP19 PE=1 SV=2	ARP19_BOVIN,ARP19_CHICK,ARP19_HUMAN,ARP19_MOUSE,ARP19_TAEGU	12 353,4	0.998	1	1	2	9.04e-05	0.25	ARYPHLGQKPGGSDFLR	K	K	0.997	2.97	0.317	1 898,9986
EC_212270_T33Vspike_7_A	cAMP-regulated phosphoprotein 19 OS=Bos taurus GN=ARPP19 PE=1 SV=2	ARP19_BOVIN,ARP19_CHICK,ARP19_HUMAN,ARP19_MOUSE,ARP19_TAEGU	12 353,4	0.998	1	1	2	9.04e-05	0.25	YFDSGDYNMAK	K	A	0.97	2.81	0.572	1 310,5358
EC_212270_T33Vspike_8_A	cAMP-regulated phosphoprotein 19 OS=Bos taurus GN=ARPP19 PE=1 SV=2	ARP19_BOVIN,ARP19_CHICK,ARP19_HUMAN,ARP19_MOUSE,ARP19_TAEGU	12 353,4	0.985	1	1	3	0.000141	0.277	ARYPHLGQKPGGSDFLR	K	K	0.951	2.8	0.327	1 898,9986
EC_212270_T33Vspike_8_A	cAMP-regulated phosphoprotein 19 OS=Bos taurus GN=ARPP19 PE=1 SV=2	ARP19_BOVIN,ARP19_CHICK,ARP19_HUMAN,ARP19_MOUSE,ARP19_TAEGU	12 353,4	0.985	1	1	3	0.000141	0.277	GQKYFDSGDYNMAK	K	A	0.997	2.64	0.34	1 623,7109
EC_212270_T33Vspike_8_A	cAMP-regulated phosphoprotein 19 OS=Bos taurus GN=ARPP19 PE=1 SV=2	ARP19_BOVIN,ARP19_CHICK,ARP19_HUMAN,ARP19_MOUSE,ARP19_TAEGU	12 353,4	0.985	1	1	3	0.000141	0.277	YFDSGDYNMAK	K	A	0.997	3.04	0.628	1 310,5358
EC_212270_T33Vspike_9_A	cAMP-regulated phosphoprotein 19 OS=Bos taurus GN=ARPP19 PE=1 SV=2	ARP19_BOVIN,ARP19_CHICK,ARP19_HUMAN,ARP19_MOUSE,ARP19_TAEGU	12 353,4	0.994	1	1	3	0.000145	0.25	ARYPHLGQKPGGSDFLR	K	K	0.985	2.79	0.262	1 898,9986
EC_212270_T33Vspike_9_A	cAMP-regulated phosphoprotein 19 OS=Bos taurus GN=ARPP19 PE=1 SV=2	ARP19_BOVIN,ARP19_CHICK,ARP19_HUMAN,ARP19_MOUSE,ARP19_TAEGU	12 353,4	0.994	1	1	3	0.000145	0.25	YFDSGDYNMAK	K	A	0.997	2.8	0.338	1 310,5358
EC_212270_T33Vspike_2_A	ATP synthase subunit d, mitochondrial OS=Homo sapiens GN=ATP5H PE=1 SV=3	ATP5H_HUMAN	18 491,9	0.99	2	2	2	8.35e-05	0.205	AIASSLKSWNETLTSR	K	L	0.929	2.29	0.426	1 763,9286
EC_212270_T33Vspike_2_A	ATP synthase subunit d, mitochondrial OS=Homo sapiens GN=ATP5H PE=1 SV=3	ATP5H_HUMAN	18 491,9	0.99	2	2	2	8.35e-05	0.205	LAALPENPPAIDWAYYK	R	A	0.856	2.14	0.278	1 931,9903
EC_212270_T33Vspike_7_B	ATP synthase subunit d, mitochondrial OS=Homo sapiens GN=ATP5H PE=1 SV=3	ATP5H_HUMAN	18 491,9	1	2	3	3	0.000136	0.205	AIASSLKSWNETLTSR	K	L	0.997	3.84	0.563	1 763,9286
EC_212270_T33Vspike_7_B	ATP synthase subunit d, mitochondrial OS=Homo sapiens GN=ATP5H PE=1 SV=3	ATP5H_HUMAN	18 491,9	1	2	3	3	0.000136	0.205	LAALPENPPAIDWAYYK	R	A	0.771	1.83	0.274	1 931,9903
EC_212270_T33Vspike_1_A	ATP synthase subunit beta, mitochondrial OS=Homo sapiens GN=ATP5B PE=1 SV=3	ATPB_HUMAN,ATPB_MOUSE,ATPB_RAT	56 560,6	1	2	2	4	0.000172	0.0851	IMNVIGEPIDERGPIKTK	R	Q	0.832	2.64	0.126	2 010,1056
EC_212270_T33Vspike_1_A	ATP synthase subunit beta, mitochondrial OS=Homo sapiens GN=ATP5B PE=1 SV=3	ATPB_HUMAN,ATPB_MOUSE,ATPB_RAT	56 560,6	1	2	2	4	0.000172	0.0851	LVLEVAQHLGESTVR	R	T	0.997	3.97	0.427	1 650,9174
EC_212270_T33Vspike_1_A	ATP synthase subunit beta, mitochondrial OS=Homo sapiens GN=ATP5B PE=1 SV=3	ATPB_HUMAN,ATPB_MOUSE,ATPB_RAT	56 560,6	1	2	2	4	0.000172	0.0851	TIAMDGTEGLVR	R	G	0.977	3.11	0.13	1 262,6411
EC_212270_T33Vspike_1_B	ATP synthase subunit beta, mitochondrial OS=Homo sapiens GN=ATP5B PE=1 SV=3	ATPB_HUMAN,ATPB_MOUSE,ATPB_RAT	56 560,6	1	3	3	5	0.000227	0.144	ILQDYKSLQDIIAILGMDELSEEDKLTVSR	K	A	0.809	2.41	0.0827	3 435,7933
EC_212270_T33Vspike_1_B	ATP synthase subunit beta, mitochondrial OS=Homo sapiens GN=ATP5B PE=1 SV=3	ATPB_HUMAN,ATPB_MOUSE,ATPB_RAT	56 560,6	1	3	3	5	0.000227	0.144	LVLEVAQHLGESTVR	R	T	0.997	3.85	0.495	1 650,9174
EC_212270_T33Vspike_1_B	ATP synthase subunit beta, mitochondrial OS=Homo sapiens GN=ATP5B PE=1 SV=3	ATPB_HUMAN,ATPB_MOUSE,ATPB_RAT	56 560,6	1	3	3	5	0.000227	0.144	TIAMDGTEGLVR	R	G	0.995	2.99	0.14	1 262,6411
EC_212270_T33Vspike_1_B	ATP synthase subunit beta, mitochondrial OS=Homo sapiens GN=ATP5B PE=1 SV=3	ATPB_HUMAN,ATPB_MOUSE,ATPB_RAT	56 560,6	1	3	3	5	0.000227	0.144	VLDSGAPIKIPVGPETLGR	K	I	0.997	3.47	0.236	1 919,0964
EC_212270_T33Vspike_3_A	ATP synthase subunit beta, mitochondrial OS=Homo sapiens GN=ATP5B PE=1 SV=3	ATPB_HUMAN,ATPB_MOUSE,ATPB_RAT	56 560,6	1	4	4	5	0.000251	0.123	AIAELGIYPAVDPLDSTSR	R	I	0.317	1.81	0.165	1 988,0337
EC_212270_T33Vspike_3_A	ATP synthase subunit beta, mitochondrial OS=Homo sapiens GN=ATP5B PE=1 SV=3	ATPB_HUMAN,ATPB_MOUSE,ATPB_RAT	56 560,6	1	4	4	5	0.000251	0.123	LVLEVAQHLGESTVR	R	T	0.94	2.78	0.342	1 650,9174
EC_212270_T33Vspike_3_A	ATP synthase subunit beta, mitochondrial OS=Homo sapiens GN=ATP5B PE=1 SV=3	ATPB_HUMAN,ATPB_MOUSE,ATPB_RAT	56 560,6	1	4	4	5	0.000251	0.123	TIAMDGTEGLVR	R	G	0.197	1.42	0.0153	1 262,6411
EC_212270_T33Vspike_3_A	ATP synthase subunit beta, mitochondrial OS=Homo sapiens GN=ATP5B PE=1 SV=3	ATPB_HUMAN,ATPB_MOUSE,ATPB_RAT	56 560,6	1	4	4	5	0.000251	0.123	VLDSGAPIKIPVGPETLGR	K	I	0.997	3.8	0.388	1 919,0964
EC_212270_T33Vspike_3_B	ATP synthase subunit beta, mitochondrial OS=Homo sapiens GN=ATP5B PE=1 SV=3	ATPB_HUMAN,ATPB_MOUSE,ATPB_RAT	56 560,6	0.999	2	2	2	0.000105	0.0643	LVLEVAQHLGESTVR	R	T	0.487	2	0.164	1 650,9174
EC_212270_T33Vspike_3_B	ATP synthase subunit beta, mitochondrial OS=Homo sapiens GN=ATP5B PE=1 SV=3	ATPB_HUMAN,ATPB_MOUSE,ATPB_RAT	56 560,6	0.999	2	2	2	0.000105	0.0643	VLDSGAPIKIPVGPETLGR	K	I	0.997	3.6	0.433	1 919,0964
EC_212270_T33Vspike_4_A	ATP synthase subunit beta, mitochondrial OS=Homo sapiens GN=ATP5B PE=1 SV=3	ATPB_HUMAN,ATPB_MOUSE,ATPB_RAT	56 560,6	1	3	3	3	0.000121	0.087	LVLEVAQHLGESTVR	R	T	0.986	3.2	0.378	1 650,9174
EC_212270_T33Vspike_4_A	ATP synthase subunit beta, mitochondrial OS=Homo sapiens GN=ATP5B PE=1 SV=3	ATPB_HUMAN,ATPB_MOUSE,ATPB_RAT	56 560,6	1	3	3	3	0.000121	0.087	TIAMDGTEGLVR	R	G	0.971	3.08	0.185	1 262,6411
EC_212270_T33Vspike_4_A	ATP synthase subunit beta, mitochondrial OS=Homo sapiens GN=ATP5B PE=1 SV=3	ATPB_HUMAN,ATPB_MOUSE,ATPB_RAT	56 560,6	1	3	3	3	0.000121	0.087	VLDSGAPIKIPVGPETLGR	K	I	0.997	3.35	0.485	1 919,0964
EC_212270_T33Vspike_4_B	ATP synthase subunit beta, mitochondrial OS=Homo sapiens GN=ATP5B PE=1 SV=3	ATPB_HUMAN,ATPB_MOUSE,ATPB_RAT	56 560,6	1	3	4	4	0.000159	0.087	LVLEVAQHLGESTVR	R	T	0.997	3.73	0.412	1 650,9174
EC_212270_T33Vspike_4_B	ATP synthase subunit beta, mitochondrial OS=Homo sapiens GN=ATP5B PE=1 SV=3	ATPB_HUMAN,ATPB_MOUSE,ATPB_RAT	56 560,6	1	3	4	4	0.000159	0.087	TIAMDGTEGLVR	R	G	0.987	3.32	0.227	1 262,6411
EC_212270_T33Vspike_4_B	ATP synthase subunit beta, mitochondrial OS=Homo sapiens GN=ATP5B PE=1 SV=3	ATPB_HUMAN,ATPB_MOUSE,ATPB_RAT	56 560,6	1	3	4	4	0.000159	0.087	VLDSGAPIKIPVGPETLGR	K	I	0.997	3.49	0.354	1 919,0964
EC_212270_T33Vspike_6_A	ATP synthase subunit beta, mitochondrial OS=Homo sapiens GN=ATP5B PE=1 SV=3	ATPB_HUMAN,ATPB_MOUSE,ATPB_RAT	56 560,6	1	2	2	2	0.000111	0.0643	LVLEVAQHLGESTVR	R	T	0.997	3.13	0.552	1 650,9174
EC_212270_T33Vspike_6_A	ATP synthase subunit beta, mitochondrial OS=Homo sapiens GN=ATP5B PE=1 SV=3	ATPB_HUMAN,ATPB_MOUSE,ATPB_RAT	56 560,6	1	2	2	2	0.000111	0.0643	VLDSGAPIKIPVGPETLGR	K	I	0.997	3.81	0.421	1 919,0964
EC_212270_T33Vspike_6_B	ATP synthase subunit beta, mitochondrial OS=Homo sapiens GN=ATP5B PE=1 SV=3	ATPB_HUMAN,ATPB_MOUSE,ATPB_RAT	56 560,6	1	2	2	3	0.00018	0.0643	LVLEVAQHLGESTVR	R	T	0.997	3.14	0.555	1 650,9174
EC_212270_T33Vspike_6_B	ATP synthase subunit beta, mitochondrial OS=Homo sapiens GN=ATP5B PE=1 SV=3	ATPB_HUMAN,ATPB_MOUSE,ATPB_RAT	56 560,6	1	2	2	3	0.00018	0.0643	VLDSGAPIKIPVGPETLGR	K	I	0.997	4.03	0.475	1 919,0964
EC_212270_T33Vspike_8_A	ATP synthase subunit beta, mitochondrial OS=Homo sapiens GN=ATP5B PE=1 SV=3	ATPB_HUMAN,ATPB_MOUSE,ATPB_RAT	56 560,6	1	1	1	2	9.39e-05	0.0643	LVLEVAQHLGESTVR	R	T	0.997	3.58	0.527	1 650,9174
EC_212270_T33Vspike_8_A	ATP synthase subunit beta, mitochondrial OS=Homo sapiens GN=ATP5B PE=1 SV=3	ATPB_HUMAN,ATPB_MOUSE,ATPB_RAT	56 560,6	1	1	1	2	9.39e-05	0.0643	VLDSGAPIKIPVGPETLGR	K	I	0.997	3.84	0.439	1 919,0964
EC_212270_T33Vspike_8_B	ATP synthase subunit beta, mitochondrial OS=Homo sapiens GN=ATP5B PE=1 SV=3	ATPB_HUMAN,ATPB_MOUSE,ATPB_RAT	56 560,6	1	1	1	4	0.000192	0.0643	LVLEVAQHLGESTVR	R	T	0.997	3.92	0.549	1 650,9174
EC_212270_T33Vspike_8_B	ATP synthase subunit beta, mitochondrial OS=Homo sapiens GN=ATP5B PE=1 SV=3	ATPB_HUMAN,ATPB_MOUSE,ATPB_RAT	56 560,6	1	1	1	4	0.000192	0.0643	VLDSGAPIKIPVGPETLGR	K	I	0.997	3.63	0.351	1 919,0964
EC_212270_T33Vspike_9_A	ATP synthase subunit beta, mitochondrial OS=Homo sapiens GN=ATP5B PE=1 SV=3	ATPB_HUMAN,ATPB_MOUSE,ATPB_RAT	56 301,2	1	3	3	3	0.000145	0.087	LVLEVAQHLGESTVR	R	T	0.985	2.7	0.461	1 650,9174
EC_212270_T33Vspike_9_A	ATP synthase subunit beta, mitochondrial OS=Homo sapiens GN=ATP5B PE=1 SV=3	ATPB_HUMAN,ATPB_MOUSE,ATPB_RAT	56 301,2	1	3	3	3	0.000145	0.087	TIAMDGTEGLVR	R	G	0.918	2.21	0.285	1 262,6411
EC_212270_T33Vspike_9_A	ATP synthase subunit beta, mitochondrial OS=Homo sapiens GN=ATP5B PE=1 SV=3	ATPB_HUMAN,ATPB_MOUSE,ATPB_RAT	56 301,2	1	3	3	3	0.000145	0.087	VLDSGAPIKIPVGPETLGR	K	I	0.997	3.94	0.509	1 919,0964
EC_212270_T33Vspike_9_B	ATP synthase subunit beta, mitochondrial OS=Homo sapiens GN=ATP5B PE=1 SV=3	ATPB_HUMAN,ATPB_MOUSE,ATPB_RAT	56 560,6	1	2	2	2	0.000103	0.0643	LVLEVAQHLGESTVR	R	T	0.992	2.63	0.553	1 650,9174
EC_212270_T33Vspike_9_B	ATP synthase subunit beta, mitochondrial OS=Homo sapiens GN=ATP5B PE=1 SV=3	ATPB_HUMAN,ATPB_MOUSE,ATPB_RAT	56 560,6	1	2	2	2	0.000103	0.0643	VLDSGAPIKIPVGPETLGR	K	I	0.997	4.06	0.452	1 919,0964
EC_212270_T33Vspike_11_B	ATP synthase subunit beta, mitochondrial OS=Homo sapiens GN=ATP5B PE=1 SV=3	ATPB_HUMAN,ATPB_MOUSE,ATPB_RAT	56 560,6	1	2	2	2	9.31e-05	0.0643	LVLEVAQHLGESTVR	R	T	0.997	3.94	0.593	1 650,9174
EC_212270_T33Vspike_11_B	ATP synthase subunit beta, mitochondrial OS=Homo sapiens GN=ATP5B PE=1 SV=3	ATPB_HUMAN,ATPB_MOUSE,ATPB_RAT	56 560,6	1	2	2	2	9.31e-05	0.0643	VLDSGAPIKIPVGPETLGR	K	I	0.997	3.57	0.265	1 919,0964
EC_212270_T33Vspike_12_B	ATP synthase subunit beta, mitochondrial OS=Homo sapiens GN=ATP5B PE=1 SV=3	ATPB_HUMAN,ATPB_MOUSE,ATPB_RAT	56 560,6	1	3	4	5	0.000267	0.1	AIAELGIYPAVDPLDSTSR	R	I	0.556	2.44	0.0219	1 988,0337
EC_212270_T33Vspike_12_B	ATP synthase subunit beta, mitochondrial OS=Homo sapiens GN=ATP5B PE=1 SV=3	ATPB_HUMAN,ATPB_MOUSE,ATPB_RAT	56 560,6	1	3	4	5	0.000267	0.1	LVLEVAQHLGESTVR	R	T	0.997	3.08	0.507	1 650,9174
EC_212270_T33Vspike_12_B	ATP synthase subunit beta, mitochondrial OS=Homo sapiens GN=ATP5B PE=1 SV=3	ATPB_HUMAN,ATPB_MOUSE,ATPB_RAT	56 560,6	1	3	4	5	0.000267	0.1	VLDSGAPIKIPVGPETLGR	K	I	0.997	3.9	0.46	1 919,0964
EC_212270_T33Vspike_2_A	ATP synthase subunit beta, mitochondrial OS=Homo sapiens GN=ATP5B PE=1 SV=3	ATPB_HUMAN,ATPB_RAT	56 560,6	1	2	3	4	0.000167	0.087	LVLEVAQHLGESTVR	R	T	0.859	2.06	0.312	1 650,9174
EC_212270_T33Vspike_2_A	ATP synthase subunit beta, mitochondrial OS=Homo sapiens GN=ATP5B PE=1 SV=3	ATPB_HUMAN,ATPB_RAT	56 560,6	1	2	3	4	0.000167	0.087	TIAMDGTEGLVR	R	G	0.983	2.84	0.304	1 262,6411
EC_212270_T33Vspike_2_A	ATP synthase subunit beta, mitochondrial OS=Homo sapiens GN=ATP5B PE=1 SV=3	ATPB_HUMAN,ATPB_RAT	56 560,6	1	2	3	4	0.000167	0.087	VLDSGAPIKIPVGPETLGR	K	I	0.997	4.04	0.432	1 919,0964
EC_212270_T33Vspike_2_B	ATP synthase subunit beta, mitochondrial OS=Homo sapiens GN=ATP5B PE=1 SV=3	ATPB_HUMAN,ATPB_RAT	56 560,6	1	2	3	4	0.000174	0.087	LVLEVAQHLGESTVR	R	T	0.963	2.52	0.333	1 650,9174
EC_212270_T33Vspike_2_B	ATP synthase subunit beta, mitochondrial OS=Homo sapiens GN=ATP5B PE=1 SV=3	ATPB_HUMAN,ATPB_RAT	56 560,6	1	2	3	4	0.000174	0.087	TIAMDGTEGLVR	R	G	0.988	3.17	0.148	1 262,6411
EC_212270_T33Vspike_2_B	ATP synthase subunit beta, mitochondrial OS=Homo sapiens GN=ATP5B PE=1 SV=3	ATPB_HUMAN,ATPB_RAT	56 560,6	1	2	3	4	0.000174	0.087	VLDSGAPIKIPVGPETLGR	K	I	0.997	4.24	0.448	1 919,0964
EC_212270_T33Vspike_7_A	ATP synthase subunit beta, mitochondrial OS=Homo sapiens GN=ATP5B PE=1 SV=3	ATPB_HUMAN,ATPB_RAT	56 560,6	1	3	5	7	0.000316	0.0983	IMNVIGEPIDERGPIKTK	R	Q	0.897	1.97	0.0478	2 010,1056
EC_212270_T33Vspike_7_A	ATP synthase subunit beta, mitochondrial OS=Homo sapiens GN=ATP5B PE=1 SV=3	ATPB_HUMAN,ATPB_RAT	56 560,6	1	3	5	7	0.000316	0.0983	LVLEVAQHLGESTVR	R	T	0.997	4.17	0.566	1 650,9174
EC_212270_T33Vspike_7_A	ATP synthase subunit beta, mitochondrial OS=Homo sapiens GN=ATP5B PE=1 SV=3	ATPB_HUMAN,ATPB_RAT	56 560,6	1	3	5	7	0.000316	0.0983	VLDSGAPIKIPVGPETLGR	K	I	0.997	4.46	0.426	1 919,0964
EC_212270_T33Vspike_7_B	ATP synthase subunit beta, mitochondrial OS=Homo sapiens GN=ATP5B PE=1 SV=3	ATPB_HUMAN,ATPB_RAT	56 560,6	1	4	4	4	0.000182	0.127	IMNVIGEPIDERGPIKTK	R	Q	0.777	2.39	0.216	2 010,1056
EC_212270_T33Vspike_7_B	ATP synthase subunit beta, mitochondrial OS=Homo sapiens GN=ATP5B PE=1 SV=3	ATPB_HUMAN,ATPB_RAT	56 560,6	1	4	4	4	0.000182	0.127	LVLEVAQHLGESTVR	R	T	0.997	4.08	0.485	1 650,9174
EC_212270_T33Vspike_7_B	ATP synthase subunit beta, mitochondrial OS=Homo sapiens GN=ATP5B PE=1 SV=3	ATPB_HUMAN,ATPB_RAT	56 560,6	1	4	4	4	0.000182	0.127	TIAMDGTEGLVRGQK	R	V	0.969	2.72	0.401	1 575,8162
EC_212270_T33Vspike_7_B	ATP synthase subunit beta, mitochondrial OS=Homo sapiens GN=ATP5B PE=1 SV=3	ATPB_HUMAN,ATPB_RAT	56 560,6	1	4	4	4	0.000182	0.127	VLDSGAPIKIPVGPETLGR	K	I	0.997	3.71	0.339	1 919,0964
EC_212270_T33Vspike_5_A	ATP synthase subunit beta, mitochondrial OS=Mus musculus GN=Atp5b PE=1 SV=2	ATPB_MOUSE	56 301,2	1	2	2	2	8.45e-05	0.0567	LVLEVAQHLGESTVR	R	T	0.997	3.71	0.508	1 650,9174
EC_212270_T33Vspike_5_A	ATP synthase subunit beta, mitochondrial OS=Mus musculus GN=Atp5b PE=1 SV=2	ATPB_MOUSE	56 301,2	1	2	2	2	8.45e-05	0.0567	TIAMDGTEGLVRGQK	R	V	0.903	2.5	0.435	1 575,8162
EC_212270_T33Vspike_5_B	ATP synthase subunit beta, mitochondrial OS=Mus musculus GN=Atp5b PE=1 SV=2	ATPB_MOUSE	56 301,2	1	2	3	4	0.000204	0.0643	LVLEVAQHLGESTVR	R	T	0.997	4.08	0.565	1 650,9174
EC_212270_T33Vspike_5_B	ATP synthase subunit beta, mitochondrial OS=Mus musculus GN=Atp5b PE=1 SV=2	ATPB_MOUSE	56 301,2	1	2	3	4	0.000204	0.0643	VLDSGAPIKIPVGPETLGR	K	I	0.997	3.35	0.397	1 919,0964
EC_212270_T33Vspike_3_A	Barrier-to-autointegration factor OS=Bos taurus GN=BANF1 PE=3 SV=1	BAF_BOVIN	10 058,7	0.998	2	2	4	0.000201	0.449	DCFGCLREWCDAFL	R	-	0.946	2.5	0.453	1 848,7504
EC_212270_T33Vspike_3_A	Barrier-to-autointegration factor OS=Bos taurus GN=BANF1 PE=3 SV=1	BAF_BOVIN	10 058,7	0.998	2	2	4	0.000201	0.449	HRDFVAEPMGEKPVGSLAGIGEVLGK	K	K	0.965	3.05	0.0946	2 693,4083
EC_212270_T33Vspike_2_A	Basigin (Fragment) OS=Bos taurus GN=BSG PE=2 SV=1	BASI_BOVIN,BASI_HUMAN	22 118,8	0.997	2	2	2	8.35e-05	0.122	FFVSSSQGR	R	S	0.956	2.38	0.374	1 014,5002
EC_212270_T33Vspike_2_A	Basigin (Fragment) OS=Bos taurus GN=BSG PE=2 SV=1	BASI_BOVIN,BASI_HUMAN	22 118,8	0.997	2	2	2	8.35e-05	0.122	SSEHINEGETAMLVCK	K	S	0.927	2.45	0.291	1 804,8205
EC_212270_T33Vspike_2_A	Bcl-2-associated transcription factor 1 OS=Homo sapiens GN=BCLAF1 PE=1 SV=2	BCLF1_HUMAN	106 125,3	0.997	2	2	2	8.35e-05	0.037	LLASTLVHSVKKEQEFR	R	S	0.886	2.34	0.268	1 985,1179
EC_212270_T33Vspike_2_A	Bcl-2-associated transcription factor 1 OS=Homo sapiens GN=BCLAF1 PE=1 SV=2	BCLF1_HUMAN	106 125,3	0.997	2	2	2	8.35e-05	0.037	SSFYPDGGDQETAKTGK	R	F	0.959	2.4	0.442	1 787,8085
EC_212270_T33Vspike_2_B	Bcl-2-associated transcription factor 1 OS=Homo sapiens GN=BCLAF1 PE=1 SV=2	BCLF1_HUMAN	106 125,3	1	3	3	3	0.000131	0.0533	LLASTLVHSVKKEQEFR	R	S	0.913	2.42	0.283	1 985,1179
EC_212270_T33Vspike_2_B	Bcl-2-associated transcription factor 1 OS=Homo sapiens GN=BCLAF1 PE=1 SV=2	BCLF1_HUMAN	106 125,3	1	3	3	3	0.000131	0.0533	SFATASHRNTEEEGLKYK	K	S	0.985	2.79	0.352	2 068,0094
EC_212270_T33Vspike_2_B	Bcl-2-associated transcription factor 1 OS=Homo sapiens GN=BCLAF1 PE=1 SV=2	BCLF1_HUMAN	106 125,3	1	3	3	3	0.000131	0.0533	SSFYPDGGDQETAK	R	T	0.81	1.5	0.319	1 501,6443
EC_212270_T33Vspike_1_A	BH3-interacting domain death agonist OS=Homo sapiens GN=BID PE=1 SV=1	BID_HUMAN	21 995,3	1	2	2	2	8.61e-05	0.159	HLAQVGDSMDR	R	S	0.906	2.14	0.421	1 228,5740
EC_212270_T33Vspike_1_A	BH3-interacting domain death agonist OS=Homo sapiens GN=BID PE=1 SV=1	BID_HUMAN	21 995,3	1	2	2	2	8.61e-05	0.159	LGRIEADSESQEDIIRNIAR	R	H	0.997	3.48	0.359	2 285,1846
EC_212270_T33Vspike_4_A	BolA-like protein 2 OS=Homo sapiens GN=BOLA2 PE=1 SV=1	BOLA2_HUMAN	10 116,4	0.999	2	2	2	8.05e-05	0.372	DLEAEHVEVEDTTLNR	R	C	0.963	2.8	0.401	1 869,8826
EC_212270_T33Vspike_4_A	BolA-like protein 2 OS=Homo sapiens GN=BOLA2 PE=1 SV=1	BOLA2_HUMAN	10 116,4	0.999	2	2	2	8.05e-05	0.372	VLVVSAKFEGKPLLQR	R	H	0.978	2.78	0.509	1 784,0794
EC_212270_T33Vspike_1_A	Pancreatic trypsin inhibitor OS=Bos taurus PE=1 SV=2	BPT1_BOVIN	10 903,1	1	4	7	18	0.000774	0.34	AGLCQTFVYGGCR	K	A	0.997	4.08	0.513	1 488,6724
EC_212270_T33Vspike_1_A	Pancreatic trypsin inhibitor OS=Bos taurus PE=1 SV=2	BPT1_BOVIN	10 903,1	1	4	7	18	0.000774	0.34	IIRYFYNAK	R	A	0.986	3.05	0.342	1 187,6571
EC_212270_T33Vspike_1_A	Pancreatic trypsin inhibitor OS=Bos taurus PE=1 SV=2	BPT1_BOVIN	10 903,1	1	4	7	18	0.000774	0.34	NNFKSAEDCMR	R	T	0.983	3.01	0.57	1 371,5780
EC_212270_T33Vspike_1_A	Pancreatic trypsin inhibitor OS=Bos taurus PE=1 SV=2	BPT1_BOVIN	10 903,1	1	4	7	18	0.000774	0.34	RNNFKSAEDCMR	K	T	0.805	2.29	0.307	1 527,6791
EC_212270_T33Vspike_1_B	Pancreatic trypsin inhibitor OS=Bos taurus PE=1 SV=2	BPT1_BOVIN	10 903,1	1	3	5	15	0.000682	0.25	AGLCQTFVYGGCR	K	A	0.997	4.01	0.527	1 488,6724
EC_212270_T33Vspike_1_B	Pancreatic trypsin inhibitor OS=Bos taurus PE=1 SV=2	BPT1_BOVIN	10 903,1	1	3	5	15	0.000682	0.25	NNFKSAEDCMR	R	T	0.942	2.42	0.352	1 371,5780
EC_212270_T33Vspike_1_B	Pancreatic trypsin inhibitor OS=Bos taurus PE=1 SV=2	BPT1_BOVIN	10 903,1	1	3	5	15	0.000682	0.25	RNNFKSAEDCMR	K	T	0.997	3.07	0.37	1 470,6576
EC_212270_T33Vspike_1_B	Pancreatic trypsin inhibitor OS=Bos taurus PE=1 SV=2	BPT1_BOVIN	10 903,1	1	3	5	15	0.000682	0.25	SAEDCMR	K	T	0.9	1.88	0.498	811.307
EC_212270_T33Vspike_2_A	Pancreatic trypsin inhibitor OS=Bos taurus PE=1 SV=2	BPT1_BOVIN	10 903,1	1	5	8	16	0.000668	0.34	AGLCQTFVYGGCR	K	A	0.997	3.86	0.551	1 488,6724
EC_212270_T33Vspike_2_A	Pancreatic trypsin inhibitor OS=Bos taurus PE=1 SV=2	BPT1_BOVIN	10 903,1	1	5	8	16	0.000668	0.34	IIRYFYNAK	R	A	0.945	2.76	0.283	1 187,6571
EC_212270_T33Vspike_2_A	Pancreatic trypsin inhibitor OS=Bos taurus PE=1 SV=2	BPT1_BOVIN	10 903,1	1	5	8	16	0.000668	0.34	NNFKSAEDCMR	R	T	0.945	2.35	0.419	1 371,5780
EC_212270_T33Vspike_2_A	Pancreatic trypsin inhibitor OS=Bos taurus PE=1 SV=2	BPT1_BOVIN	10 903,1	1	5	8	16	0.000668	0.34	RNNFKSAEDCMR	K	T	0.967	2.88	0.313	1 470,6576
EC_212270_T33Vspike_2_A	Pancreatic trypsin inhibitor OS=Bos taurus PE=1 SV=2	BPT1_BOVIN	10 903,1	1	5	8	16	0.000668	0.34	YFYNAKAGLCQTFVYGGCR	R	A	0.878	2.39	0.201	2 275,0424
EC_212270_T33Vspike_2_B	Pancreatic trypsin inhibitor OS=Bos taurus PE=1 SV=2	BPT1_BOVIN	10 903,1	1	3	9	18	0.000784	0.25	AGLCQTFVYGGCR	K	A	0.997	3.97	0.482	1 488,6724
EC_212270_T33Vspike_2_B	Pancreatic trypsin inhibitor OS=Bos taurus PE=1 SV=2	BPT1_BOVIN	10 903,1	1	3	9	18	0.000784	0.25	NNFKSAEDCMR	R	T	0.965	2.52	0.519	1 371,5780
EC_212270_T33Vspike_2_B	Pancreatic trypsin inhibitor OS=Bos taurus PE=1 SV=2	BPT1_BOVIN	10 903,1	1	3	9	18	0.000784	0.25	RNNFKSAEDCMR	K	T	0.997	2.85	0.378	1 470,6576
EC_212270_T33Vspike_3_A	Pancreatic trypsin inhibitor OS=Bos taurus PE=1 SV=2	BPT1_BOVIN	10 903,1	1	4	10	23	0.00116	0.34	AGLCQTFVYGGCR	K	A	0.997	4.04	0.522	1 431,6509
EC_212270_T33Vspike_3_A	Pancreatic trypsin inhibitor OS=Bos taurus PE=1 SV=2	BPT1_BOVIN	10 903,1	1	4	10	23	0.00116	0.34	IIRYFYNAK	R	A	0.276	1.66	0.0755	1 187,6571
EC_212270_T33Vspike_3_A	Pancreatic trypsin inhibitor OS=Bos taurus PE=1 SV=2	BPT1_BOVIN	10 903,1	1	4	10	23	0.00116	0.34	NNFKSAEDCMR	R	T	0.952	2.33	0.43	1 371,5780
EC_212270_T33Vspike_3_A	Pancreatic trypsin inhibitor OS=Bos taurus PE=1 SV=2	BPT1_BOVIN	10 903,1	1	4	10	23	0.00116	0.34	RNNFKSAEDCMR	K	T	0.52	1.83	0.262	1 470,6576
EC_212270_T33Vspike_3_A	Pancreatic trypsin inhibitor OS=Bos taurus PE=1 SV=2	BPT1_BOVIN	10 903,1	1	4	10	23	0.00116	0.34	YFYNAK	R	A	0.342	1.31	0.209	805.388
EC_212270_T33Vspike_3_B	Pancreatic trypsin inhibitor OS=Bos taurus PE=1 SV=2	BPT1_BOVIN	10 903,1	1	4	9	20	0.00105	0.34	AGLCQTFVYGGCR	K	A	0.997	3.53	0.526	1 488,6724
EC_212270_T33Vspike_3_B	Pancreatic trypsin inhibitor OS=Bos taurus PE=1 SV=2	BPT1_BOVIN	10 903,1	1	4	9	20	0.00105	0.34	IIRYFYNAK	R	A	0.758	2.27	0.247	1 187,6571
EC_212270_T33Vspike_3_B	Pancreatic trypsin inhibitor OS=Bos taurus PE=1 SV=2	BPT1_BOVIN	10 903,1	1	4	9	20	0.00105	0.34	NNFKSAEDCMR	R	T	0.916	2.34	0.514	1 371,5780
EC_212270_T33Vspike_3_B	Pancreatic trypsin inhibitor OS=Bos taurus PE=1 SV=2	BPT1_BOVIN	10 903,1	1	4	9	20	0.00105	0.34	RNNFKSAEDCMR	K	T	0.997	2.93	0.404	1 527,6791
EC_212270_T33Vspike_3_B	Pancreatic trypsin inhibitor OS=Bos taurus PE=1 SV=2	BPT1_BOVIN	10 903,1	1	4	9	20	0.00105	0.34	YFYNAK	R	A	0.078	0.865	0	805.388
EC_212270_T33Vspike_4_A	Pancreatic trypsin inhibitor OS=Bos taurus PE=1 SV=2	BPT1_BOVIN	10 903,1	1	4	6	10	0.000403	0.34	AGLCQTFVYGGCR	K	A	0.997	4.12	0.469	1 488,6724
EC_212270_T33Vspike_4_A	Pancreatic trypsin inhibitor OS=Bos taurus PE=1 SV=2	BPT1_BOVIN	10 903,1	1	4	6	10	0.000403	0.34	IIRYFYNAK	R	A	0.935	2.61	0.3	1 187,6571
EC_212270_T33Vspike_4_A	Pancreatic trypsin inhibitor OS=Bos taurus PE=1 SV=2	BPT1_BOVIN	10 903,1	1	4	6	10	0.000403	0.34	NNFKSAEDCMR	R	T	0.911	2.21	0.547	1 387,5729
EC_212270_T33Vspike_4_A	Pancreatic trypsin inhibitor OS=Bos taurus PE=1 SV=2	BPT1_BOVIN	10 903,1	1	4	6	10	0.000403	0.34	RNNFKSAEDCMR	K	T	0.997	2.91	0.396	1 527,6791
EC_212270_T33Vspike_4_B	Pancreatic trypsin inhibitor OS=Bos taurus PE=1 SV=2	BPT1_BOVIN	10 903,1	1	4	6	13	0.000516	0.34	AGLCQTFVYGGCR	K	A	0.997	4.19	0.497	1 488,6724
EC_212270_T33Vspike_4_B	Pancreatic trypsin inhibitor OS=Bos taurus PE=1 SV=2	BPT1_BOVIN	10 903,1	1	4	6	13	0.000516	0.34	IIRYFYNAK	R	A	0.908	2.65	0.283	1 187,6571
EC_212270_T33Vspike_4_B	Pancreatic trypsin inhibitor OS=Bos taurus PE=1 SV=2	BPT1_BOVIN	10 903,1	1	4	6	13	0.000516	0.34	NNFKSAEDCMR	R	T	0.911	2.17	0.415	1 371,5780
EC_212270_T33Vspike_4_B	Pancreatic trypsin inhibitor OS=Bos taurus PE=1 SV=2	BPT1_BOVIN	10 903,1	1	4	6	13	0.000516	0.34	RNNFKSAEDCMR	K	T	0.943	2.72	0.434	1 527,6791
EC_212270_T33Vspike_5_A	Pancreatic trypsin inhibitor OS=Bos taurus PE=1 SV=2	BPT1_BOVIN	10 903,1	1	2	3	9	0.00038	0.24	AGLCQTFVYGGCR	K	A	0.997	4.07	0.475	1 488,6724
EC_212270_T33Vspike_5_A	Pancreatic trypsin inhibitor OS=Bos taurus PE=1 SV=2	BPT1_BOVIN	10 903,1	1	2	3	9	0.00038	0.24	NNFKSAEDCMR	R	T	0.941	2.22	0.369	1 371,5780
EC_212270_T33Vspike_5_B	Pancreatic trypsin inhibitor OS=Bos taurus PE=1 SV=2	BPT1_BOVIN	10 903,1	1	4	7	17	0.000867	0.34	AGLCQTFVYGGCR	K	A	0.997	3.63	0.51	1 488,6724
EC_212270_T33Vspike_5_B	Pancreatic trypsin inhibitor OS=Bos taurus PE=1 SV=2	BPT1_BOVIN	10 903,1	1	4	7	17	0.000867	0.34	IIRYFYNAK	R	A	0.948	2.42	0.365	1 187,6571
EC_212270_T33Vspike_5_B	Pancreatic trypsin inhibitor OS=Bos taurus PE=1 SV=2	BPT1_BOVIN	10 903,1	1	4	7	17	0.000867	0.34	NNFKSAEDCMR	R	T	0.97	2.68	0.495	1 371,5780
EC_212270_T33Vspike_5_B	Pancreatic trypsin inhibitor OS=Bos taurus PE=1 SV=2	BPT1_BOVIN	10 903,1	1	4	7	17	0.000867	0.34	RNNFKSAEDCMR	K	T	0.985	2.92	0.38	1 527,6791
EC_212270_T33Vspike_6_A	Pancreatic trypsin inhibitor OS=Bos taurus PE=1 SV=2	BPT1_BOVIN	10 903,1	1	3	3	6	0.000332	0.25	AGLCQTFVYGGCR	K	A	0.997	3.58	0.529	1 488,6724
EC_212270_T33Vspike_6_A	Pancreatic trypsin inhibitor OS=Bos taurus PE=1 SV=2	BPT1_BOVIN	10 903,1	1	3	3	6	0.000332	0.25	NNFKSAEDCMR	R	T	0.933	2.68	0.489	1 371,5780
EC_212270_T33Vspike_6_A	Pancreatic trypsin inhibitor OS=Bos taurus PE=1 SV=2	BPT1_BOVIN	10 903,1	1	3	3	6	0.000332	0.25	RNNFKSAEDCMR	K	T	0.997	2.88	0.462	1 527,6791
EC_212270_T33Vspike_6_B	Pancreatic trypsin inhibitor OS=Bos taurus PE=1 SV=2	BPT1_BOVIN	10 903,1	1	3	5	10	0.000599	0.25	AGLCQTFVYGGCR	K	A	0.997	4.59	0.447	1 488,6724
EC_212270_T33Vspike_6_B	Pancreatic trypsin inhibitor OS=Bos taurus PE=1 SV=2	BPT1_BOVIN	10 903,1	1	3	5	10	0.000599	0.25	NNFKSAEDCMR	R	T	0.985	2.78	0.459	1 371,5780
EC_212270_T33Vspike_6_B	Pancreatic trypsin inhibitor OS=Bos taurus PE=1 SV=2	BPT1_BOVIN	10 903,1	1	3	5	10	0.000599	0.25	RNNFKSAEDCMR	K	T	0.997	3.11	0.375	1 527,6791
EC_212270_T33Vspike_7_A	Pancreatic trypsin inhibitor OS=Bos taurus PE=1 SV=2	BPT1_BOVIN	10 903,1	1	2	3	7	0.000316	0.24	AGLCQTFVYGGCR	K	A	0.997	3.89	0.463	1 488,6724
EC_212270_T33Vspike_7_A	Pancreatic trypsin inhibitor OS=Bos taurus PE=1 SV=2	BPT1_BOVIN	10 903,1	1	2	3	7	0.000316	0.24	NNFKSAEDCMR	R	T	0.816	1.8	0.398	1 371,5780
EC_212270_T33Vspike_7_B	Pancreatic trypsin inhibitor OS=Bos taurus PE=1 SV=2	BPT1_BOVIN	10 903,1	1	2	3	6	0.000273	0.25	AGLCQTFVYGGCR	K	A	0.997	3.65	0.519	1 488,6724
EC_212270_T33Vspike_7_B	Pancreatic trypsin inhibitor OS=Bos taurus PE=1 SV=2	BPT1_BOVIN	10 903,1	1	2	3	6	0.000273	0.25	RNNFKSAEDCMR	K	T	0.997	2.73	0.416	1 527,6791
EC_212270_T33Vspike_8_A	Pancreatic trypsin inhibitor OS=Bos taurus PE=1 SV=2	BPT1_BOVIN	10 903,1	1	4	5	13	0.00061	0.31	AGLCQTFVYGGCR	K	A	0.997	4.07	0.49	1 488,6724
EC_212270_T33Vspike_8_A	Pancreatic trypsin inhibitor OS=Bos taurus PE=1 SV=2	BPT1_BOVIN	10 903,1	1	4	5	13	0.00061	0.31	NNFKSAEDCMR	R	T	0.898	2.17	0.489	1 387,5729
EC_212270_T33Vspike_8_A	Pancreatic trypsin inhibitor OS=Bos taurus PE=1 SV=2	BPT1_BOVIN	10 903,1	1	4	5	13	0.00061	0.31	RNNFKSAEDCMR	K	T	0.997	3.36	0.478	1 527,6791
EC_212270_T33Vspike_8_A	Pancreatic trypsin inhibitor OS=Bos taurus PE=1 SV=2	BPT1_BOVIN	10 903,1	1	4	5	13	0.00061	0.31	YFYNAKAGLCQTFVYGGCR	R	A	0.964	2.67	0.329	2 275,0424
EC_212270_T33Vspike_8_B	Pancreatic trypsin inhibitor OS=Bos taurus PE=1 SV=2	BPT1_BOVIN	10 903,1	1	2	3	11	0.000527	0.25	AGLCQTFVYGGCR	K	A	0.997	3.87	0.476	1 488,6724
EC_212270_T33Vspike_8_B	Pancreatic trypsin inhibitor OS=Bos taurus PE=1 SV=2	BPT1_BOVIN	10 903,1	1	2	3	11	0.000527	0.25	RNNFKSAEDCMR	K	T	0.997	3.62	0.422	1 527,6791
EC_212270_T33Vspike_9_A	Pancreatic trypsin inhibitor OS=Bos taurus PE=1 SV=2	BPT1_BOVIN	10 903,1	1	3	5	11	0.000533	0.25	AGLCQTFVYGGCR	K	A	0.997	3.87	0.524	1 488,6724
EC_212270_T33Vspike_9_A	Pancreatic trypsin inhibitor OS=Bos taurus PE=1 SV=2	BPT1_BOVIN	10 903,1	1	3	5	11	0.000533	0.25	NNFKSAEDCMR	R	T	0.947	2.38	0.341	1 371,5780
EC_212270_T33Vspike_9_A	Pancreatic trypsin inhibitor OS=Bos taurus PE=1 SV=2	BPT1_BOVIN	10 903,1	1	3	5	11	0.000533	0.25	RNNFKSAEDCMR	K	T	0.997	3.31	0.418	1 527,6791
EC_212270_T33Vspike_9_B	Pancreatic trypsin inhibitor OS=Bos taurus PE=1 SV=2	BPT1_BOVIN	10 903,1	1	3	5	9	0.000464	0.25	AGLCQTFVYGGCR	K	A	0.997	3.55	0.519	1 488,6724
EC_212270_T33Vspike_9_B	Pancreatic trypsin inhibitor OS=Bos taurus PE=1 SV=2	BPT1_BOVIN	10 903,1	1	3	5	9	0.000464	0.25	NNFKSAEDCMR	R	T	0.952	2.26	0.59	1 371,5780
EC_212270_T33Vspike_9_B	Pancreatic trypsin inhibitor OS=Bos taurus PE=1 SV=2	BPT1_BOVIN	10 903,1	1	3	5	9	0.000464	0.25	RNNFKSAEDCMR	K	T	0.997	3.72	0.498	1 527,6791
EC_212270_T33Vspike_10_A	Pancreatic trypsin inhibitor OS=Bos taurus PE=1 SV=2	BPT1_BOVIN	10 903,1	1	3	4	10	0.000542	0.25	AGLCQTFVYGGCR	K	A	0.997	4.33	0.445	1 488,6724
EC_212270_T33Vspike_10_A	Pancreatic trypsin inhibitor OS=Bos taurus PE=1 SV=2	BPT1_BOVIN	10 903,1	1	3	4	10	0.000542	0.25	NNFKSAEDCMR	R	T	0.784	1.78	0.413	1 371,5780
EC_212270_T33Vspike_10_A	Pancreatic trypsin inhibitor OS=Bos taurus PE=1 SV=2	BPT1_BOVIN	10 903,1	1	3	4	10	0.000542	0.25	RNNFKSAEDCMR	K	T	0.969	2.59	0.402	1 527,6791
EC_212270_T33Vspike_10_B	Pancreatic trypsin inhibitor OS=Bos taurus PE=1 SV=2	BPT1_BOVIN	10 903,1	1	2	3	8	0.000424	0.25	AGLCQTFVYGGCR	K	A	0.997	4.26	0.468	1 488,6724
EC_212270_T33Vspike_10_B	Pancreatic trypsin inhibitor OS=Bos taurus PE=1 SV=2	BPT1_BOVIN	10 903,1	1	2	3	8	0.000424	0.25	RNNFKSAEDCMR	K	T	0.82	2.62	0.292	1 527,6791
EC_212270_T33Vspike_11_A	Pancreatic trypsin inhibitor OS=Bos taurus PE=1 SV=2	BPT1_BOVIN	10 903,1	1	2	3	6	0.000277	0.25	AGLCQTFVYGGCR	K	A	0.997	4.15	0.459	1 488,6724
EC_212270_T33Vspike_11_A	Pancreatic trypsin inhibitor OS=Bos taurus PE=1 SV=2	BPT1_BOVIN	10 903,1	1	2	3	6	0.000277	0.25	RNNFKSAEDCMR	K	T	0.997	3.87	0.577	1 527,6791
EC_212270_T33Vspike_12_A	Pancreatic trypsin inhibitor OS=Bos taurus PE=1 SV=2	BPT1_BOVIN	10 903,1	0.999	4	6	15	0.00075	0.34	AGLCQTFVYGGCR	K	A	0.997	4.13	0.526	1 488,6724
EC_212270_T33Vspike_12_A	Pancreatic trypsin inhibitor OS=Bos taurus PE=1 SV=2	BPT1_BOVIN	10 903,1	0.999	4	6	15	0.00075	0.34	IIRYFYNAK	R	A	0.404	1.68	0.0926	1 187,6571
EC_212270_T33Vspike_12_A	Pancreatic trypsin inhibitor OS=Bos taurus PE=1 SV=2	BPT1_BOVIN	10 903,1	0.999	4	6	15	0.00075	0.34	NNFKSAEDCMR	R	T	0.298	2.68	0.452	1 371,5780
EC_212270_T33Vspike_12_A	Pancreatic trypsin inhibitor OS=Bos taurus PE=1 SV=2	BPT1_BOVIN	10 903,1	0.999	4	6	15	0.00075	0.34	RNNFKSAEDCMR	K	T	0.348	1.97	0.25	1 470,6576
EC_212270_T33Vspike_12_B	Pancreatic trypsin inhibitor OS=Bos taurus PE=1 SV=2	BPT1_BOVIN	10 903,1	1	4	6	16	0.000854	0.34	AGLCQTFVYGGCR	K	A	0.997	4.03	0.546	1 431,6509
EC_212270_T33Vspike_12_B	Pancreatic trypsin inhibitor OS=Bos taurus PE=1 SV=2	BPT1_BOVIN	10 903,1	1	4	6	16	0.000854	0.34	IIRYFYNAK	R	A	0.585	1.75	0.194	1 187,6571
EC_212270_T33Vspike_12_B	Pancreatic trypsin inhibitor OS=Bos taurus PE=1 SV=2	BPT1_BOVIN	10 903,1	1	4	6	16	0.000854	0.34	NNFKSAEDCMR	R	T	0.697	2.14	0.491	1 371,5780
EC_212270_T33Vspike_12_B	Pancreatic trypsin inhibitor OS=Bos taurus PE=1 SV=2	BPT1_BOVIN	10 903,1	1	4	6	16	0.000854	0.34	RNNFKSAEDCMR	K	T	0.997	3.08	0.457	1 527,6791
EC_212270_T33Vspike_1_A	Complement component 1 Q subcomponent-binding protein, mitochondrial OS=Homo sapiens GN=C1QBP PE=1 SV=1	C1QBP_HUMAN	31 362,6	1	2	2	2	8.61e-05	0.0674	MSGGWELELNGTEAK	K	L	0.997	4.6	0.513	1 621,7528
EC_212270_T33Vspike_1_A	Complement component 1 Q subcomponent-binding protein, mitochondrial OS=Homo sapiens GN=C1QBP PE=1 SV=1	C1QBP_HUMAN	31 362,6	1	2	2	2	8.61e-05	0.0674	MSGGWELELNGTEAKLVRK	K	V	0.976	2.5	0.0857	2 118,1014
EC_212270_T33Vspike_1_B	Complement component 1 Q subcomponent-binding protein, mitochondrial OS=Homo sapiens GN=C1QBP PE=1 SV=1	C1QBP_HUMAN	31 362,6	1	2	2	2	9.09e-05	0.0638	MSGGWELELNGTEAK	K	L	0.997	4.13	0.314	1 621,7528
EC_212270_T33Vspike_1_B	Complement component 1 Q subcomponent-binding protein, mitochondrial OS=Homo sapiens GN=C1QBP PE=1 SV=1	C1QBP_HUMAN	31 362,6	1	2	2	2	9.09e-05	0.0638	MSGGWELELNGTEAKLVR	K	K	0.995	3.62	0.298	1 990,0064
EC_212270_T33Vspike_2_A	Complement component 1 Q subcomponent-binding protein, mitochondrial OS=Homo sapiens GN=C1QBP PE=1 SV=1	C1QBP_HUMAN	31 362,6	1	2	3	3	0.000125	0.0638	MSGGWELELNGTEAK	K	L	0.997	5.01	0.534	1 621,7528
EC_212270_T33Vspike_2_A	Complement component 1 Q subcomponent-binding protein, mitochondrial OS=Homo sapiens GN=C1QBP PE=1 SV=1	C1QBP_HUMAN	31 362,6	1	2	3	3	0.000125	0.0638	MSGGWELELNGTEAKLVR	K	K	0.997	3.78	0.356	1 990,0064
EC_212270_T33Vspike_2_B	Complement component 1 Q subcomponent-binding protein, mitochondrial OS=Homo sapiens GN=C1QBP PE=1 SV=1	C1QBP_HUMAN	31 362,6	1	3	4	5	0.000218	0.0674	MSGGWELELNGTEAK	K	L	0.997	4.56	0.518	1 621,7528
EC_212270_T33Vspike_2_B	Complement component 1 Q subcomponent-binding protein, mitochondrial OS=Homo sapiens GN=C1QBP PE=1 SV=1	C1QBP_HUMAN	31 362,6	1	3	4	5	0.000218	0.0674	MSGGWELELNGTEAKLVR	K	K	0.997	3.63	0.283	1 990,0064
EC_212270_T33Vspike_2_B	Complement component 1 Q subcomponent-binding protein, mitochondrial OS=Homo sapiens GN=C1QBP PE=1 SV=1	C1QBP_HUMAN	31 362,6	1	3	4	5	0.000218	0.0674	MSGGWELELNGTEAKLVRK	K	V	0.921	2.62	0.108	2 118,1014
EC_212270_T33Vspike_3_A	Complement component 1 Q subcomponent-binding protein, mitochondrial OS=Homo sapiens GN=C1QBP PE=1 SV=1	C1QBP_HUMAN	31 362,6	1	3	5	5	0.000251	0.0674	MSGGWELELNGTEAK	K	L	0.997	3.52	0.444	1 621,7528
EC_212270_T33Vspike_3_A	Complement component 1 Q subcomponent-binding protein, mitochondrial OS=Homo sapiens GN=C1QBP PE=1 SV=1	C1QBP_HUMAN	31 362,6	1	3	5	5	0.000251	0.0674	MSGGWELELNGTEAKLVR	K	K	0.997	3.98	0.449	1 990,0064
EC_212270_T33Vspike_3_A	Complement component 1 Q subcomponent-binding protein, mitochondrial OS=Homo sapiens GN=C1QBP PE=1 SV=1	C1QBP_HUMAN	31 362,6	1	3	5	5	0.000251	0.0674	MSGGWELELNGTEAKLVRK	K	V	0.283	2.41	0	2 118,1014
EC_212270_T33Vspike_3_B	Complement component 1 Q subcomponent-binding protein, mitochondrial OS=Homo sapiens GN=C1QBP PE=1 SV=1	C1QBP_HUMAN	31 362,6	1	3	4	4	0.00021	0.0674	MSGGWELELNGTEAK	K	L	0.997	4.75	0.486	1 621,7528
EC_212270_T33Vspike_3_B	Complement component 1 Q subcomponent-binding protein, mitochondrial OS=Homo sapiens GN=C1QBP PE=1 SV=1	C1QBP_HUMAN	31 362,6	1	3	4	4	0.00021	0.0674	MSGGWELELNGTEAKLVR	K	K	0.997	3.84	0.346	1 990,0064
EC_212270_T33Vspike_3_B	Complement component 1 Q subcomponent-binding protein, mitochondrial OS=Homo sapiens GN=C1QBP PE=1 SV=1	C1QBP_HUMAN	31 362,6	1	3	4	4	0.00021	0.0674	MSGGWELELNGTEAKLVRK	K	V	0.661	2.73	0.0349	2 118,1014
EC_212270_T33Vspike_4_A	Complement component 1 Q subcomponent-binding protein, mitochondrial OS=Homo sapiens GN=C1QBP PE=1 SV=1	C1QBP_HUMAN	31 362,6	1	3	4	5	0.000201	0.0674	MSGGWELELNGTEAK	K	L	0.997	4.23	0.465	1 621,7528
EC_212270_T33Vspike_4_A	Complement component 1 Q subcomponent-binding protein, mitochondrial OS=Homo sapiens GN=C1QBP PE=1 SV=1	C1QBP_HUMAN	31 362,6	1	3	4	5	0.000201	0.0674	MSGGWELELNGTEAKLVR	K	K	0.997	4.85	0.458	1 990,0064
EC_212270_T33Vspike_4_A	Complement component 1 Q subcomponent-binding protein, mitochondrial OS=Homo sapiens GN=C1QBP PE=1 SV=1	C1QBP_HUMAN	31 362,6	1	3	4	5	0.000201	0.0674	MSGGWELELNGTEAKLVRK	K	V	0.984	2.68	0.236	2 118,1014
EC_212270_T33Vspike_4_B	Complement component 1 Q subcomponent-binding protein, mitochondrial OS=Homo sapiens GN=C1QBP PE=1 SV=1	C1QBP_HUMAN	31 362,6	1	2	3	3	0.000119	0.0638	MSGGWELELNGTEAK	K	L	0.997	4.81	0.516	1 621,7528
EC_212270_T33Vspike_4_B	Complement component 1 Q subcomponent-binding protein, mitochondrial OS=Homo sapiens GN=C1QBP PE=1 SV=1	C1QBP_HUMAN	31 362,6	1	2	3	3	0.000119	0.0638	MSGGWELELNGTEAKLVR	K	K	0.997	3.55	0.392	1 990,0064
EC_212270_T33Vspike_5_A	Complement component 1 Q subcomponent-binding protein, mitochondrial OS=Homo sapiens GN=C1QBP PE=1 SV=1	C1QBP_HUMAN	31 362,6	1	2	3	4	0.000169	0.0638	MSGGWELELNGTEAK	K	L	0.997	4.59	0.495	1 621,7528
EC_212270_T33Vspike_5_A	Complement component 1 Q subcomponent-binding protein, mitochondrial OS=Homo sapiens GN=C1QBP PE=1 SV=1	C1QBP_HUMAN	31 362,6	1	2	3	4	0.000169	0.0638	MSGGWELELNGTEAKLVR	K	K	0.997	3.88	0.424	1 990,0064
EC_212270_T33Vspike_5_B	Complement component 1 Q subcomponent-binding protein, mitochondrial OS=Homo sapiens GN=C1QBP PE=1 SV=1	C1QBP_HUMAN	31 362,6	1	2	3	5	0.000255	0.0638	MSGGWELELNGTEAK	K	L	0.997	4.02	0.368	1 621,7528
EC_212270_T33Vspike_5_B	Complement component 1 Q subcomponent-binding protein, mitochondrial OS=Homo sapiens GN=C1QBP PE=1 SV=1	C1QBP_HUMAN	31 362,6	1	2	3	5	0.000255	0.0638	MSGGWELELNGTEAKLVR	K	K	0.997	4.57	0.421	1 990,0064
EC_212270_T33Vspike_6_A	Complement component 1 Q subcomponent-binding protein, mitochondrial OS=Homo sapiens GN=C1QBP PE=1 SV=1	C1QBP_HUMAN	31 362,6	1	2	4	4	0.000221	0.0638	MSGGWELELNGTEAK	K	L	0.997	3.83	0.455	1 621,7528
EC_212270_T33Vspike_6_A	Complement component 1 Q subcomponent-binding protein, mitochondrial OS=Homo sapiens GN=C1QBP PE=1 SV=1	C1QBP_HUMAN	31 362,6	1	2	4	4	0.000221	0.0638	MSGGWELELNGTEAKLVR	K	K	0.997	4.03	0.453	1 990,0064
EC_212270_T33Vspike_6_B	Complement component 1 Q subcomponent-binding protein, mitochondrial OS=Homo sapiens GN=C1QBP PE=1 SV=1	C1QBP_HUMAN	31 362,6	1	2	2	3	0.00018	0.0638	MSGGWELELNGTEAK	K	L	0.997	3.11	0.487	1 621,7528
EC_212270_T33Vspike_6_B	Complement component 1 Q subcomponent-binding protein, mitochondrial OS=Homo sapiens GN=C1QBP PE=1 SV=1	C1QBP_HUMAN	31 362,6	1	2	2	3	0.00018	0.0638	MSGGWELELNGTEAKLVR	K	K	0.909	4.06	0.416	1 990,0064
EC_212270_T33Vspike_7_A	Complement component 1 Q subcomponent-binding protein, mitochondrial OS=Homo sapiens GN=C1QBP PE=1 SV=1	C1QBP_HUMAN	31 362,6	1	4	5	5	0.000226	0.0816	MSGGWELELNGTEAK	K	L	0.997	4.42	0.546	1 621,7528
EC_212270_T33Vspike_7_A	Complement component 1 Q subcomponent-binding protein, mitochondrial OS=Homo sapiens GN=C1QBP PE=1 SV=1	C1QBP_HUMAN	31 362,6	1	4	5	5	0.000226	0.0816	MSGGWELELNGTEAKLVR	K	K	0.966	3.46	0.372	1 990,0064
EC_212270_T33Vspike_7_A	Complement component 1 Q subcomponent-binding protein, mitochondrial OS=Homo sapiens GN=C1QBP PE=1 SV=1	C1QBP_HUMAN	31 362,6	1	4	5	5	0.000226	0.0816	MSGGWELELNGTEAKLVRK	K	V	0.997	3.09	0.175	2 118,1014
EC_212270_T33Vspike_7_A	Complement component 1 Q subcomponent-binding protein, mitochondrial OS=Homo sapiens GN=C1QBP PE=1 SV=1	C1QBP_HUMAN	31 362,6	1	4	5	5	0.000226	0.0816	TLPKMSGGWELELNGTEAKLVR	K	K	0.719	2.6	0.0467	2 429,2860
EC_212270_T33Vspike_7_B	Complement component 1 Q subcomponent-binding protein, mitochondrial OS=Homo sapiens GN=C1QBP PE=1 SV=1	C1QBP_HUMAN	31 362,6	1	3	4	4	0.000182	0.078	MSGGWELELNGTEAK	K	L	0.997	3.79	0.467	1 621,7528
EC_212270_T33Vspike_7_B	Complement component 1 Q subcomponent-binding protein, mitochondrial OS=Homo sapiens GN=C1QBP PE=1 SV=1	C1QBP_HUMAN	31 362,6	1	3	4	4	0.000182	0.078	MSGGWELELNGTEAKLVR	K	K	0.997	3.9	0.375	1 990,0064
EC_212270_T33Vspike_7_B	Complement component 1 Q subcomponent-binding protein, mitochondrial OS=Homo sapiens GN=C1QBP PE=1 SV=1	C1QBP_HUMAN	31 362,6	1	3	4	4	0.000182	0.078	TLPKMSGGWELELNGTEAKLVR	K	K	0.945	3.28	0.226	2 429,2860
EC_212270_T33Vspike_8_A	Complement component 1 Q subcomponent-binding protein, mitochondrial OS=Homo sapiens GN=C1QBP PE=1 SV=1	C1QBP_HUMAN	31 362,6	1	3	4	5	0.000235	0.0674	MSGGWELELNGTEAK	K	L	0.997	3.92	0.517	1 621,7528
EC_212270_T33Vspike_8_A	Complement component 1 Q subcomponent-binding protein, mitochondrial OS=Homo sapiens GN=C1QBP PE=1 SV=1	C1QBP_HUMAN	31 362,6	1	3	4	5	0.000235	0.0674	MSGGWELELNGTEAKLVR	K	K	0.997	3.58	0.349	1 990,0064
EC_212270_T33Vspike_8_A	Complement component 1 Q subcomponent-binding protein, mitochondrial OS=Homo sapiens GN=C1QBP PE=1 SV=1	C1QBP_HUMAN	31 362,6	1	3	4	5	0.000235	0.0674	MSGGWELELNGTEAKLVRK	K	V	0.953	3.16	0.185	2 118,1014
EC_212270_T33Vspike_8_B	Complement component 1 Q subcomponent-binding protein, mitochondrial OS=Homo sapiens GN=C1QBP PE=1 SV=1	C1QBP_HUMAN	31 362,6	1	2	2	2	9.59e-05	0.0638	MSGGWELELNGTEAK	K	L	0.997	4.61	0.559	1 621,7528
EC_212270_T33Vspike_8_B	Complement component 1 Q subcomponent-binding protein, mitochondrial OS=Homo sapiens GN=C1QBP PE=1 SV=1	C1QBP_HUMAN	31 362,6	1	2	2	2	9.59e-05	0.0638	MSGGWELELNGTEAKLVR	K	K	0.997	3.44	0.355	1 990,0064
EC_212270_T33Vspike_9_A	Complement component 1 Q subcomponent-binding protein, mitochondrial OS=Homo sapiens GN=C1QBP PE=1 SV=1	C1QBP_HUMAN	31 362,6	1	2	3	3	0.000145	0.0638	MSGGWELELNGTEAK	K	L	0.997	4.83	0.527	1 621,7528
EC_212270_T33Vspike_9_A	Complement component 1 Q subcomponent-binding protein, mitochondrial OS=Homo sapiens GN=C1QBP PE=1 SV=1	C1QBP_HUMAN	31 362,6	1	2	3	3	0.000145	0.0638	MSGGWELELNGTEAKLVR	K	K	0.997	3.48	0.323	1 990,0064
EC_212270_T33Vspike_9_B	Complement component 1 Q subcomponent-binding protein, mitochondrial OS=Homo sapiens GN=C1QBP PE=1 SV=1	C1QBP_HUMAN	31 362,6	1	2	2	2	0.000103	0.0638	MSGGWELELNGTEAK	K	L	0.997	3.88	0.536	1 621,7528
EC_212270_T33Vspike_9_B	Complement component 1 Q subcomponent-binding protein, mitochondrial OS=Homo sapiens GN=C1QBP PE=1 SV=1	C1QBP_HUMAN	31 362,6	1	2	2	2	0.000103	0.0638	MSGGWELELNGTEAKLVR	K	K	0.997	3.32	0.402	1 990,0064
EC_212270_T33Vspike_10_A	Complement component 1 Q subcomponent-binding protein, mitochondrial OS=Homo sapiens GN=C1QBP PE=1 SV=1	C1QBP_HUMAN	31 362,6	1	2	2	3	0.000163	0.0638	MSGGWELELNGTEAK	K	L	0.997	4.27	0.524	1 621,7528
EC_212270_T33Vspike_10_A	Complement component 1 Q subcomponent-binding protein, mitochondrial OS=Homo sapiens GN=C1QBP PE=1 SV=1	C1QBP_HUMAN	31 362,6	1	2	2	3	0.000163	0.0638	MSGGWELELNGTEAKLVR	K	K	0.997	4.09	0.42	1 990,0064
EC_212270_T33Vspike_10_B	Complement component 1 Q subcomponent-binding protein, mitochondrial OS=Homo sapiens GN=C1QBP PE=1 SV=1	C1QBP_HUMAN	31 362,6	1	2	2	2	0.000106	0.0638	MSGGWELELNGTEAK	K	L	0.997	3.65	0.482	1 621,7528
EC_212270_T33Vspike_10_B	Complement component 1 Q subcomponent-binding protein, mitochondrial OS=Homo sapiens GN=C1QBP PE=1 SV=1	C1QBP_HUMAN	31 362,6	1	2	2	2	0.000106	0.0638	MSGGWELELNGTEAKLVR	K	K	0.89	2.6	0.335	1 990,0064
EC_212270_T33Vspike_11_A	Complement component 1 Q subcomponent-binding protein, mitochondrial OS=Homo sapiens GN=C1QBP PE=1 SV=1	C1QBP_HUMAN	31 362,6	1	2	2	2	9.24e-05	0.0638	MSGGWELELNGTEAK	K	L	0.997	4.71	0.602	1 621,7528
EC_212270_T33Vspike_11_A	Complement component 1 Q subcomponent-binding protein, mitochondrial OS=Homo sapiens GN=C1QBP PE=1 SV=1	C1QBP_HUMAN	31 362,6	1	2	2	2	9.24e-05	0.0638	MSGGWELELNGTEAKLVR	K	K	0.997	4.4	0.38	1 990,0064
EC_212270_T33Vspike_11_B	Complement component 1 Q subcomponent-binding protein, mitochondrial OS=Homo sapiens GN=C1QBP PE=1 SV=1	C1QBP_HUMAN	31 362,6	1	2	2	2	9.31e-05	0.0638	MSGGWELELNGTEAK	K	L	0.997	4.42	0.468	1 621,7528
EC_212270_T33Vspike_11_B	Complement component 1 Q subcomponent-binding protein, mitochondrial OS=Homo sapiens GN=C1QBP PE=1 SV=1	C1QBP_HUMAN	31 362,6	1	2	2	2	9.31e-05	0.0638	MSGGWELELNGTEAKLVR	K	K	0.997	4.21	0.354	1 990,0064
EC_212270_T33Vspike_12_A	Complement component 1 Q subcomponent-binding protein, mitochondrial OS=Homo sapiens GN=C1QBP PE=1 SV=1	C1QBP_HUMAN	31 362,6	1	4	6	6	0.0003	0.0816	MSGGWELELNGTEAK	K	L	0.997	4.21	0.477	1 621,7528
EC_212270_T33Vspike_12_A	Complement component 1 Q subcomponent-binding protein, mitochondrial OS=Homo sapiens GN=C1QBP PE=1 SV=1	C1QBP_HUMAN	31 362,6	1	4	6	6	0.0003	0.0816	MSGGWELELNGTEAKLVR	K	K	0.997	4.49	0.436	1 990,0064
EC_212270_T33Vspike_12_A	Complement component 1 Q subcomponent-binding protein, mitochondrial OS=Homo sapiens GN=C1QBP PE=1 SV=1	C1QBP_HUMAN	31 362,6	1	4	6	6	0.0003	0.0816	MSGGWELELNGTEAKLVRK	K	V	0.997	2.72	0.0615	2 118,1014
EC_212270_T33Vspike_12_A	Complement component 1 Q subcomponent-binding protein, mitochondrial OS=Homo sapiens GN=C1QBP PE=1 SV=1	C1QBP_HUMAN	31 362,6	1	4	6	6	0.0003	0.0816	TLPKMSGGWELELNGTEAKLVR	K	K	0.616	2.58	0.0979	2 429,2860
EC_212270_T33Vspike_12_B	Complement component 1 Q subcomponent-binding protein, mitochondrial OS=Homo sapiens GN=C1QBP PE=1 SV=1	C1QBP_HUMAN	31 362,6	1	3	4	4	0.000214	0.078	MSGGWELELNGTEAK	K	L	0.891	2.49	0.361	1 621,7528
EC_212270_T33Vspike_12_B	Complement component 1 Q subcomponent-binding protein, mitochondrial OS=Homo sapiens GN=C1QBP PE=1 SV=1	C1QBP_HUMAN	31 362,6	1	3	4	4	0.000214	0.078	MSGGWELELNGTEAKLVR	K	K	0.997	3.12	0.325	1 990,0064
EC_212270_T33Vspike_12_B	Complement component 1 Q subcomponent-binding protein, mitochondrial OS=Homo sapiens GN=C1QBP PE=1 SV=1	C1QBP_HUMAN	31 362,6	1	3	4	4	0.000214	0.078	TLPKMSGGWELELNGTEAKLVR	K	K	0.997	3.46	0.256	2 429,2860
EC_212270_T33Vspike_5_A	Caldesmon OS=Homo sapiens GN=CALD1 PE=1 SV=3	CALD1_HUMAN	93 231,7	0.995	2	2	2	8.45e-05	0.0441	IDSRLEQYTSAIEGTK	K	S	0.945	3.02	0.296	1 810,9183
EC_212270_T33Vspike_5_A	Caldesmon OS=Homo sapiens GN=CALD1 PE=1 SV=3	CALD1_HUMAN	93 231,7	0.995	2	2	2	8.45e-05	0.0441	QKEFDPTITDASLSLPSRR	R	M	0.904	2.42	0.313	2 161,1250
EC_212270_T33Vspike_3_A	Calmodulin OS=Oreochromis mossambicus GN=calm PE=2 SV=3	CALM_OREMO	16 846,0	0.998	2	3	6	0.000302	0.389	VFDKDGNGYISAAELR	R	Y	0.997	3.3	0.505	1 754,8709
EC_212270_T33Vspike_3_A	Calmodulin OS=Oreochromis mossambicus GN=calm PE=2 SV=3	CALM_OREMO	16 846,0	0.998	2	3	6	0.000302	0.389	YVMTNLGEKLTDEXVDEMIREADIDGDGQVNYEEFVQMMTAK	R	-	0.149	2.95	0	4 983,2252
EC_212270_T33Vspike_3_B	Calmodulin OS=Oreochromis mossambicus GN=calm PE=2 SV=3	CALM_OREMO	16 846,0	0.998	2	2	3	0.000157	0.389	VFDKDGNGYISAAELR	R	Y	0.997	3.21	0.37	1 754,8709
EC_212270_T33Vspike_3_B	Calmodulin OS=Oreochromis mossambicus GN=calm PE=2 SV=3	CALM_OREMO	16 846,0	0.998	2	2	3	0.000157	0.389	YVMTNLGEKLTDEXVDEMIREADIDGDGQVNYEEFVQMMTAK	R	-	0.186	1.99	0.149	4 983,2252
EC_212270_T33Vspike_3_A	Caprin-1 OS=Bos taurus GN=CAPRIN1 PE=2 SV=1	CAPR1_BOVIN,CAPR1_HUMAN,CAPR1_MOUSE,CAPR1_RAT	78 326,4	0.994	2	2	2	0.000101	0.0198	SFMALSQDIQK	R	T	0.92	2.78	0.263	1 267,6352
EC_212270_T33Vspike_3_A	Caprin-1 OS=Bos taurus GN=CAPRIN1 PE=2 SV=1	CAPR1_BOVIN,CAPR1_HUMAN,CAPR1_MOUSE,CAPR1_RAT	78 326,4	0.994	2	2	2	0.000101	0.0198	SFMALSQDIQKTIK	R	K	0.925	2.64	0.333	1 609,8620
EC_212270_T33Vspike_3_B	Caprin-1 OS=Bos taurus GN=CAPRIN1 PE=2 SV=1	CAPR1_BOVIN,CAPR1_HUMAN,CAPR1_MOUSE,CAPR1_RAT	78 326,4	1	3	3	3	0.000157	0.0579	LNQDQLDAVSKYQEVTNNLEFAKELQR	R	S	0.864	2.88	0.0619	3 193,6126
EC_212270_T33Vspike_3_B	Caprin-1 OS=Bos taurus GN=CAPRIN1 PE=2 SV=1	CAPR1_BOVIN,CAPR1_HUMAN,CAPR1_MOUSE,CAPR1_RAT	78 326,4	1	3	3	3	0.000157	0.0579	SFMALSQDIQK	R	T	0.997	3.31	0.375	1 267,6352
EC_212270_T33Vspike_3_B	Caprin-1 OS=Bos taurus GN=CAPRIN1 PE=2 SV=1	CAPR1_BOVIN,CAPR1_HUMAN,CAPR1_MOUSE,CAPR1_RAT	78 326,4	1	3	3	3	0.000157	0.0579	SFMALSQDIQKTIK	R	K	0.14	2.2	0.126	1 609,8620
EC_212270_T33Vspike_4_A	Caprin-1 OS=Bos taurus GN=CAPRIN1 PE=2 SV=1	CAPR1_BOVIN,CAPR1_HUMAN,CAPR1_MOUSE,CAPR1_RAT	78 326,4	0.996	2	2	2	8.05e-05	0.0537	LNQDQLDAVSKYQEVTNNLEFAKELQR	R	S	0.917	3.11	0.191	3 193,6126
EC_212270_T33Vspike_4_A	Caprin-1 OS=Bos taurus GN=CAPRIN1 PE=2 SV=1	CAPR1_BOVIN,CAPR1_HUMAN,CAPR1_MOUSE,CAPR1_RAT	78 326,4	0.996	2	2	2	8.05e-05	0.0537	SFMALSQDIQK	R	T	0.95	2.67	0.315	1 267,6352
EC_212270_T33Vspike_5_A	Caprin-1 OS=Bos taurus GN=CAPRIN1 PE=2 SV=1	CAPR1_BOVIN,CAPR1_HUMAN,CAPR1_MOUSE,CAPR1_RAT	78 326,4	1	3	3	3	0.000127	0.0579	LNQDQLDAVSKYQEVTNNLEFAKELQR	R	S	0.893	2.89	0.156	3 193,6126
EC_212270_T33Vspike_5_A	Caprin-1 OS=Bos taurus GN=CAPRIN1 PE=2 SV=1	CAPR1_BOVIN,CAPR1_HUMAN,CAPR1_MOUSE,CAPR1_RAT	78 326,4	1	3	3	3	0.000127	0.0579	SFMALSQDIQK	R	T	0.997	3.26	0.322	1 267,6352
EC_212270_T33Vspike_5_A	Caprin-1 OS=Bos taurus GN=CAPRIN1 PE=2 SV=1	CAPR1_BOVIN,CAPR1_HUMAN,CAPR1_MOUSE,CAPR1_RAT	78 326,4	1	3	3	3	0.000127	0.0579	SFMALSQDIQKTIK	R	K	0.97	2.75	0.412	1 609,8620
EC_212270_T33Vspike_6_B	Caprin-1 OS=Bos taurus GN=CAPRIN1 PE=2 SV=1	CAPR1_BOVIN,CAPR1_HUMAN,CAPR1_MOUSE,CAPR1_RAT	78 326,4	0.998	2	2	2	0.00012	0.0537	LNQDQLDAVSKYQEVTNNLEFAKELQR	R	S	0.942	3.1	0.134	3 193,6126
EC_212270_T33Vspike_6_B	Caprin-1 OS=Bos taurus GN=CAPRIN1 PE=2 SV=1	CAPR1_BOVIN,CAPR1_HUMAN,CAPR1_MOUSE,CAPR1_RAT	78 326,4	0.998	2	2	2	0.00012	0.0537	SFMALSQDIQK	R	T	0.972	2.77	0.315	1 267,6352
EC_212270_T33Vspike_7_A	Caprin-1 OS=Bos taurus GN=CAPRIN1 PE=2 SV=1	CAPR1_BOVIN,CAPR1_HUMAN,CAPR1_MOUSE,CAPR1_RAT	78 326,4	1	2	2	2	9.04e-05	0.0579	LNQDQLDAVSKYQEVTNNLEFAKELQR	R	S	0.992	3.62	0.319	3 193,6126
EC_212270_T33Vspike_7_A	Caprin-1 OS=Bos taurus GN=CAPRIN1 PE=2 SV=1	CAPR1_BOVIN,CAPR1_HUMAN,CAPR1_MOUSE,CAPR1_RAT	78 326,4	1	2	2	2	9.04e-05	0.0579	SFMALSQDIQKTIK	R	K	0.959	3.11	0.38	1 609,8620
EC_212270_T33Vspike_7_B	Caprin-1 OS=Bos taurus GN=CAPRIN1 PE=2 SV=1	CAPR1_BOVIN,CAPR1_HUMAN,CAPR1_MOUSE,CAPR1_RAT	78 326,4	1	3	3	3	0.000136	0.0579	LNQDQLDAVSKYQEVTNNLEFAKELQR	R	S	0.979	3.44	0.299	3 193,6126
EC_212270_T33Vspike_7_B	Caprin-1 OS=Bos taurus GN=CAPRIN1 PE=2 SV=1	CAPR1_BOVIN,CAPR1_HUMAN,CAPR1_MOUSE,CAPR1_RAT	78 326,4	1	3	3	3	0.000136	0.0579	SFMALSQDIQK	R	T	0.997	2.99	0.301	1 267,6352
EC_212270_T33Vspike_7_B	Caprin-1 OS=Bos taurus GN=CAPRIN1 PE=2 SV=1	CAPR1_BOVIN,CAPR1_HUMAN,CAPR1_MOUSE,CAPR1_RAT	78 326,4	1	3	3	3	0.000136	0.0579	SFMALSQDIQKTIK	R	K	0.991	3.17	0.44	1 609,8620
EC_212270_T33Vspike_2_A	Caprin-1 OS=Homo sapiens GN=CAPRIN1 PE=1 SV=2	CAPR1_HUMAN	78 364,4	0.999	2	2	2	8.35e-05	0.0536	LNQDQLDAVSKYQEVTNNLEFAKELQR	R	S	0.904	3.38	0.165	3 193,6126
EC_212270_T33Vspike_2_A	Caprin-1 OS=Homo sapiens GN=CAPRIN1 PE=1 SV=2	CAPR1_HUMAN	78 364,4	0.999	2	2	2	8.35e-05	0.0536	SFMALSQDIQK	R	T	0.989	3	0.351	1 267,6352
EC_212270_T33Vspike_2_B	Caprin-1 OS=Homo sapiens GN=CAPRIN1 PE=1 SV=2	CAPR1_HUMAN	78 364,4	1	3	3	3	0.000131	0.126	LNQDQLDAVSKYQEVTNNLEFAKELQR	R	S	0.997	3.76	0.446	3 193,6126
EC_212270_T33Vspike_2_B	Caprin-1 OS=Homo sapiens GN=CAPRIN1 PE=1 SV=2	CAPR1_HUMAN	78 364,4	1	3	3	3	0.000131	0.126	SFMALSQDIQK	R	T	0.984	2.91	0.268	1 267,6352
EC_212270_T33Vspike_2_B	Caprin-1 OS=Homo sapiens GN=CAPRIN1 PE=1 SV=2	CAPR1_HUMAN	78 364,4	1	3	3	3	0.000131	0.126	SSGPPPPSGSSGSEAAAGAGAAAPASQHPATGTGAVQTEAMKQILGVIDKK	K	L	0.874	2.59	0.0656	4 698,3433
EC_212270_T33Vspike_3_B	Capsid protein VP1 OS=Adeno-associated virus 2 (isolate Srivastava/1982) GN=VP1 PE=1 SV=2	CAPSD_AAV2S	81 945,5	0.997	2	2	2	0.000105	0.0653	GLVLPGYKYLGPFNGLDKGEPVNEADAAALEHDK	R	A	0.997	2.73	0.012	3 597,8229
EC_212270_T33Vspike_3_B	Capsid protein VP1 OS=Adeno-associated virus 2 (isolate Srivastava/1982) GN=VP1 PE=1 SV=2	CAPSD_AAV2S	81 945,5	0.997	2	2	2	0.000105	0.0653	RWNPEIQYTSNYNK	K	S	0.07	0.932	0.0963	1 812,8663
EC_212270_T33Vspike_1_B	Chromobox protein homolog 3 OS=Homo sapiens GN=CBX3 PE=1 SV=4	CBX3_HUMAN,CBX3_MOUSE	20 812,0	1	2	2	2	9.09e-05	0.186	GLDPERIIGATDSSGELMFLMK	R	W	0.997	4.31	0.438	2 380,1891
EC_212270_T33Vspike_1_B	Chromobox protein homolog 3 OS=Homo sapiens GN=CBX3 PE=1 SV=4	CBX3_HUMAN,CBX3_MOUSE	20 812,0	1	2	2	2	9.09e-05	0.186	LTWHSCPEDEAQ	R	-	0.93	1.72	0.268	1 472,6112
EC_212270_T33Vspike_2_A	Chromobox protein homolog 3 OS=Homo sapiens GN=CBX3 PE=1 SV=4	CBX3_HUMAN,CBX3_MOUSE	20 812,0	0.999	2	2	2	8.35e-05	0.153	IIGATDSSGELMFLMK	R	W	0.997	4.13	0.62	1 712,8600
EC_212270_T33Vspike_2_A	Chromobox protein homolog 3 OS=Homo sapiens GN=CBX3 PE=1 SV=4	CBX3_HUMAN,CBX3_MOUSE	20 812,0	0.999	2	2	2	8.35e-05	0.153	LTWHSCPEDEAQ	R	-	0.778	2.02	0.288	1 415,5897
EC_212270_T33Vspike_1_A	Coiled-coil domain-containing protein 124 OS=Homo sapiens GN=CCDC124 PE=1 SV=1	CC124_HUMAN,CC124_PONAB	25 835,7	1	2	2	2	8.61e-05	0.148	TIEDAIAVLSVAEEAADRHPERR	R	M	0.976	2.42	0.278	2 548,3115
EC_212270_T33Vspike_1_A	Coiled-coil domain-containing protein 124 OS=Homo sapiens GN=CCDC124 PE=1 SV=1	CC124_HUMAN,CC124_PONAB	25 835,7	1	2	2	2	8.61e-05	0.148	VLEEGSVEAR	R	T	0.997	2.42	0.332	1 088,5582
EC_212270_T33Vspike_2_A	Coiled-coil domain-containing protein 124 OS=Homo sapiens GN=CCDC124 PE=1 SV=1	CC124_HUMAN,CC124_PONAB	25 835,7	1	3	3	4	0.000167	0.206	AAFTAFEEAQLPR	R	L	0.997	3.06	0.44	1 450,7325
EC_212270_T33Vspike_2_A	Coiled-coil domain-containing protein 124 OS=Homo sapiens GN=CCDC124 PE=1 SV=1	CC124_HUMAN,CC124_PONAB	25 835,7	1	3	3	4	0.000167	0.206	TIEDAIAVLSVAEEAADRHPERR	R	M	0.833	2.6	0.259	2 548,3115
EC_212270_T33Vspike_2_A	Coiled-coil domain-containing protein 124 OS=Homo sapiens GN=CCDC124 PE=1 SV=1	CC124_HUMAN,CC124_PONAB	25 835,7	1	3	3	4	0.000167	0.206	VLEEGSVEAR	R	T	0.997	2.9	0.338	1 088,5582
EC_212270_T33Vspike_2_B	Coiled-coil domain-containing protein 124 OS=Homo sapiens GN=CCDC124 PE=1 SV=1	CC124_HUMAN,CC124_PONAB	25 835,7	1	2	3	3	0.000131	0.148	TIEDAIAVLSVAEEAADRHPERR	R	M	0.866	2.52	0.238	2 548,3115
EC_212270_T33Vspike_2_B	Coiled-coil domain-containing protein 124 OS=Homo sapiens GN=CCDC124 PE=1 SV=1	CC124_HUMAN,CC124_PONAB	25 835,7	1	2	3	3	0.000131	0.148	VLEEGSVEAR	R	T	0.997	2.39	0.398	1 088,5582
EC_212270_T33Vspike_3_A	Coiled-coil domain-containing protein 124 OS=Homo sapiens GN=CCDC124 PE=1 SV=1	CC124_HUMAN,CC124_PONAB	25 835,7	1	3	4	5	0.000251	0.148	TIEDAIAVLSVAEEAADRHPER	R	R	0.291	2.2	0.0589	2 392,2104
EC_212270_T33Vspike_3_A	Coiled-coil domain-containing protein 124 OS=Homo sapiens GN=CCDC124 PE=1 SV=1	CC124_HUMAN,CC124_PONAB	25 835,7	1	3	4	5	0.000251	0.148	TIEDAIAVLSVAEEAADRHPERR	R	M	0.867	2.49	0.147	2 548,3115
EC_212270_T33Vspike_3_A	Coiled-coil domain-containing protein 124 OS=Homo sapiens GN=CCDC124 PE=1 SV=1	CC124_HUMAN,CC124_PONAB	25 835,7	1	3	4	5	0.000251	0.148	VLEEGSVEAR	R	T	0.997	2.62	0.346	1 088,5582
EC_212270_T33Vspike_3_B	Coiled-coil domain-containing protein 124 OS=Homo sapiens GN=CCDC124 PE=1 SV=1	CC124_HUMAN,CC124_PONAB	25 835,7	0.999	2	3	4	0.00021	0.148	TIEDAIAVLSVAEEAADRHPERR	R	M	0.731	2.37	0.217	2 548,3115
EC_212270_T33Vspike_3_B	Coiled-coil domain-containing protein 124 OS=Homo sapiens GN=CCDC124 PE=1 SV=1	CC124_HUMAN,CC124_PONAB	25 835,7	0.999	2	3	4	0.00021	0.148	VLEEGSVEAR	R	T	0.997	2.84	0.412	1 088,5582
EC_212270_T33Vspike_6_B	Coiled-coil domain-containing protein 124 OS=Homo sapiens GN=CCDC124 PE=1 SV=1	CC124_HUMAN,CC124_PONAB	25 835,7	0.997	2	2	2	0.00012	0.148	TIEDAIAVLSVAEEAADRHPERR	R	M	0.931	2.71	0.224	2 548,3115
EC_212270_T33Vspike_6_B	Coiled-coil domain-containing protein 124 OS=Homo sapiens GN=CCDC124 PE=1 SV=1	CC124_HUMAN,CC124_PONAB	25 835,7	0.997	2	2	2	0.00012	0.148	VLEEGSVEAR	R	T	0.96	2.2	0.372	1 088,5582
EC_212270_T33Vspike_7_A	Coiled-coil domain-containing protein 124 OS=Homo sapiens GN=CCDC124 PE=1 SV=1	CC124_HUMAN,CC124_PONAB	25 835,7	0.998	2	3	4	0.000181	0.148	TIEDAIAVLSVAEEAADRHPERR	R	M	0.88	2.25	0.0597	2 548,3115
EC_212270_T33Vspike_7_A	Coiled-coil domain-containing protein 124 OS=Homo sapiens GN=CCDC124 PE=1 SV=1	CC124_HUMAN,CC124_PONAB	25 835,7	0.998	2	3	4	0.000181	0.148	VLEEGSVEAR	R	T	0.98	2.54	0.268	1 088,5582
EC_212270_T33Vspike_8_A	Coiled-coil domain-containing protein 124 OS=Homo sapiens GN=CCDC124 PE=1 SV=1	CC124_HUMAN,CC124_PONAB	25 835,7	1	2	2	2	9.39e-05	0.148	TIEDAIAVLSVAEEAADRHPERR	R	M	0.964	2.83	0.0971	2 548,3115
EC_212270_T33Vspike_8_A	Coiled-coil domain-containing protein 124 OS=Homo sapiens GN=CCDC124 PE=1 SV=1	CC124_HUMAN,CC124_PONAB	25 835,7	1	2	2	2	9.39e-05	0.148	VLEEGSVEAR	R	T	0.997	2.45	0.209	1 088,5582
EC_212270_T33Vspike_8_B	Coiled-coil domain-containing protein 124 OS=Homo sapiens GN=CCDC124 PE=1 SV=1	CC124_HUMAN,CC124_PONAB	25 835,7	0.998	2	2	2	9.59e-05	0.148	TIEDAIAVLSVAEEAADRHPERR	R	M	0.886	3	0.312	2 548,3115
EC_212270_T33Vspike_8_B	Coiled-coil domain-containing protein 124 OS=Homo sapiens GN=CCDC124 PE=1 SV=1	CC124_HUMAN,CC124_PONAB	25 835,7	0.998	2	2	2	9.59e-05	0.148	VLEEGSVEAR	R	T	0.974	2.14	0.328	1 088,5582
EC_212270_T33Vspike_9_A	Coiled-coil domain-containing protein 124 OS=Homo sapiens GN=CCDC124 PE=1 SV=1	CC124_HUMAN,CC124_PONAB	25 835,7	1	2	3	4	0.000194	0.148	TIEDAIAVLSVAEEAADRHPERR	R	M	0.977	3.18	0.313	2 548,3115
EC_212270_T33Vspike_9_A	Coiled-coil domain-containing protein 124 OS=Homo sapiens GN=CCDC124 PE=1 SV=1	CC124_HUMAN,CC124_PONAB	25 835,7	1	2	3	4	0.000194	0.148	VLEEGSVEAR	R	T	0.997	2.87	0.336	1 088,5582
EC_212270_T33Vspike_10_A	Coiled-coil domain-containing protein 124 OS=Homo sapiens GN=CCDC124 PE=1 SV=1	CC124_HUMAN,CC124_PONAB	25 835,7	0.998	3	3	3	0.000163	0.206	AAFTAFEEAQLPR	R	L	0.939	2.69	0.27	1 450,7325
EC_212270_T33Vspike_10_A	Coiled-coil domain-containing protein 124 OS=Homo sapiens GN=CCDC124 PE=1 SV=1	CC124_HUMAN,CC124_PONAB	25 835,7	0.998	3	3	3	0.000163	0.206	TIEDAIAVLSVAEEAADRHPERR	R	M	0.781	2.29	0.135	2 548,3115
EC_212270_T33Vspike_10_A	Coiled-coil domain-containing protein 124 OS=Homo sapiens GN=CCDC124 PE=1 SV=1	CC124_HUMAN,CC124_PONAB	25 835,7	0.998	3	3	3	0.000163	0.206	VLEEGSVEAR	R	T	0.879	2.23	0.285	1 088,5582
EC_212270_T33Vspike_10_B	Coiled-coil domain-containing protein 124 OS=Homo sapiens GN=CCDC124 PE=1 SV=1	CC124_HUMAN,CC124_PONAB	25 835,7	0.998	2	2	2	0.000106	0.103	AAFTAFEEAQLPR	R	L	0.945	2.77	0.262	1 450,7325
EC_212270_T33Vspike_10_B	Coiled-coil domain-containing protein 124 OS=Homo sapiens GN=CCDC124 PE=1 SV=1	CC124_HUMAN,CC124_PONAB	25 835,7	0.998	2	2	2	0.000106	0.103	VLEEGSVEAR	R	T	0.908	2.63	0.235	1 088,5582
EC_212270_T33Vspike_1_A	Coiled-coil domain-containing protein 58 OS=Bos taurus GN=CCDC58 PE=2 SV=1	CCD58_BOVIN,CCD58_HUMAN,CCD58_MOUSE	16 708,1	1	2	2	2	8.61e-05	0.347	LKWMQSELNVEEVVNDRSWK	K	V	0.858	2.61	0.0523	2 490,2446
EC_212270_T33Vspike_1_A	Coiled-coil domain-containing protein 58 OS=Bos taurus GN=CCDC58 PE=2 SV=1	CCD58_BOVIN,CCD58_HUMAN,CCD58_MOUSE	16 708,1	1	2	2	2	8.61e-05	0.347	TIDDRIVHELNTTVPTASFAGKIDASQTCK	R	Q	0.997	4.05	0.336	3 288,6533
EC_212270_T33Vspike_4_A	Coiled-coil domain-containing protein 58 OS=Bos taurus GN=CCDC58 PE=2 SV=1	CCD58_BOVIN,CCD58_HUMAN,CCD58_MOUSE	16 708,1	0.997	2	2	2	8.05e-05	0.208	TIDDRIVHELNTTVPTASFAGK	R	I	0.935	3.16	0.267	2 385,2411
EC_212270_T33Vspike_4_A	Coiled-coil domain-containing protein 58 OS=Bos taurus GN=CCDC58 PE=2 SV=1	CCD58_BOVIN,CCD58_HUMAN,CCD58_MOUSE	16 708,1	0.997	2	2	2	8.05e-05	0.208	TIDDRIVHELNTTVPTASFAGKIDASQTCK	R	Q	0.961	3.3	0.245	3 288,6533
EC_212270_T33Vspike_8_A	Coiled-coil domain-containing protein 58 OS=Homo sapiens GN=CCDC58 PE=1 SV=1	CCD58_HUMAN	16 620,0	1	2	2	3	0.000141	0.292	LKWMQSELNVEEVVNDRSWK	K	V	0.952	2.98	0.248	2 490,2446
EC_212270_T33Vspike_8_A	Coiled-coil domain-containing protein 58 OS=Homo sapiens GN=CCDC58 PE=1 SV=1	CCD58_HUMAN	16 620,0	1	2	2	3	0.000141	0.292	TIDDRIVHELNTTVPTASFAGK	R	I	0.997	3.89	0.336	2 385,2411
EC_212270_T33Vspike_8_B	Coiled-coil domain-containing protein 58 OS=Homo sapiens GN=CCDC58 PE=1 SV=1	CCD58_HUMAN	16 620,0	1	2	2	3	0.000144	0.292	LKWMQSELNVEEVVNDRSWK	K	V	0.971	3.23	0.286	2 490,2446
EC_212270_T33Vspike_8_B	Coiled-coil domain-containing protein 58 OS=Homo sapiens GN=CCDC58 PE=1 SV=1	CCD58_HUMAN	16 620,0	1	2	2	3	0.000144	0.292	TIDDRIVHELNTTVPTASFAGK	R	I	0.997	3.62	0.263	2 385,2411
EC_212270_T33Vspike_2_A	Coiled-coil domain-containing protein 58 OS=Homo sapiens GN=CCDC58 PE=1 SV=1	CCD58_HUMAN,CCD58_MOUSE	16 620,0	0.994	2	2	2	8.35e-05	0.25	TIDDRIVHELNTTVPTASFAGK	R	I	0.96	3.29	0.131	2 385,2411
EC_212270_T33Vspike_2_A	Coiled-coil domain-containing protein 58 OS=Homo sapiens GN=CCDC58 PE=1 SV=1	CCD58_HUMAN,CCD58_MOUSE	16 620,0	0.994	2	2	2	8.35e-05	0.25	VIKNCIAQTSAVVK	R	N	0.82	2.34	0.294	1 530,8673
EC_212270_T33Vspike_1_A	Coiled-coil domain-containing protein 86 OS=Homo sapiens GN=CCDC86 PE=1 SV=1	CCD86_HUMAN	40 236,1	1	5	5	5	0.000215	0.197	ALVEFESNPEETREPGSPPSVQR	R	A	0.975	2.72	0.442	2 555,2373
EC_212270_T33Vspike_1_A	Coiled-coil domain-containing protein 86 OS=Homo sapiens GN=CCDC86 PE=1 SV=1	CCD86_HUMAN	40 236,1	1	5	5	5	0.000215	0.197	DTLALLQKQPPQQPAAKI	R	-	0.997	3.54	0.307	1 960,1230
EC_212270_T33Vspike_1_A	Coiled-coil domain-containing protein 86 OS=Homo sapiens GN=CCDC86 PE=1 SV=1	CCD86_HUMAN	40 236,1	1	5	5	5	0.000215	0.197	KLNKEELPVIPK	K	G	0.942	2.62	0.343	1 407,8572
EC_212270_T33Vspike_1_A	Coiled-coil domain-containing protein 86 OS=Homo sapiens GN=CCDC86 PE=1 SV=1	CCD86_HUMAN	40 236,1	1	5	5	5	0.000215	0.197	LGGLRPESPESLTSVSR	R	T	0.997	3.8	0.391	1 784,9502
EC_212270_T33Vspike_1_A	Coiled-coil domain-containing protein 86 OS=Homo sapiens GN=CCDC86 PE=1 SV=1	CCD86_HUMAN	40 236,1	1	5	5	5	0.000215	0.197	RLGGLRPESPESLTSVSR	R	T	0.934	2.66	0.284	1 941,0513
EC_212270_T33Vspike_1_B	Coiled-coil domain-containing protein 86 OS=Homo sapiens GN=CCDC86 PE=1 SV=1	CCD86_HUMAN	40 236,1	1	2	2	3	0.000136	0.0833	DTLALLQKQPPQQPAAKI	R	-	0.997	3.08	0.368	1 960,1230
EC_212270_T33Vspike_1_B	Coiled-coil domain-containing protein 86 OS=Homo sapiens GN=CCDC86 PE=1 SV=1	CCD86_HUMAN	40 236,1	1	2	2	3	0.000136	0.0833	KLNKEELPVIPK	K	G	0.917	2.36	0.197	1 407,8572
EC_212270_T33Vspike_2_A	Coiled-coil domain-containing protein 86 OS=Homo sapiens GN=CCDC86 PE=1 SV=1	CCD86_HUMAN	40 236,1	1	4	5	7	0.000292	0.194	ALVEFESNPEETREPGSPPSVQR	R	A	0.997	3.84	0.475	2 555,2373
EC_212270_T33Vspike_2_A	Coiled-coil domain-containing protein 86 OS=Homo sapiens GN=CCDC86 PE=1 SV=1	CCD86_HUMAN	40 236,1	1	4	5	7	0.000292	0.194	DTLALLQKQPPQQPAAKI	R	-	0.997	2.83	0.291	1 960,1230
EC_212270_T33Vspike_2_A	Coiled-coil domain-containing protein 86 OS=Homo sapiens GN=CCDC86 PE=1 SV=1	CCD86_HUMAN	40 236,1	1	4	5	7	0.000292	0.194	KLNKEELPVIPK	K	G	0.967	2.55	0.221	1 407,8572
EC_212270_T33Vspike_2_A	Coiled-coil domain-containing protein 86 OS=Homo sapiens GN=CCDC86 PE=1 SV=1	CCD86_HUMAN	40 236,1	1	4	5	7	0.000292	0.194	LGGLRPESPESLTSVSR	R	T	0.997	3.6	0.38	1 784,9502
EC_212270_T33Vspike_2_B	Coiled-coil domain-containing protein 86 OS=Homo sapiens GN=CCDC86 PE=1 SV=1	CCD86_HUMAN	40 236,1	0.999	2	2	2	8.71e-05	0.0833	DTLALLQKQPPQQPAAKI	R	-	0.964	2.48	0.262	1 960,1230
EC_212270_T33Vspike_2_B	Coiled-coil domain-containing protein 86 OS=Homo sapiens GN=CCDC86 PE=1 SV=1	CCD86_HUMAN	40 236,1	0.999	2	2	2	8.71e-05	0.0833	KLNKEELPVIPK	K	G	0.951	2.82	0.177	1 407,8572
EC_212270_T33Vspike_3_A	Coiled-coil domain-containing protein 86 OS=Homo sapiens GN=CCDC86 PE=1 SV=1	CCD86_HUMAN	40 236,1	0.999	2	2	4	0.000201	0.0833	DTLALLQKQPPQQPAAKI	R	-	0.997	3.05	0.394	1 960,1230
EC_212270_T33Vspike_3_A	Coiled-coil domain-containing protein 86 OS=Homo sapiens GN=CCDC86 PE=1 SV=1	CCD86_HUMAN	40 236,1	0.999	2	2	4	0.000201	0.0833	KLNKEELPVIPK	K	G	0.761	2.32	0.181	1 407,8572
EC_212270_T33Vspike_4_A	Coiled-coil domain-containing protein 86 OS=Homo sapiens GN=CCDC86 PE=1 SV=1	CCD86_HUMAN	40 236,1	1	4	4	5	0.000201	0.192	ALVEFESNPEETREPGSPPSVQR	R	A	0.958	2.9	0.193	2 555,2373
EC_212270_T33Vspike_4_A	Coiled-coil domain-containing protein 86 OS=Homo sapiens GN=CCDC86 PE=1 SV=1	CCD86_HUMAN	40 236,1	1	4	4	5	0.000201	0.192	DTLALLQKQPPQQPAAKI	R	-	0.962	2.49	0.322	1 960,1230
EC_212270_T33Vspike_4_A	Coiled-coil domain-containing protein 86 OS=Homo sapiens GN=CCDC86 PE=1 SV=1	CCD86_HUMAN	40 236,1	1	4	4	5	0.000201	0.192	FSQMLQDKPLR	R	T	0.923	2.8	0.308	1 362,7200
EC_212270_T33Vspike_4_A	Coiled-coil domain-containing protein 86 OS=Homo sapiens GN=CCDC86 PE=1 SV=1	CCD86_HUMAN	40 236,1	1	4	4	5	0.000201	0.192	LGGLRPESPESLTSVSR	R	T	0.972	3.17	0.315	1 784,9502
EC_212270_T33Vspike_4_B	Coiled-coil domain-containing protein 86 OS=Homo sapiens GN=CCDC86 PE=1 SV=1	CCD86_HUMAN	40 236,1	1	3	3	3	0.000119	0.161	ALVEFESNPEETREPGSPPSVQR	R	A	0.954	2.52	0.288	2 555,2373
EC_212270_T33Vspike_4_B	Coiled-coil domain-containing protein 86 OS=Homo sapiens GN=CCDC86 PE=1 SV=1	CCD86_HUMAN	40 236,1	1	3	3	3	0.000119	0.161	DTLALLQKQPPQQPAAKI	R	-	0.97	2.89	0.209	1 960,1230
EC_212270_T33Vspike_4_B	Coiled-coil domain-containing protein 86 OS=Homo sapiens GN=CCDC86 PE=1 SV=1	CCD86_HUMAN	40 236,1	1	3	3	3	0.000119	0.161	LGGLRPESPESLTSVSR	R	T	0.982	3.32	0.263	1 784,9502
EC_212270_T33Vspike_5_A	Coiled-coil domain-containing protein 86 OS=Homo sapiens GN=CCDC86 PE=1 SV=1	CCD86_HUMAN	40 236,1	1	3	3	3	0.000127	0.114	DTLALLQKQPPQQPAAKI	R	-	0.997	3.32	0.361	1 960,1230
EC_212270_T33Vspike_5_A	Coiled-coil domain-containing protein 86 OS=Homo sapiens GN=CCDC86 PE=1 SV=1	CCD86_HUMAN	40 236,1	1	3	3	3	0.000127	0.114	FSQMLQDKPLR	R	T	0.888	2.57	0.367	1 362,7200
EC_212270_T33Vspike_5_A	Coiled-coil domain-containing protein 86 OS=Homo sapiens GN=CCDC86 PE=1 SV=1	CCD86_HUMAN	40 236,1	1	3	3	3	0.000127	0.114	KLNKEELPVIPK	K	G	0.977	2.57	0.249	1 407,8572
EC_212270_T33Vspike_5_B	Coiled-coil domain-containing protein 86 OS=Homo sapiens GN=CCDC86 PE=1 SV=1	CCD86_HUMAN	40 236,1	1	3	3	4	0.000204	0.161	ALVEFESNPEETREPGSPPSVQR	R	A	0.997	3.83	0.368	2 555,2373
EC_212270_T33Vspike_5_B	Coiled-coil domain-containing protein 86 OS=Homo sapiens GN=CCDC86 PE=1 SV=1	CCD86_HUMAN	40 236,1	1	3	3	4	0.000204	0.161	DTLALLQKQPPQQPAAKI	R	-	0.997	3.17	0.289	1 960,1230
EC_212270_T33Vspike_5_B	Coiled-coil domain-containing protein 86 OS=Homo sapiens GN=CCDC86 PE=1 SV=1	CCD86_HUMAN	40 236,1	1	3	3	4	0.000204	0.161	LGGLRPESPESLTSVSR	R	T	0.982	3.06	0.353	1 784,9502
EC_212270_T33Vspike_7_A	Coiled-coil domain-containing protein 86 OS=Homo sapiens GN=CCDC86 PE=1 SV=1	CCD86_HUMAN	40 236,1	1	4	4	5	0.000226	0.164	ALVEFESNPEETREPGSPPSVQR	R	A	0.895	2.24	0.297	2 555,2373
EC_212270_T33Vspike_7_A	Coiled-coil domain-containing protein 86 OS=Homo sapiens GN=CCDC86 PE=1 SV=1	CCD86_HUMAN	40 236,1	1	4	4	5	0.000226	0.164	DTLALLQKQPPQQPAAKI	R	-	0.997	3.04	0.327	1 960,1230
EC_212270_T33Vspike_7_A	Coiled-coil domain-containing protein 86 OS=Homo sapiens GN=CCDC86 PE=1 SV=1	CCD86_HUMAN	40 236,1	1	4	4	5	0.000226	0.164	LGGLRPESPESLTSVSR	R	T	0.997	3.59	0.405	1 784,9502
EC_212270_T33Vspike_7_A	Coiled-coil domain-containing protein 86 OS=Homo sapiens GN=CCDC86 PE=1 SV=1	CCD86_HUMAN	40 236,1	1	4	4	5	0.000226	0.164	RLGGLRPESPESLTSVSR	R	T	0.796	2.71	0.277	1 941,0513
EC_212270_T33Vspike_7_B	Coiled-coil domain-containing protein 86 OS=Homo sapiens GN=CCDC86 PE=1 SV=1	CCD86_HUMAN	40 236,1	0.999	2	2	3	0.000136	0.0833	DTLALLQKQPPQQPAAKI	R	-	0.967	2.76	0.148	1 960,1230
EC_212270_T33Vspike_7_B	Coiled-coil domain-containing protein 86 OS=Homo sapiens GN=CCDC86 PE=1 SV=1	CCD86_HUMAN	40 236,1	0.999	2	2	3	0.000136	0.0833	KLNKEELPVIPK	K	G	0.97	2.55	0.285	1 407,8572
EC_212270_T33Vspike_8_A	Coiled-coil domain-containing protein 86 OS=Homo sapiens GN=CCDC86 PE=1 SV=1	CCD86_HUMAN	40 236,1	0.997	2	2	2	9.39e-05	0.0833	DTLALLQKQPPQQPAAKI	R	-	0.958	2.93	0.199	1 960,1230
EC_212270_T33Vspike_8_A	Coiled-coil domain-containing protein 86 OS=Homo sapiens GN=CCDC86 PE=1 SV=1	CCD86_HUMAN	40 236,1	0.997	2	2	2	9.39e-05	0.0833	KLNKEELPVIPK	K	G	0.874	2.69	0.153	1 407,8572
EC_212270_T33Vspike_9_A	Coiled-coil domain-containing protein 86 OS=Homo sapiens GN=CCDC86 PE=1 SV=1	CCD86_HUMAN	40 236,1	1	3	3	3	0.000145	0.147	ALVEFESNPEETREPGSPPSVQR	R	A	0.947	2.8	0.33	2 555,2373
EC_212270_T33Vspike_9_A	Coiled-coil domain-containing protein 86 OS=Homo sapiens GN=CCDC86 PE=1 SV=1	CCD86_HUMAN	40 236,1	1	3	3	3	0.000145	0.147	DTLALLQKQPPQQPAAKI	R	-	0.997	2.92	0.388	1 960,1230
EC_212270_T33Vspike_9_A	Coiled-coil domain-containing protein 86 OS=Homo sapiens GN=CCDC86 PE=1 SV=1	CCD86_HUMAN	40 236,1	1	3	3	3	0.000145	0.147	KLNKEELPVIPK	K	G	0.921	2.27	0.185	1 407,8572
EC_212270_T33Vspike_9_B	Coiled-coil domain-containing protein 86 OS=Homo sapiens GN=CCDC86 PE=1 SV=1	CCD86_HUMAN	40 236,1	1	2	2	2	0.000103	0.0833	DTLALLQKQPPQQPAAKI	R	-	0.997	2.69	0.272	1 960,1230
EC_212270_T33Vspike_9_B	Coiled-coil domain-containing protein 86 OS=Homo sapiens GN=CCDC86 PE=1 SV=1	CCD86_HUMAN	40 236,1	1	2	2	2	0.000103	0.0833	KLNKEELPVIPK	K	G	0.996	2.84	0.318	1 407,8572
EC_212270_T33Vspike_1_B	Cyclin-dependent kinase inhibitor 2A, isoforms 1/2/3 OS=Homo sapiens GN=CDKN2A PE=1 SV=2	CD2A1_HUMAN	16 532,8	0.999	2	2	2	9.09e-05	0.244	ALLEAGALPNAPNSYGR	R	R	0.962	2.77	0.407	1 713,8919
EC_212270_T33Vspike_1_B	Cyclin-dependent kinase inhibitor 2A, isoforms 1/2/3 OS=Homo sapiens GN=CDKN2A PE=1 SV=2	CD2A1_HUMAN	16 532,8	0.999	2	2	2	9.09e-05	0.244	DAWGRLPVDLAEELGHRDVAR	R	Y	0.979	3.24	0.378	2 375,2217
EC_212270_T33Vspike_7_B	CD2-associated protein OS=Homo sapiens GN=CD2AP PE=1 SV=1	CD2AP_HUMAN	71 454,0	0.996	2	2	3	0.000136	0.0438	ERHGNVASLVQR	R	I	0.967	2.59	0.142	1 365,7345
EC_212270_T33Vspike_7_B	CD2-associated protein OS=Homo sapiens GN=CD2AP PE=1 SV=1	CD2AP_HUMAN	71 454,0	0.996	2	2	3	0.000136	0.0438	GIGFGDIFKEGSVKLR	R	T	0.761	2.67	0.209	1 722,9540
EC_212270_T33Vspike_1_A	CD2 antigen cytoplasmic tail-binding protein 2 OS=Homo sapiens GN=CD2BP2 PE=1 SV=1	CD2B2_HUMAN	37 647,2	0.999	2	2	3	0.000129	0.0733	LSGLADQMVAR	R	G	0.879	2.46	0.227	1 160,6093
EC_212270_T33Vspike_1_A	CD2 antigen cytoplasmic tail-binding protein 2 OS=Homo sapiens GN=CD2BP2 PE=1 SV=1	CD2B2_HUMAN	37 647,2	0.999	2	2	3	0.000129	0.0733	LVDPVAGSGGPGSR	K	F	0.993	2.86	0.362	1 268,6595
EC_212270_T33Vspike_1_B	CD2 antigen cytoplasmic tail-binding protein 2 OS=Homo sapiens GN=CD2BP2 PE=1 SV=1	CD2B2_HUMAN	37 647,2	0.999	2	2	3	0.000136	0.0733	LSGLADQMVAR	R	G	0.936	2.93	0.228	1 160,6093
EC_212270_T33Vspike_1_B	CD2 antigen cytoplasmic tail-binding protein 2 OS=Homo sapiens GN=CD2BP2 PE=1 SV=1	CD2B2_HUMAN	37 647,2	0.999	2	2	3	0.000136	0.0733	LVDPVAGSGGPGSR	K	F	0.992	2.91	0.463	1 268,6595
EC_212270_T33Vspike_2_A	CD2 antigen cytoplasmic tail-binding protein 2 OS=Homo sapiens GN=CD2BP2 PE=1 SV=1	CD2B2_HUMAN	37 647,2	1	4	4	6	0.00025	0.158	GNLGVYQETR	R	E	0.968	2.43	0.381	1 136,5695
EC_212270_T33Vspike_2_A	CD2 antigen cytoplasmic tail-binding protein 2 OS=Homo sapiens GN=CD2BP2 PE=1 SV=1	CD2B2_HUMAN	37 647,2	1	4	4	6	0.00025	0.158	LSGLADQMVAR	R	G	0.987	2.53	0.316	1 160,6093
EC_212270_T33Vspike_2_A	CD2 antigen cytoplasmic tail-binding protein 2 OS=Homo sapiens GN=CD2BP2 PE=1 SV=1	CD2B2_HUMAN	37 647,2	1	4	4	6	0.00025	0.158	LVDPVAGSGGPGSR	K	F	0.995	3.02	0.375	1 268,6595
EC_212270_T33Vspike_2_A	CD2 antigen cytoplasmic tail-binding protein 2 OS=Homo sapiens GN=CD2BP2 PE=1 SV=1	CD2B2_HUMAN	37 647,2	1	4	4	6	0.00025	0.158	VTFQGVGDEEDEDEIIVPK	K	K	0.997	4.16	0.417	2 119,0081
EC_212270_T33Vspike_2_B	CD2 antigen cytoplasmic tail-binding protein 2 OS=Homo sapiens GN=CD2BP2 PE=1 SV=1	CD2B2_HUMAN	37 647,2	1	2	2	2	8.71e-05	0.0968	LVDPVAGSGGPGSR	K	F	0.997	3.18	0.433	1 268,6595
EC_212270_T33Vspike_2_B	CD2 antigen cytoplasmic tail-binding protein 2 OS=Homo sapiens GN=CD2BP2 PE=1 SV=1	CD2B2_HUMAN	37 647,2	1	2	2	2	8.71e-05	0.0968	VTFQGVGDEEDEDEIIVPK	K	K	0.932	2.88	0.216	2 119,0081
EC_212270_T33Vspike_4_A	CD2 antigen cytoplasmic tail-binding protein 2 OS=Homo sapiens GN=CD2BP2 PE=1 SV=1	CD2B2_HUMAN	37 647,2	1	2	2	2	8.05e-05	0.0733	LSGLADQMVAR	R	G	0.938	2.72	0.207	1 160,6093
EC_212270_T33Vspike_4_A	CD2 antigen cytoplasmic tail-binding protein 2 OS=Homo sapiens GN=CD2BP2 PE=1 SV=1	CD2B2_HUMAN	37 647,2	1	2	2	2	8.05e-05	0.0733	LVDPVAGSGGPGSR	K	F	0.997	2.98	0.469	1 268,6595
EC_212270_T33Vspike_4_B	CD2 antigen cytoplasmic tail-binding protein 2 OS=Homo sapiens GN=CD2BP2 PE=1 SV=1	CD2B2_HUMAN	37 647,2	1	2	2	2	7.93e-05	0.0733	LSGLADQMVAR	R	G	0.921	2.94	0.22	1 160,6093
EC_212270_T33Vspike_4_B	CD2 antigen cytoplasmic tail-binding protein 2 OS=Homo sapiens GN=CD2BP2 PE=1 SV=1	CD2B2_HUMAN	37 647,2	1	2	2	2	7.93e-05	0.0733	LVDPVAGSGGPGSR	K	F	0.997	3.32	0.465	1 268,6595
EC_212270_T33Vspike_5_A	CD2 antigen cytoplasmic tail-binding protein 2 OS=Homo sapiens GN=CD2BP2 PE=1 SV=1	CD2B2_HUMAN	37 647,2	1	2	2	3	0.000127	0.0733	LSGLADQMVAR	R	G	0.965	2.92	0.218	1 160,6093
EC_212270_T33Vspike_5_A	CD2 antigen cytoplasmic tail-binding protein 2 OS=Homo sapiens GN=CD2BP2 PE=1 SV=1	CD2B2_HUMAN	37 647,2	1	2	2	3	0.000127	0.0733	LVDPVAGSGGPGSR	K	F	0.997	3.34	0.467	1 268,6595
EC_212270_T33Vspike_7_A	CD2 antigen cytoplasmic tail-binding protein 2 OS=Homo sapiens GN=CD2BP2 PE=1 SV=1	CD2B2_HUMAN	37 647,2	0.999	2	2	4	0.000181	0.0733	LSGLADQMVAR	R	G	0.813	2.41	0.0919	1 160,6093
EC_212270_T33Vspike_7_A	CD2 antigen cytoplasmic tail-binding protein 2 OS=Homo sapiens GN=CD2BP2 PE=1 SV=1	CD2B2_HUMAN	37 647,2	0.999	2	2	4	0.000181	0.0733	LVDPVAGSGGPGSR	K	F	0.997	3.49	0.423	1 268,6595
EC_212270_T33Vspike_7_B	CD2 antigen cytoplasmic tail-binding protein 2 OS=Homo sapiens GN=CD2BP2 PE=1 SV=1	CD2B2_HUMAN	37 647,2	1	3	3	5	0.000227	0.129	LSGLADQMVAR	R	G	0.997	3.92	0.322	1 160,6093
EC_212270_T33Vspike_7_B	CD2 antigen cytoplasmic tail-binding protein 2 OS=Homo sapiens GN=CD2BP2 PE=1 SV=1	CD2B2_HUMAN	37 647,2	1	3	3	5	0.000227	0.129	LVDPVAGSGGPGSR	K	F	0.997	2.67	0.404	1 268,6595
EC_212270_T33Vspike_7_B	CD2 antigen cytoplasmic tail-binding protein 2 OS=Homo sapiens GN=CD2BP2 PE=1 SV=1	CD2B2_HUMAN	37 647,2	1	3	3	5	0.000227	0.129	VTFQGVGDEEDEDEIIVPK	K	K	0.977	3.01	0.391	2 119,0081
EC_212270_T33Vspike_1_A	10 kDa heat shock protein, mitochondrial OS=Bos taurus GN=HSPE1 PE=3 SV=2	CH10_BOVIN	10 931,8	1	10	13	17	0.000731	0.676	DGDILGKYVD	R	-	0.954	2.04	0.406	1 094,5367
EC_212270_T33Vspike_1_A	10 kDa heat shock protein, mitochondrial OS=Bos taurus GN=HSPE1 PE=3 SV=2	CH10_BOVIN	10 931,8	1	10	13	17	0.000731	0.676	FLPLFDRVLVER	K	S	0.96	2.51	0.299	1 503,8683
EC_212270_T33Vspike_1_A	10 kDa heat shock protein, mitochondrial OS=Bos taurus GN=HSPE1 PE=3 SV=2	CH10_BOVIN	10 931,8	1	10	13	17	0.000731	0.676	GGIMLPEKSQGKVLQATVVAVGSGSK	K	G	0.997	4.06	0.452	2 541,4072
EC_212270_T33Vspike_1_A	10 kDa heat shock protein, mitochondrial OS=Bos taurus GN=HSPE1 PE=3 SV=2	CH10_BOVIN	10 931,8	1	10	13	17	0.000731	0.676	KFLPLFDRVLVER	R	S	0.918	2.1	0.263	1 631,9633
EC_212270_T33Vspike_1_A	10 kDa heat shock protein, mitochondrial OS=Bos taurus GN=HSPE1 PE=3 SV=2	CH10_BOVIN	10 931,8	1	10	13	17	0.000731	0.676	SAAETVTKGGIMLPEK	R	S	0.997	3.95	0.407	1 631,8675
EC_212270_T33Vspike_1_A	10 kDa heat shock protein, mitochondrial OS=Bos taurus GN=HSPE1 PE=3 SV=2	CH10_BOVIN	10 931,8	1	10	13	17	0.000731	0.676	SAAETVTKGGIMLPEKSQGK	R	V	0.942	2.21	0.133	2 048,0696
EC_212270_T33Vspike_1_A	10 kDa heat shock protein, mitochondrial OS=Bos taurus GN=HSPE1 PE=3 SV=2	CH10_BOVIN	10 931,8	1	10	13	17	0.000731	0.676	SQGKVLQATVVAVGSGSKGK	K	G	0.95	2.39	0.408	1 901,0816
EC_212270_T33Vspike_1_A	10 kDa heat shock protein, mitochondrial OS=Bos taurus GN=HSPE1 PE=3 SV=2	CH10_BOVIN	10 931,8	1	10	13	17	0.000731	0.676	VLQATVVAVGSGSK	K	G	0.997	5.43	0.625	1 315,7580
EC_212270_T33Vspike_1_A	10 kDa heat shock protein, mitochondrial OS=Bos taurus GN=HSPE1 PE=3 SV=2	CH10_BOVIN	10 931,8	1	10	13	17	0.000731	0.676	VLQATVVAVGSGSKGK	K	G	0.976	2.73	0.514	1 500,8745
EC_212270_T33Vspike_1_A	10 kDa heat shock protein, mitochondrial OS=Bos taurus GN=HSPE1 PE=3 SV=2	CH10_BOVIN	10 931,8	1	10	13	17	0.000731	0.676	VLQATVVAVGSGSKGKGGEIQPVSVK	K	V	0.937	2.42	0.415	2 495,4194
EC_212270_T33Vspike_1_B	10 kDa heat shock protein, mitochondrial OS=Bos taurus GN=HSPE1 PE=3 SV=2	CH10_BOVIN	10 931,8	1	8	10	14	0.000636	0.686	FLPLFDRVLVER	K	S	0.968	2.58	0.328	1 503,8683
EC_212270_T33Vspike_1_B	10 kDa heat shock protein, mitochondrial OS=Bos taurus GN=HSPE1 PE=3 SV=2	CH10_BOVIN	10 931,8	1	8	10	14	0.000636	0.686	GGIMLPEKSQGKVLQATVVAVGSGSK	K	G	0.997	4.18	0.405	2 541,4072
EC_212270_T33Vspike_1_B	10 kDa heat shock protein, mitochondrial OS=Bos taurus GN=HSPE1 PE=3 SV=2	CH10_BOVIN	10 931,8	1	8	10	14	0.000636	0.686	SAAETVTKGGIMLPEK	R	S	0.997	3.68	0.382	1 631,8675
EC_212270_T33Vspike_1_B	10 kDa heat shock protein, mitochondrial OS=Bos taurus GN=HSPE1 PE=3 SV=2	CH10_BOVIN	10 931,8	1	8	10	14	0.000636	0.686	SAAETVTKGGIMLPEKSQGK	R	V	0.995	3.42	0.234	2 032,0746
EC_212270_T33Vspike_1_B	10 kDa heat shock protein, mitochondrial OS=Bos taurus GN=HSPE1 PE=3 SV=2	CH10_BOVIN	10 931,8	1	8	10	14	0.000636	0.686	VLQATVVAVGSGSK	K	G	0.997	5.13	0.681	1 315,7580
EC_212270_T33Vspike_1_B	10 kDa heat shock protein, mitochondrial OS=Bos taurus GN=HSPE1 PE=3 SV=2	CH10_BOVIN	10 931,8	1	8	10	14	0.000636	0.686	VLQATVVAVGSGSKGK	K	G	0.859	1.83	0.345	1 500,8745
EC_212270_T33Vspike_1_B	10 kDa heat shock protein, mitochondrial OS=Bos taurus GN=HSPE1 PE=3 SV=2	CH10_BOVIN	10 931,8	1	8	10	14	0.000636	0.686	VLQATVVAVGSGSKGKGGEIQPVSVK	K	V	0.873	2.41	0.322	2 495,4194
EC_212270_T33Vspike_1_B	10 kDa heat shock protein, mitochondrial OS=Bos taurus GN=HSPE1 PE=3 SV=2	CH10_BOVIN	10 931,8	1	8	10	14	0.000636	0.686	VVLDDKDYFLFR	K	D	0.978	2.79	0.418	1 529,8000
EC_212270_T33Vspike_2_A	10 kDa heat shock protein, mitochondrial OS=Bos taurus GN=HSPE1 PE=3 SV=2	CH10_BOVIN	10 931,8	1	10	12	16	0.000668	0.608	FLPLFDRVLVER	K	S	0.935	2.23	0.368	1 503,8683
EC_212270_T33Vspike_2_A	10 kDa heat shock protein, mitochondrial OS=Bos taurus GN=HSPE1 PE=3 SV=2	CH10_BOVIN	10 931,8	1	10	12	16	0.000668	0.608	GGIMLPEKSQGK	K	V	0.931	2.84	0.259	1 244,6670
EC_212270_T33Vspike_2_A	10 kDa heat shock protein, mitochondrial OS=Bos taurus GN=HSPE1 PE=3 SV=2	CH10_BOVIN	10 931,8	1	10	12	16	0.000668	0.608	GGIMLPEKSQGKVLQATVVAVGSGSK	K	G	0.993	3.4	0.403	2 541,4072
EC_212270_T33Vspike_2_A	10 kDa heat shock protein, mitochondrial OS=Bos taurus GN=HSPE1 PE=3 SV=2	CH10_BOVIN	10 931,8	1	10	12	16	0.000668	0.608	SAAETVTKGGIMLPEK	R	S	0.997	3.29	0.38	1 631,8675
EC_212270_T33Vspike_2_A	10 kDa heat shock protein, mitochondrial OS=Bos taurus GN=HSPE1 PE=3 SV=2	CH10_BOVIN	10 931,8	1	10	12	16	0.000668	0.608	SAAETVTKGGIMLPEKSQGK	R	V	0.997	3.85	0.325	2 032,0746
EC_212270_T33Vspike_2_A	10 kDa heat shock protein, mitochondrial OS=Bos taurus GN=HSPE1 PE=3 SV=2	CH10_BOVIN	10 931,8	1	10	12	16	0.000668	0.608	SQGKVLQATVVAVGSGSKGK	K	G	0.765	2.33	0.195	1 901,0816
EC_212270_T33Vspike_2_A	10 kDa heat shock protein, mitochondrial OS=Bos taurus GN=HSPE1 PE=3 SV=2	CH10_BOVIN	10 931,8	1	10	12	16	0.000668	0.608	VGDKVLLPEYGGTK	K	V	0.994	3.29	0.419	1 475,8107
EC_212270_T33Vspike_2_A	10 kDa heat shock protein, mitochondrial OS=Bos taurus GN=HSPE1 PE=3 SV=2	CH10_BOVIN	10 931,8	1	10	12	16	0.000668	0.608	VLQATVVAVGSGSK	K	G	0.997	4.84	0.663	1 315,7580
EC_212270_T33Vspike_2_A	10 kDa heat shock protein, mitochondrial OS=Bos taurus GN=HSPE1 PE=3 SV=2	CH10_BOVIN	10 931,8	1	10	12	16	0.000668	0.608	VLQATVVAVGSGSKGK	K	G	0.997	3.05	0.487	1 500,8745
EC_212270_T33Vspike_2_A	10 kDa heat shock protein, mitochondrial OS=Bos taurus GN=HSPE1 PE=3 SV=2	CH10_BOVIN	10 931,8	1	10	12	16	0.000668	0.608	VLVERSAAETVTK	R	G	0.901	2.51	0.246	1 402,7900
EC_212270_T33Vspike_2_B	10 kDa heat shock protein, mitochondrial OS=Bos taurus GN=HSPE1 PE=3 SV=2	CH10_BOVIN	10 931,8	1	9	12	16	0.000697	0.578	FLPLFDRVLVER	K	S	0.925	2.35	0.281	1 503,8683
EC_212270_T33Vspike_2_B	10 kDa heat shock protein, mitochondrial OS=Bos taurus GN=HSPE1 PE=3 SV=2	CH10_BOVIN	10 931,8	1	9	12	16	0.000697	0.578	GGIMLPEKSQGKVLQATVVAVGSGSK	K	G	0.997	3.9	0.425	2 541,4072
EC_212270_T33Vspike_2_B	10 kDa heat shock protein, mitochondrial OS=Bos taurus GN=HSPE1 PE=3 SV=2	CH10_BOVIN	10 931,8	1	9	12	16	0.000697	0.578	KFLPLFDRVLVER	R	S	0.81	2.24	0.18	1 631,9633
EC_212270_T33Vspike_2_B	10 kDa heat shock protein, mitochondrial OS=Bos taurus GN=HSPE1 PE=3 SV=2	CH10_BOVIN	10 931,8	1	9	12	16	0.000697	0.578	SAAETVTKGGIMLPEK	R	S	0.997	2.7	0.255	1 631,8675
EC_212270_T33Vspike_2_B	10 kDa heat shock protein, mitochondrial OS=Bos taurus GN=HSPE1 PE=3 SV=2	CH10_BOVIN	10 931,8	1	9	12	16	0.000697	0.578	SAAETVTKGGIMLPEKSQGK	R	V	0.997	3.77	0.263	2 032,0746
EC_212270_T33Vspike_2_B	10 kDa heat shock protein, mitochondrial OS=Bos taurus GN=HSPE1 PE=3 SV=2	CH10_BOVIN	10 931,8	1	9	12	16	0.000697	0.578	VLQATVVAVGSGSK	K	G	0.997	5.07	0.65	1 315,7580
EC_212270_T33Vspike_2_B	10 kDa heat shock protein, mitochondrial OS=Bos taurus GN=HSPE1 PE=3 SV=2	CH10_BOVIN	10 931,8	1	9	12	16	0.000697	0.578	VLQATVVAVGSGSKGK	K	G	0.986	3	0.475	1 500,8745
EC_212270_T33Vspike_2_B	10 kDa heat shock protein, mitochondrial OS=Bos taurus GN=HSPE1 PE=3 SV=2	CH10_BOVIN	10 931,8	1	9	12	16	0.000697	0.578	VLQATVVAVGSGSKGKGGEIQPVSVK	K	V	0.997	3.51	0.506	2 495,4194
EC_212270_T33Vspike_2_B	10 kDa heat shock protein, mitochondrial OS=Bos taurus GN=HSPE1 PE=3 SV=2	CH10_BOVIN	10 931,8	1	9	12	16	0.000697	0.578	VLVERSAAETVTK	R	G	0.917	2.84	0.256	1 402,7900
EC_212270_T33Vspike_3_A	10 kDa heat shock protein, mitochondrial OS=Bos taurus GN=HSPE1 PE=3 SV=2	CH10_BOVIN	10 931,8	1	5	5	20	0.00101	0.716	FLPLFDR	K	V	0.186	1.15	0	907.504
EC_212270_T33Vspike_3_A	10 kDa heat shock protein, mitochondrial OS=Bos taurus GN=HSPE1 PE=3 SV=2	CH10_BOVIN	10 931,8	1	5	5	20	0.00101	0.716	FLPLFDRVLVER	K	S	0.888	2.23	0.261	1 503,8683
EC_212270_T33Vspike_3_A	10 kDa heat shock protein, mitochondrial OS=Bos taurus GN=HSPE1 PE=3 SV=2	CH10_BOVIN	10 931,8	1	5	5	20	0.00101	0.716	GGEIQPVSVK	K	V	0.311	2.44	0.131	1 013,5627
EC_212270_T33Vspike_3_A	10 kDa heat shock protein, mitochondrial OS=Bos taurus GN=HSPE1 PE=3 SV=2	CH10_BOVIN	10 931,8	1	5	5	20	0.00101	0.716	GKGGEIQPVSVK	K	V	0.26	1.59	0.0866	1 198,6792
EC_212270_T33Vspike_3_A	10 kDa heat shock protein, mitochondrial OS=Bos taurus GN=HSPE1 PE=3 SV=2	CH10_BOVIN	10 931,8	1	5	5	20	0.00101	0.716	KFLPLFDRVLVER	R	S	0.876	2.56	0.288	1 631,9633
EC_212270_T33Vspike_3_A	10 kDa heat shock protein, mitochondrial OS=Bos taurus GN=HSPE1 PE=3 SV=2	CH10_BOVIN	10 931,8	1	5	5	20	0.00101	0.716	SAAETVTKGGIMLPEK	R	S	0.997	3.37	0.323	1 631,8675
EC_212270_T33Vspike_3_A	10 kDa heat shock protein, mitochondrial OS=Bos taurus GN=HSPE1 PE=3 SV=2	CH10_BOVIN	10 931,8	1	5	5	20	0.00101	0.716	SAAETVTKGGIMLPEKSQGK	R	V	0.997	3.87	0.274	2 032,0746
EC_212270_T33Vspike_3_A	10 kDa heat shock protein, mitochondrial OS=Bos taurus GN=HSPE1 PE=3 SV=2	CH10_BOVIN	10 931,8	1	5	5	20	0.00101	0.716	VGDKVLLPEYGGTK	K	V	0.253	1.6	0.0272	1 475,8107
EC_212270_T33Vspike_3_A	10 kDa heat shock protein, mitochondrial OS=Bos taurus GN=HSPE1 PE=3 SV=2	CH10_BOVIN	10 931,8	1	5	5	20	0.00101	0.716	VLQATVVAVGSGSK	K	G	0.997	5.23	0.674	1 315,7580
EC_212270_T33Vspike_3_A	10 kDa heat shock protein, mitochondrial OS=Bos taurus GN=HSPE1 PE=3 SV=2	CH10_BOVIN	10 931,8	1	5	5	20	0.00101	0.716	VLQATVVAVGSGSKGK	K	G	0.859	1.89	0.409	1 500,8745
EC_212270_T33Vspike_3_A	10 kDa heat shock protein, mitochondrial OS=Bos taurus GN=HSPE1 PE=3 SV=2	CH10_BOVIN	10 931,8	1	5	5	20	0.00101	0.716	VLQATVVAVGSGSKGKGGEIQPVSVK	K	V	0.843	2.63	0.262	2 495,4194
EC_212270_T33Vspike_3_B	10 kDa heat shock protein, mitochondrial OS=Bos taurus GN=HSPE1 PE=3 SV=2	CH10_BOVIN	10 931,8	1	5	5	15	0.000787	0.765	FLPLFDRVLVER	K	S	0.679	2.2	0.245	1 503,8683
EC_212270_T33Vspike_3_B	10 kDa heat shock protein, mitochondrial OS=Bos taurus GN=HSPE1 PE=3 SV=2	CH10_BOVIN	10 931,8	1	5	5	15	0.000787	0.765	GGEIQPVSVK	K	V	0.088	1.93	0.0196	1 013,5627
EC_212270_T33Vspike_3_B	10 kDa heat shock protein, mitochondrial OS=Bos taurus GN=HSPE1 PE=3 SV=2	CH10_BOVIN	10 931,8	1	5	5	15	0.000787	0.765	KFLPLFDRVLVER	R	S	0.941	3.06	0.309	1 631,9633
EC_212270_T33Vspike_3_B	10 kDa heat shock protein, mitochondrial OS=Bos taurus GN=HSPE1 PE=3 SV=2	CH10_BOVIN	10 931,8	1	5	5	15	0.000787	0.765	SAAETVTKGGIMLPEK	R	S	0.679	2.17	0.117	1 631,8675
EC_212270_T33Vspike_3_B	10 kDa heat shock protein, mitochondrial OS=Bos taurus GN=HSPE1 PE=3 SV=2	CH10_BOVIN	10 931,8	1	5	5	15	0.000787	0.765	SAAETVTKGGIMLPEKSQGK	R	V	0.997	3.58	0.321	2 032,0746
EC_212270_T33Vspike_3_B	10 kDa heat shock protein, mitochondrial OS=Bos taurus GN=HSPE1 PE=3 SV=2	CH10_BOVIN	10 931,8	1	5	5	15	0.000787	0.765	VLQATVVAVGSGSK	K	G	0.997	4.86	0.711	1 315,7580
EC_212270_T33Vspike_3_B	10 kDa heat shock protein, mitochondrial OS=Bos taurus GN=HSPE1 PE=3 SV=2	CH10_BOVIN	10 931,8	1	5	5	15	0.000787	0.765	VLQATVVAVGSGSKGK	K	G	0.625	1.92	0.335	1 500,8745
EC_212270_T33Vspike_3_B	10 kDa heat shock protein, mitochondrial OS=Bos taurus GN=HSPE1 PE=3 SV=2	CH10_BOVIN	10 931,8	1	5	5	15	0.000787	0.765	VLQATVVAVGSGSKGKGGEIQPVSVK	K	V	0.284	1.91	0.0788	2 495,4194
EC_212270_T33Vspike_3_B	10 kDa heat shock protein, mitochondrial OS=Bos taurus GN=HSPE1 PE=3 SV=2	CH10_BOVIN	10 931,8	1	5	5	15	0.000787	0.765	VVLDDKDYFLFRDGDILGK	K	Y	0.125	1.51	-0.0439	2 228,1602
EC_212270_T33Vspike_4_A	10 kDa heat shock protein, mitochondrial OS=Bos taurus GN=HSPE1 PE=3 SV=2	CH10_BOVIN	10 931,8	1	3	3	10	0.000403	0.48	FLPLFDRVLVER	K	S	0.901	2.35	0.252	1 503,8683
EC_212270_T33Vspike_4_A	10 kDa heat shock protein, mitochondrial OS=Bos taurus GN=HSPE1 PE=3 SV=2	CH10_BOVIN	10 931,8	1	3	3	10	0.000403	0.48	GGIMLPEKSQGKVLQATVVAVGSGSK	K	G	0.965	3.4	0.429	2 541,4072
EC_212270_T33Vspike_4_A	10 kDa heat shock protein, mitochondrial OS=Bos taurus GN=HSPE1 PE=3 SV=2	CH10_BOVIN	10 931,8	1	3	3	10	0.000403	0.48	KFLPLFDRVLVER	R	S	0.925	2.53	0.403	1 631,9633
EC_212270_T33Vspike_4_A	10 kDa heat shock protein, mitochondrial OS=Bos taurus GN=HSPE1 PE=3 SV=2	CH10_BOVIN	10 931,8	1	3	3	10	0.000403	0.48	SAAETVTKGGIMLPEK	R	S	0.994	2.66	0.193	1 631,8675
EC_212270_T33Vspike_4_A	10 kDa heat shock protein, mitochondrial OS=Bos taurus GN=HSPE1 PE=3 SV=2	CH10_BOVIN	10 931,8	1	3	3	10	0.000403	0.48	SAAETVTKGGIMLPEKSQGK	R	V	0.997	3.12	0.18	2 032,0746
EC_212270_T33Vspike_4_A	10 kDa heat shock protein, mitochondrial OS=Bos taurus GN=HSPE1 PE=3 SV=2	CH10_BOVIN	10 931,8	1	3	3	10	0.000403	0.48	VLQATVVAVGSGSK	K	G	0.997	5.18	0.658	1 315,7580
EC_212270_T33Vspike_4_A	10 kDa heat shock protein, mitochondrial OS=Bos taurus GN=HSPE1 PE=3 SV=2	CH10_BOVIN	10 931,8	1	3	3	10	0.000403	0.48	VLQATVVAVGSGSKGK	K	G	0.975	2.91	0.458	1 500,8745
EC_212270_T33Vspike_4_B	10 kDa heat shock protein, mitochondrial OS=Bos taurus GN=HSPE1 PE=3 SV=2	CH10_BOVIN	10 931,8	1	4	4	9	0.000357	0.451	GGIMLPEKSQGKVLQATVVAVGSGSK	K	G	0.997	3.77	0.468	2 541,4072
EC_212270_T33Vspike_4_B	10 kDa heat shock protein, mitochondrial OS=Bos taurus GN=HSPE1 PE=3 SV=2	CH10_BOVIN	10 931,8	1	4	4	9	0.000357	0.451	GKGGEIQPVSVK	K	V	0.96	2.71	0.385	1 198,6792
EC_212270_T33Vspike_4_B	10 kDa heat shock protein, mitochondrial OS=Bos taurus GN=HSPE1 PE=3 SV=2	CH10_BOVIN	10 931,8	1	4	4	9	0.000357	0.451	SAAETVTKGGIMLPEK	R	S	0.997	4.27	0.309	1 631,8675
EC_212270_T33Vspike_4_B	10 kDa heat shock protein, mitochondrial OS=Bos taurus GN=HSPE1 PE=3 SV=2	CH10_BOVIN	10 931,8	1	4	4	9	0.000357	0.451	SAAETVTKGGIMLPEKSQGK	R	V	0.997	3.9	0.351	2 032,0746
EC_212270_T33Vspike_4_B	10 kDa heat shock protein, mitochondrial OS=Bos taurus GN=HSPE1 PE=3 SV=2	CH10_BOVIN	10 931,8	1	4	4	9	0.000357	0.451	VLQATVVAVGSGSK	K	G	0.997	4.88	0.638	1 315,7580
EC_212270_T33Vspike_4_B	10 kDa heat shock protein, mitochondrial OS=Bos taurus GN=HSPE1 PE=3 SV=2	CH10_BOVIN	10 931,8	1	4	4	9	0.000357	0.451	VLQATVVAVGSGSKGKGGEIQPVSVK	K	V	0.997	3.71	0.437	2 495,4194
EC_212270_T33Vspike_5_A	10 kDa heat shock protein, mitochondrial OS=Bos taurus GN=HSPE1 PE=3 SV=2	CH10_BOVIN	10 931,8	1	7	8	12	0.000507	0.451	GGIMLPEKSQGKVLQATVVAVGSGSK	K	G	0.997	3.71	0.496	2 541,4072
EC_212270_T33Vspike_5_A	10 kDa heat shock protein, mitochondrial OS=Bos taurus GN=HSPE1 PE=3 SV=2	CH10_BOVIN	10 931,8	1	7	8	12	0.000507	0.451	GKGGEIQPVSVK	K	V	0.966	2.95	0.358	1 198,6792
EC_212270_T33Vspike_5_A	10 kDa heat shock protein, mitochondrial OS=Bos taurus GN=HSPE1 PE=3 SV=2	CH10_BOVIN	10 931,8	1	7	8	12	0.000507	0.451	SAAETVTKGGIMLPEK	R	S	0.992	2.73	0.382	1 631,8675
EC_212270_T33Vspike_5_A	10 kDa heat shock protein, mitochondrial OS=Bos taurus GN=HSPE1 PE=3 SV=2	CH10_BOVIN	10 931,8	1	7	8	12	0.000507	0.451	SAAETVTKGGIMLPEKSQGK	R	V	0.997	3.51	0.195	2 032,0746
EC_212270_T33Vspike_5_A	10 kDa heat shock protein, mitochondrial OS=Bos taurus GN=HSPE1 PE=3 SV=2	CH10_BOVIN	10 931,8	1	7	8	12	0.000507	0.451	VLQATVVAVGSGSK	K	G	0.997	4.64	0.668	1 315,7580
EC_212270_T33Vspike_5_A	10 kDa heat shock protein, mitochondrial OS=Bos taurus GN=HSPE1 PE=3 SV=2	CH10_BOVIN	10 931,8	1	7	8	12	0.000507	0.451	VLQATVVAVGSGSKGK	K	G	0.91	1.86	0.41	1 500,8745
EC_212270_T33Vspike_5_A	10 kDa heat shock protein, mitochondrial OS=Bos taurus GN=HSPE1 PE=3 SV=2	CH10_BOVIN	10 931,8	1	7	8	12	0.000507	0.451	VLQATVVAVGSGSKGKGGEIQPVSVK	K	V	0.997	3.08	0.407	2 495,4194
EC_212270_T33Vspike_5_B	10 kDa heat shock protein, mitochondrial OS=Bos taurus GN=HSPE1 PE=3 SV=2	CH10_BOVIN	10 931,8	1	7	7	10	0.00051	0.578	FLPLFDRVLVER	K	S	0.911	2.25	0.319	1 503,8683
EC_212270_T33Vspike_5_B	10 kDa heat shock protein, mitochondrial OS=Bos taurus GN=HSPE1 PE=3 SV=2	CH10_BOVIN	10 931,8	1	7	7	10	0.00051	0.578	KFLPLFDRVLVER	R	S	0.973	3.11	0.364	1 631,9633
EC_212270_T33Vspike_5_B	10 kDa heat shock protein, mitochondrial OS=Bos taurus GN=HSPE1 PE=3 SV=2	CH10_BOVIN	10 931,8	1	7	7	10	0.00051	0.578	SAAETVTKGGIMLPEK	R	S	0.964	2.74	0.287	1 631,8675
EC_212270_T33Vspike_5_B	10 kDa heat shock protein, mitochondrial OS=Bos taurus GN=HSPE1 PE=3 SV=2	CH10_BOVIN	10 931,8	1	7	7	10	0.00051	0.578	SAAETVTKGGIMLPEKSQGK	R	V	0.997	3.43	0.292	2 032,0746
EC_212270_T33Vspike_5_B	10 kDa heat shock protein, mitochondrial OS=Bos taurus GN=HSPE1 PE=3 SV=2	CH10_BOVIN	10 931,8	1	7	7	10	0.00051	0.578	VLQATVVAVGSGSK	K	G	0.997	4.91	0.645	1 315,7580
EC_212270_T33Vspike_5_B	10 kDa heat shock protein, mitochondrial OS=Bos taurus GN=HSPE1 PE=3 SV=2	CH10_BOVIN	10 931,8	1	7	7	10	0.00051	0.578	VLQATVVAVGSGSKGK	K	G	0.944	2.38	0.466	1 500,8745
EC_212270_T33Vspike_5_B	10 kDa heat shock protein, mitochondrial OS=Bos taurus GN=HSPE1 PE=3 SV=2	CH10_BOVIN	10 931,8	1	7	7	10	0.00051	0.578	VLQATVVAVGSGSKGKGGEIQPVSVK	K	V	0.953	2.64	0.391	2 495,4194
EC_212270_T33Vspike_6_A	10 kDa heat shock protein, mitochondrial OS=Bos taurus GN=HSPE1 PE=3 SV=2	CH10_BOVIN	10 931,8	1	2	2	5	0.000277	0.353	SAAETVTKGGIMLPEKSQGK	R	V	0.997	3.58	0.357	2 032,0746
EC_212270_T33Vspike_6_A	10 kDa heat shock protein, mitochondrial OS=Bos taurus GN=HSPE1 PE=3 SV=2	CH10_BOVIN	10 931,8	1	2	2	5	0.000277	0.353	VLQATVVAVGSGSK	K	G	0.997	4.81	0.65	1 315,7580
EC_212270_T33Vspike_6_A	10 kDa heat shock protein, mitochondrial OS=Bos taurus GN=HSPE1 PE=3 SV=2	CH10_BOVIN	10 931,8	1	2	2	5	0.000277	0.353	VLQATVVAVGSGSKGK	K	G	0.997	3.54	0.466	1 500,8745
EC_212270_T33Vspike_6_B	10 kDa heat shock protein, mitochondrial OS=Bos taurus GN=HSPE1 PE=3 SV=2	CH10_BOVIN	10 931,8	1	3	3	7	0.000419	0.549	DGDILGKYVD	R	-	0.965	2.25	0.495	1 094,5367
EC_212270_T33Vspike_6_B	10 kDa heat shock protein, mitochondrial OS=Bos taurus GN=HSPE1 PE=3 SV=2	CH10_BOVIN	10 931,8	1	3	3	7	0.000419	0.549	SAAETVTKGGIMLPEK	R	S	0.957	2.51	0.263	1 631,8675
EC_212270_T33Vspike_6_B	10 kDa heat shock protein, mitochondrial OS=Bos taurus GN=HSPE1 PE=3 SV=2	CH10_BOVIN	10 931,8	1	3	3	7	0.000419	0.549	SAAETVTKGGIMLPEKSQGK	R	V	0.997	3.79	0.274	2 032,0746
EC_212270_T33Vspike_6_B	10 kDa heat shock protein, mitochondrial OS=Bos taurus GN=HSPE1 PE=3 SV=2	CH10_BOVIN	10 931,8	1	3	3	7	0.000419	0.549	VLQATVVAVGSGSK	K	G	0.997	4.16	0.662	1 315,7580
EC_212270_T33Vspike_6_B	10 kDa heat shock protein, mitochondrial OS=Bos taurus GN=HSPE1 PE=3 SV=2	CH10_BOVIN	10 931,8	1	3	3	7	0.000419	0.549	VLQATVVAVGSGSKGKGGEIQPVSVK	K	V	0.975	2.56	0.382	2 495,4194
EC_212270_T33Vspike_7_A	10 kDa heat shock protein, mitochondrial OS=Bos taurus GN=HSPE1 PE=3 SV=2	CH10_BOVIN	10 931,8	1	9	9	12	0.000542	0.578	FLPLFDRVLVER	K	S	0.756	1.9	0.249	1 503,8683
EC_212270_T33Vspike_7_A	10 kDa heat shock protein, mitochondrial OS=Bos taurus GN=HSPE1 PE=3 SV=2	CH10_BOVIN	10 931,8	1	9	9	12	0.000542	0.578	GGIMLPEKSQGKVLQATVVAVGSGSK	K	G	0.972	3.37	0.409	2 541,4072
EC_212270_T33Vspike_7_A	10 kDa heat shock protein, mitochondrial OS=Bos taurus GN=HSPE1 PE=3 SV=2	CH10_BOVIN	10 931,8	1	9	9	12	0.000542	0.578	GKGGEIQPVSVK	K	V	0.788	2.22	0.304	1 198,6792
EC_212270_T33Vspike_7_A	10 kDa heat shock protein, mitochondrial OS=Bos taurus GN=HSPE1 PE=3 SV=2	CH10_BOVIN	10 931,8	1	9	9	12	0.000542	0.578	KFLPLFDRVLVER	R	S	0.822	2.07	0.312	1 631,9633
EC_212270_T33Vspike_7_A	10 kDa heat shock protein, mitochondrial OS=Bos taurus GN=HSPE1 PE=3 SV=2	CH10_BOVIN	10 931,8	1	9	9	12	0.000542	0.578	SAAETVTKGGIMLPEK	R	S	0.705	2.05	0.07	1 631,8675
EC_212270_T33Vspike_7_A	10 kDa heat shock protein, mitochondrial OS=Bos taurus GN=HSPE1 PE=3 SV=2	CH10_BOVIN	10 931,8	1	9	9	12	0.000542	0.578	SAAETVTKGGIMLPEKSQGK	R	V	0.997	3.51	0.301	2 032,0746
EC_212270_T33Vspike_7_A	10 kDa heat shock protein, mitochondrial OS=Bos taurus GN=HSPE1 PE=3 SV=2	CH10_BOVIN	10 931,8	1	9	9	12	0.000542	0.578	VLQATVVAVGSGSK	K	G	0.997	4.8	0.638	1 315,7580
EC_212270_T33Vspike_7_A	10 kDa heat shock protein, mitochondrial OS=Bos taurus GN=HSPE1 PE=3 SV=2	CH10_BOVIN	10 931,8	1	9	9	12	0.000542	0.578	VLQATVVAVGSGSKGK	K	G	0.933	2.38	0.425	1 500,8745
EC_212270_T33Vspike_7_A	10 kDa heat shock protein, mitochondrial OS=Bos taurus GN=HSPE1 PE=3 SV=2	CH10_BOVIN	10 931,8	1	9	9	12	0.000542	0.578	VLQATVVAVGSGSKGKGGEIQPVSVK	K	V	0.926	2.49	0.402	2 495,4194
EC_212270_T33Vspike_7_B	10 kDa heat shock protein, mitochondrial OS=Bos taurus GN=HSPE1 PE=3 SV=2	CH10_BOVIN	10 931,8	1	8	8	11	0.0005	0.569	FLPLFDRVLVER	K	S	0.91	2.15	0.272	1 503,8683
EC_212270_T33Vspike_7_B	10 kDa heat shock protein, mitochondrial OS=Bos taurus GN=HSPE1 PE=3 SV=2	CH10_BOVIN	10 931,8	1	8	8	11	0.0005	0.569	FLPLFDRVLVERSAAETVTK	K	G	0.729	2.36	0.168	2 291,2759
EC_212270_T33Vspike_7_B	10 kDa heat shock protein, mitochondrial OS=Bos taurus GN=HSPE1 PE=3 SV=2	CH10_BOVIN	10 931,8	1	8	8	11	0.0005	0.569	GGIMLPEKSQGKVLQATVVAVGSGSK	K	G	0.997	3.91	0.465	2 541,4072
EC_212270_T33Vspike_7_B	10 kDa heat shock protein, mitochondrial OS=Bos taurus GN=HSPE1 PE=3 SV=2	CH10_BOVIN	10 931,8	1	8	8	11	0.0005	0.569	GKGGEIQPVSVK	K	V	0.902	2.01	0.316	1 198,6792
EC_212270_T33Vspike_7_B	10 kDa heat shock protein, mitochondrial OS=Bos taurus GN=HSPE1 PE=3 SV=2	CH10_BOVIN	10 931,8	1	8	8	11	0.0005	0.569	SAAETVTKGGIMLPEK	R	S	0.989	3.36	0.114	1 631,8675
EC_212270_T33Vspike_7_B	10 kDa heat shock protein, mitochondrial OS=Bos taurus GN=HSPE1 PE=3 SV=2	CH10_BOVIN	10 931,8	1	8	8	11	0.0005	0.569	SAAETVTKGGIMLPEKSQGK	R	V	0.997	3.86	0.23	2 032,0746
EC_212270_T33Vspike_7_B	10 kDa heat shock protein, mitochondrial OS=Bos taurus GN=HSPE1 PE=3 SV=2	CH10_BOVIN	10 931,8	1	8	8	11	0.0005	0.569	VLQATVVAVGSGSK	K	G	0.997	4.11	0.626	1 315,7580
EC_212270_T33Vspike_7_B	10 kDa heat shock protein, mitochondrial OS=Bos taurus GN=HSPE1 PE=3 SV=2	CH10_BOVIN	10 931,8	1	8	8	11	0.0005	0.569	VLQATVVAVGSGSKGKGGEIQPVSVK	K	V	0.97	2.91	0.357	2 495,4194
EC_212270_T33Vspike_8_A	10 kDa heat shock protein, mitochondrial OS=Bos taurus GN=HSPE1 PE=3 SV=2	CH10_BOVIN	10 931,8	1	5	6	12	0.000563	0.578	GGIMLPEKSQGKVLQATVVAVGSGSK	K	G	0.927	2.59	0.235	2 541,4072
EC_212270_T33Vspike_8_A	10 kDa heat shock protein, mitochondrial OS=Bos taurus GN=HSPE1 PE=3 SV=2	CH10_BOVIN	10 931,8	1	5	6	12	0.000563	0.578	GKGGEIQPVSVK	K	V	0.997	3.41	0.359	1 198,6792
EC_212270_T33Vspike_8_A	10 kDa heat shock protein, mitochondrial OS=Bos taurus GN=HSPE1 PE=3 SV=2	CH10_BOVIN	10 931,8	1	5	6	12	0.000563	0.578	KFLPLFDRVLVER	R	S	0.957	2.78	0.355	1 631,9633
EC_212270_T33Vspike_8_A	10 kDa heat shock protein, mitochondrial OS=Bos taurus GN=HSPE1 PE=3 SV=2	CH10_BOVIN	10 931,8	1	5	6	12	0.000563	0.578	SAAETVTKGGIMLPEK	R	S	0.993	2.97	0.364	1 631,8675
EC_212270_T33Vspike_8_A	10 kDa heat shock protein, mitochondrial OS=Bos taurus GN=HSPE1 PE=3 SV=2	CH10_BOVIN	10 931,8	1	5	6	12	0.000563	0.578	SAAETVTKGGIMLPEKSQGK	R	V	0.997	4.56	0.429	2 032,0746
EC_212270_T33Vspike_8_A	10 kDa heat shock protein, mitochondrial OS=Bos taurus GN=HSPE1 PE=3 SV=2	CH10_BOVIN	10 931,8	1	5	6	12	0.000563	0.578	VLQATVVAVGSGSK	K	G	0.997	4.7	0.685	1 315,7580
EC_212270_T33Vspike_8_A	10 kDa heat shock protein, mitochondrial OS=Bos taurus GN=HSPE1 PE=3 SV=2	CH10_BOVIN	10 931,8	1	5	6	12	0.000563	0.578	VLQATVVAVGSGSKGK	K	G	0.997	3.86	0.444	1 500,8745
EC_212270_T33Vspike_8_A	10 kDa heat shock protein, mitochondrial OS=Bos taurus GN=HSPE1 PE=3 SV=2	CH10_BOVIN	10 931,8	1	5	6	12	0.000563	0.578	VLQATVVAVGSGSKGKGGEIQPVSVK	K	V	0.935	2.47	0.371	2 495,4194
EC_212270_T33Vspike_8_B	10 kDa heat shock protein, mitochondrial OS=Bos taurus GN=HSPE1 PE=3 SV=2	CH10_BOVIN	10 931,8	1	5	5	9	0.000431	0.549	DGDILGKYVD	R	-	0.867	2.02	0.359	1 094,5367
EC_212270_T33Vspike_8_B	10 kDa heat shock protein, mitochondrial OS=Bos taurus GN=HSPE1 PE=3 SV=2	CH10_BOVIN	10 931,8	1	5	5	9	0.000431	0.549	GGIMLPEKSQGKVLQATVVAVGSGSK	K	G	0.997	3.81	0.467	2 541,4072
EC_212270_T33Vspike_8_B	10 kDa heat shock protein, mitochondrial OS=Bos taurus GN=HSPE1 PE=3 SV=2	CH10_BOVIN	10 931,8	1	5	5	9	0.000431	0.549	GKGGEIQPVSVK	K	V	0.935	2.83	0.384	1 198,6792
EC_212270_T33Vspike_8_B	10 kDa heat shock protein, mitochondrial OS=Bos taurus GN=HSPE1 PE=3 SV=2	CH10_BOVIN	10 931,8	1	5	5	9	0.000431	0.549	SAAETVTKGGIMLPEK	R	S	0.997	2.96	0.129	1 631,8675
EC_212270_T33Vspike_8_B	10 kDa heat shock protein, mitochondrial OS=Bos taurus GN=HSPE1 PE=3 SV=2	CH10_BOVIN	10 931,8	1	5	5	9	0.000431	0.549	SAAETVTKGGIMLPEKSQGK	R	V	0.997	3.57	0.302	2 032,0746
EC_212270_T33Vspike_8_B	10 kDa heat shock protein, mitochondrial OS=Bos taurus GN=HSPE1 PE=3 SV=2	CH10_BOVIN	10 931,8	1	5	5	9	0.000431	0.549	VLQATVVAVGSGSK	K	G	0.997	4.85	0.638	1 315,7580
EC_212270_T33Vspike_8_B	10 kDa heat shock protein, mitochondrial OS=Bos taurus GN=HSPE1 PE=3 SV=2	CH10_BOVIN	10 931,8	1	5	5	9	0.000431	0.549	VLQATVVAVGSGSKGK	K	G	0.888	2.07	0.378	1 500,8745
EC_212270_T33Vspike_9_A	10 kDa heat shock protein, mitochondrial OS=Bos taurus GN=HSPE1 PE=3 SV=2	CH10_BOVIN	10 931,8	1	6	6	8	0.000388	0.549	DGDILGKYVD	R	-	0.95	2.2	0.375	1 094,5367
EC_212270_T33Vspike_9_A	10 kDa heat shock protein, mitochondrial OS=Bos taurus GN=HSPE1 PE=3 SV=2	CH10_BOVIN	10 931,8	1	6	6	8	0.000388	0.549	SAAETVTKGGIMLPEK	R	S	0.997	4.09	0.358	1 631,8675
EC_212270_T33Vspike_9_A	10 kDa heat shock protein, mitochondrial OS=Bos taurus GN=HSPE1 PE=3 SV=2	CH10_BOVIN	10 931,8	1	6	6	8	0.000388	0.549	SAAETVTKGGIMLPEKSQGK	R	V	0.997	3.86	0.348	2 032,0746
EC_212270_T33Vspike_9_A	10 kDa heat shock protein, mitochondrial OS=Bos taurus GN=HSPE1 PE=3 SV=2	CH10_BOVIN	10 931,8	1	6	6	8	0.000388	0.549	VLQATVVAVGSGSK	K	G	0.997	5.22	0.667	1 315,7580
EC_212270_T33Vspike_9_A	10 kDa heat shock protein, mitochondrial OS=Bos taurus GN=HSPE1 PE=3 SV=2	CH10_BOVIN	10 931,8	1	6	6	8	0.000388	0.549	VLQATVVAVGSGSKGK	K	G	0.973	2.41	0.53	1 500,8745
EC_212270_T33Vspike_9_A	10 kDa heat shock protein, mitochondrial OS=Bos taurus GN=HSPE1 PE=3 SV=2	CH10_BOVIN	10 931,8	1	6	6	8	0.000388	0.549	VLQATVVAVGSGSKGKGGEIQPVSVK	K	V	0.983	2.53	0.384	2 495,4194
EC_212270_T33Vspike_9_B	10 kDa heat shock protein, mitochondrial OS=Bos taurus GN=HSPE1 PE=3 SV=2	CH10_BOVIN	10 931,8	1	5	5	6	0.000309	0.451	DGDILGKYVD	R	-	0.918	1.7	0.344	1 094,5367
EC_212270_T33Vspike_9_B	10 kDa heat shock protein, mitochondrial OS=Bos taurus GN=HSPE1 PE=3 SV=2	CH10_BOVIN	10 931,8	1	5	5	6	0.000309	0.451	SAAETVTKGGIMLPEK	R	S	0.997	2.56	0.137	1 631,8675
EC_212270_T33Vspike_9_B	10 kDa heat shock protein, mitochondrial OS=Bos taurus GN=HSPE1 PE=3 SV=2	CH10_BOVIN	10 931,8	1	5	5	6	0.000309	0.451	SAAETVTKGGIMLPEKSQGK	R	V	0.997	3.93	0.252	2 032,0746
EC_212270_T33Vspike_9_B	10 kDa heat shock protein, mitochondrial OS=Bos taurus GN=HSPE1 PE=3 SV=2	CH10_BOVIN	10 931,8	1	5	5	6	0.000309	0.451	VLQATVVAVGSGSK	K	G	0.997	5.27	0.68	1 315,7580
EC_212270_T33Vspike_9_B	10 kDa heat shock protein, mitochondrial OS=Bos taurus GN=HSPE1 PE=3 SV=2	CH10_BOVIN	10 931,8	1	5	5	6	0.000309	0.451	VLQATVVAVGSGSKGK	K	G	0.997	2.74	0.45	1 500,8745
EC_212270_T33Vspike_10_A	10 kDa heat shock protein, mitochondrial OS=Bos taurus GN=HSPE1 PE=3 SV=2	CH10_BOVIN	10 931,8	1	6	7	9	0.000488	0.451	GKGGEIQPVSVK	K	V	0.993	3.04	0.391	1 198,6792
EC_212270_T33Vspike_10_A	10 kDa heat shock protein, mitochondrial OS=Bos taurus GN=HSPE1 PE=3 SV=2	CH10_BOVIN	10 931,8	1	6	7	9	0.000488	0.451	SAAETVTKGGIMLPEK	R	S	0.997	3.46	0.283	1 631,8675
EC_212270_T33Vspike_10_A	10 kDa heat shock protein, mitochondrial OS=Bos taurus GN=HSPE1 PE=3 SV=2	CH10_BOVIN	10 931,8	1	6	7	9	0.000488	0.451	SAAETVTKGGIMLPEKSQGK	R	V	0.971	2.89	0.318	2 032,0746
EC_212270_T33Vspike_10_A	10 kDa heat shock protein, mitochondrial OS=Bos taurus GN=HSPE1 PE=3 SV=2	CH10_BOVIN	10 931,8	1	6	7	9	0.000488	0.451	VLQATVVAVGSGSK	K	G	0.997	5.04	0.641	1 315,7580
EC_212270_T33Vspike_10_A	10 kDa heat shock protein, mitochondrial OS=Bos taurus GN=HSPE1 PE=3 SV=2	CH10_BOVIN	10 931,8	1	6	7	9	0.000488	0.451	VLQATVVAVGSGSKGK	K	G	0.924	2.34	0.449	1 500,8745
EC_212270_T33Vspike_10_A	10 kDa heat shock protein, mitochondrial OS=Bos taurus GN=HSPE1 PE=3 SV=2	CH10_BOVIN	10 931,8	1	6	7	9	0.000488	0.451	VLQATVVAVGSGSKGKGGEIQPVSVK	K	V	0.919	2.63	0.532	2 495,4194
EC_212270_T33Vspike_10_B	10 kDa heat shock protein, mitochondrial OS=Bos taurus GN=HSPE1 PE=3 SV=2	CH10_BOVIN	10 931,8	1	5	5	7	0.000371	0.569	FLPLFDRVLVER	K	S	0.803	2.36	0.18	1 503,8683
EC_212270_T33Vspike_10_B	10 kDa heat shock protein, mitochondrial OS=Bos taurus GN=HSPE1 PE=3 SV=2	CH10_BOVIN	10 931,8	1	5	5	7	0.000371	0.569	SAAETVTKGGIMLPEK	R	S	0.997	3.2	0.222	1 631,8675
EC_212270_T33Vspike_10_B	10 kDa heat shock protein, mitochondrial OS=Bos taurus GN=HSPE1 PE=3 SV=2	CH10_BOVIN	10 931,8	1	5	5	7	0.000371	0.569	SAAETVTKGGIMLPEKSQGK	R	V	0.997	4.57	0.359	2 032,0746
EC_212270_T33Vspike_10_B	10 kDa heat shock protein, mitochondrial OS=Bos taurus GN=HSPE1 PE=3 SV=2	CH10_BOVIN	10 931,8	1	5	5	7	0.000371	0.569	VLQATVVAVGSGSK	K	G	0.997	5.22	0.623	1 315,7580
EC_212270_T33Vspike_10_B	10 kDa heat shock protein, mitochondrial OS=Bos taurus GN=HSPE1 PE=3 SV=2	CH10_BOVIN	10 931,8	1	5	5	7	0.000371	0.569	VLQATVVAVGSGSKGKGGEIQPVSVK	K	V	0.807	2.71	0.412	2 495,4194
EC_212270_T33Vspike_11_A	10 kDa heat shock protein, mitochondrial OS=Bos taurus GN=HSPE1 PE=3 SV=2	CH10_BOVIN	10 931,8	1	2	2	5	0.000231	0.353	SAAETVTKGGIMLPEK	R	S	0.997	3.17	0.256	1 631,8675
EC_212270_T33Vspike_11_A	10 kDa heat shock protein, mitochondrial OS=Bos taurus GN=HSPE1 PE=3 SV=2	CH10_BOVIN	10 931,8	1	2	2	5	0.000231	0.353	SAAETVTKGGIMLPEKSQGK	R	V	0.997	4.32	0.329	2 032,0746
EC_212270_T33Vspike_11_A	10 kDa heat shock protein, mitochondrial OS=Bos taurus GN=HSPE1 PE=3 SV=2	CH10_BOVIN	10 931,8	1	2	2	5	0.000231	0.353	VLQATVVAVGSGSK	K	G	0.997	4.19	0.68	1 315,7580
EC_212270_T33Vspike_11_A	10 kDa heat shock protein, mitochondrial OS=Bos taurus GN=HSPE1 PE=3 SV=2	CH10_BOVIN	10 931,8	1	2	2	5	0.000231	0.353	VLQATVVAVGSGSKGK	K	G	0.997	3.18	0.507	1 500,8745
EC_212270_T33Vspike_11_B	10 kDa heat shock protein, mitochondrial OS=Bos taurus GN=HSPE1 PE=3 SV=2	CH10_BOVIN	10 931,8	1	2	2	3	0.00014	0.353	SAAETVTKGGIMLPEKSQGK	R	V	0.997	3.57	0.3	2 032,0746
EC_212270_T33Vspike_11_B	10 kDa heat shock protein, mitochondrial OS=Bos taurus GN=HSPE1 PE=3 SV=2	CH10_BOVIN	10 931,8	1	2	2	3	0.00014	0.353	VLQATVVAVGSGSK	K	G	0.997	5.23	0.641	1 315,7580
EC_212270_T33Vspike_11_B	10 kDa heat shock protein, mitochondrial OS=Bos taurus GN=HSPE1 PE=3 SV=2	CH10_BOVIN	10 931,8	1	2	2	3	0.00014	0.353	VLQATVVAVGSGSKGK	K	G	0.997	3.49	0.53	1 500,8745
EC_212270_T33Vspike_12_A	10 kDa heat shock protein, mitochondrial OS=Bos taurus GN=HSPE1 PE=3 SV=2	CH10_BOVIN	10 931,8	1	3	4	15	0.00075	0.578	FLPLFDR	K	V	0.518	1.65	0.0157	907.504
EC_212270_T33Vspike_12_A	10 kDa heat shock protein, mitochondrial OS=Bos taurus GN=HSPE1 PE=3 SV=2	CH10_BOVIN	10 931,8	1	3	4	15	0.00075	0.578	FLPLFDRVLVER	K	S	0.637	1.83	0	1 503,8683
EC_212270_T33Vspike_12_A	10 kDa heat shock protein, mitochondrial OS=Bos taurus GN=HSPE1 PE=3 SV=2	CH10_BOVIN	10 931,8	1	3	4	15	0.00075	0.578	KFLPLFDRVLVER	R	S	0.352	2.52	0.343	1 631,9633
EC_212270_T33Vspike_12_A	10 kDa heat shock protein, mitochondrial OS=Bos taurus GN=HSPE1 PE=3 SV=2	CH10_BOVIN	10 931,8	1	3	4	15	0.00075	0.578	SAAETVTKGGIMLPEK	R	S	0.594	2.42	0	1 631,8675
EC_212270_T33Vspike_12_A	10 kDa heat shock protein, mitochondrial OS=Bos taurus GN=HSPE1 PE=3 SV=2	CH10_BOVIN	10 931,8	1	3	4	15	0.00075	0.578	SAAETVTKGGIMLPEKSQGK	R	V	0.997	4.53	0.317	2 032,0746
EC_212270_T33Vspike_12_A	10 kDa heat shock protein, mitochondrial OS=Bos taurus GN=HSPE1 PE=3 SV=2	CH10_BOVIN	10 931,8	1	3	4	15	0.00075	0.578	VLQATVVAVGSGSK	K	G	0.997	4.94	0.657	1 315,7580
EC_212270_T33Vspike_12_A	10 kDa heat shock protein, mitochondrial OS=Bos taurus GN=HSPE1 PE=3 SV=2	CH10_BOVIN	10 931,8	1	3	4	15	0.00075	0.578	VLQATVVAVGSGSKGK	K	G	0.289	2.47	0.412	1 500,8745
EC_212270_T33Vspike_12_A	10 kDa heat shock protein, mitochondrial OS=Bos taurus GN=HSPE1 PE=3 SV=2	CH10_BOVIN	10 931,8	1	3	4	15	0.00075	0.578	VLQATVVAVGSGSKGKGGEIQPVSVK	K	V	0.425	1.75	0	2 495,4194
EC_212270_T33Vspike_12_B	10 kDa heat shock protein, mitochondrial OS=Bos taurus GN=HSPE1 PE=3 SV=2	CH10_BOVIN	10 931,8	1	5	6	21	0.00112	0.578	FLPLFDRVLVER	K	S	0.747	2.27	0.17	1 503,8683
EC_212270_T33Vspike_12_B	10 kDa heat shock protein, mitochondrial OS=Bos taurus GN=HSPE1 PE=3 SV=2	CH10_BOVIN	10 931,8	1	5	6	21	0.00112	0.578	GGEIQPVSVK	K	V	0.767	2.59	0.146	1 013,5627
EC_212270_T33Vspike_12_B	10 kDa heat shock protein, mitochondrial OS=Bos taurus GN=HSPE1 PE=3 SV=2	CH10_BOVIN	10 931,8	1	5	6	21	0.00112	0.578	GGIMLPEKSQGKVLQATVVAVGSGSK	K	G	0.715	2.58	0.117	2 541,4072
EC_212270_T33Vspike_12_B	10 kDa heat shock protein, mitochondrial OS=Bos taurus GN=HSPE1 PE=3 SV=2	CH10_BOVIN	10 931,8	1	5	6	21	0.00112	0.578	KFLPLFDRVLVER	R	S	0.766	2.28	0.232	1 631,9633
EC_212270_T33Vspike_12_B	10 kDa heat shock protein, mitochondrial OS=Bos taurus GN=HSPE1 PE=3 SV=2	CH10_BOVIN	10 931,8	1	5	6	21	0.00112	0.578	SAAETVTKGGIMLPEK	R	S	0.847	2.46	0.109	1 631,8675
EC_212270_T33Vspike_12_B	10 kDa heat shock protein, mitochondrial OS=Bos taurus GN=HSPE1 PE=3 SV=2	CH10_BOVIN	10 931,8	1	5	6	21	0.00112	0.578	SAAETVTKGGIMLPEKSQGK	R	V	0.997	3.24	0.35	2 032,0746
EC_212270_T33Vspike_12_B	10 kDa heat shock protein, mitochondrial OS=Bos taurus GN=HSPE1 PE=3 SV=2	CH10_BOVIN	10 931,8	1	5	6	21	0.00112	0.578	VLQATVVAVGSGSK	K	G	0.997	4.7	0.685	1 315,7580
EC_212270_T33Vspike_12_B	10 kDa heat shock protein, mitochondrial OS=Bos taurus GN=HSPE1 PE=3 SV=2	CH10_BOVIN	10 931,8	1	5	6	21	0.00112	0.578	VLQATVVAVGSGSKGK	K	G	0.758	2.62	0.545	1 500,8745
EC_212270_T33Vspike_12_B	10 kDa heat shock protein, mitochondrial OS=Bos taurus GN=HSPE1 PE=3 SV=2	CH10_BOVIN	10 931,8	1	5	6	21	0.00112	0.578	VLQATVVAVGSGSKGKGGEIQPVSVK	K	V	0.997	3.22	0.581	2 495,4194
EC_212270_T33Vspike_9_B	60 kDa heat shock protein, mitochondrial OS=Gallus gallus GN=HSPD1 PE=1 SV=1	CH60_CHICK	60 973,6	0.989	1	1	26	0.00134	0.168	ALMLQGVDLLADAVAVTMGPK	R	G	0.997	4.99	0.596	2 113,1399
EC_212270_T33Vspike_9_B	60 kDa heat shock protein, mitochondrial OS=Gallus gallus GN=HSPD1 PE=1 SV=1	CH60_CHICK	60 973,6	0.989	1	1	26	0.00134	0.168	ALMLQGVDLLADAVAVTMGPKGR	R	T	0.997	4.29	0.586	2 326,2625
EC_212270_T33Vspike_9_B	60 kDa heat shock protein, mitochondrial OS=Gallus gallus GN=HSPD1 PE=1 SV=1	CH60_CHICK	60 973,6	0.989	1	1	26	0.00134	0.168	LSKPVTTPEEIAQVATISANGDQEIGNIISDAMKK	K	V	0.973	2.99	0.12	3 668,9056
EC_212270_T33Vspike_9_B	60 kDa heat shock protein, mitochondrial OS=Gallus gallus GN=HSPD1 PE=1 SV=1	CH60_CHICK	60 973,6	0.989	1	1	26	0.00134	0.168	NAGVEGSLIVEK	K	I	0.997	3.66	0.411	1 215,6580
EC_212270_T33Vspike_9_B	60 kDa heat shock protein, mitochondrial OS=Gallus gallus GN=HSPD1 PE=1 SV=1	CH60_CHICK	60 973,6	0.989	1	1	26	0.00134	0.168	TLKIPAMTIAK	R	N	0.997	3.41	0.435	1 186,7230
EC_212270_T33Vspike_9_B	60 kDa heat shock protein, mitochondrial OS=Gallus gallus GN=HSPD1 PE=1 SV=1	CH60_CHICK	60 973,6	0.989	1	1	26	0.00134	0.168	TVIIEQSWGSPK	R	V	0.997	3.83	0.456	1 344,7159
EC_212270_T33Vspike_9_B	60 kDa heat shock protein, mitochondrial OS=Gallus gallus GN=HSPD1 PE=1 SV=1	CH60_CHICK	60 973,6	0.989	1	1	26	0.00134	0.168	TVIIEQSWGSPKVTK	R	D	0.952	2.24	0.447	1 672,9270
EC_212270_T33Vspike_2_A	60 kDa heat shock protein, mitochondrial OS=Cricetulus griseus GN=HSPD1 PE=2 SV=1	CH60_CRIGR	60 989,9	1	0	0	39	0.00163	0.34	AAVEEGIVLGGGCALLR	R	C	0.997	5.26	0.448	1 627,8838
EC_212270_T33Vspike_2_A	60 kDa heat shock protein, mitochondrial OS=Cricetulus griseus GN=HSPD1 PE=2 SV=1	CH60_CRIGR	60 989,9	1	0	0	39	0.00163	0.34	ALMLQGVDLLADAVAVTMGPK	R	G	0.997	3.68	0.503	2 129,1349
EC_212270_T33Vspike_2_A	60 kDa heat shock protein, mitochondrial OS=Cricetulus griseus GN=HSPD1 PE=2 SV=1	CH60_CRIGR	60 989,9	1	0	0	39	0.00163	0.34	GRTVIIEQSWGSPK	K	V	0.997	3.39	0.443	1 557,8385
EC_212270_T33Vspike_2_A	60 kDa heat shock protein, mitochondrial OS=Cricetulus griseus GN=HSPD1 PE=2 SV=1	CH60_CRIGR	60 989,9	1	0	0	39	0.00163	0.34	GYISPYFINTSK	R	G	0.885	3.13	0.0425	1 389,7049
EC_212270_T33Vspike_2_A	60 kDa heat shock protein, mitochondrial OS=Cricetulus griseus GN=HSPD1 PE=2 SV=1	CH60_CRIGR	60 989,9	1	0	0	39	0.00163	0.34	KGVITVKDGK	R	T	0.768	2.34	0.358	1 044,6414
EC_212270_T33Vspike_2_A	60 kDa heat shock protein, mitochondrial OS=Cricetulus griseus GN=HSPD1 PE=2 SV=1	CH60_CRIGR	60 989,9	1	0	0	39	0.00163	0.34	LSDGVAVLK	K	V	0.864	2.34	0.205	901.535
EC_212270_T33Vspike_2_A	60 kDa heat shock protein, mitochondrial OS=Cricetulus griseus GN=HSPD1 PE=2 SV=1	CH60_CRIGR	60 989,9	1	0	0	39	0.00163	0.34	LVQDVANNTNEEAGDGTTTATVLAR	K	S	0.997	4.44	0.47	2 560,2487
EC_212270_T33Vspike_2_A	60 kDa heat shock protein, mitochondrial OS=Cricetulus griseus GN=HSPD1 PE=2 SV=1	CH60_CRIGR	60 989,9	1	0	0	39	0.00163	0.34	NAGVEGSLIVEK	K	I	0.997	3.65	0.4	1 215,6580
EC_212270_T33Vspike_2_A	60 kDa heat shock protein, mitochondrial OS=Cricetulus griseus GN=HSPD1 PE=2 SV=1	CH60_CRIGR	60 989,9	1	0	0	39	0.00163	0.34	RGVMLAVDAVIAELKK	R	Q	0.948	2.69	0.317	1 713,0093
EC_212270_T33Vspike_2_A	60 kDa heat shock protein, mitochondrial OS=Cricetulus griseus GN=HSPD1 PE=2 SV=1	CH60_CRIGR	60 989,9	1	0	0	39	0.00163	0.34	SIAKEGFEKISK	R	G	0.997	3.41	0.306	1 336,7472
EC_212270_T33Vspike_2_A	60 kDa heat shock protein, mitochondrial OS=Cricetulus griseus GN=HSPD1 PE=2 SV=1	CH60_CRIGR	60 989,9	1	0	0	39	0.00163	0.34	TLNDELEIIEGMK	K	F	0.997	3.83	0.533	1 504,7566
EC_212270_T33Vspike_2_A	60 kDa heat shock protein, mitochondrial OS=Cricetulus griseus GN=HSPD1 PE=2 SV=1	CH60_CRIGR	60 989,9	1	0	0	39	0.00163	0.34	TVIIEQSWGSPK	R	V	0.997	3.81	0.411	1 344,7159
EC_212270_T33Vspike_2_A	60 kDa heat shock protein, mitochondrial OS=Cricetulus griseus GN=HSPD1 PE=2 SV=1	CH60_CRIGR	60 989,9	1	0	0	39	0.00163	0.34	TVIIEQSWGSPKVTK	R	D	0.997	3.77	0.466	1 672,9270
EC_212270_T33Vspike_2_A	60 kDa heat shock protein, mitochondrial OS=Cricetulus griseus GN=HSPD1 PE=2 SV=1	CH60_CRIGR	60 989,9	1	0	0	39	0.00163	0.34	TVIIEQSWGSPKVTKDGVTVAK	R	A	0.997	3.57	0.526	2 343,2921
EC_212270_T33Vspike_2_A	60 kDa heat shock protein, mitochondrial OS=Cricetulus griseus GN=HSPD1 PE=2 SV=1	CH60_CRIGR	60 989,9	1	0	0	39	0.00163	0.34	VGGTSDVEVNEKKDR	K	V	0.829	3.03	0.145	1 632,8189
EC_212270_T33Vspike_2_A	60 kDa heat shock protein, mitochondrial OS=Cricetulus griseus GN=HSPD1 PE=2 SV=1	CH60_CRIGR	60 989,9	1	0	0	39	0.00163	0.34	VTDALNATR	R	A	0.884	2.94	0.135	960.511
EC_212270_T33Vspike_2_A	60 kDa heat shock protein, mitochondrial OS=Cricetulus griseus GN=HSPD1 PE=2 SV=1	CH60_CRIGR	60 989,9	1	0	0	39	0.00163	0.34	VTDALNATRAAVEEGIVLGGGCALLR	R	C	0.851	2.82	0.175	2 626,3984
EC_212270_T33Vspike_2_A	60 kDa heat shock protein, mitochondrial OS=Cricetulus griseus GN=HSPD1 PE=2 SV=1	CH60_CRIGR	60 989,9	1	0	0	39	0.00163	0.34	VTKDGVTVAK	K	A	0.944	2.66	0.322	1 017,5940
EC_212270_T33Vspike_2_B	60 kDa heat shock protein, mitochondrial OS=Cricetulus griseus GN=HSPD1 PE=2 SV=1	CH60_CRIGR	60 989,9	0.999	0	0	30	0.00131	0.265	AAVEEGIVLGGGCALLR	R	C	0.997	5.29	0.511	1 627,8838
EC_212270_T33Vspike_2_B	60 kDa heat shock protein, mitochondrial OS=Cricetulus griseus GN=HSPD1 PE=2 SV=1	CH60_CRIGR	60 989,9	0.999	0	0	30	0.00131	0.265	ALMLQGVDLLADAVAVTMGPK	R	G	0.997	4.23	0.566	2 129,1349
EC_212270_T33Vspike_2_B	60 kDa heat shock protein, mitochondrial OS=Cricetulus griseus GN=HSPD1 PE=2 SV=1	CH60_CRIGR	60 989,9	0.999	0	0	30	0.00131	0.265	GRTVIIEQSWGSPK	K	V	0.843	2.54	0.191	1 557,8385
EC_212270_T33Vspike_2_B	60 kDa heat shock protein, mitochondrial OS=Cricetulus griseus GN=HSPD1 PE=2 SV=1	CH60_CRIGR	60 989,9	0.999	0	0	30	0.00131	0.265	GRTVIIEQSWGSPKVTK	K	D	0.908	3.08	0.278	1 886,0496
EC_212270_T33Vspike_2_B	60 kDa heat shock protein, mitochondrial OS=Cricetulus griseus GN=HSPD1 PE=2 SV=1	CH60_CRIGR	60 989,9	0.999	0	0	30	0.00131	0.265	GYISPYFINTSK	R	G	0.956	3.08	0.023	1 389,7049
EC_212270_T33Vspike_2_B	60 kDa heat shock protein, mitochondrial OS=Cricetulus griseus GN=HSPD1 PE=2 SV=1	CH60_CRIGR	60 989,9	0.999	0	0	30	0.00131	0.265	LVQDVANNTNEEAGDGTTTATVLAR	K	S	0.997	4.18	0.55	2 560,2487
EC_212270_T33Vspike_2_B	60 kDa heat shock protein, mitochondrial OS=Cricetulus griseus GN=HSPD1 PE=2 SV=1	CH60_CRIGR	60 989,9	0.999	0	0	30	0.00131	0.265	NAGVEGSLIVEK	K	I	0.997	3.4	0.349	1 215,6580
EC_212270_T33Vspike_2_B	60 kDa heat shock protein, mitochondrial OS=Cricetulus griseus GN=HSPD1 PE=2 SV=1	CH60_CRIGR	60 989,9	0.999	0	0	30	0.00131	0.265	RGVMLAVDAVIAELKK	R	Q	0.997	3.25	0.477	1 713,0093
EC_212270_T33Vspike_2_B	60 kDa heat shock protein, mitochondrial OS=Cricetulus griseus GN=HSPD1 PE=2 SV=1	CH60_CRIGR	60 989,9	0.999	0	0	30	0.00131	0.265	SIAKEGFEKISK	R	G	0.997	3.52	0.303	1 336,7472
EC_212270_T33Vspike_2_B	60 kDa heat shock protein, mitochondrial OS=Cricetulus griseus GN=HSPD1 PE=2 SV=1	CH60_CRIGR	60 989,9	0.999	0	0	30	0.00131	0.265	TLNDELEIIEGMK	K	F	0.997	4.29	0.486	1 504,7566
EC_212270_T33Vspike_2_B	60 kDa heat shock protein, mitochondrial OS=Cricetulus griseus GN=HSPD1 PE=2 SV=1	CH60_CRIGR	60 989,9	0.999	0	0	30	0.00131	0.265	TVIIEQSWGSPK	R	V	0.997	3.6	0.369	1 344,7159
EC_212270_T33Vspike_2_B	60 kDa heat shock protein, mitochondrial OS=Cricetulus griseus GN=HSPD1 PE=2 SV=1	CH60_CRIGR	60 989,9	0.999	0	0	30	0.00131	0.265	TVIIEQSWGSPKVTK	R	D	0.997	3.94	0.406	1 672,9270
EC_212270_T33Vspike_2_B	60 kDa heat shock protein, mitochondrial OS=Cricetulus griseus GN=HSPD1 PE=2 SV=1	CH60_CRIGR	60 989,9	0.999	0	0	30	0.00131	0.265	TVIIEQSWGSPKVTKDGVTVAK	R	A	0.933	2.72	0.258	2 343,2921
EC_212270_T33Vspike_3_A	60 kDa heat shock protein, mitochondrial OS=Cricetulus griseus GN=HSPD1 PE=2 SV=1	CH60_CRIGR	60 989,9	0.985	1	1	72	0.00362	0.394	AAVEEGIVLGGGCALLR	R	C	0.997	4.13	0.538	1 684,9053
EC_212270_T33Vspike_3_A	60 kDa heat shock protein, mitochondrial OS=Cricetulus griseus GN=HSPD1 PE=2 SV=1	CH60_CRIGR	60 989,9	0.985	1	1	72	0.00362	0.394	ALMLQGVDLLADAVAVTMGPK	R	G	0.997	4.8	0.469	2 113,1399
EC_212270_T33Vspike_3_A	60 kDa heat shock protein, mitochondrial OS=Cricetulus griseus GN=HSPD1 PE=2 SV=1	CH60_CRIGR	60 989,9	0.985	1	1	72	0.00362	0.394	ALMLQGVDLLADAVAVTMGPKGR	R	T	0.997	4.2	0.537	2 326,2625
EC_212270_T33Vspike_3_A	60 kDa heat shock protein, mitochondrial OS=Cricetulus griseus GN=HSPD1 PE=2 SV=1	CH60_CRIGR	60 989,9	0.985	1	1	72	0.00362	0.394	GRTVIIEQSWGSPK	K	V	0.937	2.68	0.326	1 557,8385
EC_212270_T33Vspike_3_A	60 kDa heat shock protein, mitochondrial OS=Cricetulus griseus GN=HSPD1 PE=2 SV=1	CH60_CRIGR	60 989,9	0.985	1	1	72	0.00362	0.394	GVMLAVDAVIAELK	R	K	0.776	2.86	0.142	1 428,8132
EC_212270_T33Vspike_3_A	60 kDa heat shock protein, mitochondrial OS=Cricetulus griseus GN=HSPD1 PE=2 SV=1	CH60_CRIGR	60 989,9	0.985	1	1	72	0.00362	0.394	GVMLAVDAVIAELKK	R	Q	0.997	4.52	0.436	1 556,9082
EC_212270_T33Vspike_3_A	60 kDa heat shock protein, mitochondrial OS=Cricetulus griseus GN=HSPD1 PE=2 SV=1	CH60_CRIGR	60 989,9	0.985	1	1	72	0.00362	0.394	GYISPYFINTSK	R	G	0.278	2.33	0.0318	1 389,7049
EC_212270_T33Vspike_3_A	60 kDa heat shock protein, mitochondrial OS=Cricetulus griseus GN=HSPD1 PE=2 SV=1	CH60_CRIGR	60 989,9	0.985	1	1	72	0.00362	0.394	GYISPYFINTSKGQK	R	C	0.217	1.25	0.00944	1 702,8800
EC_212270_T33Vspike_3_A	60 kDa heat shock protein, mitochondrial OS=Cricetulus griseus GN=HSPD1 PE=2 SV=1	CH60_CRIGR	60 989,9	0.985	1	1	72	0.00362	0.394	KPLVIIAEDVDGEALSTLVLNR	R	L	0.177	2.25	0	2 365,3340
EC_212270_T33Vspike_3_A	60 kDa heat shock protein, mitochondrial OS=Cricetulus griseus GN=HSPD1 PE=2 SV=1	CH60_CRIGR	60 989,9	0.985	1	1	72	0.00362	0.394	LSDGVAVLK	K	V	0.408	2.15	0.151	901.535
EC_212270_T33Vspike_3_A	60 kDa heat shock protein, mitochondrial OS=Cricetulus griseus GN=HSPD1 PE=2 SV=1	CH60_CRIGR	60 989,9	0.985	1	1	72	0.00362	0.394	LVQDVANNTNEEAGDGTTTATVLAR	K	S	0.629	2.34	0.194	2 560,2487
EC_212270_T33Vspike_3_A	60 kDa heat shock protein, mitochondrial OS=Cricetulus griseus GN=HSPD1 PE=2 SV=1	CH60_CRIGR	60 989,9	0.985	1	1	72	0.00362	0.394	NIGAKLVQDVANNTNEEAGDGTTTATVLAR	K	S	0.903	2.7	0.303	3 043,5293
EC_212270_T33Vspike_3_A	60 kDa heat shock protein, mitochondrial OS=Cricetulus griseus GN=HSPD1 PE=2 SV=1	CH60_CRIGR	60 989,9	0.985	1	1	72	0.00362	0.394	QSKPVTTPEEIAQVATISANGDKDIGNIISDAMKK	K	V	0.908	3.35	0.263	3 685,8959
EC_212270_T33Vspike_3_A	60 kDa heat shock protein, mitochondrial OS=Cricetulus griseus GN=HSPD1 PE=2 SV=1	CH60_CRIGR	60 989,9	0.985	1	1	72	0.00362	0.394	RGVMLAVDAVIAELKK	R	Q	0.997	5.07	0.529	1 713,0093
EC_212270_T33Vspike_3_A	60 kDa heat shock protein, mitochondrial OS=Cricetulus griseus GN=HSPD1 PE=2 SV=1	CH60_CRIGR	60 989,9	0.985	1	1	72	0.00362	0.394	SIAKEGFEKISK	R	G	0.997	3.62	0.261	1 336,7472
EC_212270_T33Vspike_3_A	60 kDa heat shock protein, mitochondrial OS=Cricetulus griseus GN=HSPD1 PE=2 SV=1	CH60_CRIGR	60 989,9	0.985	1	1	72	0.00362	0.394	TLNDELEIIEGMKFDR	K	G	0.286	1.83	0.0471	1 922,9531
EC_212270_T33Vspike_3_A	60 kDa heat shock protein, mitochondrial OS=Cricetulus griseus GN=HSPD1 PE=2 SV=1	CH60_CRIGR	60 989,9	0.985	1	1	72	0.00362	0.394	TVIIEQSWGSPK	R	V	0.997	3.61	0.341	1 344,7159
EC_212270_T33Vspike_3_A	60 kDa heat shock protein, mitochondrial OS=Cricetulus griseus GN=HSPD1 PE=2 SV=1	CH60_CRIGR	60 989,9	0.985	1	1	72	0.00362	0.394	TVIIEQSWGSPKVTK	R	D	0.937	2.79	0.336	1 672,9270
EC_212270_T33Vspike_3_A	60 kDa heat shock protein, mitochondrial OS=Cricetulus griseus GN=HSPD1 PE=2 SV=1	CH60_CRIGR	60 989,9	0.985	1	1	72	0.00362	0.394	TVIIEQSWGSPKVTKDGVTVAK	R	A	0.291	1.82	0.0504	2 343,2921
EC_212270_T33Vspike_3_A	60 kDa heat shock protein, mitochondrial OS=Cricetulus griseus GN=HSPD1 PE=2 SV=1	CH60_CRIGR	60 989,9	0.985	1	1	72	0.00362	0.394	VTDALNATR	R	A	0.334	1.9	0.117	960.511
EC_212270_T33Vspike_3_A	60 kDa heat shock protein, mitochondrial OS=Cricetulus griseus GN=HSPD1 PE=2 SV=1	CH60_CRIGR	60 989,9	0.985	1	1	72	0.00362	0.394	VTDALNATRAAVEEGIVLGGGCALLR	R	C	0.997	3.93	0.294	2 626,3984
EC_212270_T33Vspike_3_A	60 kDa heat shock protein, mitochondrial OS=Cricetulus griseus GN=HSPD1 PE=2 SV=1	CH60_CRIGR	60 989,9	0.985	1	1	72	0.00362	0.394	VTKDGVTVAK	K	A	0.765	2.48	0.252	1 017,5940
EC_212270_T33Vspike_4_B	60 kDa heat shock protein, mitochondrial OS=Cricetulus griseus GN=HSPD1 PE=2 SV=1	CH60_CRIGR	60 989,9	1	1	1	32	0.00127	0.265	AAVEEGIVLGGGCALLR	R	C	0.997	4.17	0.395	1 684,9053
EC_212270_T33Vspike_4_B	60 kDa heat shock protein, mitochondrial OS=Cricetulus griseus GN=HSPD1 PE=2 SV=1	CH60_CRIGR	60 989,9	1	1	1	32	0.00127	0.265	ALMLQGVDLLADAVAVTMGPK	R	G	0.997	4.99	0.507	2 129,1349
EC_212270_T33Vspike_4_B	60 kDa heat shock protein, mitochondrial OS=Cricetulus griseus GN=HSPD1 PE=2 SV=1	CH60_CRIGR	60 989,9	1	1	1	32	0.00127	0.265	ALMLQGVDLLADAVAVTMGPKGR	R	T	0.997	4.04	0.508	2 326,2625
EC_212270_T33Vspike_4_B	60 kDa heat shock protein, mitochondrial OS=Cricetulus griseus GN=HSPD1 PE=2 SV=1	CH60_CRIGR	60 989,9	1	1	1	32	0.00127	0.265	GVMLAVDAVIAELKK	R	Q	0.997	4.73	0.434	1 556,9082
EC_212270_T33Vspike_4_B	60 kDa heat shock protein, mitochondrial OS=Cricetulus griseus GN=HSPD1 PE=2 SV=1	CH60_CRIGR	60 989,9	1	1	1	32	0.00127	0.265	LVQDVANNTNEEAGDGTTTATVLAR	K	S	0.975	3.17	0.381	2 560,2487
EC_212270_T33Vspike_4_B	60 kDa heat shock protein, mitochondrial OS=Cricetulus griseus GN=HSPD1 PE=2 SV=1	CH60_CRIGR	60 989,9	1	1	1	32	0.00127	0.265	NAGVEGSLIVEK	K	I	0.979	3.27	0.272	1 215,6580
EC_212270_T33Vspike_4_B	60 kDa heat shock protein, mitochondrial OS=Cricetulus griseus GN=HSPD1 PE=2 SV=1	CH60_CRIGR	60 989,9	1	1	1	32	0.00127	0.265	QSKPVTTPEEIAQVATISANGDKDIGNIISDAMKK	K	V	0.997	4.07	0.381	3 685,8959
EC_212270_T33Vspike_4_B	60 kDa heat shock protein, mitochondrial OS=Cricetulus griseus GN=HSPD1 PE=2 SV=1	CH60_CRIGR	60 989,9	1	1	1	32	0.00127	0.265	RGVMLAVDAVIAELKK	R	Q	0.997	4.87	0.549	1 713,0093
EC_212270_T33Vspike_4_B	60 kDa heat shock protein, mitochondrial OS=Cricetulus griseus GN=HSPD1 PE=2 SV=1	CH60_CRIGR	60 989,9	1	1	1	32	0.00127	0.265	TVIIEQSWGSPK	R	V	0.997	3.88	0.496	1 344,7159
EC_212270_T33Vspike_4_B	60 kDa heat shock protein, mitochondrial OS=Cricetulus griseus GN=HSPD1 PE=2 SV=1	CH60_CRIGR	60 989,9	1	1	1	32	0.00127	0.265	TVIIEQSWGSPKVTK	R	D	0.991	3.62	0.384	1 672,9270
EC_212270_T33Vspike_4_B	60 kDa heat shock protein, mitochondrial OS=Cricetulus griseus GN=HSPD1 PE=2 SV=1	CH60_CRIGR	60 989,9	1	1	1	32	0.00127	0.265	VTDALNATRAAVEEGIVLGGGCALLR	R	C	0.997	3.64	0.354	2 626,3984
EC_212270_T33Vspike_5_B	60 kDa heat shock protein, mitochondrial OS=Cricetulus griseus GN=HSPD1 PE=2 SV=1	CH60_CRIGR	60 989,9	0.997	1	1	34	0.00173	0.286	AAVEEGIVLGGGCALLR	R	C	0.997	4.69	0.422	1 627,8838
EC_212270_T33Vspike_5_B	60 kDa heat shock protein, mitochondrial OS=Cricetulus griseus GN=HSPD1 PE=2 SV=1	CH60_CRIGR	60 989,9	0.997	1	1	34	0.00173	0.286	ALMLQGVDLLADAVAVTMGPK	R	G	0.997	4.79	0.531	2 113,1399
EC_212270_T33Vspike_5_B	60 kDa heat shock protein, mitochondrial OS=Cricetulus griseus GN=HSPD1 PE=2 SV=1	CH60_CRIGR	60 989,9	0.997	1	1	34	0.00173	0.286	ALMLQGVDLLADAVAVTMGPKGR	R	T	0.997	3.8	0.451	2 326,2625
EC_212270_T33Vspike_5_B	60 kDa heat shock protein, mitochondrial OS=Cricetulus griseus GN=HSPD1 PE=2 SV=1	CH60_CRIGR	60 989,9	0.997	1	1	34	0.00173	0.286	LVQDVANNTNEEAGDGTTTATVLAR	K	S	0.987	3.39	0.356	2 560,2487
EC_212270_T33Vspike_5_B	60 kDa heat shock protein, mitochondrial OS=Cricetulus griseus GN=HSPD1 PE=2 SV=1	CH60_CRIGR	60 989,9	0.997	1	1	34	0.00173	0.286	NAGVEGSLIVEK	K	I	0.997	3.31	0.35	1 215,6580
EC_212270_T33Vspike_5_B	60 kDa heat shock protein, mitochondrial OS=Cricetulus griseus GN=HSPD1 PE=2 SV=1	CH60_CRIGR	60 989,9	0.997	1	1	34	0.00173	0.286	QSKPVTTPEEIAQVATISANGDKDIGNIISDAMKK	K	V	0.956	3.27	0.317	3 685,8959
EC_212270_T33Vspike_5_B	60 kDa heat shock protein, mitochondrial OS=Cricetulus griseus GN=HSPD1 PE=2 SV=1	CH60_CRIGR	60 989,9	0.997	1	1	34	0.00173	0.286	RGVMLAVDAVIAELKK	R	Q	0.997	5.2	0.517	1 713,0093
EC_212270_T33Vspike_5_B	60 kDa heat shock protein, mitochondrial OS=Cricetulus griseus GN=HSPD1 PE=2 SV=1	CH60_CRIGR	60 989,9	0.997	1	1	34	0.00173	0.286	SIAKEGFEKISK	R	G	0.997	3.48	0.286	1 336,7472
EC_212270_T33Vspike_5_B	60 kDa heat shock protein, mitochondrial OS=Cricetulus griseus GN=HSPD1 PE=2 SV=1	CH60_CRIGR	60 989,9	0.997	1	1	34	0.00173	0.286	TVIIEQSWGSPK	R	V	0.997	3.6	0.382	1 344,7159
EC_212270_T33Vspike_5_B	60 kDa heat shock protein, mitochondrial OS=Cricetulus griseus GN=HSPD1 PE=2 SV=1	CH60_CRIGR	60 989,9	0.997	1	1	34	0.00173	0.286	TVIIEQSWGSPKVTK	R	D	0.997	3.19	0.438	1 672,9270
EC_212270_T33Vspike_5_B	60 kDa heat shock protein, mitochondrial OS=Cricetulus griseus GN=HSPD1 PE=2 SV=1	CH60_CRIGR	60 989,9	0.997	1	1	34	0.00173	0.286	VTDALNATRAAVEEGIVLGGGCALLR	R	C	0.898	2.94	0.248	2 626,3984
EC_212270_T33Vspike_1_A	60 kDa heat shock protein, mitochondrial OS=Homo sapiens GN=HSPD1 PE=1 SV=2	CH60_HUMAN	61 055,7	1	29	44	88	0.00379	0.66	AAVEEGIVLGGGCALLR	R	C	0.997	5.13	0.475	1 627,8838
EC_212270_T33Vspike_1_A	60 kDa heat shock protein, mitochondrial OS=Homo sapiens GN=HSPD1 PE=1 SV=2	CH60_HUMAN	61 055,7	1	29	44	88	0.00379	0.66	ALMLQGVDLLADAVAVTMGPK	R	G	0.997	4.35	0.511	2 129,1349
EC_212270_T33Vspike_1_A	60 kDa heat shock protein, mitochondrial OS=Homo sapiens GN=HSPD1 PE=1 SV=2	CH60_HUMAN	61 055,7	1	29	44	88	0.00379	0.66	ALMLQGVDLLADAVAVTMGPKGR	R	T	0.997	4.83	0.589	2 326,2625
EC_212270_T33Vspike_1_A	60 kDa heat shock protein, mitochondrial OS=Homo sapiens GN=HSPD1 PE=1 SV=2	CH60_HUMAN	61 055,7	1	29	44	88	0.00379	0.66	GIIDPTKVVR	K	T	0.824	2.6	0.181	1 097,6679
EC_212270_T33Vspike_1_A	60 kDa heat shock protein, mitochondrial OS=Homo sapiens GN=HSPD1 PE=1 SV=2	CH60_HUMAN	61 055,7	1	29	44	88	0.00379	0.66	GRTVIIEQSWGSPK	K	V	0.932	2.73	0.26	1 557,8385
EC_212270_T33Vspike_1_A	60 kDa heat shock protein, mitochondrial OS=Homo sapiens GN=HSPD1 PE=1 SV=2	CH60_HUMAN	61 055,7	1	29	44	88	0.00379	0.66	GVMLAVDAVIAELK	R	K	0.995	3.62	0.282	1 428,8132
EC_212270_T33Vspike_1_A	60 kDa heat shock protein, mitochondrial OS=Homo sapiens GN=HSPD1 PE=1 SV=2	CH60_HUMAN	61 055,7	1	29	44	88	0.00379	0.66	GVMLAVDAVIAELKK	R	Q	0.997	4.79	0.467	1 556,9082
EC_212270_T33Vspike_1_A	60 kDa heat shock protein, mitochondrial OS=Homo sapiens GN=HSPD1 PE=1 SV=2	CH60_HUMAN	61 055,7	1	29	44	88	0.00379	0.66	GYISPYFINTSK	R	G	0.786	2.9	0.0189	1 389,7049
EC_212270_T33Vspike_1_A	60 kDa heat shock protein, mitochondrial OS=Homo sapiens GN=HSPD1 PE=1 SV=2	CH60_HUMAN	61 055,7	1	29	44	88	0.00379	0.66	GYISPYFINTSKGQK	R	C	0.963	2.61	0.282	1 702,8800
EC_212270_T33Vspike_1_A	60 kDa heat shock protein, mitochondrial OS=Homo sapiens GN=HSPD1 PE=1 SV=2	CH60_HUMAN	61 055,7	1	29	44	88	0.00379	0.66	IMQSSSEVGYDAMAGDFVNMVEK	K	G	0.997	4.75	0.461	2 508,1092
EC_212270_T33Vspike_1_A	60 kDa heat shock protein, mitochondrial OS=Homo sapiens GN=HSPD1 PE=1 SV=2	CH60_HUMAN	61 055,7	1	29	44	88	0.00379	0.66	IMQSSSEVGYDAMAGDFVNMVEKGIIDPTKVVR	K	T	0.997	4.14	0.459	3 586,7593
EC_212270_T33Vspike_1_A	60 kDa heat shock protein, mitochondrial OS=Homo sapiens GN=HSPD1 PE=1 SV=2	CH60_HUMAN	61 055,7	1	29	44	88	0.00379	0.66	IQEIIEQLDVTTSEYEKEKLNER	R	L	0.963	3.24	0.293	2 807,4312
EC_212270_T33Vspike_1_A	60 kDa heat shock protein, mitochondrial OS=Homo sapiens GN=HSPD1 PE=1 SV=2	CH60_HUMAN	61 055,7	1	29	44	88	0.00379	0.66	ISSIQSIVPALEIANAHRKPLVIIAEDVDGEALSTLVLNRLK	K	V	0.961	3.03	0.473	4 506,5662
EC_212270_T33Vspike_1_A	60 kDa heat shock protein, mitochondrial OS=Homo sapiens GN=HSPD1 PE=1 SV=2	CH60_HUMAN	61 055,7	1	29	44	88	0.00379	0.66	KISSIQSIVPALEIANAHRKPLVIIAEDVDGEALSTLVLNR	K	L	0.938	2.92	0.368	4 393,4821
EC_212270_T33Vspike_1_A	60 kDa heat shock protein, mitochondrial OS=Homo sapiens GN=HSPD1 PE=1 SV=2	CH60_HUMAN	61 055,7	1	29	44	88	0.00379	0.66	LSDGVAVLK	K	V	0.939	2.55	0.125	901.535
EC_212270_T33Vspike_1_A	60 kDa heat shock protein, mitochondrial OS=Homo sapiens GN=HSPD1 PE=1 SV=2	CH60_HUMAN	61 055,7	1	29	44	88	0.00379	0.66	LVQDVANNTNEEAGDGTTTATVLAR	K	S	0.997	4.17	0.378	2 560,2487
EC_212270_T33Vspike_1_A	60 kDa heat shock protein, mitochondrial OS=Homo sapiens GN=HSPD1 PE=1 SV=2	CH60_HUMAN	61 055,7	1	29	44	88	0.00379	0.66	NAGVEGSLIVEK	K	I	0.997	3.92	0.386	1 215,6580
EC_212270_T33Vspike_1_A	60 kDa heat shock protein, mitochondrial OS=Homo sapiens GN=HSPD1 PE=1 SV=2	CH60_HUMAN	61 055,7	1	29	44	88	0.00379	0.66	NAGVEGSLIVEKIMQSSSEVGYDAMAGDFVNMVEK	K	G	0.997	3.83	0.467	3 704,7494
EC_212270_T33Vspike_1_A	60 kDa heat shock protein, mitochondrial OS=Homo sapiens GN=HSPD1 PE=1 SV=2	CH60_HUMAN	61 055,7	1	29	44	88	0.00379	0.66	QSKPVTTPEEIAQVATISANGDKEIGNIISDAMKK	K	V	0.997	4.02	0.377	3 683,9165
EC_212270_T33Vspike_1_A	60 kDa heat shock protein, mitochondrial OS=Homo sapiens GN=HSPD1 PE=1 SV=2	CH60_HUMAN	61 055,7	1	29	44	88	0.00379	0.66	RGVMLAVDAVIAELKK	R	Q	0.997	6.13	0.564	1 713,0093
EC_212270_T33Vspike_1_A	60 kDa heat shock protein, mitochondrial OS=Homo sapiens GN=HSPD1 PE=1 SV=2	CH60_HUMAN	61 055,7	1	29	44	88	0.00379	0.66	SIAKEGFEKISK	R	G	0.997	3.44	0.303	1 336,7472
EC_212270_T33Vspike_1_A	60 kDa heat shock protein, mitochondrial OS=Homo sapiens GN=HSPD1 PE=1 SV=2	CH60_HUMAN	61 055,7	1	29	44	88	0.00379	0.66	SIDLKDKYK	K	N	0.794	2.27	0.325	1 109,6203
EC_212270_T33Vspike_1_A	60 kDa heat shock protein, mitochondrial OS=Homo sapiens GN=HSPD1 PE=1 SV=2	CH60_HUMAN	61 055,7	1	29	44	88	0.00379	0.66	TALLDAAGVASLLTTAEVVVTEIPKEEKDPGMGAMGGMGGGMGGGMF	R	-	0.985	3.48	0.221	4 556,1746
EC_212270_T33Vspike_1_A	60 kDa heat shock protein, mitochondrial OS=Homo sapiens GN=HSPD1 PE=1 SV=2	CH60_HUMAN	61 055,7	1	29	44	88	0.00379	0.66	TLKIPAMTIAK	R	N	0.997	3.56	0.406	1 186,7230
EC_212270_T33Vspike_1_A	60 kDa heat shock protein, mitochondrial OS=Homo sapiens GN=HSPD1 PE=1 SV=2	CH60_HUMAN	61 055,7	1	29	44	88	0.00379	0.66	TLKIPAMTIAKNAGVEGSLIVEK	R	I	0.97	3.01	0.42	2 383,3632
EC_212270_T33Vspike_1_A	60 kDa heat shock protein, mitochondrial OS=Homo sapiens GN=HSPD1 PE=1 SV=2	CH60_HUMAN	61 055,7	1	29	44	88	0.00379	0.66	TVIIEQSWGSPK	R	V	0.997	3.74	0.387	1 344,7159
EC_212270_T33Vspike_1_A	60 kDa heat shock protein, mitochondrial OS=Homo sapiens GN=HSPD1 PE=1 SV=2	CH60_HUMAN	61 055,7	1	29	44	88	0.00379	0.66	TVIIEQSWGSPKVTK	R	D	0.997	3.8	0.469	1 672,9270
EC_212270_T33Vspike_1_A	60 kDa heat shock protein, mitochondrial OS=Homo sapiens GN=HSPD1 PE=1 SV=2	CH60_HUMAN	61 055,7	1	29	44	88	0.00379	0.66	VGEVIVTKDDAMLLK	K	G	0.996	3.68	0.371	1 630,9087
EC_212270_T33Vspike_1_A	60 kDa heat shock protein, mitochondrial OS=Homo sapiens GN=HSPD1 PE=1 SV=2	CH60_HUMAN	61 055,7	1	29	44	88	0.00379	0.66	VGLQVVAVK	K	A	0.997	3.17	0.175	912.588
EC_212270_T33Vspike_1_A	60 kDa heat shock protein, mitochondrial OS=Homo sapiens GN=HSPD1 PE=1 SV=2	CH60_HUMAN	61 055,7	1	29	44	88	0.00379	0.66	VTDALNATRAAVEEGIVLGGGCALLR	R	C	0.997	3.77	0.344	2 626,3984
EC_212270_T33Vspike_1_B	60 kDa heat shock protein, mitochondrial OS=Homo sapiens GN=HSPD1 PE=1 SV=2	CH60_HUMAN	61 055,7	1	23	32	59	0.00268	0.548	AAVEEGIVLGGGCALLR	R	C	0.997	4.68	0.468	1 684,9053
EC_212270_T33Vspike_1_B	60 kDa heat shock protein, mitochondrial OS=Homo sapiens GN=HSPD1 PE=1 SV=2	CH60_HUMAN	61 055,7	1	23	32	59	0.00268	0.548	ALMLQGVDLLADAVAVTMGPK	R	G	0.997	5.07	0.547	2 145,1298
EC_212270_T33Vspike_1_B	60 kDa heat shock protein, mitochondrial OS=Homo sapiens GN=HSPD1 PE=1 SV=2	CH60_HUMAN	61 055,7	1	23	32	59	0.00268	0.548	ALMLQGVDLLADAVAVTMGPKGR	R	T	0.997	4.88	0.587	2 326,2625
EC_212270_T33Vspike_1_B	60 kDa heat shock protein, mitochondrial OS=Homo sapiens GN=HSPD1 PE=1 SV=2	CH60_HUMAN	61 055,7	1	23	32	59	0.00268	0.548	GVMLAVDAVIAELK	R	K	0.997	4.14	0.378	1 428,8132
EC_212270_T33Vspike_1_B	60 kDa heat shock protein, mitochondrial OS=Homo sapiens GN=HSPD1 PE=1 SV=2	CH60_HUMAN	61 055,7	1	23	32	59	0.00268	0.548	GVMLAVDAVIAELKK	R	Q	0.997	4.57	0.456	1 556,9082
EC_212270_T33Vspike_1_B	60 kDa heat shock protein, mitochondrial OS=Homo sapiens GN=HSPD1 PE=1 SV=2	CH60_HUMAN	61 055,7	1	23	32	59	0.00268	0.548	IMQSSSEVGYDAMAGDFVNMVEK	K	G	0.997	4.04	0.536	2 508,1092
EC_212270_T33Vspike_1_B	60 kDa heat shock protein, mitochondrial OS=Homo sapiens GN=HSPD1 PE=1 SV=2	CH60_HUMAN	61 055,7	1	23	32	59	0.00268	0.548	IMQSSSEVGYDAMAGDFVNMVEKGIIDPTKVVR	K	T	0.977	3.32	0.399	3 586,7593
EC_212270_T33Vspike_1_B	60 kDa heat shock protein, mitochondrial OS=Homo sapiens GN=HSPD1 PE=1 SV=2	CH60_HUMAN	61 055,7	1	23	32	59	0.00268	0.548	IQEIIEQLDVTTSEYEKEKLNER	R	L	0.964	3.1	0.237	2 807,4312
EC_212270_T33Vspike_1_B	60 kDa heat shock protein, mitochondrial OS=Homo sapiens GN=HSPD1 PE=1 SV=2	CH60_HUMAN	61 055,7	1	23	32	59	0.00268	0.548	ISSIQSIVPALEIANAHRKPLVIIAEDVDGEALSTLVLNRLK	K	V	0.991	2.57	0.409	4 506,5662
EC_212270_T33Vspike_1_B	60 kDa heat shock protein, mitochondrial OS=Homo sapiens GN=HSPD1 PE=1 SV=2	CH60_HUMAN	61 055,7	1	23	32	59	0.00268	0.548	LKVGLQVVAVKAPGFGDNR	R	K	0.803	1.88	0.195	1 968,1391
EC_212270_T33Vspike_1_B	60 kDa heat shock protein, mitochondrial OS=Homo sapiens GN=HSPD1 PE=1 SV=2	CH60_HUMAN	61 055,7	1	23	32	59	0.00268	0.548	LSDGVAVLK	K	V	0.943	2.53	0.0987	901.535
EC_212270_T33Vspike_1_B	60 kDa heat shock protein, mitochondrial OS=Homo sapiens GN=HSPD1 PE=1 SV=2	CH60_HUMAN	61 055,7	1	23	32	59	0.00268	0.548	LVQDVANNTNEEAGDGTTTATVLAR	K	S	0.997	4.15	0.36	2 560,2487
EC_212270_T33Vspike_1_B	60 kDa heat shock protein, mitochondrial OS=Homo sapiens GN=HSPD1 PE=1 SV=2	CH60_HUMAN	61 055,7	1	23	32	59	0.00268	0.548	NAGVEGSLIVEK	K	I	0.997	3.32	0.372	1 215,6580
EC_212270_T33Vspike_1_B	60 kDa heat shock protein, mitochondrial OS=Homo sapiens GN=HSPD1 PE=1 SV=2	CH60_HUMAN	61 055,7	1	23	32	59	0.00268	0.548	QSKPVTTPEEIAQVATISANGDKEIGNIISDAMKK	K	V	0.997	4.02	0.459	3 683,9165
EC_212270_T33Vspike_1_B	60 kDa heat shock protein, mitochondrial OS=Homo sapiens GN=HSPD1 PE=1 SV=2	CH60_HUMAN	61 055,7	1	23	32	59	0.00268	0.548	RGVMLAVDAVIAELKK	R	Q	0.997	5.5	0.55	1 713,0093
EC_212270_T33Vspike_1_B	60 kDa heat shock protein, mitochondrial OS=Homo sapiens GN=HSPD1 PE=1 SV=2	CH60_HUMAN	61 055,7	1	23	32	59	0.00268	0.548	SIAKEGFEKISK	R	G	0.997	3.99	0.25	1 336,7472
EC_212270_T33Vspike_1_B	60 kDa heat shock protein, mitochondrial OS=Homo sapiens GN=HSPD1 PE=1 SV=2	CH60_HUMAN	61 055,7	1	23	32	59	0.00268	0.548	TLKIPAMTIAK	R	N	0.997	3.66	0.408	1 186,7230
EC_212270_T33Vspike_1_B	60 kDa heat shock protein, mitochondrial OS=Homo sapiens GN=HSPD1 PE=1 SV=2	CH60_HUMAN	61 055,7	1	23	32	59	0.00268	0.548	TLKIPAMTIAKNAGVEGSLIVEK	R	I	0.99	3.62	0.532	2 383,3632
EC_212270_T33Vspike_1_B	60 kDa heat shock protein, mitochondrial OS=Homo sapiens GN=HSPD1 PE=1 SV=2	CH60_HUMAN	61 055,7	1	23	32	59	0.00268	0.548	TVIIEQSWGSPK	R	V	0.997	4.15	0.505	1 344,7159
EC_212270_T33Vspike_1_B	60 kDa heat shock protein, mitochondrial OS=Homo sapiens GN=HSPD1 PE=1 SV=2	CH60_HUMAN	61 055,7	1	23	32	59	0.00268	0.548	TVIIEQSWGSPKVTK	R	D	0.997	3.57	0.463	1 672,9270
EC_212270_T33Vspike_1_B	60 kDa heat shock protein, mitochondrial OS=Homo sapiens GN=HSPD1 PE=1 SV=2	CH60_HUMAN	61 055,7	1	23	32	59	0.00268	0.548	VGEVIVTKDDAMLLK	K	G	0.949	3.16	0.247	1 630,9087
EC_212270_T33Vspike_1_B	60 kDa heat shock protein, mitochondrial OS=Homo sapiens GN=HSPD1 PE=1 SV=2	CH60_HUMAN	61 055,7	1	23	32	59	0.00268	0.548	VTDALNATR	R	A	0.885	2.45	0.165	960.511
EC_212270_T33Vspike_1_B	60 kDa heat shock protein, mitochondrial OS=Homo sapiens GN=HSPD1 PE=1 SV=2	CH60_HUMAN	61 055,7	1	23	32	59	0.00268	0.548	VTDALNATRAAVEEGIVLGGGCALLR	R	C	0.997	3.68	0.376	2 626,3984
EC_212270_T33Vspike_2_A	60 kDa heat shock protein, mitochondrial OS=Homo sapiens GN=HSPD1 PE=1 SV=2	CH60_HUMAN	61 055,7	1	1	2	46	0.00192	0.44	AAVEEGIVLGGGCALLR	R	C	0.997	5.26	0.448	1 627,8838
EC_212270_T33Vspike_2_A	60 kDa heat shock protein, mitochondrial OS=Homo sapiens GN=HSPD1 PE=1 SV=2	CH60_HUMAN	61 055,7	1	1	2	46	0.00192	0.44	ALMLQGVDLLADAVAVTMGPK	R	G	0.997	3.68	0.503	2 129,1349
EC_212270_T33Vspike_2_A	60 kDa heat shock protein, mitochondrial OS=Homo sapiens GN=HSPD1 PE=1 SV=2	CH60_HUMAN	61 055,7	1	1	2	46	0.00192	0.44	GRTVIIEQSWGSPK	K	V	0.997	3.39	0.443	1 557,8385
EC_212270_T33Vspike_2_A	60 kDa heat shock protein, mitochondrial OS=Homo sapiens GN=HSPD1 PE=1 SV=2	CH60_HUMAN	61 055,7	1	1	2	46	0.00192	0.44	GYISPYFINTSK	R	G	0.885	3.13	0.0425	1 389,7049
EC_212270_T33Vspike_2_A	60 kDa heat shock protein, mitochondrial OS=Homo sapiens GN=HSPD1 PE=1 SV=2	CH60_HUMAN	61 055,7	1	1	2	46	0.00192	0.44	IMQSSSEVGYDAMAGDFVNMVEK	K	G	0.984	2.77	0.476	2 508,1092
EC_212270_T33Vspike_2_A	60 kDa heat shock protein, mitochondrial OS=Homo sapiens GN=HSPD1 PE=1 SV=2	CH60_HUMAN	61 055,7	1	1	2	46	0.00192	0.44	IQEIIEQLDVTTSEYEKEKLNER	R	L	0.987	3.22	0.3	2 807,4312
EC_212270_T33Vspike_2_A	60 kDa heat shock protein, mitochondrial OS=Homo sapiens GN=HSPD1 PE=1 SV=2	CH60_HUMAN	61 055,7	1	1	2	46	0.00192	0.44	KGVITVKDGK	R	T	0.768	2.34	0.358	1 044,6414
EC_212270_T33Vspike_2_A	60 kDa heat shock protein, mitochondrial OS=Homo sapiens GN=HSPD1 PE=1 SV=2	CH60_HUMAN	61 055,7	1	1	2	46	0.00192	0.44	LSDGVAVLK	K	V	0.864	2.34	0.205	901.535
EC_212270_T33Vspike_2_A	60 kDa heat shock protein, mitochondrial OS=Homo sapiens GN=HSPD1 PE=1 SV=2	CH60_HUMAN	61 055,7	1	1	2	46	0.00192	0.44	LVQDVANNTNEEAGDGTTTATVLAR	K	S	0.997	4.44	0.47	2 560,2487
EC_212270_T33Vspike_2_A	60 kDa heat shock protein, mitochondrial OS=Homo sapiens GN=HSPD1 PE=1 SV=2	CH60_HUMAN	61 055,7	1	1	2	46	0.00192	0.44	NAGVEGSLIVEK	K	I	0.997	3.65	0.4	1 215,6580
EC_212270_T33Vspike_2_A	60 kDa heat shock protein, mitochondrial OS=Homo sapiens GN=HSPD1 PE=1 SV=2	CH60_HUMAN	61 055,7	1	1	2	46	0.00192	0.44	RGVMLAVDAVIAELKK	R	Q	0.948	2.69	0.317	1 713,0093
EC_212270_T33Vspike_2_A	60 kDa heat shock protein, mitochondrial OS=Homo sapiens GN=HSPD1 PE=1 SV=2	CH60_HUMAN	61 055,7	1	1	2	46	0.00192	0.44	SIAKEGFEKISK	R	G	0.997	3.41	0.306	1 336,7472
EC_212270_T33Vspike_2_A	60 kDa heat shock protein, mitochondrial OS=Homo sapiens GN=HSPD1 PE=1 SV=2	CH60_HUMAN	61 055,7	1	1	2	46	0.00192	0.44	TLKIPAMTIAK	R	N	0.997	3.23	0.439	1 186,7230
EC_212270_T33Vspike_2_A	60 kDa heat shock protein, mitochondrial OS=Homo sapiens GN=HSPD1 PE=1 SV=2	CH60_HUMAN	61 055,7	1	1	2	46	0.00192	0.44	TLNDELEIIEGMK	K	F	0.997	3.83	0.533	1 504,7566
EC_212270_T33Vspike_2_A	60 kDa heat shock protein, mitochondrial OS=Homo sapiens GN=HSPD1 PE=1 SV=2	CH60_HUMAN	61 055,7	1	1	2	46	0.00192	0.44	TVIIEQSWGSPK	R	V	0.997	3.81	0.411	1 344,7159
EC_212270_T33Vspike_2_A	60 kDa heat shock protein, mitochondrial OS=Homo sapiens GN=HSPD1 PE=1 SV=2	CH60_HUMAN	61 055,7	1	1	2	46	0.00192	0.44	TVIIEQSWGSPKVTK	R	D	0.997	3.77	0.466	1 672,9270
EC_212270_T33Vspike_2_A	60 kDa heat shock protein, mitochondrial OS=Homo sapiens GN=HSPD1 PE=1 SV=2	CH60_HUMAN	61 055,7	1	1	2	46	0.00192	0.44	TVIIEQSWGSPKVTKDGVTVAK	R	S	0.997	3.57	0.526	2 343,2921
EC_212270_T33Vspike_2_A	60 kDa heat shock protein, mitochondrial OS=Homo sapiens GN=HSPD1 PE=1 SV=2	CH60_HUMAN	61 055,7	1	1	2	46	0.00192	0.44	VGGTSDVEVNEKKDR	K	V	0.829	3.03	0.145	1 632,8189
EC_212270_T33Vspike_2_A	60 kDa heat shock protein, mitochondrial OS=Homo sapiens GN=HSPD1 PE=1 SV=2	CH60_HUMAN	61 055,7	1	1	2	46	0.00192	0.44	VTDALNATR	R	A	0.884	2.94	0.135	960.511
EC_212270_T33Vspike_2_A	60 kDa heat shock protein, mitochondrial OS=Homo sapiens GN=HSPD1 PE=1 SV=2	CH60_HUMAN	61 055,7	1	1	2	46	0.00192	0.44	VTDALNATRAAVEEGIVLGGGCALLR	R	C	0.851	2.82	0.175	2 626,3984
EC_212270_T33Vspike_2_A	60 kDa heat shock protein, mitochondrial OS=Homo sapiens GN=HSPD1 PE=1 SV=2	CH60_HUMAN	61 055,7	1	1	2	46	0.00192	0.44	VTKDGVTVAK	K	S	0.944	2.66	0.322	1 017,5940
EC_212270_T33Vspike_2_B	60 kDa heat shock protein, mitochondrial OS=Homo sapiens GN=HSPD1 PE=1 SV=2	CH60_HUMAN	61 055,7	1	1	1	36	0.00157	0.34	AAVEEGIVLGGGCALLR	R	C	0.997	5.29	0.511	1 627,8838
EC_212270_T33Vspike_2_B	60 kDa heat shock protein, mitochondrial OS=Homo sapiens GN=HSPD1 PE=1 SV=2	CH60_HUMAN	61 055,7	1	1	1	36	0.00157	0.34	ALMLQGVDLLADAVAVTMGPK	R	G	0.997	4.23	0.566	2 129,1349
EC_212270_T33Vspike_2_B	60 kDa heat shock protein, mitochondrial OS=Homo sapiens GN=HSPD1 PE=1 SV=2	CH60_HUMAN	61 055,7	1	1	1	36	0.00157	0.34	GRTVIIEQSWGSPK	K	V	0.843	2.54	0.191	1 557,8385
EC_212270_T33Vspike_2_B	60 kDa heat shock protein, mitochondrial OS=Homo sapiens GN=HSPD1 PE=1 SV=2	CH60_HUMAN	61 055,7	1	1	1	36	0.00157	0.34	GRTVIIEQSWGSPKVTK	K	D	0.908	3.08	0.278	1 886,0496
EC_212270_T33Vspike_2_B	60 kDa heat shock protein, mitochondrial OS=Homo sapiens GN=HSPD1 PE=1 SV=2	CH60_HUMAN	61 055,7	1	1	1	36	0.00157	0.34	GYISPYFINTSK	R	G	0.956	3.08	0.023	1 389,7049
EC_212270_T33Vspike_2_B	60 kDa heat shock protein, mitochondrial OS=Homo sapiens GN=HSPD1 PE=1 SV=2	CH60_HUMAN	61 055,7	1	1	1	36	0.00157	0.34	IMQSSSEVGYDAMAGDFVNMVEK	K	G	0.982	2.75	0.507	2 508,1092
EC_212270_T33Vspike_2_B	60 kDa heat shock protein, mitochondrial OS=Homo sapiens GN=HSPD1 PE=1 SV=2	CH60_HUMAN	61 055,7	1	1	1	36	0.00157	0.34	LVQDVANNTNEEAGDGTTTATVLAR	K	S	0.997	4.18	0.55	2 560,2487
EC_212270_T33Vspike_2_B	60 kDa heat shock protein, mitochondrial OS=Homo sapiens GN=HSPD1 PE=1 SV=2	CH60_HUMAN	61 055,7	1	1	1	36	0.00157	0.34	NAGVEGSLIVEK	K	I	0.997	3.4	0.349	1 215,6580
EC_212270_T33Vspike_2_B	60 kDa heat shock protein, mitochondrial OS=Homo sapiens GN=HSPD1 PE=1 SV=2	CH60_HUMAN	61 055,7	1	1	1	36	0.00157	0.34	RGVMLAVDAVIAELKK	R	Q	0.997	3.25	0.477	1 713,0093
EC_212270_T33Vspike_2_B	60 kDa heat shock protein, mitochondrial OS=Homo sapiens GN=HSPD1 PE=1 SV=2	CH60_HUMAN	61 055,7	1	1	1	36	0.00157	0.34	SIAKEGFEKISK	R	G	0.997	3.52	0.303	1 336,7472
EC_212270_T33Vspike_2_B	60 kDa heat shock protein, mitochondrial OS=Homo sapiens GN=HSPD1 PE=1 SV=2	CH60_HUMAN	61 055,7	1	1	1	36	0.00157	0.34	SIDLKDKYK	K	N	0.751	2.04	0.297	1 109,6203
EC_212270_T33Vspike_2_B	60 kDa heat shock protein, mitochondrial OS=Homo sapiens GN=HSPD1 PE=1 SV=2	CH60_HUMAN	61 055,7	1	1	1	36	0.00157	0.34	TLKIPAMTIAK	R	N	0.997	3.7	0.396	1 186,7230
EC_212270_T33Vspike_2_B	60 kDa heat shock protein, mitochondrial OS=Homo sapiens GN=HSPD1 PE=1 SV=2	CH60_HUMAN	61 055,7	1	1	1	36	0.00157	0.34	TLNDELEIIEGMK	K	F	0.997	4.29	0.486	1 504,7566
EC_212270_T33Vspike_2_B	60 kDa heat shock protein, mitochondrial OS=Homo sapiens GN=HSPD1 PE=1 SV=2	CH60_HUMAN	61 055,7	1	1	1	36	0.00157	0.34	TVIIEQSWGSPK	R	V	0.997	3.6	0.369	1 344,7159
EC_212270_T33Vspike_2_B	60 kDa heat shock protein, mitochondrial OS=Homo sapiens GN=HSPD1 PE=1 SV=2	CH60_HUMAN	61 055,7	1	1	1	36	0.00157	0.34	TVIIEQSWGSPKVTK	R	D	0.997	3.94	0.406	1 672,9270
EC_212270_T33Vspike_2_B	60 kDa heat shock protein, mitochondrial OS=Homo sapiens GN=HSPD1 PE=1 SV=2	CH60_HUMAN	61 055,7	1	1	1	36	0.00157	0.34	TVIIEQSWGSPKVTKDGVTVAK	R	S	0.933	2.72	0.258	2 343,2921
EC_212270_T33Vspike_3_A	60 kDa heat shock protein, mitochondrial OS=Homo sapiens GN=HSPD1 PE=1 SV=2	CH60_HUMAN	61 055,7	1	10	13	96	0.00483	0.766	AAVEEGIVLGGGCALLR	R	C	0.997	4.13	0.538	1 684,9053
EC_212270_T33Vspike_3_A	60 kDa heat shock protein, mitochondrial OS=Homo sapiens GN=HSPD1 PE=1 SV=2	CH60_HUMAN	61 055,7	1	10	13	96	0.00483	0.766	ALMLQGVDLLADAVAVTMGPK	R	G	0.997	4.8	0.469	2 113,1399
EC_212270_T33Vspike_3_A	60 kDa heat shock protein, mitochondrial OS=Homo sapiens GN=HSPD1 PE=1 SV=2	CH60_HUMAN	61 055,7	1	10	13	96	0.00483	0.766	ALMLQGVDLLADAVAVTMGPKGR	R	T	0.997	4.2	0.537	2 326,2625
EC_212270_T33Vspike_3_A	60 kDa heat shock protein, mitochondrial OS=Homo sapiens GN=HSPD1 PE=1 SV=2	CH60_HUMAN	61 055,7	1	10	13	96	0.00483	0.766	CIPALDSLTPANEDQKIGIEIIKR	R	T	0.271	2.06	0.0937	2 694,4500
EC_212270_T33Vspike_3_A	60 kDa heat shock protein, mitochondrial OS=Homo sapiens GN=HSPD1 PE=1 SV=2	CH60_HUMAN	61 055,7	1	10	13	96	0.00483	0.766	GRTVIIEQSWGSPK	K	V	0.937	2.68	0.326	1 557,8385
EC_212270_T33Vspike_3_A	60 kDa heat shock protein, mitochondrial OS=Homo sapiens GN=HSPD1 PE=1 SV=2	CH60_HUMAN	61 055,7	1	10	13	96	0.00483	0.766	GVMLAVDAVIAELK	R	K	0.776	2.86	0.142	1 428,8132
EC_212270_T33Vspike_3_A	60 kDa heat shock protein, mitochondrial OS=Homo sapiens GN=HSPD1 PE=1 SV=2	CH60_HUMAN	61 055,7	1	10	13	96	0.00483	0.766	GVMLAVDAVIAELKK	R	Q	0.997	4.52	0.436	1 556,9082
EC_212270_T33Vspike_3_A	60 kDa heat shock protein, mitochondrial OS=Homo sapiens GN=HSPD1 PE=1 SV=2	CH60_HUMAN	61 055,7	1	10	13	96	0.00483	0.766	GYISPYFINTSK	R	G	0.278	2.33	0.0318	1 389,7049
EC_212270_T33Vspike_3_A	60 kDa heat shock protein, mitochondrial OS=Homo sapiens GN=HSPD1 PE=1 SV=2	CH60_HUMAN	61 055,7	1	10	13	96	0.00483	0.766	GYISPYFINTSKGQK	R	C	0.217	1.25	0.00944	1 702,8800
EC_212270_T33Vspike_3_A	60 kDa heat shock protein, mitochondrial OS=Homo sapiens GN=HSPD1 PE=1 SV=2	CH60_HUMAN	61 055,7	1	10	13	96	0.00483	0.766	IMQSSSEVGYDAMAGDFVNMVEK	K	G	0.955	3.02	0.468	2 508,1092
EC_212270_T33Vspike_3_A	60 kDa heat shock protein, mitochondrial OS=Homo sapiens GN=HSPD1 PE=1 SV=2	CH60_HUMAN	61 055,7	1	10	13	96	0.00483	0.766	IMQSSSEVGYDAMAGDFVNMVEKGIIDPTK	K	V	0.453	2.25	0.146	3 232,5214
EC_212270_T33Vspike_3_A	60 kDa heat shock protein, mitochondrial OS=Homo sapiens GN=HSPD1 PE=1 SV=2	CH60_HUMAN	61 055,7	1	10	13	96	0.00483	0.766	IMQSSSEVGYDAMAGDFVNMVEKGIIDPTKVVR	K	T	0.997	4.6	0.547	3 586,7593
EC_212270_T33Vspike_3_A	60 kDa heat shock protein, mitochondrial OS=Homo sapiens GN=HSPD1 PE=1 SV=2	CH60_HUMAN	61 055,7	1	10	13	96	0.00483	0.766	IQEIIEQLDVTTSEYEKEKLNER	R	L	0.955	2.99	0.285	2 807,4312
EC_212270_T33Vspike_3_A	60 kDa heat shock protein, mitochondrial OS=Homo sapiens GN=HSPD1 PE=1 SV=2	CH60_HUMAN	61 055,7	1	10	13	96	0.00483	0.766	ISSIQSIVPALEIANAHRKPLVIIAEDVDGEALSTLVLNR	K	L	0.644	2.5	0.188	4 265,3871
EC_212270_T33Vspike_3_A	60 kDa heat shock protein, mitochondrial OS=Homo sapiens GN=HSPD1 PE=1 SV=2	CH60_HUMAN	61 055,7	1	10	13	96	0.00483	0.766	ISSIQSIVPALEIANAHRKPLVIIAEDVDGEALSTLVLNRLK	K	V	0.188	0.985	0.0409	4 506,5662
EC_212270_T33Vspike_3_A	60 kDa heat shock protein, mitochondrial OS=Homo sapiens GN=HSPD1 PE=1 SV=2	CH60_HUMAN	61 055,7	1	10	13	96	0.00483	0.766	KPLVIIAEDVDGEALSTLVLNR	R	L	0.177	2.25	0	2 365,3340
EC_212270_T33Vspike_3_A	60 kDa heat shock protein, mitochondrial OS=Homo sapiens GN=HSPD1 PE=1 SV=2	CH60_HUMAN	61 055,7	1	10	13	96	0.00483	0.766	LSDGVAVLK	K	V	0.408	2.15	0.151	901.535
EC_212270_T33Vspike_3_A	60 kDa heat shock protein, mitochondrial OS=Homo sapiens GN=HSPD1 PE=1 SV=2	CH60_HUMAN	61 055,7	1	10	13	96	0.00483	0.766	LVQDVANNTNEEAGDGTTTATVLAR	K	S	0.629	2.34	0.194	2 560,2487
EC_212270_T33Vspike_3_A	60 kDa heat shock protein, mitochondrial OS=Homo sapiens GN=HSPD1 PE=1 SV=2	CH60_HUMAN	61 055,7	1	10	13	96	0.00483	0.766	NAGVEGSLIVEKIMQSSSEVGYDAMAGDFVNMVEK	K	G	0.979	3.03	0.388	3 704,7494
EC_212270_T33Vspike_3_A	60 kDa heat shock protein, mitochondrial OS=Homo sapiens GN=HSPD1 PE=1 SV=2	CH60_HUMAN	61 055,7	1	10	13	96	0.00483	0.766	NIGAKLVQDVANNTNEEAGDGTTTATVLAR	K	S	0.903	2.7	0.303	3 043,5293
EC_212270_T33Vspike_3_A	60 kDa heat shock protein, mitochondrial OS=Homo sapiens GN=HSPD1 PE=1 SV=2	CH60_HUMAN	61 055,7	1	10	13	96	0.00483	0.766	NQLKDMAIATGGAVFGEEGLTLNLEDVQPHDLGK	K	V	0.946	3.29	0.214	3 580,7958
EC_212270_T33Vspike_3_A	60 kDa heat shock protein, mitochondrial OS=Homo sapiens GN=HSPD1 PE=1 SV=2	CH60_HUMAN	61 055,7	1	10	13	96	0.00483	0.766	QSKPVTTPEEIAQVATISANGDKEIGNIISDAMKK	K	V	0.988	3.41	0.274	3 683,9165
EC_212270_T33Vspike_3_A	60 kDa heat shock protein, mitochondrial OS=Homo sapiens GN=HSPD1 PE=1 SV=2	CH60_HUMAN	61 055,7	1	10	13	96	0.00483	0.766	RGVMLAVDAVIAELKK	R	Q	0.997	5.07	0.529	1 713,0093
EC_212270_T33Vspike_3_A	60 kDa heat shock protein, mitochondrial OS=Homo sapiens GN=HSPD1 PE=1 SV=2	CH60_HUMAN	61 055,7	1	10	13	96	0.00483	0.766	SIAKEGFEKISK	R	G	0.997	3.62	0.261	1 336,7472
EC_212270_T33Vspike_3_A	60 kDa heat shock protein, mitochondrial OS=Homo sapiens GN=HSPD1 PE=1 SV=2	CH60_HUMAN	61 055,7	1	10	13	96	0.00483	0.766	SIDLKDKYK	K	N	0.156	1.13	0.0822	1 109,6203
EC_212270_T33Vspike_3_A	60 kDa heat shock protein, mitochondrial OS=Homo sapiens GN=HSPD1 PE=1 SV=2	CH60_HUMAN	61 055,7	1	10	13	96	0.00483	0.766	TALLDAAGVASLLTTAEVVVTEIPKEEKDPGMGAMGGMGGGMGGGMF	R	-	0.306	1.91	0.0235	4 524,1847
EC_212270_T33Vspike_3_A	60 kDa heat shock protein, mitochondrial OS=Homo sapiens GN=HSPD1 PE=1 SV=2	CH60_HUMAN	61 055,7	1	10	13	96	0.00483	0.766	TLKIPAMTIAK	R	N	0.997	3.26	0.309	1 186,7230
EC_212270_T33Vspike_3_A	60 kDa heat shock protein, mitochondrial OS=Homo sapiens GN=HSPD1 PE=1 SV=2	CH60_HUMAN	61 055,7	1	10	13	96	0.00483	0.766	TLKIPAMTIAKNAGVEGSLIVEK	R	I	0.741	2.54	0.157	2 383,3632
EC_212270_T33Vspike_3_A	60 kDa heat shock protein, mitochondrial OS=Homo sapiens GN=HSPD1 PE=1 SV=2	CH60_HUMAN	61 055,7	1	10	13	96	0.00483	0.766	TLNDELEIIEGMKFDR	K	G	0.286	1.83	0.0471	1 922,9531
EC_212270_T33Vspike_3_A	60 kDa heat shock protein, mitochondrial OS=Homo sapiens GN=HSPD1 PE=1 SV=2	CH60_HUMAN	61 055,7	1	10	13	96	0.00483	0.766	TVIIEQSWGSPK	R	V	0.997	3.61	0.341	1 344,7159
EC_212270_T33Vspike_3_A	60 kDa heat shock protein, mitochondrial OS=Homo sapiens GN=HSPD1 PE=1 SV=2	CH60_HUMAN	61 055,7	1	10	13	96	0.00483	0.766	TVIIEQSWGSPKVTK	R	D	0.937	2.79	0.336	1 672,9270
EC_212270_T33Vspike_3_A	60 kDa heat shock protein, mitochondrial OS=Homo sapiens GN=HSPD1 PE=1 SV=2	CH60_HUMAN	61 055,7	1	10	13	96	0.00483	0.766	TVIIEQSWGSPKVTKDGVTVAK	R	S	0.291	1.82	0.0504	2 343,2921
EC_212270_T33Vspike_3_A	60 kDa heat shock protein, mitochondrial OS=Homo sapiens GN=HSPD1 PE=1 SV=2	CH60_HUMAN	61 055,7	1	10	13	96	0.00483	0.766	VTDALNATR	R	A	0.334	1.9	0.117	960.511
EC_212270_T33Vspike_3_A	60 kDa heat shock protein, mitochondrial OS=Homo sapiens GN=HSPD1 PE=1 SV=2	CH60_HUMAN	61 055,7	1	10	13	96	0.00483	0.766	VTDALNATRAAVEEGIVLGGGCALLR	R	C	0.997	3.93	0.294	2 626,3984
EC_212270_T33Vspike_3_A	60 kDa heat shock protein, mitochondrial OS=Homo sapiens GN=HSPD1 PE=1 SV=2	CH60_HUMAN	61 055,7	1	10	13	96	0.00483	0.766	VTKDGVTVAK	K	S	0.765	2.48	0.252	1 017,5940
EC_212270_T33Vspike_3_B	60 kDa heat shock protein, mitochondrial OS=Homo sapiens GN=HSPD1 PE=1 SV=2	CH60_HUMAN	61 055,7	1	8	11	78	0.00409	0.646	AAVEEGIVLGGGCALLR	R	C	0.997	4.9	0.465	1 627,8838
EC_212270_T33Vspike_3_B	60 kDa heat shock protein, mitochondrial OS=Homo sapiens GN=HSPD1 PE=1 SV=2	CH60_HUMAN	61 055,7	1	8	11	78	0.00409	0.646	ALMLQGVDLLADAVAVTMGPK	R	G	0.997	5.13	0.564	2 129,1349
EC_212270_T33Vspike_3_B	60 kDa heat shock protein, mitochondrial OS=Homo sapiens GN=HSPD1 PE=1 SV=2	CH60_HUMAN	61 055,7	1	8	11	78	0.00409	0.646	ALMLQGVDLLADAVAVTMGPKGR	R	T	0.997	4.75	0.544	2 326,2625
EC_212270_T33Vspike_3_B	60 kDa heat shock protein, mitochondrial OS=Homo sapiens GN=HSPD1 PE=1 SV=2	CH60_HUMAN	61 055,7	1	8	11	78	0.00409	0.646	GRTVIIEQSWGSPK	K	V	0.816	2.26	0.44	1 557,8385
EC_212270_T33Vspike_3_B	60 kDa heat shock protein, mitochondrial OS=Homo sapiens GN=HSPD1 PE=1 SV=2	CH60_HUMAN	61 055,7	1	8	11	78	0.00409	0.646	GRTVIIEQSWGSPKVTK	K	D	0.205	2.04	0.148	1 886,0496
EC_212270_T33Vspike_3_B	60 kDa heat shock protein, mitochondrial OS=Homo sapiens GN=HSPD1 PE=1 SV=2	CH60_HUMAN	61 055,7	1	8	11	78	0.00409	0.646	GVMLAVDAVIAELKK	R	Q	0.997	4.71	0.455	1 556,9082
EC_212270_T33Vspike_3_B	60 kDa heat shock protein, mitochondrial OS=Homo sapiens GN=HSPD1 PE=1 SV=2	CH60_HUMAN	61 055,7	1	8	11	78	0.00409	0.646	GYISPYFINTSKGQK	R	C	0.265	1.32	0.195	1 702,8800
EC_212270_T33Vspike_3_B	60 kDa heat shock protein, mitochondrial OS=Homo sapiens GN=HSPD1 PE=1 SV=2	CH60_HUMAN	61 055,7	1	8	11	78	0.00409	0.646	IMQSSSEVGYDAMAGDFVNMVEK	K	G	0.997	4.66	0.642	2 508,1092
EC_212270_T33Vspike_3_B	60 kDa heat shock protein, mitochondrial OS=Homo sapiens GN=HSPD1 PE=1 SV=2	CH60_HUMAN	61 055,7	1	8	11	78	0.00409	0.646	IMQSSSEVGYDAMAGDFVNMVEKGIIDPTKVVR	K	T	0.912	3.15	0.275	3 586,7593
EC_212270_T33Vspike_3_B	60 kDa heat shock protein, mitochondrial OS=Homo sapiens GN=HSPD1 PE=1 SV=2	CH60_HUMAN	61 055,7	1	8	11	78	0.00409	0.646	IQEIIEQLDVTTSEYEKEKLNER	R	L	0.921	2.94	0.141	2 807,4312
EC_212270_T33Vspike_3_B	60 kDa heat shock protein, mitochondrial OS=Homo sapiens GN=HSPD1 PE=1 SV=2	CH60_HUMAN	61 055,7	1	8	11	78	0.00409	0.646	ISSIQSIVPALEIANAHRKPLVIIAEDVDGEALSTLVLNR	K	L	0.615	2.2	-0.0485	4 265,3871
EC_212270_T33Vspike_3_B	60 kDa heat shock protein, mitochondrial OS=Homo sapiens GN=HSPD1 PE=1 SV=2	CH60_HUMAN	61 055,7	1	8	11	78	0.00409	0.646	ISSIQSIVPALEIANAHRKPLVIIAEDVDGEALSTLVLNRLK	K	V	0.249	1.94	0.147	4 506,5662
EC_212270_T33Vspike_3_B	60 kDa heat shock protein, mitochondrial OS=Homo sapiens GN=HSPD1 PE=1 SV=2	CH60_HUMAN	61 055,7	1	8	11	78	0.00409	0.646	KISSIQSIVPALEIANAHRKPLVIIAEDVDGEALSTLVLNR	K	L	0.463	2.24	0.182	4 393,4821
EC_212270_T33Vspike_3_B	60 kDa heat shock protein, mitochondrial OS=Homo sapiens GN=HSPD1 PE=1 SV=2	CH60_HUMAN	61 055,7	1	8	11	78	0.00409	0.646	LSDGVAVLK	K	V	0.63	2.19	0.102	901.535
EC_212270_T33Vspike_3_B	60 kDa heat shock protein, mitochondrial OS=Homo sapiens GN=HSPD1 PE=1 SV=2	CH60_HUMAN	61 055,7	1	8	11	78	0.00409	0.646	LVQDVANNTNEEAGDGTTTATVLAR	K	S	0.836	2.63	0.226	2 560,2487
EC_212270_T33Vspike_3_B	60 kDa heat shock protein, mitochondrial OS=Homo sapiens GN=HSPD1 PE=1 SV=2	CH60_HUMAN	61 055,7	1	8	11	78	0.00409	0.646	NAGVEGSLIVEKIMQSSSEVGYDAMAGDFVNMVEK	K	G	0.908	2.64	0.309	3 704,7494
EC_212270_T33Vspike_3_B	60 kDa heat shock protein, mitochondrial OS=Homo sapiens GN=HSPD1 PE=1 SV=2	CH60_HUMAN	61 055,7	1	8	11	78	0.00409	0.646	NIGAKLVQDVANNTNEEAGDGTTTATVLAR	K	S	0.337	1.81	0.142	3 043,5293
EC_212270_T33Vspike_3_B	60 kDa heat shock protein, mitochondrial OS=Homo sapiens GN=HSPD1 PE=1 SV=2	CH60_HUMAN	61 055,7	1	8	11	78	0.00409	0.646	QSKPVTTPEEIAQVATISANGDKEIGNIISDAMKK	K	V	0.997	3.36	0.318	3 683,9165
EC_212270_T33Vspike_3_B	60 kDa heat shock protein, mitochondrial OS=Homo sapiens GN=HSPD1 PE=1 SV=2	CH60_HUMAN	61 055,7	1	8	11	78	0.00409	0.646	RGVMLAVDAVIAELKK	R	Q	0.997	4.8	0.512	1 713,0093
EC_212270_T33Vspike_3_B	60 kDa heat shock protein, mitochondrial OS=Homo sapiens GN=HSPD1 PE=1 SV=2	CH60_HUMAN	61 055,7	1	8	11	78	0.00409	0.646	SIDLKDKYK	K	N	0.293	1.98	0.215	1 109,6203
EC_212270_T33Vspike_3_B	60 kDa heat shock protein, mitochondrial OS=Homo sapiens GN=HSPD1 PE=1 SV=2	CH60_HUMAN	61 055,7	1	8	11	78	0.00409	0.646	TALLDAAGVASLLTTAEVVVTEIPKEEKDPGMGAMGGMGGGMGGGMF	R	-	0.487	2.18	0.12	4 540,1797
EC_212270_T33Vspike_3_B	60 kDa heat shock protein, mitochondrial OS=Homo sapiens GN=HSPD1 PE=1 SV=2	CH60_HUMAN	61 055,7	1	8	11	78	0.00409	0.646	TLKIPAMTIAK	R	N	0.997	3.73	0.468	1 186,7230
EC_212270_T33Vspike_3_B	60 kDa heat shock protein, mitochondrial OS=Homo sapiens GN=HSPD1 PE=1 SV=2	CH60_HUMAN	61 055,7	1	8	11	78	0.00409	0.646	TLKIPAMTIAKNAGVEGSLIVEK	R	I	0.868	2.57	0.306	2 383,3632
EC_212270_T33Vspike_3_B	60 kDa heat shock protein, mitochondrial OS=Homo sapiens GN=HSPD1 PE=1 SV=2	CH60_HUMAN	61 055,7	1	8	11	78	0.00409	0.646	TLNDELEIIEGMKFDR	K	G	0.737	2.13	0.307	1 922,9531
EC_212270_T33Vspike_3_B	60 kDa heat shock protein, mitochondrial OS=Homo sapiens GN=HSPD1 PE=1 SV=2	CH60_HUMAN	61 055,7	1	8	11	78	0.00409	0.646	TVIIEQSWGSPK	R	V	0.997	3.83	0.335	1 344,7159
EC_212270_T33Vspike_3_B	60 kDa heat shock protein, mitochondrial OS=Homo sapiens GN=HSPD1 PE=1 SV=2	CH60_HUMAN	61 055,7	1	8	11	78	0.00409	0.646	TVIIEQSWGSPKVTK	R	D	0.997	3.14	0.515	1 672,9270
EC_212270_T33Vspike_3_B	60 kDa heat shock protein, mitochondrial OS=Homo sapiens GN=HSPD1 PE=1 SV=2	CH60_HUMAN	61 055,7	1	8	11	78	0.00409	0.646	TVIIEQSWGSPKVTKDGVTVAK	R	S	0.5	2.15	0.0532	2 343,2921
EC_212270_T33Vspike_3_B	60 kDa heat shock protein, mitochondrial OS=Homo sapiens GN=HSPD1 PE=1 SV=2	CH60_HUMAN	61 055,7	1	8	11	78	0.00409	0.646	VTDALNATR	R	A	0.685	1.98	0.141	960.511
EC_212270_T33Vspike_3_B	60 kDa heat shock protein, mitochondrial OS=Homo sapiens GN=HSPD1 PE=1 SV=2	CH60_HUMAN	61 055,7	1	8	11	78	0.00409	0.646	VTDALNATRAAVEEGIVLGGGCALLR	R	C	0.997	2.98	0.137	2 626,3984
EC_212270_T33Vspike_4_A	60 kDa heat shock protein, mitochondrial OS=Homo sapiens GN=HSPD1 PE=1 SV=2	CH60_HUMAN	61 055,7	1	1	1	37	0.00149	0.311	AAVEEGIVLGGGCALLR	R	C	0.997	5.23	0.443	1 627,8838
EC_212270_T33Vspike_4_A	60 kDa heat shock protein, mitochondrial OS=Homo sapiens GN=HSPD1 PE=1 SV=2	CH60_HUMAN	61 055,7	1	1	1	37	0.00149	0.311	ALMLQGVDLLADAVAVTMGPK	R	G	0.997	5.82	0.55	2 129,1349
EC_212270_T33Vspike_4_A	60 kDa heat shock protein, mitochondrial OS=Homo sapiens GN=HSPD1 PE=1 SV=2	CH60_HUMAN	61 055,7	1	1	1	37	0.00149	0.311	ALMLQGVDLLADAVAVTMGPKGR	R	T	0.997	5.06	0.549	2 326,2625
EC_212270_T33Vspike_4_A	60 kDa heat shock protein, mitochondrial OS=Homo sapiens GN=HSPD1 PE=1 SV=2	CH60_HUMAN	61 055,7	1	1	1	37	0.00149	0.311	GRTVIIEQSWGSPK	K	V	0.954	2.73	0.311	1 557,8385
EC_212270_T33Vspike_4_A	60 kDa heat shock protein, mitochondrial OS=Homo sapiens GN=HSPD1 PE=1 SV=2	CH60_HUMAN	61 055,7	1	1	1	37	0.00149	0.311	GVMLAVDAVIAELKK	R	Q	0.997	4.59	0.478	1 556,9082
EC_212270_T33Vspike_4_A	60 kDa heat shock protein, mitochondrial OS=Homo sapiens GN=HSPD1 PE=1 SV=2	CH60_HUMAN	61 055,7	1	1	1	37	0.00149	0.311	IMQSSSEVGYDAMAGDFVNMVEKGIIDPTKVVR	K	T	0.997	3.88	0.454	3 586,7593
EC_212270_T33Vspike_4_A	60 kDa heat shock protein, mitochondrial OS=Homo sapiens GN=HSPD1 PE=1 SV=2	CH60_HUMAN	61 055,7	1	1	1	37	0.00149	0.311	LVQDVANNTNEEAGDGTTTATVLAR	K	S	0.978	3.06	0.401	2 560,2487
EC_212270_T33Vspike_4_A	60 kDa heat shock protein, mitochondrial OS=Homo sapiens GN=HSPD1 PE=1 SV=2	CH60_HUMAN	61 055,7	1	1	1	37	0.00149	0.311	NAGVEGSLIVEK	K	I	0.997	3.45	0.319	1 215,6580
EC_212270_T33Vspike_4_A	60 kDa heat shock protein, mitochondrial OS=Homo sapiens GN=HSPD1 PE=1 SV=2	CH60_HUMAN	61 055,7	1	1	1	37	0.00149	0.311	NIGAKLVQDVANNTNEEAGDGTTTATVLAR	K	S	0.997	3.79	0.347	3 043,5293
EC_212270_T33Vspike_4_A	60 kDa heat shock protein, mitochondrial OS=Homo sapiens GN=HSPD1 PE=1 SV=2	CH60_HUMAN	61 055,7	1	1	1	37	0.00149	0.311	RGVMLAVDAVIAELKK	R	Q	0.997	4.72	0.513	1 713,0093
EC_212270_T33Vspike_4_A	60 kDa heat shock protein, mitochondrial OS=Homo sapiens GN=HSPD1 PE=1 SV=2	CH60_HUMAN	61 055,7	1	1	1	37	0.00149	0.311	SIAKEGFEKISK	R	G	0.96	2.74	0.416	1 336,7472
EC_212270_T33Vspike_4_A	60 kDa heat shock protein, mitochondrial OS=Homo sapiens GN=HSPD1 PE=1 SV=2	CH60_HUMAN	61 055,7	1	1	1	37	0.00149	0.311	TLKIPAMTIAK	R	N	0.997	3.54	0.395	1 186,7230
EC_212270_T33Vspike_4_A	60 kDa heat shock protein, mitochondrial OS=Homo sapiens GN=HSPD1 PE=1 SV=2	CH60_HUMAN	61 055,7	1	1	1	37	0.00149	0.311	TLKIPAMTIAKNAGVEGSLIVEK	R	I	0.942	2.88	0.338	2 383,3632
EC_212270_T33Vspike_4_A	60 kDa heat shock protein, mitochondrial OS=Homo sapiens GN=HSPD1 PE=1 SV=2	CH60_HUMAN	61 055,7	1	1	1	37	0.00149	0.311	TVIIEQSWGSPK	R	V	0.997	3.48	0.357	1 344,7159
EC_212270_T33Vspike_4_A	60 kDa heat shock protein, mitochondrial OS=Homo sapiens GN=HSPD1 PE=1 SV=2	CH60_HUMAN	61 055,7	1	1	1	37	0.00149	0.311	TVIIEQSWGSPKVTK	R	D	0.997	3.7	0.381	1 672,9270
EC_212270_T33Vspike_4_A	60 kDa heat shock protein, mitochondrial OS=Homo sapiens GN=HSPD1 PE=1 SV=2	CH60_HUMAN	61 055,7	1	1	1	37	0.00149	0.311	VTDALNATRAAVEEGIVLGGGCALLR	R	C	0.926	2.73	0.288	2 626,3984
EC_212270_T33Vspike_4_B	60 kDa heat shock protein, mitochondrial OS=Homo sapiens GN=HSPD1 PE=1 SV=2	CH60_HUMAN	61 055,7	1	1	2	37	0.00147	0.281	AAVEEGIVLGGGCALLR	R	C	0.997	4.17	0.395	1 684,9053
EC_212270_T33Vspike_4_B	60 kDa heat shock protein, mitochondrial OS=Homo sapiens GN=HSPD1 PE=1 SV=2	CH60_HUMAN	61 055,7	1	1	2	37	0.00147	0.281	ALMLQGVDLLADAVAVTMGPK	R	G	0.997	4.99	0.507	2 129,1349
EC_212270_T33Vspike_4_B	60 kDa heat shock protein, mitochondrial OS=Homo sapiens GN=HSPD1 PE=1 SV=2	CH60_HUMAN	61 055,7	1	1	2	37	0.00147	0.281	ALMLQGVDLLADAVAVTMGPKGR	R	T	0.997	4.04	0.508	2 326,2625
EC_212270_T33Vspike_4_B	60 kDa heat shock protein, mitochondrial OS=Homo sapiens GN=HSPD1 PE=1 SV=2	CH60_HUMAN	61 055,7	1	1	2	37	0.00147	0.281	GVMLAVDAVIAELKK	R	Q	0.997	4.73	0.434	1 556,9082
EC_212270_T33Vspike_4_B	60 kDa heat shock protein, mitochondrial OS=Homo sapiens GN=HSPD1 PE=1 SV=2	CH60_HUMAN	61 055,7	1	1	2	37	0.00147	0.281	IMQSSSEVGYDAMAGDFVNMVEKGIIDPTKVVR	K	T	0.997	4.43	0.474	3 586,7593
EC_212270_T33Vspike_4_B	60 kDa heat shock protein, mitochondrial OS=Homo sapiens GN=HSPD1 PE=1 SV=2	CH60_HUMAN	61 055,7	1	1	2	37	0.00147	0.281	LVQDVANNTNEEAGDGTTTATVLAR	K	S	0.975	3.17	0.381	2 560,2487
EC_212270_T33Vspike_4_B	60 kDa heat shock protein, mitochondrial OS=Homo sapiens GN=HSPD1 PE=1 SV=2	CH60_HUMAN	61 055,7	1	1	2	37	0.00147	0.281	NAGVEGSLIVEK	K	I	0.979	3.27	0.272	1 215,6580
EC_212270_T33Vspike_4_B	60 kDa heat shock protein, mitochondrial OS=Homo sapiens GN=HSPD1 PE=1 SV=2	CH60_HUMAN	61 055,7	1	1	2	37	0.00147	0.281	RGVMLAVDAVIAELKK	R	Q	0.997	4.87	0.549	1 713,0093
EC_212270_T33Vspike_4_B	60 kDa heat shock protein, mitochondrial OS=Homo sapiens GN=HSPD1 PE=1 SV=2	CH60_HUMAN	61 055,7	1	1	2	37	0.00147	0.281	TLKIPAMTIAK	R	N	0.997	3.73	0.397	1 186,7230
EC_212270_T33Vspike_4_B	60 kDa heat shock protein, mitochondrial OS=Homo sapiens GN=HSPD1 PE=1 SV=2	CH60_HUMAN	61 055,7	1	1	2	37	0.00147	0.281	TLKIPAMTIAKNAGVEGSLIVEK	R	I	0.976	3.2	0.321	2 383,3632
EC_212270_T33Vspike_4_B	60 kDa heat shock protein, mitochondrial OS=Homo sapiens GN=HSPD1 PE=1 SV=2	CH60_HUMAN	61 055,7	1	1	2	37	0.00147	0.281	TVIIEQSWGSPK	R	V	0.997	3.88	0.496	1 344,7159
EC_212270_T33Vspike_4_B	60 kDa heat shock protein, mitochondrial OS=Homo sapiens GN=HSPD1 PE=1 SV=2	CH60_HUMAN	61 055,7	1	1	2	37	0.00147	0.281	TVIIEQSWGSPKVTK	R	D	0.991	3.62	0.384	1 672,9270
EC_212270_T33Vspike_4_B	60 kDa heat shock protein, mitochondrial OS=Homo sapiens GN=HSPD1 PE=1 SV=2	CH60_HUMAN	61 055,7	1	1	2	37	0.00147	0.281	VTDALNATRAAVEEGIVLGGGCALLR	R	C	0.997	3.64	0.354	2 626,3984
EC_212270_T33Vspike_5_A	60 kDa heat shock protein, mitochondrial OS=Homo sapiens GN=HSPD1 PE=1 SV=2	CH60_HUMAN	61 055,7	1	2	3	54	0.00228	0.387	AAVEEGIVLGGGCALLR	R	C	0.997	3.93	0.436	1 684,9053
EC_212270_T33Vspike_5_A	60 kDa heat shock protein, mitochondrial OS=Homo sapiens GN=HSPD1 PE=1 SV=2	CH60_HUMAN	61 055,7	1	2	3	54	0.00228	0.387	ALMLQGVDLLADAVAVTMGPK	R	G	0.997	5.02	0.543	2 129,1349
EC_212270_T33Vspike_5_A	60 kDa heat shock protein, mitochondrial OS=Homo sapiens GN=HSPD1 PE=1 SV=2	CH60_HUMAN	61 055,7	1	2	3	54	0.00228	0.387	ALMLQGVDLLADAVAVTMGPKGR	R	T	0.997	3.83	0.574	2 326,2625
EC_212270_T33Vspike_5_A	60 kDa heat shock protein, mitochondrial OS=Homo sapiens GN=HSPD1 PE=1 SV=2	CH60_HUMAN	61 055,7	1	2	3	54	0.00228	0.387	GRTVIIEQSWGSPK	K	V	0.965	2.79	0.329	1 557,8385
EC_212270_T33Vspike_5_A	60 kDa heat shock protein, mitochondrial OS=Homo sapiens GN=HSPD1 PE=1 SV=2	CH60_HUMAN	61 055,7	1	2	3	54	0.00228	0.387	GRTVIIEQSWGSPKVTK	K	D	0.96	3.46	0.299	1 886,0496
EC_212270_T33Vspike_5_A	60 kDa heat shock protein, mitochondrial OS=Homo sapiens GN=HSPD1 PE=1 SV=2	CH60_HUMAN	61 055,7	1	2	3	54	0.00228	0.387	GVMLAVDAVIAELKK	R	Q	0.997	4.51	0.389	1 556,9082
EC_212270_T33Vspike_5_A	60 kDa heat shock protein, mitochondrial OS=Homo sapiens GN=HSPD1 PE=1 SV=2	CH60_HUMAN	61 055,7	1	2	3	54	0.00228	0.387	IMQSSSEVGYDAMAGDFVNMVEK	K	G	0.997	4.55	0.4	2 508,1092
EC_212270_T33Vspike_5_A	60 kDa heat shock protein, mitochondrial OS=Homo sapiens GN=HSPD1 PE=1 SV=2	CH60_HUMAN	61 055,7	1	2	3	54	0.00228	0.387	IMQSSSEVGYDAMAGDFVNMVEKGIIDPTKVVR	K	T	0.997	3.57	0.409	3 586,7593
EC_212270_T33Vspike_5_A	60 kDa heat shock protein, mitochondrial OS=Homo sapiens GN=HSPD1 PE=1 SV=2	CH60_HUMAN	61 055,7	1	2	3	54	0.00228	0.387	LSDGVAVLK	K	V	0.966	2.51	0.298	901.535
EC_212270_T33Vspike_5_A	60 kDa heat shock protein, mitochondrial OS=Homo sapiens GN=HSPD1 PE=1 SV=2	CH60_HUMAN	61 055,7	1	2	3	54	0.00228	0.387	LVQDVANNTNEEAGDGTTTATVLAR	K	S	0.997	4.79	0.371	2 560,2487
EC_212270_T33Vspike_5_A	60 kDa heat shock protein, mitochondrial OS=Homo sapiens GN=HSPD1 PE=1 SV=2	CH60_HUMAN	61 055,7	1	2	3	54	0.00228	0.387	NAGVEGSLIVEK	K	I	0.997	3.36	0.396	1 215,6580
EC_212270_T33Vspike_5_A	60 kDa heat shock protein, mitochondrial OS=Homo sapiens GN=HSPD1 PE=1 SV=2	CH60_HUMAN	61 055,7	1	2	3	54	0.00228	0.387	NIGAKLVQDVANNTNEEAGDGTTTATVLAR	K	S	0.928	2.54	0.31	3 043,5293
EC_212270_T33Vspike_5_A	60 kDa heat shock protein, mitochondrial OS=Homo sapiens GN=HSPD1 PE=1 SV=2	CH60_HUMAN	61 055,7	1	2	3	54	0.00228	0.387	QSKPVTTPEEIAQVATISANGDKEIGNIISDAMKK	K	V	0.992	4.1	0.277	3 683,9165
EC_212270_T33Vspike_5_A	60 kDa heat shock protein, mitochondrial OS=Homo sapiens GN=HSPD1 PE=1 SV=2	CH60_HUMAN	61 055,7	1	2	3	54	0.00228	0.387	RGVMLAVDAVIAELKK	R	Q	0.997	6.07	0.532	1 713,0093
EC_212270_T33Vspike_5_A	60 kDa heat shock protein, mitochondrial OS=Homo sapiens GN=HSPD1 PE=1 SV=2	CH60_HUMAN	61 055,7	1	2	3	54	0.00228	0.387	SIAKEGFEKISK	R	G	0.89	2.59	0.314	1 336,7472
EC_212270_T33Vspike_5_A	60 kDa heat shock protein, mitochondrial OS=Homo sapiens GN=HSPD1 PE=1 SV=2	CH60_HUMAN	61 055,7	1	2	3	54	0.00228	0.387	TLKIPAMTIAK	R	N	0.997	3.54	0.449	1 186,7230
EC_212270_T33Vspike_5_A	60 kDa heat shock protein, mitochondrial OS=Homo sapiens GN=HSPD1 PE=1 SV=2	CH60_HUMAN	61 055,7	1	2	3	54	0.00228	0.387	TLKIPAMTIAKNAGVEGSLIVEK	R	I	0.997	3.23	0.514	2 383,3632
EC_212270_T33Vspike_5_A	60 kDa heat shock protein, mitochondrial OS=Homo sapiens GN=HSPD1 PE=1 SV=2	CH60_HUMAN	61 055,7	1	2	3	54	0.00228	0.387	TVIIEQSWGSPK	R	V	0.997	3.36	0.378	1 344,7159
EC_212270_T33Vspike_5_A	60 kDa heat shock protein, mitochondrial OS=Homo sapiens GN=HSPD1 PE=1 SV=2	CH60_HUMAN	61 055,7	1	2	3	54	0.00228	0.387	TVIIEQSWGSPKVTK	R	D	0.997	3.3	0.425	1 672,9270
EC_212270_T33Vspike_5_A	60 kDa heat shock protein, mitochondrial OS=Homo sapiens GN=HSPD1 PE=1 SV=2	CH60_HUMAN	61 055,7	1	2	3	54	0.00228	0.387	VTDALNATRAAVEEGIVLGGGCALLR	R	C	0.997	4.05	0.251	2 626,3984
EC_212270_T33Vspike_5_B	60 kDa heat shock protein, mitochondrial OS=Homo sapiens GN=HSPD1 PE=1 SV=2	CH60_HUMAN	61 055,7	1	3	5	46	0.00235	0.419	AAVEEGIVLGGGCALLR	R	C	0.997	4.69	0.422	1 627,8838
EC_212270_T33Vspike_5_B	60 kDa heat shock protein, mitochondrial OS=Homo sapiens GN=HSPD1 PE=1 SV=2	CH60_HUMAN	61 055,7	1	3	5	46	0.00235	0.419	ALMLQGVDLLADAVAVTMGPK	R	G	0.997	4.79	0.531	2 113,1399
EC_212270_T33Vspike_5_B	60 kDa heat shock protein, mitochondrial OS=Homo sapiens GN=HSPD1 PE=1 SV=2	CH60_HUMAN	61 055,7	1	3	5	46	0.00235	0.419	ALMLQGVDLLADAVAVTMGPKGR	R	T	0.997	3.8	0.451	2 326,2625
EC_212270_T33Vspike_5_B	60 kDa heat shock protein, mitochondrial OS=Homo sapiens GN=HSPD1 PE=1 SV=2	CH60_HUMAN	61 055,7	1	3	5	46	0.00235	0.419	IMQSSSEVGYDAMAGDFVNMVEK	K	G	0.997	3.65	0.357	2 508,1092
EC_212270_T33Vspike_5_B	60 kDa heat shock protein, mitochondrial OS=Homo sapiens GN=HSPD1 PE=1 SV=2	CH60_HUMAN	61 055,7	1	3	5	46	0.00235	0.419	IMQSSSEVGYDAMAGDFVNMVEKGIIDPTKVVR	K	T	0.927	3.11	0.207	3 586,7593
EC_212270_T33Vspike_5_B	60 kDa heat shock protein, mitochondrial OS=Homo sapiens GN=HSPD1 PE=1 SV=2	CH60_HUMAN	61 055,7	1	3	5	46	0.00235	0.419	IQEIIEQLDVTTSEYEKEKLNER	R	L	0.997	3.74	0.374	2 807,4312
EC_212270_T33Vspike_5_B	60 kDa heat shock protein, mitochondrial OS=Homo sapiens GN=HSPD1 PE=1 SV=2	CH60_HUMAN	61 055,7	1	3	5	46	0.00235	0.419	LVQDVANNTNEEAGDGTTTATVLAR	K	S	0.987	3.39	0.356	2 560,2487
EC_212270_T33Vspike_5_B	60 kDa heat shock protein, mitochondrial OS=Homo sapiens GN=HSPD1 PE=1 SV=2	CH60_HUMAN	61 055,7	1	3	5	46	0.00235	0.419	NAGVEGSLIVEK	K	I	0.997	3.31	0.35	1 215,6580
EC_212270_T33Vspike_5_B	60 kDa heat shock protein, mitochondrial OS=Homo sapiens GN=HSPD1 PE=1 SV=2	CH60_HUMAN	61 055,7	1	3	5	46	0.00235	0.419	QSKPVTTPEEIAQVATISANGDKEIGNIISDAMKK	K	V	0.992	3.49	0.332	3 683,9165
EC_212270_T33Vspike_5_B	60 kDa heat shock protein, mitochondrial OS=Homo sapiens GN=HSPD1 PE=1 SV=2	CH60_HUMAN	61 055,7	1	3	5	46	0.00235	0.419	RGVMLAVDAVIAELKK	R	Q	0.997	5.2	0.517	1 713,0093
EC_212270_T33Vspike_5_B	60 kDa heat shock protein, mitochondrial OS=Homo sapiens GN=HSPD1 PE=1 SV=2	CH60_HUMAN	61 055,7	1	3	5	46	0.00235	0.419	SIAKEGFEKISK	R	G	0.997	3.48	0.286	1 336,7472
EC_212270_T33Vspike_5_B	60 kDa heat shock protein, mitochondrial OS=Homo sapiens GN=HSPD1 PE=1 SV=2	CH60_HUMAN	61 055,7	1	3	5	46	0.00235	0.419	SIDLKDKYK	K	N	0.904	2.4	0.301	1 109,6203
EC_212270_T33Vspike_5_B	60 kDa heat shock protein, mitochondrial OS=Homo sapiens GN=HSPD1 PE=1 SV=2	CH60_HUMAN	61 055,7	1	3	5	46	0.00235	0.419	TLKIPAMTIAK	R	N	0.997	3.29	0.385	1 186,7230
EC_212270_T33Vspike_5_B	60 kDa heat shock protein, mitochondrial OS=Homo sapiens GN=HSPD1 PE=1 SV=2	CH60_HUMAN	61 055,7	1	3	5	46	0.00235	0.419	TLKIPAMTIAKNAGVEGSLIVEK	R	I	0.997	3.36	0.401	2 383,3632
EC_212270_T33Vspike_5_B	60 kDa heat shock protein, mitochondrial OS=Homo sapiens GN=HSPD1 PE=1 SV=2	CH60_HUMAN	61 055,7	1	3	5	46	0.00235	0.419	TVIIEQSWGSPK	R	V	0.997	3.6	0.382	1 344,7159
EC_212270_T33Vspike_5_B	60 kDa heat shock protein, mitochondrial OS=Homo sapiens GN=HSPD1 PE=1 SV=2	CH60_HUMAN	61 055,7	1	3	5	46	0.00235	0.419	TVIIEQSWGSPKVTK	R	D	0.997	3.19	0.438	1 672,9270
EC_212270_T33Vspike_5_B	60 kDa heat shock protein, mitochondrial OS=Homo sapiens GN=HSPD1 PE=1 SV=2	CH60_HUMAN	61 055,7	1	3	5	46	0.00235	0.419	VTDALNATRAAVEEGIVLGGGCALLR	R	C	0.898	2.94	0.248	2 626,3984
EC_212270_T33Vspike_6_A	60 kDa heat shock protein, mitochondrial OS=Homo sapiens GN=HSPD1 PE=1 SV=2	CH60_HUMAN	61 055,7	1	4	5	30	0.00166	0.26	AAVEEGIVLGGGCALLR	R	C	0.997	5.24	0.466	1 627,8838
EC_212270_T33Vspike_6_A	60 kDa heat shock protein, mitochondrial OS=Homo sapiens GN=HSPD1 PE=1 SV=2	CH60_HUMAN	61 055,7	1	4	5	30	0.00166	0.26	ALMLQGVDLLADAVAVTMGPK	R	G	0.997	4.03	0.559	2 129,1349
EC_212270_T33Vspike_6_A	60 kDa heat shock protein, mitochondrial OS=Homo sapiens GN=HSPD1 PE=1 SV=2	CH60_HUMAN	61 055,7	1	4	5	30	0.00166	0.26	ALMLQGVDLLADAVAVTMGPKGR	R	T	0.997	3.92	0.605	2 326,2625
EC_212270_T33Vspike_6_A	60 kDa heat shock protein, mitochondrial OS=Homo sapiens GN=HSPD1 PE=1 SV=2	CH60_HUMAN	61 055,7	1	4	5	30	0.00166	0.26	GVMLAVDAVIAELKK	R	Q	0.997	4.44	0.465	1 556,9082
EC_212270_T33Vspike_6_A	60 kDa heat shock protein, mitochondrial OS=Homo sapiens GN=HSPD1 PE=1 SV=2	CH60_HUMAN	61 055,7	1	4	5	30	0.00166	0.26	IMQSSSEVGYDAMAGDFVNMVEK	K	G	0.997	3.47	0.576	2 508,1092
EC_212270_T33Vspike_6_A	60 kDa heat shock protein, mitochondrial OS=Homo sapiens GN=HSPD1 PE=1 SV=2	CH60_HUMAN	61 055,7	1	4	5	30	0.00166	0.26	NAGVEGSLIVEK	K	I	0.997	3.41	0.338	1 215,6580
EC_212270_T33Vspike_6_A	60 kDa heat shock protein, mitochondrial OS=Homo sapiens GN=HSPD1 PE=1 SV=2	CH60_HUMAN	61 055,7	1	4	5	30	0.00166	0.26	QSKPVTTPEEIAQVATISANGDKEIGNIISDAMKK	K	V	0.997	3.34	0.376	3 683,9165
EC_212270_T33Vspike_6_A	60 kDa heat shock protein, mitochondrial OS=Homo sapiens GN=HSPD1 PE=1 SV=2	CH60_HUMAN	61 055,7	1	4	5	30	0.00166	0.26	RGVMLAVDAVIAELKK	R	Q	0.997	4.99	0.537	1 713,0093
EC_212270_T33Vspike_6_A	60 kDa heat shock protein, mitochondrial OS=Homo sapiens GN=HSPD1 PE=1 SV=2	CH60_HUMAN	61 055,7	1	4	5	30	0.00166	0.26	TLKIPAMTIAK	R	N	0.997	3.58	0.454	1 186,7230
EC_212270_T33Vspike_6_A	60 kDa heat shock protein, mitochondrial OS=Homo sapiens GN=HSPD1 PE=1 SV=2	CH60_HUMAN	61 055,7	1	4	5	30	0.00166	0.26	TLKIPAMTIAKNAGVEGSLIVEK	R	I	0.997	3.18	0.567	2 383,3632
EC_212270_T33Vspike_6_A	60 kDa heat shock protein, mitochondrial OS=Homo sapiens GN=HSPD1 PE=1 SV=2	CH60_HUMAN	61 055,7	1	4	5	30	0.00166	0.26	TVIIEQSWGSPK	R	V	0.997	3.76	0.435	1 344,7159
EC_212270_T33Vspike_6_B	60 kDa heat shock protein, mitochondrial OS=Homo sapiens GN=HSPD1 PE=1 SV=2	CH60_HUMAN	61 055,7	1	4	4	29	0.00174	0.276	AAVEEGIVLGGGCALLR	R	C	0.997	5.34	0.469	1 627,8838
EC_212270_T33Vspike_6_B	60 kDa heat shock protein, mitochondrial OS=Homo sapiens GN=HSPD1 PE=1 SV=2	CH60_HUMAN	61 055,7	1	4	4	29	0.00174	0.276	ALMLQGVDLLADAVAVTMGPK	R	G	0.997	5.23	0.591	2 129,1349
EC_212270_T33Vspike_6_B	60 kDa heat shock protein, mitochondrial OS=Homo sapiens GN=HSPD1 PE=1 SV=2	CH60_HUMAN	61 055,7	1	4	4	29	0.00174	0.276	ALMLQGVDLLADAVAVTMGPKGR	R	T	0.997	3.13	0.54	2 326,2625
EC_212270_T33Vspike_6_B	60 kDa heat shock protein, mitochondrial OS=Homo sapiens GN=HSPD1 PE=1 SV=2	CH60_HUMAN	61 055,7	1	4	4	29	0.00174	0.276	GVMLAVDAVIAELKK	R	Q	0.997	4.34	0.445	1 556,9082
EC_212270_T33Vspike_6_B	60 kDa heat shock protein, mitochondrial OS=Homo sapiens GN=HSPD1 PE=1 SV=2	CH60_HUMAN	61 055,7	1	4	4	29	0.00174	0.276	IMQSSSEVGYDAMAGDFVNMVEK	K	G	0.98	2.43	0.523	2 508,1092
EC_212270_T33Vspike_6_B	60 kDa heat shock protein, mitochondrial OS=Homo sapiens GN=HSPD1 PE=1 SV=2	CH60_HUMAN	61 055,7	1	4	4	29	0.00174	0.276	LSDGVAVLK	K	V	0.968	2.48	0.312	901.535
EC_212270_T33Vspike_6_B	60 kDa heat shock protein, mitochondrial OS=Homo sapiens GN=HSPD1 PE=1 SV=2	CH60_HUMAN	61 055,7	1	4	4	29	0.00174	0.276	NAGVEGSLIVEK	K	I	0.997	3.24	0.321	1 215,6580
EC_212270_T33Vspike_6_B	60 kDa heat shock protein, mitochondrial OS=Homo sapiens GN=HSPD1 PE=1 SV=2	CH60_HUMAN	61 055,7	1	4	4	29	0.00174	0.276	QSKPVTTPEEIAQVATISANGDKEIGNIISDAMKK	K	V	0.997	3.36	0.216	3 683,9165
EC_212270_T33Vspike_6_B	60 kDa heat shock protein, mitochondrial OS=Homo sapiens GN=HSPD1 PE=1 SV=2	CH60_HUMAN	61 055,7	1	4	4	29	0.00174	0.276	RGVMLAVDAVIAELKK	R	Q	0.997	4.72	0.583	1 713,0093
EC_212270_T33Vspike_6_B	60 kDa heat shock protein, mitochondrial OS=Homo sapiens GN=HSPD1 PE=1 SV=2	CH60_HUMAN	61 055,7	1	4	4	29	0.00174	0.276	TLKIPAMTIAK	R	N	0.997	2.97	0.391	1 186,7230
EC_212270_T33Vspike_6_B	60 kDa heat shock protein, mitochondrial OS=Homo sapiens GN=HSPD1 PE=1 SV=2	CH60_HUMAN	61 055,7	1	4	4	29	0.00174	0.276	TLKIPAMTIAKNAGVEGSLIVEK	R	I	0.997	3.06	0.473	2 383,3632
EC_212270_T33Vspike_6_B	60 kDa heat shock protein, mitochondrial OS=Homo sapiens GN=HSPD1 PE=1 SV=2	CH60_HUMAN	61 055,7	1	4	4	29	0.00174	0.276	TVIIEQSWGSPK	R	V	0.997	4.05	0.428	1 344,7159
EC_212270_T33Vspike_7_A	60 kDa heat shock protein, mitochondrial OS=Homo sapiens GN=HSPD1 PE=1 SV=2	CH60_HUMAN	61 055,7	1	7	9	60	0.00271	0.469	AAVEEGIVLGGGCALLR	R	C	0.997	4.02	0.422	1 684,9053
EC_212270_T33Vspike_7_A	60 kDa heat shock protein, mitochondrial OS=Homo sapiens GN=HSPD1 PE=1 SV=2	CH60_HUMAN	61 055,7	1	7	9	60	0.00271	0.469	ALMLQGVDLLADAVAVTMGPK	R	G	0.997	5.09	0.601	2 129,1349
EC_212270_T33Vspike_7_A	60 kDa heat shock protein, mitochondrial OS=Homo sapiens GN=HSPD1 PE=1 SV=2	CH60_HUMAN	61 055,7	1	7	9	60	0.00271	0.469	ALMLQGVDLLADAVAVTMGPKGR	R	T	0.997	4.59	0.558	2 326,2625
EC_212270_T33Vspike_7_A	60 kDa heat shock protein, mitochondrial OS=Homo sapiens GN=HSPD1 PE=1 SV=2	CH60_HUMAN	61 055,7	1	7	9	60	0.00271	0.469	CIPALDSLTPANEDQKIGIEIIKR	R	T	0.907	2.71	0.346	2 694,4500
EC_212270_T33Vspike_7_A	60 kDa heat shock protein, mitochondrial OS=Homo sapiens GN=HSPD1 PE=1 SV=2	CH60_HUMAN	61 055,7	1	7	9	60	0.00271	0.469	GRTVIIEQSWGSPK	K	V	0.841	2.39	0.292	1 557,8385
EC_212270_T33Vspike_7_A	60 kDa heat shock protein, mitochondrial OS=Homo sapiens GN=HSPD1 PE=1 SV=2	CH60_HUMAN	61 055,7	1	7	9	60	0.00271	0.469	GRTVIIEQSWGSPKVTK	K	D	0.997	3.49	0.372	1 886,0496
EC_212270_T33Vspike_7_A	60 kDa heat shock protein, mitochondrial OS=Homo sapiens GN=HSPD1 PE=1 SV=2	CH60_HUMAN	61 055,7	1	7	9	60	0.00271	0.469	GYISPYFINTSK	R	G	0.723	2.46	0.00332	1 389,7049
EC_212270_T33Vspike_7_A	60 kDa heat shock protein, mitochondrial OS=Homo sapiens GN=HSPD1 PE=1 SV=2	CH60_HUMAN	61 055,7	1	7	9	60	0.00271	0.469	IMQSSSEVGYDAMAGDFVNMVEK	K	G	0.922	2.99	0.508	2 508,1092
EC_212270_T33Vspike_7_A	60 kDa heat shock protein, mitochondrial OS=Homo sapiens GN=HSPD1 PE=1 SV=2	CH60_HUMAN	61 055,7	1	7	9	60	0.00271	0.469	IMQSSSEVGYDAMAGDFVNMVEKGIIDPTKVVR	K	T	0.911	2.84	0.287	3 586,7593
EC_212270_T33Vspike_7_A	60 kDa heat shock protein, mitochondrial OS=Homo sapiens GN=HSPD1 PE=1 SV=2	CH60_HUMAN	61 055,7	1	7	9	60	0.00271	0.469	IQEIIEQLDVTTSEYEK	R	E	0.997	3.78	0.471	2 038,0229
EC_212270_T33Vspike_7_A	60 kDa heat shock protein, mitochondrial OS=Homo sapiens GN=HSPD1 PE=1 SV=2	CH60_HUMAN	61 055,7	1	7	9	60	0.00271	0.469	LVQDVANNTNEEAGDGTTTATVLAR	K	S	0.997	4.43	0.496	2 560,2487
EC_212270_T33Vspike_7_A	60 kDa heat shock protein, mitochondrial OS=Homo sapiens GN=HSPD1 PE=1 SV=2	CH60_HUMAN	61 055,7	1	7	9	60	0.00271	0.469	NAGVEGSLIVEK	K	I	0.997	3.71	0.348	1 215,6580
EC_212270_T33Vspike_7_A	60 kDa heat shock protein, mitochondrial OS=Homo sapiens GN=HSPD1 PE=1 SV=2	CH60_HUMAN	61 055,7	1	7	9	60	0.00271	0.469	QSKPVTTPEEIAQVATISANGDKEIGNIISDAMKK	K	V	0.997	3.78	0.381	3 683,9165
EC_212270_T33Vspike_7_A	60 kDa heat shock protein, mitochondrial OS=Homo sapiens GN=HSPD1 PE=1 SV=2	CH60_HUMAN	61 055,7	1	7	9	60	0.00271	0.469	RGVMLAVDAVIAELKK	R	Q	0.997	5.29	0.526	1 713,0093
EC_212270_T33Vspike_7_A	60 kDa heat shock protein, mitochondrial OS=Homo sapiens GN=HSPD1 PE=1 SV=2	CH60_HUMAN	61 055,7	1	7	9	60	0.00271	0.469	TLKIPAMTIAK	R	N	0.997	3.33	0.422	1 186,7230
EC_212270_T33Vspike_7_A	60 kDa heat shock protein, mitochondrial OS=Homo sapiens GN=HSPD1 PE=1 SV=2	CH60_HUMAN	61 055,7	1	7	9	60	0.00271	0.469	TLKIPAMTIAKNAGVEGSLIVEK	R	I	0.997	3.85	0.437	2 383,3632
EC_212270_T33Vspike_7_A	60 kDa heat shock protein, mitochondrial OS=Homo sapiens GN=HSPD1 PE=1 SV=2	CH60_HUMAN	61 055,7	1	7	9	60	0.00271	0.469	TLNDELEIIEGMK	K	F	0.997	3.34	0.504	1 504,7566
EC_212270_T33Vspike_7_A	60 kDa heat shock protein, mitochondrial OS=Homo sapiens GN=HSPD1 PE=1 SV=2	CH60_HUMAN	61 055,7	1	7	9	60	0.00271	0.469	TVIIEQSWGSPK	R	V	0.997	3.81	0.405	1 344,7159
EC_212270_T33Vspike_7_A	60 kDa heat shock protein, mitochondrial OS=Homo sapiens GN=HSPD1 PE=1 SV=2	CH60_HUMAN	61 055,7	1	7	9	60	0.00271	0.469	TVIIEQSWGSPKVTK	R	D	0.997	3.2	0.398	1 672,9270
EC_212270_T33Vspike_7_A	60 kDa heat shock protein, mitochondrial OS=Homo sapiens GN=HSPD1 PE=1 SV=2	CH60_HUMAN	61 055,7	1	7	9	60	0.00271	0.469	TVIIEQSWGSPKVTKDGVTVAK	R	S	0.958	2.99	0.335	2 343,2921
EC_212270_T33Vspike_7_A	60 kDa heat shock protein, mitochondrial OS=Homo sapiens GN=HSPD1 PE=1 SV=2	CH60_HUMAN	61 055,7	1	7	9	60	0.00271	0.469	VTDALNATR	R	A	0.965	2.38	0.145	960.511
EC_212270_T33Vspike_7_A	60 kDa heat shock protein, mitochondrial OS=Homo sapiens GN=HSPD1 PE=1 SV=2	CH60_HUMAN	61 055,7	1	7	9	60	0.00271	0.469	VTDALNATRAAVEEGIVLGGGCALLR	R	C	0.997	3.54	0.221	2 626,3984
EC_212270_T33Vspike_7_B	60 kDa heat shock protein, mitochondrial OS=Homo sapiens GN=HSPD1 PE=1 SV=2	CH60_HUMAN	61 055,7	1	6	9	54	0.00245	0.462	AAVEEGIVLGGGCALLR	R	C	0.997	4.41	0.382	1 684,9053
EC_212270_T33Vspike_7_B	60 kDa heat shock protein, mitochondrial OS=Homo sapiens GN=HSPD1 PE=1 SV=2	CH60_HUMAN	61 055,7	1	6	9	54	0.00245	0.462	ALMLQGVDLLADAVAVTMGPK	R	G	0.997	4.9	0.586	2 113,1399
EC_212270_T33Vspike_7_B	60 kDa heat shock protein, mitochondrial OS=Homo sapiens GN=HSPD1 PE=1 SV=2	CH60_HUMAN	61 055,7	1	6	9	54	0.00245	0.462	ALMLQGVDLLADAVAVTMGPKGR	R	T	0.997	4.68	0.513	2 326,2625
EC_212270_T33Vspike_7_B	60 kDa heat shock protein, mitochondrial OS=Homo sapiens GN=HSPD1 PE=1 SV=2	CH60_HUMAN	61 055,7	1	6	9	54	0.00245	0.462	CIPALDSLTPANEDQKIGIEIIKR	R	T	0.804	2.32	0.282	2 694,4500
EC_212270_T33Vspike_7_B	60 kDa heat shock protein, mitochondrial OS=Homo sapiens GN=HSPD1 PE=1 SV=2	CH60_HUMAN	61 055,7	1	6	9	54	0.00245	0.462	GIIDPTKVVR	K	T	0.785	2.47	0.2	1 097,6679
EC_212270_T33Vspike_7_B	60 kDa heat shock protein, mitochondrial OS=Homo sapiens GN=HSPD1 PE=1 SV=2	CH60_HUMAN	61 055,7	1	6	9	54	0.00245	0.462	GRTVIIEQSWGSPKVTK	K	D	0.904	3.02	0.311	1 886,0496
EC_212270_T33Vspike_7_B	60 kDa heat shock protein, mitochondrial OS=Homo sapiens GN=HSPD1 PE=1 SV=2	CH60_HUMAN	61 055,7	1	6	9	54	0.00245	0.462	IMQSSSEVGYDAMAGDFVNMVEK	K	G	0.986	3.07	0.525	2 508,1092
EC_212270_T33Vspike_7_B	60 kDa heat shock protein, mitochondrial OS=Homo sapiens GN=HSPD1 PE=1 SV=2	CH60_HUMAN	61 055,7	1	6	9	54	0.00245	0.462	IMQSSSEVGYDAMAGDFVNMVEKGIIDPTKVVR	K	T	0.957	2.9	0.342	3 586,7593
EC_212270_T33Vspike_7_B	60 kDa heat shock protein, mitochondrial OS=Homo sapiens GN=HSPD1 PE=1 SV=2	CH60_HUMAN	61 055,7	1	6	9	54	0.00245	0.462	ISKGANPVEIR	K	R	0.908	2.47	0.278	1 183,6794
EC_212270_T33Vspike_7_B	60 kDa heat shock protein, mitochondrial OS=Homo sapiens GN=HSPD1 PE=1 SV=2	CH60_HUMAN	61 055,7	1	6	9	54	0.00245	0.462	LVQDVANNTNEEAGDGTTTATVLAR	K	S	0.997	4.17	0.45	2 560,2487
EC_212270_T33Vspike_7_B	60 kDa heat shock protein, mitochondrial OS=Homo sapiens GN=HSPD1 PE=1 SV=2	CH60_HUMAN	61 055,7	1	6	9	54	0.00245	0.462	NAGVEGSLIVEK	K	I	0.997	3.26	0.327	1 215,6580
EC_212270_T33Vspike_7_B	60 kDa heat shock protein, mitochondrial OS=Homo sapiens GN=HSPD1 PE=1 SV=2	CH60_HUMAN	61 055,7	1	6	9	54	0.00245	0.462	NIGAKLVQDVANNTNEEAGDGTTTATVLAR	K	S	0.761	2.59	0.216	3 043,5293
EC_212270_T33Vspike_7_B	60 kDa heat shock protein, mitochondrial OS=Homo sapiens GN=HSPD1 PE=1 SV=2	CH60_HUMAN	61 055,7	1	6	9	54	0.00245	0.462	QSKPVTTPEEIAQVATISANGDKEIGNIISDAMKK	K	V	0.971	3.22	0.252	3 683,9165
EC_212270_T33Vspike_7_B	60 kDa heat shock protein, mitochondrial OS=Homo sapiens GN=HSPD1 PE=1 SV=2	CH60_HUMAN	61 055,7	1	6	9	54	0.00245	0.462	RGVMLAVDAVIAELKK	R	Q	0.997	5.97	0.54	1 713,0093
EC_212270_T33Vspike_7_B	60 kDa heat shock protein, mitochondrial OS=Homo sapiens GN=HSPD1 PE=1 SV=2	CH60_HUMAN	61 055,7	1	6	9	54	0.00245	0.462	SIAKEGFEKISK	R	G	0.962	2.94	0.301	1 336,7472
EC_212270_T33Vspike_7_B	60 kDa heat shock protein, mitochondrial OS=Homo sapiens GN=HSPD1 PE=1 SV=2	CH60_HUMAN	61 055,7	1	6	9	54	0.00245	0.462	TLKIPAMTIAK	R	N	0.997	3.71	0.427	1 186,7230
EC_212270_T33Vspike_7_B	60 kDa heat shock protein, mitochondrial OS=Homo sapiens GN=HSPD1 PE=1 SV=2	CH60_HUMAN	61 055,7	1	6	9	54	0.00245	0.462	TLKIPAMTIAKNAGVEGSLIVEK	R	I	0.997	3.82	0.398	2 383,3632
EC_212270_T33Vspike_7_B	60 kDa heat shock protein, mitochondrial OS=Homo sapiens GN=HSPD1 PE=1 SV=2	CH60_HUMAN	61 055,7	1	6	9	54	0.00245	0.462	TLNDELEIIEGMK	K	F	0.997	3.61	0.497	1 504,7566
EC_212270_T33Vspike_7_B	60 kDa heat shock protein, mitochondrial OS=Homo sapiens GN=HSPD1 PE=1 SV=2	CH60_HUMAN	61 055,7	1	6	9	54	0.00245	0.462	TVIIEQSWGSPK	R	V	0.997	3.34	0.45	1 344,7159
EC_212270_T33Vspike_7_B	60 kDa heat shock protein, mitochondrial OS=Homo sapiens GN=HSPD1 PE=1 SV=2	CH60_HUMAN	61 055,7	1	6	9	54	0.00245	0.462	TVIIEQSWGSPKVTK	R	D	0.971	3.07	0.387	1 672,9270
EC_212270_T33Vspike_7_B	60 kDa heat shock protein, mitochondrial OS=Homo sapiens GN=HSPD1 PE=1 SV=2	CH60_HUMAN	61 055,7	1	6	9	54	0.00245	0.462	TVIIEQSWGSPKVTKDGVTVAK	R	S	0.922	2.45	0.167	2 343,2921
EC_212270_T33Vspike_7_B	60 kDa heat shock protein, mitochondrial OS=Homo sapiens GN=HSPD1 PE=1 SV=2	CH60_HUMAN	61 055,7	1	6	9	54	0.00245	0.462	VTDALNATRAAVEEGIVLGGGCALLR	R	C	0.961	3.69	0.231	2 626,3984
EC_212270_T33Vspike_8_A	60 kDa heat shock protein, mitochondrial OS=Homo sapiens GN=HSPD1 PE=1 SV=2	CH60_HUMAN	61 055,7	1	6	8	43	0.00202	0.302	AAVEEGIVLGGGCALLR	R	C	0.997	5.06	0.471	1 684,9053
EC_212270_T33Vspike_8_A	60 kDa heat shock protein, mitochondrial OS=Homo sapiens GN=HSPD1 PE=1 SV=2	CH60_HUMAN	61 055,7	1	6	8	43	0.00202	0.302	ALMLQGVDLLADAVAVTMGPK	R	G	0.997	5.24	0.475	2 113,1399
EC_212270_T33Vspike_8_A	60 kDa heat shock protein, mitochondrial OS=Homo sapiens GN=HSPD1 PE=1 SV=2	CH60_HUMAN	61 055,7	1	6	8	43	0.00202	0.302	ALMLQGVDLLADAVAVTMGPKGR	R	T	0.997	4.7	0.585	2 326,2625
EC_212270_T33Vspike_8_A	60 kDa heat shock protein, mitochondrial OS=Homo sapiens GN=HSPD1 PE=1 SV=2	CH60_HUMAN	61 055,7	1	6	8	43	0.00202	0.302	GRTVIIEQSWGSPKVTK	K	D	0.915	2.77	0.128	1 886,0496
EC_212270_T33Vspike_8_A	60 kDa heat shock protein, mitochondrial OS=Homo sapiens GN=HSPD1 PE=1 SV=2	CH60_HUMAN	61 055,7	1	6	8	43	0.00202	0.302	GVMLAVDAVIAELKK	R	Q	0.997	4.45	0.474	1 556,9082
EC_212270_T33Vspike_8_A	60 kDa heat shock protein, mitochondrial OS=Homo sapiens GN=HSPD1 PE=1 SV=2	CH60_HUMAN	61 055,7	1	6	8	43	0.00202	0.302	GYISPYFINTSK	R	G	0.865	2.67	0.0625	1 389,7049
EC_212270_T33Vspike_8_A	60 kDa heat shock protein, mitochondrial OS=Homo sapiens GN=HSPD1 PE=1 SV=2	CH60_HUMAN	61 055,7	1	6	8	43	0.00202	0.302	IMQSSSEVGYDAMAGDFVNMVEKGIIDPTKVVR	K	T	0.997	4.14	0.49	3 586,7593
EC_212270_T33Vspike_8_A	60 kDa heat shock protein, mitochondrial OS=Homo sapiens GN=HSPD1 PE=1 SV=2	CH60_HUMAN	61 055,7	1	6	8	43	0.00202	0.302	LVQDVANNTNEEAGDGTTTATVLAR	K	S	0.982	3.25	0.386	2 560,2487
EC_212270_T33Vspike_8_A	60 kDa heat shock protein, mitochondrial OS=Homo sapiens GN=HSPD1 PE=1 SV=2	CH60_HUMAN	61 055,7	1	6	8	43	0.00202	0.302	NAGVEGSLIVEK	K	I	0.997	3.25	0.45	1 215,6580
EC_212270_T33Vspike_8_A	60 kDa heat shock protein, mitochondrial OS=Homo sapiens GN=HSPD1 PE=1 SV=2	CH60_HUMAN	61 055,7	1	6	8	43	0.00202	0.302	RGVMLAVDAVIAELKK	R	Q	0.997	6.18	0.546	1 713,0093
EC_212270_T33Vspike_8_A	60 kDa heat shock protein, mitochondrial OS=Homo sapiens GN=HSPD1 PE=1 SV=2	CH60_HUMAN	61 055,7	1	6	8	43	0.00202	0.302	TLKIPAMTIAK	R	N	0.997	4.01	0.373	1 186,7230
EC_212270_T33Vspike_8_A	60 kDa heat shock protein, mitochondrial OS=Homo sapiens GN=HSPD1 PE=1 SV=2	CH60_HUMAN	61 055,7	1	6	8	43	0.00202	0.302	TVIIEQSWGSPK	R	V	0.997	3.8	0.451	1 344,7159
EC_212270_T33Vspike_8_A	60 kDa heat shock protein, mitochondrial OS=Homo sapiens GN=HSPD1 PE=1 SV=2	CH60_HUMAN	61 055,7	1	6	8	43	0.00202	0.302	TVIIEQSWGSPKVTK	R	D	0.906	2.46	0.262	1 672,9270
EC_212270_T33Vspike_8_A	60 kDa heat shock protein, mitochondrial OS=Homo sapiens GN=HSPD1 PE=1 SV=2	CH60_HUMAN	61 055,7	1	6	8	43	0.00202	0.302	VTDALNATR	R	A	0.864	1.93	0.171	960.511
EC_212270_T33Vspike_8_A	60 kDa heat shock protein, mitochondrial OS=Homo sapiens GN=HSPD1 PE=1 SV=2	CH60_HUMAN	61 055,7	1	6	8	43	0.00202	0.302	VTDALNATRAAVEEGIVLGGGCALLR	R	C	0.997	3.78	0.373	2 626,3984
EC_212270_T33Vspike_8_B	60 kDa heat shock protein, mitochondrial OS=Homo sapiens GN=HSPD1 PE=1 SV=2	CH60_HUMAN	61 055,7	1	5	7	45	0.00216	0.253	AAVEEGIVLGGGCALLR	R	C	0.997	4.46	0.395	1 627,8838
EC_212270_T33Vspike_8_B	60 kDa heat shock protein, mitochondrial OS=Homo sapiens GN=HSPD1 PE=1 SV=2	CH60_HUMAN	61 055,7	1	5	7	45	0.00216	0.253	ALMLQGVDLLADAVAVTMGPK	R	G	0.997	5.19	0.502	2 129,1349
EC_212270_T33Vspike_8_B	60 kDa heat shock protein, mitochondrial OS=Homo sapiens GN=HSPD1 PE=1 SV=2	CH60_HUMAN	61 055,7	1	5	7	45	0.00216	0.253	ALMLQGVDLLADAVAVTMGPKGR	R	T	0.997	4.01	0.539	2 326,2625
EC_212270_T33Vspike_8_B	60 kDa heat shock protein, mitochondrial OS=Homo sapiens GN=HSPD1 PE=1 SV=2	CH60_HUMAN	61 055,7	1	5	7	45	0.00216	0.253	GRTVIIEQSWGSPKVTK	K	D	0.997	3.78	0.389	1 886,0496
EC_212270_T33Vspike_8_B	60 kDa heat shock protein, mitochondrial OS=Homo sapiens GN=HSPD1 PE=1 SV=2	CH60_HUMAN	61 055,7	1	5	7	45	0.00216	0.253	GVMLAVDAVIAELKK	R	Q	0.997	4.17	0.415	1 556,9082
EC_212270_T33Vspike_8_B	60 kDa heat shock protein, mitochondrial OS=Homo sapiens GN=HSPD1 PE=1 SV=2	CH60_HUMAN	61 055,7	1	5	7	45	0.00216	0.253	IMQSSSEVGYDAMAGDFVNMVEKGIIDPTKVVR	K	T	0.987	3.21	0.394	3 586,7593
EC_212270_T33Vspike_8_B	60 kDa heat shock protein, mitochondrial OS=Homo sapiens GN=HSPD1 PE=1 SV=2	CH60_HUMAN	61 055,7	1	5	7	45	0.00216	0.253	LSDGVAVLK	K	V	0.957	2.59	0.245	901.535
EC_212270_T33Vspike_8_B	60 kDa heat shock protein, mitochondrial OS=Homo sapiens GN=HSPD1 PE=1 SV=2	CH60_HUMAN	61 055,7	1	5	7	45	0.00216	0.253	NAGVEGSLIVEK	K	I	0.997	3.66	0.373	1 215,6580
EC_212270_T33Vspike_8_B	60 kDa heat shock protein, mitochondrial OS=Homo sapiens GN=HSPD1 PE=1 SV=2	CH60_HUMAN	61 055,7	1	5	7	45	0.00216	0.253	RGVMLAVDAVIAELKK	R	Q	0.997	5.29	0.538	1 713,0093
EC_212270_T33Vspike_8_B	60 kDa heat shock protein, mitochondrial OS=Homo sapiens GN=HSPD1 PE=1 SV=2	CH60_HUMAN	61 055,7	1	5	7	45	0.00216	0.253	TLKIPAMTIAK	R	N	0.997	3.5	0.336	1 186,7230
EC_212270_T33Vspike_8_B	60 kDa heat shock protein, mitochondrial OS=Homo sapiens GN=HSPD1 PE=1 SV=2	CH60_HUMAN	61 055,7	1	5	7	45	0.00216	0.253	TVIIEQSWGSPK	R	V	0.997	3.35	0.397	1 344,7159
EC_212270_T33Vspike_8_B	60 kDa heat shock protein, mitochondrial OS=Homo sapiens GN=HSPD1 PE=1 SV=2	CH60_HUMAN	61 055,7	1	5	7	45	0.00216	0.253	TVIIEQSWGSPKVTK	R	D	0.992	3.02	0.487	1 672,9270
EC_212270_T33Vspike_8_B	60 kDa heat shock protein, mitochondrial OS=Homo sapiens GN=HSPD1 PE=1 SV=2	CH60_HUMAN	61 055,7	1	5	7	45	0.00216	0.253	VTDALNATRAAVEEGIVLGGGCALLR	R	C	0.861	2.74	0.185	2 626,3984
EC_212270_T33Vspike_9_A	60 kDa heat shock protein, mitochondrial OS=Homo sapiens GN=HSPD1 PE=1 SV=2	CH60_HUMAN	61 055,7	1	6	9	33	0.0016	0.293	AAVEEGIVLGGGCALLR	R	C	0.997	5.32	0.503	1 684,9053
EC_212270_T33Vspike_9_A	60 kDa heat shock protein, mitochondrial OS=Homo sapiens GN=HSPD1 PE=1 SV=2	CH60_HUMAN	61 055,7	1	6	9	33	0.0016	0.293	ALMLQGVDLLADAVAVTMGPK	R	G	0.997	5.31	0.587	2 129,1349
EC_212270_T33Vspike_9_A	60 kDa heat shock protein, mitochondrial OS=Homo sapiens GN=HSPD1 PE=1 SV=2	CH60_HUMAN	61 055,7	1	6	9	33	0.0016	0.293	ALMLQGVDLLADAVAVTMGPKGR	R	T	0.997	4.51	0.599	2 326,2625
EC_212270_T33Vspike_9_A	60 kDa heat shock protein, mitochondrial OS=Homo sapiens GN=HSPD1 PE=1 SV=2	CH60_HUMAN	61 055,7	1	6	9	33	0.0016	0.293	GVMLAVDAVIAELKK	R	Q	0.997	4.32	0.429	1 556,9082
EC_212270_T33Vspike_9_A	60 kDa heat shock protein, mitochondrial OS=Homo sapiens GN=HSPD1 PE=1 SV=2	CH60_HUMAN	61 055,7	1	6	9	33	0.0016	0.293	IMQSSSEVGYDAMAGDFVNMVEKGIIDPTK	K	V	0.9	2.73	0.264	3 232,5214
EC_212270_T33Vspike_9_A	60 kDa heat shock protein, mitochondrial OS=Homo sapiens GN=HSPD1 PE=1 SV=2	CH60_HUMAN	61 055,7	1	6	9	33	0.0016	0.293	IMQSSSEVGYDAMAGDFVNMVEKGIIDPTKVVR	K	T	0.959	3.18	0.269	3 586,7593
EC_212270_T33Vspike_9_A	60 kDa heat shock protein, mitochondrial OS=Homo sapiens GN=HSPD1 PE=1 SV=2	CH60_HUMAN	61 055,7	1	6	9	33	0.0016	0.293	NAGVEGSLIVEK	K	I	0.997	3.23	0.338	1 215,6580
EC_212270_T33Vspike_9_A	60 kDa heat shock protein, mitochondrial OS=Homo sapiens GN=HSPD1 PE=1 SV=2	CH60_HUMAN	61 055,7	1	6	9	33	0.0016	0.293	QSKPVTTPEEIAQVATISANGDKEIGNIISDAMKK	K	V	0.941	3.23	0.155	3 683,9165
EC_212270_T33Vspike_9_A	60 kDa heat shock protein, mitochondrial OS=Homo sapiens GN=HSPD1 PE=1 SV=2	CH60_HUMAN	61 055,7	1	6	9	33	0.0016	0.293	RGVMLAVDAVIAELKK	R	Q	0.997	5.46	0.537	1 713,0093
EC_212270_T33Vspike_9_A	60 kDa heat shock protein, mitochondrial OS=Homo sapiens GN=HSPD1 PE=1 SV=2	CH60_HUMAN	61 055,7	1	6	9	33	0.0016	0.293	TLKIPAMTIAK	R	N	0.997	3.43	0.396	1 186,7230
EC_212270_T33Vspike_9_A	60 kDa heat shock protein, mitochondrial OS=Homo sapiens GN=HSPD1 PE=1 SV=2	CH60_HUMAN	61 055,7	1	6	9	33	0.0016	0.293	TLKIPAMTIAKNAGVEGSLIVEK	R	I	0.945	2.93	0.192	2 383,3632
EC_212270_T33Vspike_9_A	60 kDa heat shock protein, mitochondrial OS=Homo sapiens GN=HSPD1 PE=1 SV=2	CH60_HUMAN	61 055,7	1	6	9	33	0.0016	0.293	TVIIEQSWGSPK	R	V	0.997	3.36	0.377	1 344,7159
EC_212270_T33Vspike_9_A	60 kDa heat shock protein, mitochondrial OS=Homo sapiens GN=HSPD1 PE=1 SV=2	CH60_HUMAN	61 055,7	1	6	9	33	0.0016	0.293	VTDALNATRAAVEEGIVLGGGCALLR	R	C	0.997	3.78	0.355	2 626,3984
EC_212270_T33Vspike_9_B	60 kDa heat shock protein, mitochondrial OS=Homo sapiens GN=HSPD1 PE=1 SV=2	CH60_HUMAN	61 055,7	1	2	4	29	0.0015	0.164	AAVEEGIVLGGGCALLR	R	C	0.997	4.82	0.496	1 684,9053
EC_212270_T33Vspike_9_B	60 kDa heat shock protein, mitochondrial OS=Homo sapiens GN=HSPD1 PE=1 SV=2	CH60_HUMAN	61 055,7	1	2	4	29	0.0015	0.164	ALMLQGVDLLADAVAVTMGPK	R	G	0.997	4.99	0.596	2 113,1399
EC_212270_T33Vspike_9_B	60 kDa heat shock protein, mitochondrial OS=Homo sapiens GN=HSPD1 PE=1 SV=2	CH60_HUMAN	61 055,7	1	2	4	29	0.0015	0.164	ALMLQGVDLLADAVAVTMGPKGR	R	T	0.997	4.29	0.586	2 326,2625
EC_212270_T33Vspike_9_B	60 kDa heat shock protein, mitochondrial OS=Homo sapiens GN=HSPD1 PE=1 SV=2	CH60_HUMAN	61 055,7	1	2	4	29	0.0015	0.164	NAGVEGSLIVEK	K	I	0.997	3.66	0.411	1 215,6580
EC_212270_T33Vspike_9_B	60 kDa heat shock protein, mitochondrial OS=Homo sapiens GN=HSPD1 PE=1 SV=2	CH60_HUMAN	61 055,7	1	2	4	29	0.0015	0.164	RGVMLAVDAVIAELKK	R	Q	0.997	4.91	0.499	1 713,0093
EC_212270_T33Vspike_9_B	60 kDa heat shock protein, mitochondrial OS=Homo sapiens GN=HSPD1 PE=1 SV=2	CH60_HUMAN	61 055,7	1	2	4	29	0.0015	0.164	TLKIPAMTIAK	R	N	0.997	3.41	0.435	1 186,7230
EC_212270_T33Vspike_9_B	60 kDa heat shock protein, mitochondrial OS=Homo sapiens GN=HSPD1 PE=1 SV=2	CH60_HUMAN	61 055,7	1	2	4	29	0.0015	0.164	TVIIEQSWGSPK	R	V	0.997	3.83	0.456	1 344,7159
EC_212270_T33Vspike_9_B	60 kDa heat shock protein, mitochondrial OS=Homo sapiens GN=HSPD1 PE=1 SV=2	CH60_HUMAN	61 055,7	1	2	4	29	0.0015	0.164	TVIIEQSWGSPKVTK	R	D	0.952	2.24	0.447	1 672,9270
EC_212270_T33Vspike_10_A	60 kDa heat shock protein, mitochondrial OS=Homo sapiens GN=HSPD1 PE=1 SV=2	CH60_HUMAN	61 055,7	1	4	6	35	0.0019	0.236	AAVEEGIVLGGGCALLR	R	C	0.997	5.35	0.482	1 684,9053
EC_212270_T33Vspike_10_A	60 kDa heat shock protein, mitochondrial OS=Homo sapiens GN=HSPD1 PE=1 SV=2	CH60_HUMAN	61 055,7	1	4	6	35	0.0019	0.236	ALMLQGVDLLADAVAVTMGPK	R	G	0.997	4.94	0.462	2 113,1399
EC_212270_T33Vspike_10_A	60 kDa heat shock protein, mitochondrial OS=Homo sapiens GN=HSPD1 PE=1 SV=2	CH60_HUMAN	61 055,7	1	4	6	35	0.0019	0.236	ALMLQGVDLLADAVAVTMGPKGR	R	T	0.997	3.03	0.482	2 326,2625
EC_212270_T33Vspike_10_A	60 kDa heat shock protein, mitochondrial OS=Homo sapiens GN=HSPD1 PE=1 SV=2	CH60_HUMAN	61 055,7	1	4	6	35	0.0019	0.236	GYISPYFINTSK	R	G	0.841	2.26	0.0474	1 389,7049
EC_212270_T33Vspike_10_A	60 kDa heat shock protein, mitochondrial OS=Homo sapiens GN=HSPD1 PE=1 SV=2	CH60_HUMAN	61 055,7	1	4	6	35	0.0019	0.236	IQEIIEQLDVTTSEYEKEKLNER	R	L	0.824	2.84	0.0315	2 807,4312
EC_212270_T33Vspike_10_A	60 kDa heat shock protein, mitochondrial OS=Homo sapiens GN=HSPD1 PE=1 SV=2	CH60_HUMAN	61 055,7	1	4	6	35	0.0019	0.236	LSDGVAVLK	K	V	0.876	2.35	0.299	901.535
EC_212270_T33Vspike_10_A	60 kDa heat shock protein, mitochondrial OS=Homo sapiens GN=HSPD1 PE=1 SV=2	CH60_HUMAN	61 055,7	1	4	6	35	0.0019	0.236	RGVMLAVDAVIAELKK	R	Q	0.997	5.01	0.501	1 713,0093
EC_212270_T33Vspike_10_A	60 kDa heat shock protein, mitochondrial OS=Homo sapiens GN=HSPD1 PE=1 SV=2	CH60_HUMAN	61 055,7	1	4	6	35	0.0019	0.236	TLKIPAMTIAK	R	N	0.997	3.56	0.424	1 186,7230
EC_212270_T33Vspike_10_A	60 kDa heat shock protein, mitochondrial OS=Homo sapiens GN=HSPD1 PE=1 SV=2	CH60_HUMAN	61 055,7	1	4	6	35	0.0019	0.236	TVIIEQSWGSPK	R	V	0.997	3.44	0.394	1 344,7159
EC_212270_T33Vspike_10_A	60 kDa heat shock protein, mitochondrial OS=Homo sapiens GN=HSPD1 PE=1 SV=2	CH60_HUMAN	61 055,7	1	4	6	35	0.0019	0.236	TVIIEQSWGSPKVTK	R	D	0.988	3.05	0.359	1 672,9270
EC_212270_T33Vspike_10_A	60 kDa heat shock protein, mitochondrial OS=Homo sapiens GN=HSPD1 PE=1 SV=2	CH60_HUMAN	61 055,7	1	4	6	35	0.0019	0.236	VTDALNATRAAVEEGIVLGGGCALLR	R	C	0.897	2.69	0.197	2 626,3984
EC_212270_T33Vspike_10_B	60 kDa heat shock protein, mitochondrial OS=Homo sapiens GN=HSPD1 PE=1 SV=2	CH60_HUMAN	61 055,7	1	5	7	33	0.00175	0.321	AAVEEGIVLGGGCALLR	R	C	0.997	4.56	0.491	1 684,9053
EC_212270_T33Vspike_10_B	60 kDa heat shock protein, mitochondrial OS=Homo sapiens GN=HSPD1 PE=1 SV=2	CH60_HUMAN	61 055,7	1	5	7	33	0.00175	0.321	ALMLQGVDLLADAVAVTMGPK	R	G	0.997	4.75	0.476	2 129,1349
EC_212270_T33Vspike_10_B	60 kDa heat shock protein, mitochondrial OS=Homo sapiens GN=HSPD1 PE=1 SV=2	CH60_HUMAN	61 055,7	1	5	7	33	0.00175	0.321	ALMLQGVDLLADAVAVTMGPKGR	R	T	0.997	3.4	0.517	2 326,2625
EC_212270_T33Vspike_10_B	60 kDa heat shock protein, mitochondrial OS=Homo sapiens GN=HSPD1 PE=1 SV=2	CH60_HUMAN	61 055,7	1	5	7	33	0.00175	0.321	IMQSSSEVGYDAMAGDFVNMVEK	K	G	0.814	2.6	0.115	2 508,1092
EC_212270_T33Vspike_10_B	60 kDa heat shock protein, mitochondrial OS=Homo sapiens GN=HSPD1 PE=1 SV=2	CH60_HUMAN	61 055,7	1	5	7	33	0.00175	0.321	IQEIIEQLDVTTSEYEKEKLNER	R	L	0.997	3.28	0.175	2 807,4312
EC_212270_T33Vspike_10_B	60 kDa heat shock protein, mitochondrial OS=Homo sapiens GN=HSPD1 PE=1 SV=2	CH60_HUMAN	61 055,7	1	5	7	33	0.00175	0.321	NAGVEGSLIVEK	K	I	0.997	3.6	0.423	1 215,6580
EC_212270_T33Vspike_10_B	60 kDa heat shock protein, mitochondrial OS=Homo sapiens GN=HSPD1 PE=1 SV=2	CH60_HUMAN	61 055,7	1	5	7	33	0.00175	0.321	QSKPVTTPEEIAQVATISANGDKEIGNIISDAMKK	K	V	0.996	3.16	0.366	3 683,9165
EC_212270_T33Vspike_10_B	60 kDa heat shock protein, mitochondrial OS=Homo sapiens GN=HSPD1 PE=1 SV=2	CH60_HUMAN	61 055,7	1	5	7	33	0.00175	0.321	RGVMLAVDAVIAELKK	R	Q	0.997	5.38	0.47	1 713,0093
EC_212270_T33Vspike_10_B	60 kDa heat shock protein, mitochondrial OS=Homo sapiens GN=HSPD1 PE=1 SV=2	CH60_HUMAN	61 055,7	1	5	7	33	0.00175	0.321	TLKIPAMTIAK	R	N	0.997	3.17	0.348	1 186,7230
EC_212270_T33Vspike_10_B	60 kDa heat shock protein, mitochondrial OS=Homo sapiens GN=HSPD1 PE=1 SV=2	CH60_HUMAN	61 055,7	1	5	7	33	0.00175	0.321	TVIIEQSWGSPK	R	V	0.997	3.86	0.487	1 344,7159
EC_212270_T33Vspike_10_B	60 kDa heat shock protein, mitochondrial OS=Homo sapiens GN=HSPD1 PE=1 SV=2	CH60_HUMAN	61 055,7	1	5	7	33	0.00175	0.321	TVIIEQSWGSPKVTK	R	D	0.81	2	0.464	1 672,9270
EC_212270_T33Vspike_10_B	60 kDa heat shock protein, mitochondrial OS=Homo sapiens GN=HSPD1 PE=1 SV=2	CH60_HUMAN	61 055,7	1	5	7	33	0.00175	0.321	VTDALNATR	R	A	0.868	2.59	0.199	960.511
EC_212270_T33Vspike_11_A	60 kDa heat shock protein, mitochondrial OS=Homo sapiens GN=HSPD1 PE=1 SV=2	CH60_HUMAN	61 055,7	1	3	3	27	0.00125	0.293	AAVEEGIVLGGGCALLR	R	C	0.997	4.53	0.504	1 684,9053
EC_212270_T33Vspike_11_A	60 kDa heat shock protein, mitochondrial OS=Homo sapiens GN=HSPD1 PE=1 SV=2	CH60_HUMAN	61 055,7	1	3	3	27	0.00125	0.293	ALMLQGVDLLADAVAVTMGPK	R	G	0.997	4.69	0.518	2 113,1399
EC_212270_T33Vspike_11_A	60 kDa heat shock protein, mitochondrial OS=Homo sapiens GN=HSPD1 PE=1 SV=2	CH60_HUMAN	61 055,7	1	3	3	27	0.00125	0.293	ALMLQGVDLLADAVAVTMGPKGR	R	T	0.997	4.23	0.587	2 326,2625
EC_212270_T33Vspike_11_A	60 kDa heat shock protein, mitochondrial OS=Homo sapiens GN=HSPD1 PE=1 SV=2	CH60_HUMAN	61 055,7	1	3	3	27	0.00125	0.293	IMQSSSEVGYDAMAGDFVNMVEK	K	G	0.997	3.77	0.606	2 508,1092
EC_212270_T33Vspike_11_A	60 kDa heat shock protein, mitochondrial OS=Homo sapiens GN=HSPD1 PE=1 SV=2	CH60_HUMAN	61 055,7	1	3	3	27	0.00125	0.293	IMQSSSEVGYDAMAGDFVNMVEKGIIDPTKVVR	K	T	0.997	3.92	0.43	3 586,7593
EC_212270_T33Vspike_11_A	60 kDa heat shock protein, mitochondrial OS=Homo sapiens GN=HSPD1 PE=1 SV=2	CH60_HUMAN	61 055,7	1	3	3	27	0.00125	0.293	NAGVEGSLIVEK	K	I	0.997	3.9	0.415	1 215,6580
EC_212270_T33Vspike_11_A	60 kDa heat shock protein, mitochondrial OS=Homo sapiens GN=HSPD1 PE=1 SV=2	CH60_HUMAN	61 055,7	1	3	3	27	0.00125	0.293	QSKPVTTPEEIAQVATISANGDKEIGNIISDAMKK	K	V	0.997	4.41	0.414	3 683,9165
EC_212270_T33Vspike_11_A	60 kDa heat shock protein, mitochondrial OS=Homo sapiens GN=HSPD1 PE=1 SV=2	CH60_HUMAN	61 055,7	1	3	3	27	0.00125	0.293	RGVMLAVDAVIAELKK	R	Q	0.997	4.89	0.448	1 713,0093
EC_212270_T33Vspike_11_A	60 kDa heat shock protein, mitochondrial OS=Homo sapiens GN=HSPD1 PE=1 SV=2	CH60_HUMAN	61 055,7	1	3	3	27	0.00125	0.293	TLKIPAMTIAK	R	N	0.997	2.94	0.452	1 186,7230
EC_212270_T33Vspike_11_A	60 kDa heat shock protein, mitochondrial OS=Homo sapiens GN=HSPD1 PE=1 SV=2	CH60_HUMAN	61 055,7	1	3	3	27	0.00125	0.293	TVIIEQSWGSPK	R	V	0.997	3.69	0.435	1 344,7159
EC_212270_T33Vspike_11_A	60 kDa heat shock protein, mitochondrial OS=Homo sapiens GN=HSPD1 PE=1 SV=2	CH60_HUMAN	61 055,7	1	3	3	27	0.00125	0.293	VTDALNATRAAVEEGIVLGGGCALLR	R	C	0.997	4.44	0.404	2 626,3984
EC_212270_T33Vspike_11_B	60 kDa heat shock protein, mitochondrial OS=Homo sapiens GN=HSPD1 PE=1 SV=2	CH60_HUMAN	61 055,7	1	2	2	26	0.00121	0.321	AAVEEGIVLGGGCALLR	R	C	0.997	4.75	0.416	1 684,9053
EC_212270_T33Vspike_11_B	60 kDa heat shock protein, mitochondrial OS=Homo sapiens GN=HSPD1 PE=1 SV=2	CH60_HUMAN	61 055,7	1	2	2	26	0.00121	0.321	ALMLQGVDLLADAVAVTMGPK	R	G	0.997	4.78	0.491	2 113,1399
EC_212270_T33Vspike_11_B	60 kDa heat shock protein, mitochondrial OS=Homo sapiens GN=HSPD1 PE=1 SV=2	CH60_HUMAN	61 055,7	1	2	2	26	0.00121	0.321	ALMLQGVDLLADAVAVTMGPKGR	R	T	0.997	3.86	0.585	2 326,2625
EC_212270_T33Vspike_11_B	60 kDa heat shock protein, mitochondrial OS=Homo sapiens GN=HSPD1 PE=1 SV=2	CH60_HUMAN	61 055,7	1	2	2	26	0.00121	0.321	IMQSSSEVGYDAMAGDFVNMVEKGIIDPTKVVR	K	T	0.997	3.62	0.392	3 586,7593
EC_212270_T33Vspike_11_B	60 kDa heat shock protein, mitochondrial OS=Homo sapiens GN=HSPD1 PE=1 SV=2	CH60_HUMAN	61 055,7	1	2	2	26	0.00121	0.321	LVQDVANNTNEEAGDGTTTATVLAR	K	S	0.997	3.74	0.409	2 560,2487
EC_212270_T33Vspike_11_B	60 kDa heat shock protein, mitochondrial OS=Homo sapiens GN=HSPD1 PE=1 SV=2	CH60_HUMAN	61 055,7	1	2	2	26	0.00121	0.321	NAGVEGSLIVEK	K	I	0.997	3.49	0.37	1 215,6580
EC_212270_T33Vspike_11_B	60 kDa heat shock protein, mitochondrial OS=Homo sapiens GN=HSPD1 PE=1 SV=2	CH60_HUMAN	61 055,7	1	2	2	26	0.00121	0.321	QSKPVTTPEEIAQVATISANGDKEIGNIISDAMKK	K	V	0.997	3.76	0.377	3 683,9165
EC_212270_T33Vspike_11_B	60 kDa heat shock protein, mitochondrial OS=Homo sapiens GN=HSPD1 PE=1 SV=2	CH60_HUMAN	61 055,7	1	2	2	26	0.00121	0.321	RGVMLAVDAVIAELKK	R	Q	0.997	5.02	0.489	1 713,0093
EC_212270_T33Vspike_11_B	60 kDa heat shock protein, mitochondrial OS=Homo sapiens GN=HSPD1 PE=1 SV=2	CH60_HUMAN	61 055,7	1	2	2	26	0.00121	0.321	TLKIPAMTIAK	R	N	0.997	3.62	0.417	1 186,7230
EC_212270_T33Vspike_11_B	60 kDa heat shock protein, mitochondrial OS=Homo sapiens GN=HSPD1 PE=1 SV=2	CH60_HUMAN	61 055,7	1	2	2	26	0.00121	0.321	TVIIEQSWGSPK	R	V	0.997	3.94	0.447	1 344,7159
EC_212270_T33Vspike_12_A	60 kDa heat shock protein, mitochondrial OS=Homo sapiens GN=HSPD1 PE=1 SV=2	CH60_HUMAN	61 055,7	1	7	11	48	0.0024	0.375	AAVEEGIVLGGGCALLR	R	C	0.997	4.9	0.514	1 627,8838
EC_212270_T33Vspike_12_A	60 kDa heat shock protein, mitochondrial OS=Homo sapiens GN=HSPD1 PE=1 SV=2	CH60_HUMAN	61 055,7	1	7	11	48	0.0024	0.375	ALMLQGVDLLADAVAVTMGPK	R	G	0.997	4.85	0.509	2 129,1349
EC_212270_T33Vspike_12_A	60 kDa heat shock protein, mitochondrial OS=Homo sapiens GN=HSPD1 PE=1 SV=2	CH60_HUMAN	61 055,7	1	7	11	48	0.0024	0.375	ALMLQGVDLLADAVAVTMGPKGR	R	T	0.686	2.08	0	2 326,2625
EC_212270_T33Vspike_12_A	60 kDa heat shock protein, mitochondrial OS=Homo sapiens GN=HSPD1 PE=1 SV=2	CH60_HUMAN	61 055,7	1	7	11	48	0.0024	0.375	GVMLAVDAVIAELKK	R	Q	0.559	1.61	0	1 556,9082
EC_212270_T33Vspike_12_A	60 kDa heat shock protein, mitochondrial OS=Homo sapiens GN=HSPD1 PE=1 SV=2	CH60_HUMAN	61 055,7	1	7	11	48	0.0024	0.375	IMQSSSEVGYDAMAGDFVNMVEKGIIDPTKVVR	K	T	0.54	3.03	0.229	3 586,7593
EC_212270_T33Vspike_12_A	60 kDa heat shock protein, mitochondrial OS=Homo sapiens GN=HSPD1 PE=1 SV=2	CH60_HUMAN	61 055,7	1	7	11	48	0.0024	0.375	IQEIIEQLDVTTSEYEKEKLNER	R	L	0.415	1.55	-0.0839	2 807,4312
EC_212270_T33Vspike_12_A	60 kDa heat shock protein, mitochondrial OS=Homo sapiens GN=HSPD1 PE=1 SV=2	CH60_HUMAN	61 055,7	1	7	11	48	0.0024	0.375	ISSIQSIVPALEIANAHRKPLVIIAEDVDGEALSTLVLNR	K	L	0.72	2.03	-0.0195	4 265,3871
EC_212270_T33Vspike_12_A	60 kDa heat shock protein, mitochondrial OS=Homo sapiens GN=HSPD1 PE=1 SV=2	CH60_HUMAN	61 055,7	1	7	11	48	0.0024	0.375	LSDGVAVLK	K	V	0.449	2.13	0.173	901.535
EC_212270_T33Vspike_12_A	60 kDa heat shock protein, mitochondrial OS=Homo sapiens GN=HSPD1 PE=1 SV=2	CH60_HUMAN	61 055,7	1	7	11	48	0.0024	0.375	NAGVEGSLIVEK	K	I	0.78	3.56	0.398	1 215,6580
EC_212270_T33Vspike_12_A	60 kDa heat shock protein, mitochondrial OS=Homo sapiens GN=HSPD1 PE=1 SV=2	CH60_HUMAN	61 055,7	1	7	11	48	0.0024	0.375	RGVMLAVDAVIAELKK	R	Q	0.997	4.1	0.446	1 713,0093
EC_212270_T33Vspike_12_A	60 kDa heat shock protein, mitochondrial OS=Homo sapiens GN=HSPD1 PE=1 SV=2	CH60_HUMAN	61 055,7	1	7	11	48	0.0024	0.375	TLKIPAMTIAK	R	N	0.585	1.87	0.0368	1 186,7230
EC_212270_T33Vspike_12_A	60 kDa heat shock protein, mitochondrial OS=Homo sapiens GN=HSPD1 PE=1 SV=2	CH60_HUMAN	61 055,7	1	7	11	48	0.0024	0.375	TVIIEQSWGSPK	R	V	0.997	3.44	0.35	1 344,7159
EC_212270_T33Vspike_12_A	60 kDa heat shock protein, mitochondrial OS=Homo sapiens GN=HSPD1 PE=1 SV=2	CH60_HUMAN	61 055,7	1	7	11	48	0.0024	0.375	TVIIEQSWGSPKVTK	R	D	0.38	1.44	0.0364	1 672,9270
EC_212270_T33Vspike_12_A	60 kDa heat shock protein, mitochondrial OS=Homo sapiens GN=HSPD1 PE=1 SV=2	CH60_HUMAN	61 055,7	1	7	11	48	0.0024	0.375	TVIIEQSWGSPKVTKDGVTVAK	R	S	0.692	1.99	0	2 343,2921
EC_212270_T33Vspike_12_A	60 kDa heat shock protein, mitochondrial OS=Homo sapiens GN=HSPD1 PE=1 SV=2	CH60_HUMAN	61 055,7	1	7	11	48	0.0024	0.375	VTDALNATR	R	A	0.452	2.43	0.15	960.511
EC_212270_T33Vspike_12_A	60 kDa heat shock protein, mitochondrial OS=Homo sapiens GN=HSPD1 PE=1 SV=2	CH60_HUMAN	61 055,7	1	7	11	48	0.0024	0.375	VTDALNATRAAVEEGIVLGGGCALLR	R	C	0.997	3.22	0.164	2 626,3984
EC_212270_T33Vspike_12_B	60 kDa heat shock protein, mitochondrial OS=Homo sapiens GN=HSPD1 PE=1 SV=2	CH60_HUMAN	61 055,7	1	6	10	46	0.00246	0.375	AAVEEGIVLGGGCALLR	R	C	0.997	3.28	0.417	1 684,9053
EC_212270_T33Vspike_12_B	60 kDa heat shock protein, mitochondrial OS=Homo sapiens GN=HSPD1 PE=1 SV=2	CH60_HUMAN	61 055,7	1	6	10	46	0.00246	0.375	ALMLQGVDLLADAVAVTMGPK	R	G	0.997	4.77	0.635	2 113,1399
EC_212270_T33Vspike_12_B	60 kDa heat shock protein, mitochondrial OS=Homo sapiens GN=HSPD1 PE=1 SV=2	CH60_HUMAN	61 055,7	1	6	10	46	0.00246	0.375	ALMLQGVDLLADAVAVTMGPKGR	R	T	0.997	3.58	0.527	2 326,2625
EC_212270_T33Vspike_12_B	60 kDa heat shock protein, mitochondrial OS=Homo sapiens GN=HSPD1 PE=1 SV=2	CH60_HUMAN	61 055,7	1	6	10	46	0.00246	0.375	IMQSSSEVGYDAMAGDFVNMVEKGIIDPTKVVR	K	T	0.997	3.31	0.378	3 586,7593
EC_212270_T33Vspike_12_B	60 kDa heat shock protein, mitochondrial OS=Homo sapiens GN=HSPD1 PE=1 SV=2	CH60_HUMAN	61 055,7	1	6	10	46	0.00246	0.375	IQEIIEQLDVTTSEYEKEKLNER	R	L	0.393	1.96	-0.0304	2 807,4312
EC_212270_T33Vspike_12_B	60 kDa heat shock protein, mitochondrial OS=Homo sapiens GN=HSPD1 PE=1 SV=2	CH60_HUMAN	61 055,7	1	6	10	46	0.00246	0.375	ISSIQSIVPALEIANAHRKPLVIIAEDVDGEALSTLVLNR	K	L	0.283	1.59	-0.151	4 265,3871
EC_212270_T33Vspike_12_B	60 kDa heat shock protein, mitochondrial OS=Homo sapiens GN=HSPD1 PE=1 SV=2	CH60_HUMAN	61 055,7	1	6	10	46	0.00246	0.375	LSDGVAVLK	K	V	0.571	1.83	0.158	901.535
EC_212270_T33Vspike_12_B	60 kDa heat shock protein, mitochondrial OS=Homo sapiens GN=HSPD1 PE=1 SV=2	CH60_HUMAN	61 055,7	1	6	10	46	0.00246	0.375	NAGVEGSLIVEK	K	I	0.997	3.68	0.375	1 215,6580
EC_212270_T33Vspike_12_B	60 kDa heat shock protein, mitochondrial OS=Homo sapiens GN=HSPD1 PE=1 SV=2	CH60_HUMAN	61 055,7	1	6	10	46	0.00246	0.375	RGVMLAVDAVIAELKK	R	Q	0.997	3.81	0.502	1 713,0093
EC_212270_T33Vspike_12_B	60 kDa heat shock protein, mitochondrial OS=Homo sapiens GN=HSPD1 PE=1 SV=2	CH60_HUMAN	61 055,7	1	6	10	46	0.00246	0.375	TLKIPAMTIAK	R	N	0.997	3.29	0.404	1 186,7230
EC_212270_T33Vspike_12_B	60 kDa heat shock protein, mitochondrial OS=Homo sapiens GN=HSPD1 PE=1 SV=2	CH60_HUMAN	61 055,7	1	6	10	46	0.00246	0.375	TVIIEQSWGSPK	R	V	0.997	3.76	0.431	1 344,7159
EC_212270_T33Vspike_12_B	60 kDa heat shock protein, mitochondrial OS=Homo sapiens GN=HSPD1 PE=1 SV=2	CH60_HUMAN	61 055,7	1	6	10	46	0.00246	0.375	TVIIEQSWGSPKVTKDGVTVAK	R	S	0.537	2.09	0.117	2 343,2921
EC_212270_T33Vspike_12_B	60 kDa heat shock protein, mitochondrial OS=Homo sapiens GN=HSPD1 PE=1 SV=2	CH60_HUMAN	61 055,7	1	6	10	46	0.00246	0.375	VTDALNATRAAVEEGIVLGGGCALLR	R	C	0.817	2.77	0.181	2 626,3984
EC_212270_T33Vspike_2_B	Cold-inducible RNA-binding protein OS=Homo sapiens GN=CIRBP PE=1 SV=1	CIRBP_HUMAN	18 648,3	1	2	3	3	0.000131	0.186	SGGYGGSRDYYSSR	R	S	0.837	1.92	0.33	1 511,6509
EC_212270_T33Vspike_2_B	Cold-inducible RNA-binding protein OS=Homo sapiens GN=CIRBP PE=1 SV=1	CIRBP_HUMAN	18 648,3	1	2	3	3	0.000131	0.186	SSGGSYRDSYDSYATHNE	R	-	0.997	3.41	0.607	1 995,7950
EC_212270_T33Vspike_1_A	Uncharacterized protein C12orf43 OS=Homo sapiens GN=C12orf43 PE=1 SV=2	CL043_HUMAN	28 170,6	0.999	2	2	2	8.61e-05	0.145	AGAANSQLSTSQPSLR	R	H	0.983	2.75	0.383	1 587,8085
EC_212270_T33Vspike_1_A	Uncharacterized protein C12orf43 OS=Homo sapiens GN=C12orf43 PE=1 SV=2	CL043_HUMAN	28 170,6	0.999	2	2	2	8.61e-05	0.145	LGALLDSFITISEAAKEPAKAK	K	V	0.969	2.86	0.287	2 273,2754
EC_212270_T33Vspike_1_A	Clathrin light chain A OS=Homo sapiens GN=CLTA PE=1 SV=1	CLCA_HUMAN,CLCA_MOUSE	27 076,7	1	2	3	3	0.000129	0.125	AIKELEEWYARQDEQLQK	K	T	0.991	3.28	0.244	2 277,1512
EC_212270_T33Vspike_1_A	Clathrin light chain A OS=Homo sapiens GN=CLTA PE=1 SV=1	CLCA_HUMAN,CLCA_MOUSE	27 076,7	1	2	3	3	0.000129	0.125	SVLISLKQAPLVH	R	-	0.981	3.23	0.639	1 404,8574
EC_212270_T33Vspike_2_A	Clathrin light chain A OS=Homo sapiens GN=CLTA PE=1 SV=1	CLCA_HUMAN,CLCA_MOUSE	27 076,7	1	2	3	4	0.000167	0.125	AIKELEEWYARQDEQLQK	K	T	0.983	3.08	0.348	2 277,1512
EC_212270_T33Vspike_2_A	Clathrin light chain A OS=Homo sapiens GN=CLTA PE=1 SV=1	CLCA_HUMAN,CLCA_MOUSE	27 076,7	1	2	3	4	0.000167	0.125	SVLISLKQAPLVH	R	-	0.997	3.59	0.642	1 404,8574
EC_212270_T33Vspike_2_B	Clathrin light chain A OS=Homo sapiens GN=CLTA PE=1 SV=1	CLCA_HUMAN,CLCA_MOUSE	27 076,7	1	2	3	3	0.000131	0.125	AIKELEEWYARQDEQLQK	K	T	0.967	3.07	0.281	2 277,1512
EC_212270_T33Vspike_2_B	Clathrin light chain A OS=Homo sapiens GN=CLTA PE=1 SV=1	CLCA_HUMAN,CLCA_MOUSE	27 076,7	1	2	3	3	0.000131	0.125	SVLISLKQAPLVH	R	-	0.989	3.05	0.57	1 404,8574
EC_212270_T33Vspike_3_A	Clathrin light chain A OS=Homo sapiens GN=CLTA PE=1 SV=1	CLCA_HUMAN,CLCA_MOUSE	27 076,7	0.999	2	2	2	0.000101	0.125	AIKELEEWYARQDEQLQK	K	T	0.584	2.38	0.204	2 277,1512
EC_212270_T33Vspike_3_A	Clathrin light chain A OS=Homo sapiens GN=CLTA PE=1 SV=1	CLCA_HUMAN,CLCA_MOUSE	27 076,7	0.999	2	2	2	0.000101	0.125	SVLISLKQAPLVH	R	-	0.997	3.81	0.674	1 404,8574
EC_212270_T33Vspike_3_B	Clathrin light chain A OS=Homo sapiens GN=CLTA PE=1 SV=1	CLCA_HUMAN,CLCA_MOUSE	27 076,7	0.996	2	2	2	0.000105	0.125	AIKELEEWYARQDEQLQK	K	T	0.912	2.89	0.265	2 277,1512
EC_212270_T33Vspike_3_B	Clathrin light chain A OS=Homo sapiens GN=CLTA PE=1 SV=1	CLCA_HUMAN,CLCA_MOUSE	27 076,7	0.996	2	2	2	0.000105	0.125	SVLISLKQAPLVH	R	-	0.956	2.93	0.446	1 404,8574
EC_212270_T33Vspike_7_A	Clathrin light chain A OS=Homo sapiens GN=CLTA PE=1 SV=1	CLCA_HUMAN,CLCA_MOUSE	27 076,7	1	2	4	4	0.000181	0.0605	MRSVLISLKQAPLVH	R	-	0.997	3.08	0.497	1 691,9990
EC_212270_T33Vspike_7_A	Clathrin light chain A OS=Homo sapiens GN=CLTA PE=1 SV=1	CLCA_HUMAN,CLCA_MOUSE	27 076,7	1	2	4	4	0.000181	0.0605	SVLISLKQAPLVH	R	-	0.997	3.19	0.644	1 404,8574
EC_212270_T33Vspike_7_B	Clathrin light chain A OS=Homo sapiens GN=CLTA PE=1 SV=1	CLCA_HUMAN,CLCA_MOUSE	27 076,7	1	2	3	3	0.000136	0.0605	MRSVLISLKQAPLVH	R	-	0.98	3.15	0.338	1 691,9990
EC_212270_T33Vspike_7_B	Clathrin light chain A OS=Homo sapiens GN=CLTA PE=1 SV=1	CLCA_HUMAN,CLCA_MOUSE	27 076,7	1	2	3	3	0.000136	0.0605	SVLISLKQAPLVH	R	-	0.99	2.71	0.561	1 404,8574
EC_212270_T33Vspike_2_A	Cellular nucleic acid-binding protein OS=Bos taurus GN=CNBP PE=2 SV=1	CNBP_BOVIN,CNBP_HUMAN	18 741,3	1	4	4	4	0.000167	0.447	CGESGHLAKDCDLQEDACYNCGR	R	G	0.933	2.35	0.438	2 715,0654
EC_212270_T33Vspike_2_A	Cellular nucleic acid-binding protein OS=Bos taurus GN=CNBP PE=2 SV=1	CNBP_BOVIN,CNBP_HUMAN	18 741,3	1	4	4	4	0.000167	0.447	CGETGHVAINCSK	R	T	0.981	2.82	0.493	1 432,6309
EC_212270_T33Vspike_2_A	Cellular nucleic acid-binding protein OS=Bos taurus GN=CNBP PE=2 SV=1	CNBP_BOVIN,CNBP_HUMAN	18 741,3	1	4	4	4	0.000167	0.447	DCDHADEQKCYSCGEFGHIQKDCTK	R	V	0.955	2.5	0.391	3 088,2293
EC_212270_T33Vspike_2_A	Cellular nucleic acid-binding protein OS=Bos taurus GN=CNBP PE=2 SV=1	CNBP_BOVIN,CNBP_HUMAN	18 741,3	1	4	4	4	0.000167	0.447	GFQFVSSSLPDICYR	R	C	0.981	2.56	0.545	1 718,8207
EC_212270_T33Vspike_2_B	Cellular nucleic acid-binding protein OS=Bos taurus GN=CNBP PE=2 SV=1	CNBP_BOVIN,CNBP_HUMAN	18 741,3	1	4	4	4	0.000174	0.329	CGETGHVAINCSK	R	T	0.97	2.5	0.504	1 432,6309
EC_212270_T33Vspike_2_B	Cellular nucleic acid-binding protein OS=Bos taurus GN=CNBP PE=2 SV=1	CNBP_BOVIN,CNBP_HUMAN	18 741,3	1	4	4	4	0.000174	0.329	CYRCGETGHVAINCSK	K	T	0.903	2.53	0.309	1 911,8259
EC_212270_T33Vspike_2_B	Cellular nucleic acid-binding protein OS=Bos taurus GN=CNBP PE=2 SV=1	CNBP_BOVIN,CNBP_HUMAN	18 741,3	1	4	4	4	0.000174	0.329	DCDHADEQKCYSCGEFGHIQKDCTK	R	V	0.985	3.23	0.374	3 088,2293
EC_212270_T33Vspike_2_B	Cellular nucleic acid-binding protein OS=Bos taurus GN=CNBP PE=2 SV=1	CNBP_BOVIN,CNBP_HUMAN	18 741,3	1	4	4	4	0.000174	0.329	EQCCYNCGKPGHLAR	R	D	0.925	2.49	0.356	1 849,7892
EC_212270_T33Vspike_1_B	Cellular nucleic acid-binding protein OS=Bos taurus GN=CNBP PE=2 SV=1	CNBP_BOVIN,CNBP_HUMAN,CNBP_MOUSE	18 741,3	1	4	4	5	0.000227	0.359	CGETGHVAINCSK	R	T	0.997	3.22	0.473	1 432,6309
EC_212270_T33Vspike_1_B	Cellular nucleic acid-binding protein OS=Bos taurus GN=CNBP PE=2 SV=1	CNBP_BOVIN,CNBP_HUMAN,CNBP_MOUSE	18 741,3	1	4	4	5	0.000227	0.359	DCDHADEQKCYSCGEFGHIQKDCTK	R	V	0.996	2.63	0.374	3 088,2293
EC_212270_T33Vspike_1_B	Cellular nucleic acid-binding protein OS=Bos taurus GN=CNBP PE=2 SV=1	CNBP_BOVIN,CNBP_HUMAN,CNBP_MOUSE	18 741,3	1	4	4	5	0.000227	0.359	GFQFVSSSLPDICYR	R	C	0.99	3.32	0.557	1 775,8422
EC_212270_T33Vspike_1_B	Cellular nucleic acid-binding protein OS=Bos taurus GN=CNBP PE=2 SV=1	CNBP_BOVIN,CNBP_HUMAN,CNBP_MOUSE	18 741,3	1	4	4	5	0.000227	0.359	TSEVNCYR	K	C	0.988	2.32	0.386	1 028,4465
EC_212270_T33Vspike_6_B	Cellular nucleic acid-binding protein OS=Bos taurus GN=CNBP PE=2 SV=1	CNBP_BOVIN,CNBP_HUMAN,CNBP_MOUSE	18 741,3	1	2	2	2	0.00012	0.165	CGETGHVAINCSK	R	T	0.997	2.94	0.423	1 432,6309
EC_212270_T33Vspike_6_B	Cellular nucleic acid-binding protein OS=Bos taurus GN=CNBP PE=2 SV=1	CNBP_BOVIN,CNBP_HUMAN,CNBP_MOUSE	18 741,3	1	2	2	2	0.00012	0.165	GFQFVSSSLPDICYR	R	C	0.944	2.28	0.387	1 775,8422
EC_212270_T33Vspike_7_A	Calponin-3 OS=Bos taurus GN=CNN3 PE=2 SV=1	CNN3_BOVIN,CNN3_HUMAN,CNN3_MOUSE	36 358,5	0.997	3	3	3	0.000136	0.173	AGQSVIGLQMGTNK	K	C	0.895	2.77	0.261	1 403,7313
EC_212270_T33Vspike_7_A	Calponin-3 OS=Bos taurus GN=CNN3 PE=2 SV=1	CNN3_BOVIN,CNN3_HUMAN,CNN3_MOUSE	36 358,5	0.997	3	3	3	0.000136	0.173	GMSVYGLGR	K	Q	0.837	2.16	0.395	939.472
EC_212270_T33Vspike_7_A	Calponin-3 OS=Bos taurus GN=CNN3 PE=2 SV=1	CNN3_BOVIN,CNN3_HUMAN,CNN3_MOUSE	36 358,5	0.997	3	3	3	0.000136	0.173	MQTDKPFDQTTISLQMGTNKGASQAGMLAPGTRR	K	D	0.797	3.07	0.0792	3 637,7889
EC_212270_T33Vspike_7_B	Calponin-3 OS=Bos taurus GN=CNN3 PE=2 SV=1	CNN3_BOVIN,CNN3_HUMAN,CNN3_MOUSE	36 358,5	1	2	2	3	0.000136	0.0699	AGQSVIGLQMGTNK	K	C	0.997	3.33	0.52	1 403,7313
EC_212270_T33Vspike_7_B	Calponin-3 OS=Bos taurus GN=CNN3 PE=2 SV=1	CNN3_BOVIN,CNN3_HUMAN,CNN3_MOUSE	36 358,5	1	2	2	3	0.000136	0.0699	GMSVYGLGR	K	Q	0.953	2.31	0.394	939.472
EC_212270_T33Vspike_1_A	Calponin-3 OS=Bos taurus GN=CNN3 PE=2 SV=1	CNN3_BOVIN,CNN3_HUMAN,CNN3_MOUSE,CNN3_RAT	36 358,5	0.993	2	2	2	8.61e-05	0.0699	AGQSVIGLQMGTNK	K	C	0.84	2.22	0.252	1 403,7313
EC_212270_T33Vspike_1_A	Calponin-3 OS=Bos taurus GN=CNN3 PE=2 SV=1	CNN3_BOVIN,CNN3_HUMAN,CNN3_MOUSE,CNN3_RAT	36 358,5	0.993	2	2	2	8.61e-05	0.0699	GMSVYGLGR	K	Q	0.955	2.46	0.39	939.472
EC_212270_T33Vspike_2_B	Calponin-3 OS=Bos taurus GN=CNN3 PE=2 SV=1	CNN3_BOVIN,CNN3_HUMAN,CNN3_MOUSE,CNN3_RAT	36 435,5	0.999	2	2	2	8.71e-05	0.0699	AGQSVIGLQMGTNK	K	C	0.98	2.88	0.426	1 403,7313
EC_212270_T33Vspike_2_B	Calponin-3 OS=Bos taurus GN=CNN3 PE=2 SV=1	CNN3_BOVIN,CNN3_HUMAN,CNN3_MOUSE,CNN3_RAT	36 435,5	0.999	2	2	2	8.71e-05	0.0699	GMSVYGLGR	K	Q	0.946	2.6	0.357	939.472
EC_212270_T33Vspike_5_A	Calponin-3 OS=Bos taurus GN=CNN3 PE=2 SV=1	CNN3_BOVIN,CNN3_HUMAN,CNN3_MOUSE,CNN3_RAT	36 358,5	1	2	2	2	8.45e-05	0.0699	AGQSVIGLQMGTNK	K	C	0.997	3.5	0.425	1 403,7313
EC_212270_T33Vspike_5_A	Calponin-3 OS=Bos taurus GN=CNN3 PE=2 SV=1	CNN3_BOVIN,CNN3_HUMAN,CNN3_MOUSE,CNN3_RAT	36 358,5	1	2	2	2	8.45e-05	0.0699	GMSVYGLGR	K	Q	0.929	2.6	0.318	939.472
EC_212270_T33Vspike_8_B	Calponin-3 OS=Bos taurus GN=CNN3 PE=2 SV=1	CNN3_BOVIN,CNN3_HUMAN,CNN3_MOUSE,CNN3_RAT	36 358,5	0.996	2	2	2	9.59e-05	0.0699	AGQSVIGLQMGTNK	K	C	0.884	2.58	0.312	1 403,7313
EC_212270_T33Vspike_8_B	Calponin-3 OS=Bos taurus GN=CNN3 PE=2 SV=1	CNN3_BOVIN,CNN3_HUMAN,CNN3_MOUSE,CNN3_RAT	36 358,5	0.996	2	2	2	9.59e-05	0.0699	GMSVYGLGR	K	Q	0.97	2.49	0.468	939.472
EC_212270_T33Vspike_1_A	Protein canopy homolog 2 OS=Homo sapiens GN=CNPY2 PE=1 SV=1	CNPY2_HUMAN	20 652,6	1	3	3	3	0.000129	0.264	ALVDELEWEIAQVDPKK	R	T	0.997	3.17	0.338	1 983,0436
EC_212270_T33Vspike_1_A	Protein canopy homolog 2 OS=Homo sapiens GN=CNPY2 PE=1 SV=1	CNPY2_HUMAN	20 652,6	1	3	3	3	0.000129	0.264	ALVDELEWEIAQVDPKKTIQMGSFR	R	I	0.983	3.28	0.414	2 903,4975
EC_212270_T33Vspike_1_A	Protein canopy homolog 2 OS=Homo sapiens GN=CNPY2 PE=1 SV=1	CNPY2_HUMAN	20 652,6	1	3	3	3	0.000129	0.264	NGESSELDLQGIRIDSDISGTLK	R	F	0.813	2.04	0.205	2 447,2264
EC_212270_T33Vspike_1_B	Protein canopy homolog 2 OS=Homo sapiens GN=CNPY2 PE=1 SV=1	CNPY2_HUMAN	20 652,6	1	2	3	4	0.000182	0.22	ALVDELEWEIAQVDPKKTIQMGSFR	R	I	0.997	3.06	0.385	2 903,4975
EC_212270_T33Vspike_1_B	Protein canopy homolog 2 OS=Homo sapiens GN=CNPY2 PE=1 SV=1	CNPY2_HUMAN	20 652,6	1	2	3	4	0.000182	0.22	SEAHLTELLEEICDR	R	M	0.95	2.75	0.211	1 814,8591
EC_212270_T33Vspike_3_A	Protein canopy homolog 2 OS=Homo sapiens GN=CNPY2 PE=1 SV=1	CNPY2_HUMAN	20 652,6	1	5	5	6	0.000302	0.473	ALVDELEWEIAQVDPK	R	K	0.997	3.21	0.41	1 854,9486
EC_212270_T33Vspike_3_A	Protein canopy homolog 2 OS=Homo sapiens GN=CNPY2 PE=1 SV=1	CNPY2_HUMAN	20 652,6	1	5	5	6	0.000302	0.473	ALVDELEWEIAQVDPKKTIQMGSFR	R	I	0.281	1.77	0.0125	2 903,4975
EC_212270_T33Vspike_3_A	Protein canopy homolog 2 OS=Homo sapiens GN=CNPY2 PE=1 SV=1	CNPY2_HUMAN	20 652,6	1	5	5	6	0.000302	0.473	INPDGSQSVVEVPYAR	R	S	0.692	2.05	0.27	1 730,8708
EC_212270_T33Vspike_3_A	Protein canopy homolog 2 OS=Homo sapiens GN=CNPY2 PE=1 SV=1	CNPY2_HUMAN	20 652,6	1	5	5	6	0.000302	0.473	RTDLCDHALHISHDEL	K	-	0.25	1.95	0	1 931,9031
EC_212270_T33Vspike_3_A	Protein canopy homolog 2 OS=Homo sapiens GN=CNPY2 PE=1 SV=1	CNPY2_HUMAN	20 652,6	1	5	5	6	0.000302	0.473	SEAHLTELLEEICDRMKEYGEQIDPSTHR	R	K	0.345	2.32	0.0574	3 486,6268
EC_212270_T33Vspike_5_A	Protein canopy homolog 2 OS=Homo sapiens GN=CNPY2 PE=1 SV=1	CNPY2_HUMAN	20 652,6	1	3	3	6	0.000254	0.137	ALVDELEWEIAQVDPK	R	K	0.946	2.79	0.211	1 854,9486
EC_212270_T33Vspike_5_A	Protein canopy homolog 2 OS=Homo sapiens GN=CNPY2 PE=1 SV=1	CNPY2_HUMAN	20 652,6	1	3	3	6	0.000254	0.137	ALVDELEWEIAQVDPKK	R	T	0.997	3.44	0.46	1 983,0436
EC_212270_T33Vspike_5_A	Protein canopy homolog 2 OS=Homo sapiens GN=CNPY2 PE=1 SV=1	CNPY2_HUMAN	20 652,6	1	3	3	6	0.000254	0.137	ALVDELEWEIAQVDPKKTIQMGSFR	R	I	0.984	3.01	0.44	2 903,4975
EC_212270_T33Vspike_5_B	Protein canopy homolog 2 OS=Homo sapiens GN=CNPY2 PE=1 SV=1	CNPY2_HUMAN	20 652,6	1	3	3	3	0.000153	0.225	ALVDELEWEIAQVDPK	R	K	0.958	3.05	0.233	1 854,9486
EC_212270_T33Vspike_5_B	Protein canopy homolog 2 OS=Homo sapiens GN=CNPY2 PE=1 SV=1	CNPY2_HUMAN	20 652,6	1	3	3	3	0.000153	0.225	ALVDELEWEIAQVDPKKTIQMGSFR	R	I	0.944	2.54	0.295	2 903,4975
EC_212270_T33Vspike_5_B	Protein canopy homolog 2 OS=Homo sapiens GN=CNPY2 PE=1 SV=1	CNPY2_HUMAN	20 652,6	1	3	3	3	0.000153	0.225	INPDGSQSVVEVPYAR	R	S	0.934	2.49	0.315	1 730,8708
EC_212270_T33Vspike_7_B	Protein canopy homolog 2 OS=Homo sapiens GN=CNPY2 PE=1 SV=1	CNPY2_HUMAN	20 652,6	1	2	2	3	0.000136	0.225	ALVDELEWEIAQVDPKKTIQMGSFR	R	I	0.997	3.35	0.386	2 903,4975
EC_212270_T33Vspike_7_B	Protein canopy homolog 2 OS=Homo sapiens GN=CNPY2 PE=1 SV=1	CNPY2_HUMAN	20 652,6	1	2	2	3	0.000136	0.225	INPDGSQSVVEVPYAR	R	S	0.98	2.66	0.44	1 730,8708
EC_212270_T33Vspike_8_A	Protein canopy homolog 2 OS=Homo sapiens GN=CNPY2 PE=1 SV=1	CNPY2_HUMAN	20 652,6	1	2	2	2	9.39e-05	0.137	ALVDELEWEIAQVDPKK	R	T	0.997	3.81	0.424	1 983,0436
EC_212270_T33Vspike_8_A	Protein canopy homolog 2 OS=Homo sapiens GN=CNPY2 PE=1 SV=1	CNPY2_HUMAN	20 652,6	1	2	2	2	9.39e-05	0.137	ALVDELEWEIAQVDPKKTIQMGSFR	R	I	0.902	2.56	0.245	2 903,4975
EC_212270_T33Vspike_8_B	Protein canopy homolog 2 OS=Homo sapiens GN=CNPY2 PE=1 SV=1	CNPY2_HUMAN	20 652,6	1	2	2	3	0.000144	0.225	ALVDELEWEIAQVDPKKTIQMGSFR	R	I	0.997	3.4	0.443	2 903,4975
EC_212270_T33Vspike_8_B	Protein canopy homolog 2 OS=Homo sapiens GN=CNPY2 PE=1 SV=1	CNPY2_HUMAN	20 652,6	1	2	2	3	0.000144	0.225	INPDGSQSVVEVPYAR	R	S	0.913	2.19	0.36	1 730,8708
EC_212270_T33Vspike_10_A	Protein canopy homolog 2 OS=Homo sapiens GN=CNPY2 PE=1 SV=1	CNPY2_HUMAN	20 652,6	1	2	2	2	0.000108	0.176	ALVDELEWEIAQVDPK	R	K	0.997	2.94	0.355	1 854,9486
EC_212270_T33Vspike_10_A	Protein canopy homolog 2 OS=Homo sapiens GN=CNPY2 PE=1 SV=1	CNPY2_HUMAN	20 652,6	1	2	2	2	0.000108	0.176	INPDGSQSVVEVPYAR	R	S	0.942	2.77	0.341	1 730,8708
EC_212270_T33Vspike_1_A	Cytochrome c oxidase assembly factor 4 homolog, mitochondrial OS=Homo sapiens GN=COA4 PE=1 SV=2	COA4_HUMAN	10 133,3	1	2	2	3	0.000129	0.437	SGCAASHFAVQECMAQHQDWR	R	Q	0.985	3.15	0.568	2 476,0340
EC_212270_T33Vspike_1_A	Cytochrome c oxidase assembly factor 4 homolog, mitochondrial OS=Homo sapiens GN=COA4 PE=1 SV=2	COA4_HUMAN	10 133,3	1	2	2	3	0.000129	0.437	VKKDDEEEDPLDQLISR	R	S	0.997	3.61	0.4	2 029,0088
EC_212270_T33Vspike_1_B	Cytochrome c oxidase assembly factor 4 homolog, mitochondrial OS=Homo sapiens GN=COA4 PE=1 SV=2	COA4_HUMAN	10 133,3	1	2	2	3	0.000136	0.437	SGCAASHFAVQECMAQHQDWR	R	Q	0.987	3.1	0.468	2 476,0340
EC_212270_T33Vspike_1_B	Cytochrome c oxidase assembly factor 4 homolog, mitochondrial OS=Homo sapiens GN=COA4 PE=1 SV=2	COA4_HUMAN	10 133,3	1	2	2	3	0.000136	0.437	VKKDDEEEDPLDQLISR	R	S	0.997	3.51	0.289	2 029,0088
EC_212270_T33Vspike_2_A	Cytochrome c oxidase assembly factor 4 homolog, mitochondrial OS=Homo sapiens GN=COA4 PE=1 SV=2	COA4_HUMAN	10 133,3	1	2	3	4	0.000167	0.437	SGCAASHFAVQECMAQHQDWR	R	Q	0.962	2.58	0.282	2 476,0340
EC_212270_T33Vspike_2_A	Cytochrome c oxidase assembly factor 4 homolog, mitochondrial OS=Homo sapiens GN=COA4 PE=1 SV=2	COA4_HUMAN	10 133,3	1	2	3	4	0.000167	0.437	VKKDDEEEDPLDQLISR	R	S	0.997	3.53	0.319	2 029,0088
EC_212270_T33Vspike_2_B	Cytochrome c oxidase assembly factor 4 homolog, mitochondrial OS=Homo sapiens GN=COA4 PE=1 SV=2	COA4_HUMAN	10 133,3	1	3	4	5	0.000218	0.655	QCQPQVQAFKDCMSEQQAR	R	R	0.902	2.54	0.273	2 339,0328
EC_212270_T33Vspike_2_B	Cytochrome c oxidase assembly factor 4 homolog, mitochondrial OS=Homo sapiens GN=COA4 PE=1 SV=2	COA4_HUMAN	10 133,3	1	3	4	5	0.000218	0.655	SGCAASHFAVQECMAQHQDWR	R	Q	0.942	2.62	0.314	2 476,0340
EC_212270_T33Vspike_2_B	Cytochrome c oxidase assembly factor 4 homolog, mitochondrial OS=Homo sapiens GN=COA4 PE=1 SV=2	COA4_HUMAN	10 133,3	1	3	4	5	0.000218	0.655	VKKDDEEEDPLDQLISR	R	S	0.997	4.02	0.295	2 029,0088
EC_212270_T33Vspike_3_A	Cytochrome c oxidase assembly factor 4 homolog, mitochondrial OS=Homo sapiens GN=COA4 PE=1 SV=2	COA4_HUMAN	10 133,3	1	2	3	6	0.000302	0.437	SGCAASHFAVQECMAQHQDWR	R	Q	0.97	2.8	0.449	2 476,0340
EC_212270_T33Vspike_3_A	Cytochrome c oxidase assembly factor 4 homolog, mitochondrial OS=Homo sapiens GN=COA4 PE=1 SV=2	COA4_HUMAN	10 133,3	1	2	3	6	0.000302	0.437	VKKDDEEEDPLDQLISR	R	S	0.987	3.21	0.371	2 029,0088
EC_212270_T33Vspike_3_B	Cytochrome c oxidase assembly factor 4 homolog, mitochondrial OS=Homo sapiens GN=COA4 PE=1 SV=2	COA4_HUMAN	10 133,3	0.999	2	3	6	0.000315	0.437	SGCAASHFAVQECMAQHQDWR	R	Q	0.507	1.85	0.223	2 476,0340
EC_212270_T33Vspike_3_B	Cytochrome c oxidase assembly factor 4 homolog, mitochondrial OS=Homo sapiens GN=COA4 PE=1 SV=2	COA4_HUMAN	10 133,3	0.999	2	3	6	0.000315	0.437	VKKDDEEEDPLDQLISR	R	S	0.997	3.46	0.323	2 029,0088
EC_212270_T33Vspike_4_A	Cytochrome c oxidase assembly factor 4 homolog, mitochondrial OS=Homo sapiens GN=COA4 PE=1 SV=2	COA4_HUMAN	10 133,3	1	2	3	4	0.000161	0.437	SGCAASHFAVQECMAQHQDWR	R	Q	0.983	3.26	0.514	2 476,0340
EC_212270_T33Vspike_4_A	Cytochrome c oxidase assembly factor 4 homolog, mitochondrial OS=Homo sapiens GN=COA4 PE=1 SV=2	COA4_HUMAN	10 133,3	1	2	3	4	0.000161	0.437	VKKDDEEEDPLDQLISR	R	S	0.997	3.85	0.356	2 029,0088
EC_212270_T33Vspike_4_B	Cytochrome c oxidase assembly factor 4 homolog, mitochondrial OS=Homo sapiens GN=COA4 PE=1 SV=2	COA4_HUMAN	10 133,3	1	2	2	3	0.000119	0.437	SGCAASHFAVQECMAQHQDWR	R	Q	0.961	2.74	0.45	2 476,0340
EC_212270_T33Vspike_4_B	Cytochrome c oxidase assembly factor 4 homolog, mitochondrial OS=Homo sapiens GN=COA4 PE=1 SV=2	COA4_HUMAN	10 133,3	1	2	2	3	0.000119	0.437	VKKDDEEEDPLDQLISR	R	S	0.997	3.7	0.34	2 029,0088
EC_212270_T33Vspike_5_A	Cytochrome c oxidase assembly factor 4 homolog, mitochondrial OS=Homo sapiens GN=COA4 PE=1 SV=2	COA4_HUMAN	10 133,3	1	2	2	4	0.000169	0.437	SGCAASHFAVQECMAQHQDWR	R	Q	0.997	3.39	0.428	2 476,0340
EC_212270_T33Vspike_5_A	Cytochrome c oxidase assembly factor 4 homolog, mitochondrial OS=Homo sapiens GN=COA4 PE=1 SV=2	COA4_HUMAN	10 133,3	1	2	2	4	0.000169	0.437	VKKDDEEEDPLDQLISR	R	S	0.997	3.52	0.288	2 029,0088
EC_212270_T33Vspike_7_A	Cytochrome c oxidase assembly factor 4 homolog, mitochondrial OS=Homo sapiens GN=COA4 PE=1 SV=2	COA4_HUMAN	10 133,3	0.999	2	3	3	0.000136	0.437	SGCAASHFAVQECMAQHQDWR	R	Q	0.905	2.38	0.385	2 476,0340
EC_212270_T33Vspike_7_A	Cytochrome c oxidase assembly factor 4 homolog, mitochondrial OS=Homo sapiens GN=COA4 PE=1 SV=2	COA4_HUMAN	10 133,3	0.999	2	3	3	0.000136	0.437	VKKDDEEEDPLDQLISR	R	S	0.988	3.38	0.27	2 029,0088
EC_212270_T33Vspike_8_A	Cytochrome c oxidase assembly factor 4 homolog, mitochondrial OS=Homo sapiens GN=COA4 PE=1 SV=2	COA4_HUMAN	10 133,3	1	2	2	3	0.000141	0.437	SGCAASHFAVQECMAQHQDWR	R	Q	0.97	3.1	0.363	2 476,0340
EC_212270_T33Vspike_8_A	Cytochrome c oxidase assembly factor 4 homolog, mitochondrial OS=Homo sapiens GN=COA4 PE=1 SV=2	COA4_HUMAN	10 133,3	1	2	2	3	0.000141	0.437	VKKDDEEEDPLDQLISR	R	S	0.997	3.7	0.428	2 029,0088
EC_212270_T33Vspike_9_A	Cytochrome c oxidase assembly factor 4 homolog, mitochondrial OS=Homo sapiens GN=COA4 PE=1 SV=2	COA4_HUMAN	10 133,3	1	2	2	3	0.000145	0.437	SGCAASHFAVQECMAQHQDWR	R	Q	0.939	2.22	0.433	2 476,0340
EC_212270_T33Vspike_9_A	Cytochrome c oxidase assembly factor 4 homolog, mitochondrial OS=Homo sapiens GN=COA4 PE=1 SV=2	COA4_HUMAN	10 133,3	1	2	2	3	0.000145	0.437	VKKDDEEEDPLDQLISR	R	S	0.997	3.54	0.268	2 029,0088
EC_212270_T33Vspike_10_A	Cytochrome c oxidase assembly factor 4 homolog, mitochondrial OS=Homo sapiens GN=COA4 PE=1 SV=2	COA4_HUMAN	10 133,3	1	2	2	3	0.000163	0.437	SGCAASHFAVQECMAQHQDWR	R	Q	0.997	2.87	0.432	2 476,0340
EC_212270_T33Vspike_10_A	Cytochrome c oxidase assembly factor 4 homolog, mitochondrial OS=Homo sapiens GN=COA4 PE=1 SV=2	COA4_HUMAN	10 133,3	1	2	2	3	0.000163	0.437	VKKDDEEEDPLDQLISR	R	S	0.997	4.28	0.378	2 029,0088
EC_212270_T33Vspike_5_A	Cofilin-1 OS=Bos taurus GN=CFL1 PE=2 SV=3	COF1_BOVIN,COF1_HUMAN	18 519,2	1	2	2	2	8.45e-05	0.151	LGGSAVISLEGKPL	K	-	0.991	3.13	0.297	1 340,7786
EC_212270_T33Vspike_5_A	Cofilin-1 OS=Bos taurus GN=CFL1 PE=2 SV=3	COF1_BOVIN,COF1_HUMAN	18 519,2	1	2	2	2	8.45e-05	0.151	YALYDATYETK	R	E	0.997	2.73	0.398	1 337,6260
EC_212270_T33Vspike_5_B	Cofilin-1 OS=Bos taurus GN=CFL1 PE=2 SV=3	COF1_BOVIN,COF1_HUMAN	18 519,2	1	2	2	2	0.000102	0.151	LGGSAVISLEGKPL	K	-	0.993	3.19	0.374	1 340,7786
EC_212270_T33Vspike_5_B	Cofilin-1 OS=Bos taurus GN=CFL1 PE=2 SV=3	COF1_BOVIN,COF1_HUMAN	18 519,2	1	2	2	2	0.000102	0.151	YALYDATYETK	R	E	0.997	2.98	0.398	1 337,6260
EC_212270_T33Vspike_2_A	Cofilin-1 OS=Bos taurus GN=CFL1 PE=2 SV=3	COF1_BOVIN,COF1_HUMAN,COF1_MOUSE,COF1_RAT	18 519,2	1	3	3	3	0.000125	0.265	LGGSAVISLEGKPL	K	-	0.997	4.19	0.466	1 340,7786
EC_212270_T33Vspike_2_A	Cofilin-1 OS=Bos taurus GN=CFL1 PE=2 SV=3	COF1_BOVIN,COF1_HUMAN,COF1_MOUSE,COF1_RAT	18 519,2	1	3	3	3	0.000125	0.265	LTGIKHELQANCYEEVKDR	K	C	0.967	2.73	0.351	2 303,1451
EC_212270_T33Vspike_2_A	Cofilin-1 OS=Bos taurus GN=CFL1 PE=2 SV=3	COF1_BOVIN,COF1_HUMAN,COF1_MOUSE,COF1_RAT	18 519,2	1	3	3	3	0.000125	0.265	MIYASSKDAIK	K	K	0.776	2.13	0.259	1 226,6450
EC_212270_T33Vspike_4_A	Cofilin-1 OS=Bos taurus GN=CFL1 PE=2 SV=3	COF1_BOVIN,COF1_HUMAN,COF1_MOUSE,COF1_RAT	18 519,2	1	2	2	2	8.05e-05	0.151	LGGSAVISLEGKPL	K	-	0.921	2.83	0.187	1 340,7786
EC_212270_T33Vspike_4_A	Cofilin-1 OS=Bos taurus GN=CFL1 PE=2 SV=3	COF1_BOVIN,COF1_HUMAN,COF1_MOUSE,COF1_RAT	18 519,2	1	2	2	2	8.05e-05	0.151	YALYDATYETK	R	E	0.997	2.85	0.384	1 337,6260
EC_212270_T33Vspike_4_B	Cofilin-1 OS=Bos taurus GN=CFL1 PE=2 SV=3	COF1_BOVIN,COF1_HUMAN,COF1_MOUSE,COF1_RAT	18 519,2	1	2	2	2	7.93e-05	0.151	LGGSAVISLEGKPL	K	-	0.997	4.07	0.45	1 340,7786
EC_212270_T33Vspike_4_B	Cofilin-1 OS=Bos taurus GN=CFL1 PE=2 SV=3	COF1_BOVIN,COF1_HUMAN,COF1_MOUSE,COF1_RAT	18 519,2	1	2	2	2	7.93e-05	0.151	YALYDATYETK	R	E	0.997	3.26	0.423	1 337,6260
EC_212270_T33Vspike_1_A	Cytochrome c oxidase subunit 5A, mitochondrial OS=Homo sapiens GN=COX5A PE=1 SV=2	COX5A_HUMAN	16 762,5	1	3	4	5	0.000215	0.273	GINTLVTYDMVPEPK	K	I	0.997	4.08	0.521	1 676,8566
EC_212270_T33Vspike_1_A	Cytochrome c oxidase subunit 5A, mitochondrial OS=Homo sapiens GN=COX5A PE=1 SV=2	COX5A_HUMAN	16 762,5	1	3	4	5	0.000215	0.273	LNDFASTVR	R	I	0.997	2.9	0.346	1 022,5265
EC_212270_T33Vspike_1_A	Cytochrome c oxidase subunit 5A, mitochondrial OS=Homo sapiens GN=COX5A PE=1 SV=2	COX5A_HUMAN	16 762,5	1	3	4	5	0.000215	0.273	WVTYFNKPDIDAWELRK	R	G	0.988	3.21	0.336	2 181,1129
EC_212270_T33Vspike_1_B	Cytochrome c oxidase subunit 5A, mitochondrial OS=Homo sapiens GN=COX5A PE=1 SV=2	COX5A_HUMAN	16 762,5	1	2	3	4	0.000182	0.16	GINTLVTYDMVPEPK	K	I	0.997	3.75	0.499	1 676,8566
EC_212270_T33Vspike_1_B	Cytochrome c oxidase subunit 5A, mitochondrial OS=Homo sapiens GN=COX5A PE=1 SV=2	COX5A_HUMAN	16 762,5	1	2	3	4	0.000182	0.16	LNDFASTVR	R	I	0.979	2.75	0.331	1 022,5265
EC_212270_T33Vspike_2_A	Cytochrome c oxidase subunit 5A, mitochondrial OS=Homo sapiens GN=COX5A PE=1 SV=2	COX5A_HUMAN,COX5A_HYLSY,COX5A_NOMGA,COX5A_PANPA,COX5A_PANTR,COX5A_PONPY	16 762,5	1	2	2	2	8.35e-05	0.16	GINTLVTYDMVPEPK	K	I	0.997	3.9	0.492	1 676,8566
EC_212270_T33Vspike_2_A	Cytochrome c oxidase subunit 5A, mitochondrial OS=Homo sapiens GN=COX5A PE=1 SV=2	COX5A_HUMAN,COX5A_HYLSY,COX5A_NOMGA,COX5A_PANPA,COX5A_PANTR,COX5A_PONPY	16 762,5	1	2	2	2	8.35e-05	0.16	LNDFASTVR	R	I	0.997	3.05	0.313	1 022,5265
EC_212270_T33Vspike_2_B	Cytochrome c oxidase subunit 5A, mitochondrial OS=Homo sapiens GN=COX5A PE=1 SV=2	COX5A_HUMAN,COX5A_HYLSY,COX5A_NOMGA,COX5A_PANPA,COX5A_PANTR,COX5A_PONPY	16 762,5	1	2	2	2	8.71e-05	0.16	GINTLVTYDMVPEPK	K	I	0.997	3.63	0.494	1 676,8566
EC_212270_T33Vspike_2_B	Cytochrome c oxidase subunit 5A, mitochondrial OS=Homo sapiens GN=COX5A PE=1 SV=2	COX5A_HUMAN,COX5A_HYLSY,COX5A_NOMGA,COX5A_PANPA,COX5A_PANTR,COX5A_PONPY	16 762,5	1	2	2	2	8.71e-05	0.16	LNDFASTVR	R	I	0.987	2.71	0.405	1 022,5265
EC_212270_T33Vspike_3_A	Cytochrome c oxidase subunit 5A, mitochondrial OS=Homo sapiens GN=COX5A PE=1 SV=2	COX5A_HUMAN,COX5A_HYLSY,COX5A_NOMGA,COX5A_PANPA,COX5A_PANTR,COX5A_PONPY	16 762,5	1	5	6	9	0.000452	0.347	GINTLVTYDMVPEPK	K	I	0.997	4.18	0.565	1 676,8566
EC_212270_T33Vspike_3_A	Cytochrome c oxidase subunit 5A, mitochondrial OS=Homo sapiens GN=COX5A PE=1 SV=2	COX5A_HUMAN,COX5A_HYLSY,COX5A_NOMGA,COX5A_PANPA,COX5A_PANTR,COX5A_PONPY	16 762,5	1	5	6	9	0.000452	0.347	GINTLVTYDMVPEPKIIDAALRACR	K	R	0.331	2.22	0.193	2 759,4586
EC_212270_T33Vspike_3_A	Cytochrome c oxidase subunit 5A, mitochondrial OS=Homo sapiens GN=COX5A PE=1 SV=2	COX5A_HUMAN,COX5A_HYLSY,COX5A_NOMGA,COX5A_PANPA,COX5A_PANTR,COX5A_PONPY	16 762,5	1	5	6	9	0.000452	0.347	LNDFASTVR	R	I	0.358	1.91	0.176	1 022,5265
EC_212270_T33Vspike_3_A	Cytochrome c oxidase subunit 5A, mitochondrial OS=Homo sapiens GN=COX5A PE=1 SV=2	COX5A_HUMAN,COX5A_HYLSY,COX5A_NOMGA,COX5A_PANPA,COX5A_PANTR,COX5A_PONPY	16 762,5	1	5	6	9	0.000452	0.347	RLNDFASTVR	R	I	0.653	2.64	0.161	1 178,6276
EC_212270_T33Vspike_3_A	Cytochrome c oxidase subunit 5A, mitochondrial OS=Homo sapiens GN=COX5A PE=1 SV=2	COX5A_HUMAN,COX5A_HYLSY,COX5A_NOMGA,COX5A_PANPA,COX5A_PANTR,COX5A_PONPY	16 762,5	1	5	6	9	0.000452	0.347	WVTYFNKPDIDAWELRK	R	G	0.873	2.29	0.26	2 181,1129
EC_212270_T33Vspike_3_B	Cytochrome c oxidase subunit 5A, mitochondrial OS=Homo sapiens GN=COX5A PE=1 SV=2	COX5A_HUMAN,COX5A_HYLSY,COX5A_NOMGA,COX5A_PANPA,COX5A_PANTR,COX5A_PONPY	16 762,5	1	4	5	6	0.000315	0.28	GINTLVTYDMVPEPK	K	I	0.997	4.08	0.542	1 676,8566
EC_212270_T33Vspike_3_B	Cytochrome c oxidase subunit 5A, mitochondrial OS=Homo sapiens GN=COX5A PE=1 SV=2	COX5A_HUMAN,COX5A_HYLSY,COX5A_NOMGA,COX5A_PANPA,COX5A_PANTR,COX5A_PONPY	16 762,5	1	4	5	6	0.000315	0.28	LNDFASTVR	R	I	0.783	2.2	0.146	1 022,5265
EC_212270_T33Vspike_3_B	Cytochrome c oxidase subunit 5A, mitochondrial OS=Homo sapiens GN=COX5A PE=1 SV=2	COX5A_HUMAN,COX5A_HYLSY,COX5A_NOMGA,COX5A_PANPA,COX5A_PANTR,COX5A_PONPY	16 762,5	1	4	5	6	0.000315	0.28	RLNDFASTVR	R	I	0.796	2.36	0.202	1 178,6276
EC_212270_T33Vspike_3_B	Cytochrome c oxidase subunit 5A, mitochondrial OS=Homo sapiens GN=COX5A PE=1 SV=2	COX5A_HUMAN,COX5A_HYLSY,COX5A_NOMGA,COX5A_PANPA,COX5A_PANTR,COX5A_PONPY	16 762,5	1	4	5	6	0.000315	0.28	WVTYFNKPDIDAWELRK	R	G	0.997	3.71	0.433	2 181,1129
EC_212270_T33Vspike_4_A	Cytochrome c oxidase subunit 5A, mitochondrial OS=Homo sapiens GN=COX5A PE=1 SV=2	COX5A_HUMAN,COX5A_HYLSY,COX5A_NOMGA,COX5A_PANPA,COX5A_PANTR,COX5A_PONPY	16 762,5	0.998	2	2	2	8.05e-05	0.16	GINTLVTYDMVPEPK	K	I	0.955	2.67	0.398	1 676,8566
EC_212270_T33Vspike_4_A	Cytochrome c oxidase subunit 5A, mitochondrial OS=Homo sapiens GN=COX5A PE=1 SV=2	COX5A_HUMAN,COX5A_HYLSY,COX5A_NOMGA,COX5A_PANPA,COX5A_PANTR,COX5A_PONPY	16 762,5	0.998	2	2	2	8.05e-05	0.16	LNDFASTVR	R	I	0.96	2.57	0.24	1 022,5265
EC_212270_T33Vspike_4_B	Cytochrome c oxidase subunit 5A, mitochondrial OS=Homo sapiens GN=COX5A PE=1 SV=2	COX5A_HUMAN,COX5A_HYLSY,COX5A_NOMGA,COX5A_PANPA,COX5A_PANTR,COX5A_PONPY	16 762,5	1	3	3	4	0.000159	0.273	GINTLVTYDMVPEPK	K	I	0.997	4.09	0.467	1 676,8566
EC_212270_T33Vspike_4_B	Cytochrome c oxidase subunit 5A, mitochondrial OS=Homo sapiens GN=COX5A PE=1 SV=2	COX5A_HUMAN,COX5A_HYLSY,COX5A_NOMGA,COX5A_PANPA,COX5A_PANTR,COX5A_PONPY	16 762,5	1	3	3	4	0.000159	0.273	LNDFASTVR	R	I	0.975	3	0.289	1 022,5265
EC_212270_T33Vspike_4_B	Cytochrome c oxidase subunit 5A, mitochondrial OS=Homo sapiens GN=COX5A PE=1 SV=2	COX5A_HUMAN,COX5A_HYLSY,COX5A_NOMGA,COX5A_PANPA,COX5A_PANTR,COX5A_PONPY	16 762,5	1	3	3	4	0.000159	0.273	WVTYFNKPDIDAWELRK	R	G	0.996	3.42	0.352	2 181,1129
EC_212270_T33Vspike_5_B	Cytochrome c oxidase subunit 5A, mitochondrial OS=Homo sapiens GN=COX5A PE=1 SV=2	COX5A_HUMAN,COX5A_HYLSY,COX5A_NOMGA,COX5A_PANPA,COX5A_PANTR,COX5A_PONPY	16 762,5	0.996	2	2	2	0.000102	0.16	GINTLVTYDMVPEPK	K	I	0.893	2.18	0.29	1 676,8566
EC_212270_T33Vspike_5_B	Cytochrome c oxidase subunit 5A, mitochondrial OS=Homo sapiens GN=COX5A PE=1 SV=2	COX5A_HUMAN,COX5A_HYLSY,COX5A_NOMGA,COX5A_PANPA,COX5A_PANTR,COX5A_PONPY	16 762,5	0.996	2	2	2	0.000102	0.16	LNDFASTVR	R	I	0.964	2.85	0.342	1 022,5265
EC_212270_T33Vspike_6_A	Cytochrome c oxidase subunit 5A, mitochondrial OS=Homo sapiens GN=COX5A PE=1 SV=2	COX5A_HUMAN,COX5A_HYLSY,COX5A_NOMGA,COX5A_PANPA,COX5A_PANTR,COX5A_PONPY	16 762,5	0.994	2	2	2	0.000111	0.16	GINTLVTYDMVPEPK	K	I	0.9	2.34	0.422	1 676,8566
EC_212270_T33Vspike_6_A	Cytochrome c oxidase subunit 5A, mitochondrial OS=Homo sapiens GN=COX5A PE=1 SV=2	COX5A_HUMAN,COX5A_HYLSY,COX5A_NOMGA,COX5A_PANPA,COX5A_PANTR,COX5A_PONPY	16 762,5	0.994	2	2	2	0.000111	0.16	LNDFASTVR	R	I	0.911	2.4	0.421	1 022,5265
EC_212270_T33Vspike_7_B	Cytochrome c oxidase subunit 5A, mitochondrial OS=Homo sapiens GN=COX5A PE=1 SV=2	COX5A_HUMAN,COX5A_HYLSY,COX5A_NOMGA,COX5A_PANPA,COX5A_PANTR,COX5A_PONPY	16 762,5	0.988	2	2	2	9.09e-05	0.16	GINTLVTYDMVPEPK	K	I	0.777	2	0.265	1 676,8566
EC_212270_T33Vspike_7_B	Cytochrome c oxidase subunit 5A, mitochondrial OS=Homo sapiens GN=COX5A PE=1 SV=2	COX5A_HUMAN,COX5A_HYLSY,COX5A_NOMGA,COX5A_PANPA,COX5A_PANTR,COX5A_PONPY	16 762,5	0.988	2	2	2	9.09e-05	0.16	LNDFASTVR	R	I	0.947	2.72	0.257	1 022,5265
EC_212270_T33Vspike_8_A	Cytochrome c oxidase subunit 5A, mitochondrial OS=Homo sapiens GN=COX5A PE=1 SV=2	COX5A_HUMAN,COX5A_HYLSY,COX5A_NOMGA,COX5A_PANPA,COX5A_PANTR,COX5A_PONPY	16 762,5	1	3	3	3	0.000141	0.273	GINTLVTYDMVPEPK	K	I	0.997	3.14	0.41	1 676,8566
EC_212270_T33Vspike_8_A	Cytochrome c oxidase subunit 5A, mitochondrial OS=Homo sapiens GN=COX5A PE=1 SV=2	COX5A_HUMAN,COX5A_HYLSY,COX5A_NOMGA,COX5A_PANPA,COX5A_PANTR,COX5A_PONPY	16 762,5	1	3	3	3	0.000141	0.273	LNDFASTVR	R	I	0.862	2.46	0.272	1 022,5265
EC_212270_T33Vspike_8_A	Cytochrome c oxidase subunit 5A, mitochondrial OS=Homo sapiens GN=COX5A PE=1 SV=2	COX5A_HUMAN,COX5A_HYLSY,COX5A_NOMGA,COX5A_PANPA,COX5A_PANTR,COX5A_PONPY	16 762,5	1	3	3	3	0.000141	0.273	WVTYFNKPDIDAWELRK	R	G	0.954	2.85	0.271	2 181,1129
EC_212270_T33Vspike_8_B	Cytochrome c oxidase subunit 5A, mitochondrial OS=Homo sapiens GN=COX5A PE=1 SV=2	COX5A_HUMAN,COX5A_HYLSY,COX5A_NOMGA,COX5A_PANPA,COX5A_PANTR,COX5A_PONPY	16 762,5	1	3	3	3	0.000144	0.273	GINTLVTYDMVPEPK	K	I	0.997	3.3	0.459	1 676,8566
EC_212270_T33Vspike_8_B	Cytochrome c oxidase subunit 5A, mitochondrial OS=Homo sapiens GN=COX5A PE=1 SV=2	COX5A_HUMAN,COX5A_HYLSY,COX5A_NOMGA,COX5A_PANPA,COX5A_PANTR,COX5A_PONPY	16 762,5	1	3	3	3	0.000144	0.273	LNDFASTVR	R	I	0.953	2.46	0.29	1 022,5265
EC_212270_T33Vspike_8_B	Cytochrome c oxidase subunit 5A, mitochondrial OS=Homo sapiens GN=COX5A PE=1 SV=2	COX5A_HUMAN,COX5A_HYLSY,COX5A_NOMGA,COX5A_PANPA,COX5A_PANTR,COX5A_PONPY	16 762,5	1	3	3	3	0.000144	0.273	WVTYFNKPDIDAWELRK	R	G	0.895	2.48	0.303	2 181,1129
EC_212270_T33Vspike_9_A	Cytochrome c oxidase subunit 5A, mitochondrial OS=Homo sapiens GN=COX5A PE=1 SV=2	COX5A_HUMAN,COX5A_HYLSY,COX5A_NOMGA,COX5A_PANPA,COX5A_PANTR,COX5A_PONPY	16 762,5	1	2	3	4	0.000194	0.16	GINTLVTYDMVPEPK	K	I	0.997	3.46	0.562	1 676,8566
EC_212270_T33Vspike_9_A	Cytochrome c oxidase subunit 5A, mitochondrial OS=Homo sapiens GN=COX5A PE=1 SV=2	COX5A_HUMAN,COX5A_HYLSY,COX5A_NOMGA,COX5A_PANPA,COX5A_PANTR,COX5A_PONPY	16 762,5	1	2	3	4	0.000194	0.16	LNDFASTVR	R	I	0.996	2.96	0.296	1 022,5265
EC_212270_T33Vspike_9_B	Cytochrome c oxidase subunit 5A, mitochondrial OS=Homo sapiens GN=COX5A PE=1 SV=2	COX5A_HUMAN,COX5A_HYLSY,COX5A_NOMGA,COX5A_PANPA,COX5A_PANTR,COX5A_PONPY	16 762,5	1	2	2	2	0.000103	0.16	GINTLVTYDMVPEPK	K	I	0.997	3.02	0.441	1 676,8566
EC_212270_T33Vspike_9_B	Cytochrome c oxidase subunit 5A, mitochondrial OS=Homo sapiens GN=COX5A PE=1 SV=2	COX5A_HUMAN,COX5A_HYLSY,COX5A_NOMGA,COX5A_PANPA,COX5A_PANTR,COX5A_PONPY	16 762,5	1	2	2	2	0.000103	0.16	LNDFASTVR	R	I	0.929	2.49	0.309	1 022,5265
EC_212270_T33Vspike_10_A	Cytochrome c oxidase subunit 5A, mitochondrial OS=Homo sapiens GN=COX5A PE=1 SV=2	COX5A_HUMAN,COX5A_HYLSY,COX5A_NOMGA,COX5A_PANPA,COX5A_PANTR,COX5A_PONPY	16 762,5	0.992	2	2	3	0.000163	0.16	GINTLVTYDMVPEPK	K	I	0.923	2.53	0.323	1 676,8566
EC_212270_T33Vspike_10_A	Cytochrome c oxidase subunit 5A, mitochondrial OS=Homo sapiens GN=COX5A PE=1 SV=2	COX5A_HUMAN,COX5A_HYLSY,COX5A_NOMGA,COX5A_PANPA,COX5A_PANTR,COX5A_PONPY	16 762,5	0.992	2	2	3	0.000163	0.16	LNDFASTVR	R	I	0.895	2.61	0.0818	1 022,5265
EC_212270_T33Vspike_1_A	Cytochrome c oxidase subunit 5B, mitochondrial OS=Homo sapiens GN=COX5B PE=1 SV=2	COX5B_HUMAN,COX5B_PONAB	13 695,7	1	2	3	3	0.000129	0.287	IVGCICEEDNTSVVWFWLHKGEAQR	R	C	0.991	3.59	0.314	3 033,4348
EC_212270_T33Vspike_1_A	Cytochrome c oxidase subunit 5B, mitochondrial OS=Homo sapiens GN=COX5B PE=1 SV=2	COX5B_HUMAN,COX5B_PONAB	13 695,7	1	2	3	3	0.000129	0.287	KGLDPYNVLAPK	K	G	0.948	2.73	0.198	1 314,7418
EC_212270_T33Vspike_3_A	Cytochrome c oxidase subunit 5B, mitochondrial OS=Homo sapiens GN=COX5B PE=1 SV=2	COX5B_HUMAN,COX5B_PONAB	13 695,7	1	2	2	4	0.000201	0.287	IVGCICEEDNTSVVWFWLHKGEAQR	R	C	0.997	3.41	0.404	3 033,4348
EC_212270_T33Vspike_3_A	Cytochrome c oxidase subunit 5B, mitochondrial OS=Homo sapiens GN=COX5B PE=1 SV=2	COX5B_HUMAN,COX5B_PONAB	13 695,7	1	2	2	4	0.000201	0.287	KGLDPYNVLAPK	K	G	0.926	2.61	0.201	1 314,7418
EC_212270_T33Vspike_4_B	Cytochrome c oxidase subunit 5B, mitochondrial OS=Homo sapiens GN=COX5B PE=1 SV=2	COX5B_HUMAN,COX5B_PONAB	13 695,7	1	2	2	3	0.000119	0.287	IVGCICEEDNTSVVWFWLHKGEAQR	R	C	0.997	4.63	0.464	3 033,4348
EC_212270_T33Vspike_4_B	Cytochrome c oxidase subunit 5B, mitochondrial OS=Homo sapiens GN=COX5B PE=1 SV=2	COX5B_HUMAN,COX5B_PONAB	13 695,7	1	2	2	3	0.000119	0.287	KGLDPYNVLAPK	K	G	0.926	2.75	0.21	1 314,7418
EC_212270_T33Vspike_6_A	Cytochrome c oxidase subunit 5B, mitochondrial OS=Homo sapiens GN=COX5B PE=1 SV=2	COX5B_HUMAN,COX5B_PONAB	13 633,6	1	2	2	2	0.000111	0.287	IVGCICEEDNTSVVWFWLHKGEAQR	R	C	0.963	3.09	0.222	3 033,4348
EC_212270_T33Vspike_6_A	Cytochrome c oxidase subunit 5B, mitochondrial OS=Homo sapiens GN=COX5B PE=1 SV=2	COX5B_HUMAN,COX5B_PONAB	13 633,6	1	2	2	2	0.000111	0.287	KGLDPYNVLAPK	K	G	0.997	3.28	0.305	1 314,7418
EC_212270_T33Vspike_12_A	Cytochrome c oxidase subunit 5B, mitochondrial OS=Pongo abelii GN=COX5B PE=2 SV=1	COX5B_PONAB	13 633,6	0.999	3	3	4	0.0002	0.411	IVGCICEEDNTSVVWFWLHKGEAQR	R	C	0.997	3.43	0.214	3 033,4348
EC_212270_T33Vspike_12_A	Cytochrome c oxidase subunit 5B, mitochondrial OS=Pongo abelii GN=COX5B PE=2 SV=1	COX5B_PONAB	13 633,6	0.999	3	3	4	0.0002	0.411	KGLDPYNVLAPK	K	G	0.408	2.53	0.252	1 314,7418
EC_212270_T33Vspike_12_A	Cytochrome c oxidase subunit 5B, mitochondrial OS=Pongo abelii GN=COX5B PE=2 SV=1	COX5B_PONAB	13 633,6	0.999	3	3	4	0.0002	0.411	LLRGAGALAAQALRAR	R	G	0.288	0.768	-0.0955	1 607,9817
EC_212270_T33Vspike_1_A	Cytochrome c oxidase subunit 6B1 OS=Homo sapiens GN=COX6B1 PE=1 SV=2	CX6B1_HUMAN,CX6B1_PONAB	10 192,3	1	3	5	5	0.000215	0.581	GGDISVCEWYQR	K	V	0.986	2.62	0.446	1 469,6479
EC_212270_T33Vspike_1_A	Cytochrome c oxidase subunit 6B1 OS=Homo sapiens GN=COX6B1 PE=1 SV=2	CX6B1_HUMAN,CX6B1_PONAB	10 192,3	1	3	5	5	0.000215	0.581	NCWQNYLDFHR	R	C	0.997	3.37	0.464	1 552,6750
EC_212270_T33Vspike_1_A	Cytochrome c oxidase subunit 6B1 OS=Homo sapiens GN=COX6B1 PE=1 SV=2	CX6B1_HUMAN,CX6B1_PONAB	10 192,3	1	3	5	5	0.000215	0.581	VYQSLCPTSWVTDWDEQRAEGTFPGKI	R	-	0.883	2.9	0.246	3 170,4891
EC_212270_T33Vspike_1_B	Cytochrome c oxidase subunit 6B1 OS=Homo sapiens GN=COX6B1 PE=1 SV=2	CX6B1_HUMAN,CX6B1_PONAB	10 192,3	1	2	4	4	0.000182	0.267	GGDISVCEWYQR	K	V	0.997	2.96	0.387	1 469,6479
EC_212270_T33Vspike_1_B	Cytochrome c oxidase subunit 6B1 OS=Homo sapiens GN=COX6B1 PE=1 SV=2	CX6B1_HUMAN,CX6B1_PONAB	10 192,3	1	2	4	4	0.000182	0.267	NCWQNYLDFHR	R	C	0.997	3.17	0.358	1 552,6750
EC_212270_T33Vspike_2_A	Cytochrome c oxidase subunit 6B1 OS=Homo sapiens GN=COX6B1 PE=1 SV=2	CX6B1_HUMAN,CX6B1_PONAB	10 192,3	1	2	3	3	0.000125	0.267	GGDISVCEWYQR	K	V	0.997	3	0.576	1 469,6479
EC_212270_T33Vspike_2_A	Cytochrome c oxidase subunit 6B1 OS=Homo sapiens GN=COX6B1 PE=1 SV=2	CX6B1_HUMAN,CX6B1_PONAB	10 192,3	1	2	3	3	0.000125	0.267	NCWQNYLDFHR	R	C	0.996	3.03	0.34	1 552,6750
EC_212270_T33Vspike_2_B	Cytochrome c oxidase subunit 6B1 OS=Homo sapiens GN=COX6B1 PE=1 SV=2	CX6B1_HUMAN,CX6B1_PONAB	10 192,3	1	2	3	3	0.000131	0.267	GGDISVCEWYQR	K	V	0.997	3.39	0.588	1 469,6479
EC_212270_T33Vspike_2_B	Cytochrome c oxidase subunit 6B1 OS=Homo sapiens GN=COX6B1 PE=1 SV=2	CX6B1_HUMAN,CX6B1_PONAB	10 192,3	1	2	3	3	0.000131	0.267	NCWQNYLDFHR	R	C	0.997	3.88	0.491	1 552,6750
EC_212270_T33Vspike_3_A	Cytochrome c oxidase subunit 6B1 OS=Homo sapiens GN=COX6B1 PE=1 SV=2	CX6B1_HUMAN,CX6B1_PONAB	10 192,3	1	3	5	8	0.000402	0.581	GGDISVCEWYQR	K	V	0.997	3.22	0.579	1 469,6479
EC_212270_T33Vspike_3_A	Cytochrome c oxidase subunit 6B1 OS=Homo sapiens GN=COX6B1 PE=1 SV=2	CX6B1_HUMAN,CX6B1_PONAB	10 192,3	1	3	5	8	0.000402	0.581	NCWQNYLDFHR	R	C	0.992	3.19	0.237	1 552,6750
EC_212270_T33Vspike_3_A	Cytochrome c oxidase subunit 6B1 OS=Homo sapiens GN=COX6B1 PE=1 SV=2	CX6B1_HUMAN,CX6B1_PONAB	10 192,3	1	3	5	8	0.000402	0.581	VYQSLCPTSWVTDWDEQRAEGTFPGKI	R	-	0.712	2.2	0.251	3 113,4676
EC_212270_T33Vspike_3_B	Cytochrome c oxidase subunit 6B1 OS=Homo sapiens GN=COX6B1 PE=1 SV=2	CX6B1_HUMAN,CX6B1_PONAB	10 192,3	1	3	3	4	0.00021	0.581	GGDISVCEWYQR	K	V	0.997	3.43	0.591	1 469,6479
EC_212270_T33Vspike_3_B	Cytochrome c oxidase subunit 6B1 OS=Homo sapiens GN=COX6B1 PE=1 SV=2	CX6B1_HUMAN,CX6B1_PONAB	10 192,3	1	3	3	4	0.00021	0.581	NCWQNYLDFHR	R	C	0.997	3.32	0.456	1 552,6750
EC_212270_T33Vspike_3_B	Cytochrome c oxidase subunit 6B1 OS=Homo sapiens GN=COX6B1 PE=1 SV=2	CX6B1_HUMAN,CX6B1_PONAB	10 192,3	1	3	3	4	0.00021	0.581	VYQSLCPTSWVTDWDEQRAEGTFPGKI	R	-	0.177	1.74	0.0373	3 113,4676
EC_212270_T33Vspike_4_A	Cytochrome c oxidase subunit 6B1 OS=Homo sapiens GN=COX6B1 PE=1 SV=2	CX6B1_HUMAN,CX6B1_PONAB	10 192,3	1	3	4	5	0.000201	0.326	AMTAKGGDISVCEWYQR	K	V	0.997	3.66	0.469	1 971,9053
EC_212270_T33Vspike_4_A	Cytochrome c oxidase subunit 6B1 OS=Homo sapiens GN=COX6B1 PE=1 SV=2	CX6B1_HUMAN,CX6B1_PONAB	10 192,3	1	3	4	5	0.000201	0.326	GGDISVCEWYQR	K	V	0.997	3.56	0.503	1 469,6479
EC_212270_T33Vspike_4_A	Cytochrome c oxidase subunit 6B1 OS=Homo sapiens GN=COX6B1 PE=1 SV=2	CX6B1_HUMAN,CX6B1_PONAB	10 192,3	1	3	4	5	0.000201	0.326	NCWQNYLDFHR	R	C	0.997	3.3	0.318	1 552,6750
EC_212270_T33Vspike_4_B	Cytochrome c oxidase subunit 6B1 OS=Homo sapiens GN=COX6B1 PE=1 SV=2	CX6B1_HUMAN,CX6B1_PONAB	10 192,3	1	3	4	6	0.000238	0.326	AMTAKGGDISVCEWYQR	K	V	0.997	3.17	0.388	1 971,9053
EC_212270_T33Vspike_4_B	Cytochrome c oxidase subunit 6B1 OS=Homo sapiens GN=COX6B1 PE=1 SV=2	CX6B1_HUMAN,CX6B1_PONAB	10 192,3	1	3	4	6	0.000238	0.326	GGDISVCEWYQR	K	V	0.997	3.06	0.527	1 469,6479
EC_212270_T33Vspike_4_B	Cytochrome c oxidase subunit 6B1 OS=Homo sapiens GN=COX6B1 PE=1 SV=2	CX6B1_HUMAN,CX6B1_PONAB	10 192,3	1	3	4	6	0.000238	0.326	NCWQNYLDFHR	R	C	0.997	3.3	0.352	1 552,6750
EC_212270_T33Vspike_5_A	Cytochrome c oxidase subunit 6B1 OS=Homo sapiens GN=COX6B1 PE=1 SV=2	CX6B1_HUMAN,CX6B1_PONAB	10 192,3	1	2	3	4	0.000169	0.267	GGDISVCEWYQR	K	V	0.986	2.62	0.471	1 469,6479
EC_212270_T33Vspike_5_A	Cytochrome c oxidase subunit 6B1 OS=Homo sapiens GN=COX6B1 PE=1 SV=2	CX6B1_HUMAN,CX6B1_PONAB	10 192,3	1	2	3	4	0.000169	0.267	NCWQNYLDFHR	R	C	0.997	3.39	0.456	1 552,6750
EC_212270_T33Vspike_5_B	Cytochrome c oxidase subunit 6B1 OS=Homo sapiens GN=COX6B1 PE=1 SV=2	CX6B1_HUMAN,CX6B1_PONAB	10 192,3	1	3	3	4	0.000204	0.326	AMTAKGGDISVCEWYQR	K	V	0.953	2.77	0.287	1 971,9053
EC_212270_T33Vspike_5_B	Cytochrome c oxidase subunit 6B1 OS=Homo sapiens GN=COX6B1 PE=1 SV=2	CX6B1_HUMAN,CX6B1_PONAB	10 192,3	1	3	3	4	0.000204	0.326	GGDISVCEWYQR	K	V	0.997	3.17	0.495	1 469,6479
EC_212270_T33Vspike_5_B	Cytochrome c oxidase subunit 6B1 OS=Homo sapiens GN=COX6B1 PE=1 SV=2	CX6B1_HUMAN,CX6B1_PONAB	10 192,3	1	3	3	4	0.000204	0.326	NCWQNYLDFHR	R	C	0.987	3.09	0.532	1 552,6750
EC_212270_T33Vspike_6_A	Cytochrome c oxidase subunit 6B1 OS=Homo sapiens GN=COX6B1 PE=1 SV=2	CX6B1_HUMAN,CX6B1_PONAB	10 192,3	1	3	4	4	0.000221	0.581	GGDISVCEWYQR	K	V	0.997	3.28	0.53	1 469,6479
EC_212270_T33Vspike_6_A	Cytochrome c oxidase subunit 6B1 OS=Homo sapiens GN=COX6B1 PE=1 SV=2	CX6B1_HUMAN,CX6B1_PONAB	10 192,3	1	3	4	4	0.000221	0.581	NCWQNYLDFHR	R	C	0.924	2.32	0.317	1 552,6750
EC_212270_T33Vspike_6_A	Cytochrome c oxidase subunit 6B1 OS=Homo sapiens GN=COX6B1 PE=1 SV=2	CX6B1_HUMAN,CX6B1_PONAB	10 192,3	1	3	4	4	0.000221	0.581	VYQSLCPTSWVTDWDEQRAEGTFPGKI	R	-	0.895	2.65	0.284	3 170,4891
EC_212270_T33Vspike_6_B	Cytochrome c oxidase subunit 6B1 OS=Homo sapiens GN=COX6B1 PE=1 SV=2	CX6B1_HUMAN,CX6B1_PONAB	10 192,3	1	2	2	4	0.00024	0.267	GGDISVCEWYQR	K	V	0.997	2.94	0.62	1 469,6479
EC_212270_T33Vspike_6_B	Cytochrome c oxidase subunit 6B1 OS=Homo sapiens GN=COX6B1 PE=1 SV=2	CX6B1_HUMAN,CX6B1_PONAB	10 192,3	1	2	2	4	0.00024	0.267	NCWQNYLDFHR	R	C	0.997	2.74	0.447	1 552,6750
EC_212270_T33Vspike_7_A	Cytochrome c oxidase subunit 6B1 OS=Homo sapiens GN=COX6B1 PE=1 SV=2	CX6B1_HUMAN,CX6B1_PONAB	10 192,3	1	3	4	5	0.000226	0.326	AMTAKGGDISVCEWYQR	K	V	0.997	3.63	0.461	1 971,9053
EC_212270_T33Vspike_7_A	Cytochrome c oxidase subunit 6B1 OS=Homo sapiens GN=COX6B1 PE=1 SV=2	CX6B1_HUMAN,CX6B1_PONAB	10 192,3	1	3	4	5	0.000226	0.326	GGDISVCEWYQR	K	V	0.996	2.93	0.615	1 469,6479
EC_212270_T33Vspike_7_A	Cytochrome c oxidase subunit 6B1 OS=Homo sapiens GN=COX6B1 PE=1 SV=2	CX6B1_HUMAN,CX6B1_PONAB	10 192,3	1	3	4	5	0.000226	0.326	NCWQNYLDFHR	R	C	0.997	3.49	0.381	1 552,6750
EC_212270_T33Vspike_7_B	Cytochrome c oxidase subunit 6B1 OS=Homo sapiens GN=COX6B1 PE=1 SV=2	CX6B1_HUMAN,CX6B1_PONAB	10 192,3	1	3	4	4	0.000182	0.326	AMTAKGGDISVCEWYQR	K	V	0.92	2.55	0.21	1 971,9053
EC_212270_T33Vspike_7_B	Cytochrome c oxidase subunit 6B1 OS=Homo sapiens GN=COX6B1 PE=1 SV=2	CX6B1_HUMAN,CX6B1_PONAB	10 192,3	1	3	4	4	0.000182	0.326	GGDISVCEWYQR	K	V	0.997	3.16	0.399	1 469,6479
EC_212270_T33Vspike_7_B	Cytochrome c oxidase subunit 6B1 OS=Homo sapiens GN=COX6B1 PE=1 SV=2	CX6B1_HUMAN,CX6B1_PONAB	10 192,3	1	3	4	4	0.000182	0.326	NCWQNYLDFHR	R	C	0.917	2.27	0.306	1 552,6750
EC_212270_T33Vspike_8_A	Cytochrome c oxidase subunit 6B1 OS=Homo sapiens GN=COX6B1 PE=1 SV=2	CX6B1_HUMAN,CX6B1_PONAB	10 192,3	0.999	2	3	4	0.000188	0.267	GGDISVCEWYQR	K	V	0.959	2.75	0.437	1 469,6479
EC_212270_T33Vspike_8_A	Cytochrome c oxidase subunit 6B1 OS=Homo sapiens GN=COX6B1 PE=1 SV=2	CX6B1_HUMAN,CX6B1_PONAB	10 192,3	0.999	2	3	4	0.000188	0.267	NCWQNYLDFHR	R	C	0.955	2.01	0.398	1 552,6750
EC_212270_T33Vspike_8_B	Cytochrome c oxidase subunit 6B1 OS=Homo sapiens GN=COX6B1 PE=1 SV=2	CX6B1_HUMAN,CX6B1_PONAB	10 192,3	1	3	4	4	0.000192	0.326	AMTAKGGDISVCEWYQR	K	V	0.951	2.7	0.24	1 971,9053
EC_212270_T33Vspike_8_B	Cytochrome c oxidase subunit 6B1 OS=Homo sapiens GN=COX6B1 PE=1 SV=2	CX6B1_HUMAN,CX6B1_PONAB	10 192,3	1	3	4	4	0.000192	0.326	GGDISVCEWYQR	K	V	0.997	2.97	0.56	1 469,6479
EC_212270_T33Vspike_8_B	Cytochrome c oxidase subunit 6B1 OS=Homo sapiens GN=COX6B1 PE=1 SV=2	CX6B1_HUMAN,CX6B1_PONAB	10 192,3	1	3	4	4	0.000192	0.326	NCWQNYLDFHR	R	C	0.997	3.12	0.428	1 552,6750
EC_212270_T33Vspike_9_A	Cytochrome c oxidase subunit 6B1 OS=Homo sapiens GN=COX6B1 PE=1 SV=2	CX6B1_HUMAN,CX6B1_PONAB	10 192,3	1	3	5	5	0.000242	0.326	AMTAKGGDISVCEWYQR	K	V	0.997	2.95	0.414	1 971,9053
EC_212270_T33Vspike_9_A	Cytochrome c oxidase subunit 6B1 OS=Homo sapiens GN=COX6B1 PE=1 SV=2	CX6B1_HUMAN,CX6B1_PONAB	10 192,3	1	3	5	5	0.000242	0.326	GGDISVCEWYQR	K	V	0.997	3.1	0.555	1 469,6479
EC_212270_T33Vspike_9_A	Cytochrome c oxidase subunit 6B1 OS=Homo sapiens GN=COX6B1 PE=1 SV=2	CX6B1_HUMAN,CX6B1_PONAB	10 192,3	1	3	5	5	0.000242	0.326	NCWQNYLDFHR	R	C	0.997	2.76	0.406	1 552,6750
EC_212270_T33Vspike_9_B	Cytochrome c oxidase subunit 6B1 OS=Homo sapiens GN=COX6B1 PE=1 SV=2	CX6B1_HUMAN,CX6B1_PONAB	10 192,3	1	2	3	4	0.000206	0.267	GGDISVCEWYQR	K	V	0.997	3.2	0.559	1 469,6479
EC_212270_T33Vspike_9_B	Cytochrome c oxidase subunit 6B1 OS=Homo sapiens GN=COX6B1 PE=1 SV=2	CX6B1_HUMAN,CX6B1_PONAB	10 192,3	1	2	3	4	0.000206	0.267	NCWQNYLDFHR	R	C	0.985	2.73	0.311	1 552,6750
EC_212270_T33Vspike_10_A	Cytochrome c oxidase subunit 6B1 OS=Homo sapiens GN=COX6B1 PE=1 SV=2	CX6B1_HUMAN,CX6B1_PONAB	10 192,3	1	2	2	3	0.000163	0.267	GGDISVCEWYQR	K	V	0.997	3.23	0.576	1 469,6479
EC_212270_T33Vspike_10_A	Cytochrome c oxidase subunit 6B1 OS=Homo sapiens GN=COX6B1 PE=1 SV=2	CX6B1_HUMAN,CX6B1_PONAB	10 192,3	1	2	2	3	0.000163	0.267	NCWQNYLDFHR	R	C	0.937	2.65	0.253	1 552,6750
EC_212270_T33Vspike_11_A	Cytochrome c oxidase subunit 6B1 OS=Homo sapiens GN=COX6B1 PE=1 SV=2	CX6B1_HUMAN,CX6B1_PONAB	10 192,3	1	3	3	3	0.000139	0.326	AMTAKGGDISVCEWYQR	K	V	0.997	3.66	0.33	1 971,9053
EC_212270_T33Vspike_11_A	Cytochrome c oxidase subunit 6B1 OS=Homo sapiens GN=COX6B1 PE=1 SV=2	CX6B1_HUMAN,CX6B1_PONAB	10 192,3	1	3	3	3	0.000139	0.326	GGDISVCEWYQR	K	V	0.997	3.6	0.605	1 469,6479
EC_212270_T33Vspike_11_A	Cytochrome c oxidase subunit 6B1 OS=Homo sapiens GN=COX6B1 PE=1 SV=2	CX6B1_HUMAN,CX6B1_PONAB	10 192,3	1	3	3	3	0.000139	0.326	NCWQNYLDFHR	R	C	0.997	3.02	0.457	1 552,6750
EC_212270_T33Vspike_11_B	Cytochrome c oxidase subunit 6B1 OS=Homo sapiens GN=COX6B1 PE=1 SV=2	CX6B1_HUMAN,CX6B1_PONAB	10 192,3	1	3	3	3	0.00014	0.326	AMTAKGGDISVCEWYQR	K	V	0.997	3.3	0.414	1 971,9053
EC_212270_T33Vspike_11_B	Cytochrome c oxidase subunit 6B1 OS=Homo sapiens GN=COX6B1 PE=1 SV=2	CX6B1_HUMAN,CX6B1_PONAB	10 192,3	1	3	3	3	0.00014	0.326	GGDISVCEWYQR	K	V	0.997	3.44	0.558	1 469,6479
EC_212270_T33Vspike_11_B	Cytochrome c oxidase subunit 6B1 OS=Homo sapiens GN=COX6B1 PE=1 SV=2	CX6B1_HUMAN,CX6B1_PONAB	10 192,3	1	3	3	3	0.00014	0.326	NCWQNYLDFHR	R	C	0.997	3.09	0.412	1 552,6750
EC_212270_T33Vspike_12_A	Cytochrome c oxidase subunit 6B1 OS=Homo sapiens GN=COX6B1 PE=1 SV=2	CX6B1_HUMAN,CX6B1_PONAB	10 192,3	1	4	6	8	0.0004	0.64	AMTAKGGDISVCEWYQR	K	V	0.997	3.45	0.256	1 971,9053
EC_212270_T33Vspike_12_A	Cytochrome c oxidase subunit 6B1 OS=Homo sapiens GN=COX6B1 PE=1 SV=2	CX6B1_HUMAN,CX6B1_PONAB	10 192,3	1	4	6	8	0.0004	0.64	GGDISVCEWYQR	K	V	0.396	3.21	0.536	1 469,6479
EC_212270_T33Vspike_12_A	Cytochrome c oxidase subunit 6B1 OS=Homo sapiens GN=COX6B1 PE=1 SV=2	CX6B1_HUMAN,CX6B1_PONAB	10 192,3	1	4	6	8	0.0004	0.64	NCWQNYLDFHR	R	C	0.621	3.45	0.402	1 552,6750
EC_212270_T33Vspike_12_A	Cytochrome c oxidase subunit 6B1 OS=Homo sapiens GN=COX6B1 PE=1 SV=2	CX6B1_HUMAN,CX6B1_PONAB	10 192,3	1	4	6	8	0.0004	0.64	VYQSLCPTSWVTDWDEQRAEGTFPGKI	R	-	0.577	2.16	0.013	3 113,4676
EC_212270_T33Vspike_12_B	Cytochrome c oxidase subunit 6B1 OS=Homo sapiens GN=COX6B1 PE=1 SV=2	CX6B1_HUMAN,CX6B1_PONAB	10 192,3	1	4	4	6	0.00032	0.64	AMTAKGGDISVCEWYQR	K	V	0.845	2.44	0.306	1 971,9053
EC_212270_T33Vspike_12_B	Cytochrome c oxidase subunit 6B1 OS=Homo sapiens GN=COX6B1 PE=1 SV=2	CX6B1_HUMAN,CX6B1_PONAB	10 192,3	1	4	4	6	0.00032	0.64	GGDISVCEWYQR	K	V	0.997	3.13	0.574	1 469,6479
EC_212270_T33Vspike_12_B	Cytochrome c oxidase subunit 6B1 OS=Homo sapiens GN=COX6B1 PE=1 SV=2	CX6B1_HUMAN,CX6B1_PONAB	10 192,3	1	4	4	6	0.00032	0.64	NCWQNYLDFHR	R	C	0.997	2.94	0.432	1 552,6750
EC_212270_T33Vspike_12_B	Cytochrome c oxidase subunit 6B1 OS=Homo sapiens GN=COX6B1 PE=1 SV=2	CX6B1_HUMAN,CX6B1_PONAB	10 192,3	1	4	4	6	0.00032	0.64	VYQSLCPTSWVTDWDEQRAEGTFPGKI	R	-	0.434	2.45	0	3 170,4891
EC_212270_T33Vspike_1_A	Calcyclin-binding protein OS=Bos taurus GN=CACYBP PE=2 SV=1	CYBP_BOVIN,CYBP_HUMAN,CYBP_MACFA,CYBP_MOUSE,CYBP_PONAB,CYBP_RAT	26 332,5	1	2	3	3	0.000129	0.0957	KIYEDGDDDMKR	K	T	0.896	2.22	0.294	1 484,6689
EC_212270_T33Vspike_1_A	Calcyclin-binding protein OS=Bos taurus GN=CACYBP PE=2 SV=1	CYBP_BOVIN,CYBP_HUMAN,CYBP_MACFA,CYBP_MOUSE,CYBP_PONAB,CYBP_RAT	26 332,5	1	2	3	3	0.000129	0.0957	TINKAWVESR	R	E	0.997	3.21	0.344	1 203,6480
EC_212270_T33Vspike_2_A	Calcyclin-binding protein OS=Bos taurus GN=CACYBP PE=2 SV=1	CYBP_BOVIN,CYBP_HUMAN,CYBP_MACFA,CYBP_MOUSE,CYBP_PONAB,CYBP_RAT	26 332,5	1	2	2	2	8.35e-05	0.0957	KIYEDGDDDMKR	K	T	0.955	2.67	0.391	1 484,6689
EC_212270_T33Vspike_2_A	Calcyclin-binding protein OS=Bos taurus GN=CACYBP PE=2 SV=1	CYBP_BOVIN,CYBP_HUMAN,CYBP_MACFA,CYBP_MOUSE,CYBP_PONAB,CYBP_RAT	26 332,5	1	2	2	2	8.35e-05	0.0957	TINKAWVESR	R	E	0.976	2.66	0.197	1 203,6480
EC_212270_T33Vspike_4_A	Calcyclin-binding protein OS=Bos taurus GN=CACYBP PE=2 SV=1	CYBP_BOVIN,CYBP_HUMAN,CYBP_MACFA,CYBP_MOUSE,CYBP_PONAB,CYBP_RAT	26 332,5	0.999	2	2	2	8.05e-05	0.0957	KIYEDGDDDMKR	K	T	0.912	2.39	0.384	1 484,6689
EC_212270_T33Vspike_4_A	Calcyclin-binding protein OS=Bos taurus GN=CACYBP PE=2 SV=1	CYBP_BOVIN,CYBP_HUMAN,CYBP_MACFA,CYBP_MOUSE,CYBP_PONAB,CYBP_RAT	26 332,5	0.999	2	2	2	8.05e-05	0.0957	TINKAWVESR	R	E	0.987	3.26	0.242	1 203,6480
EC_212270_T33Vspike_1_A	Cytochrome c2 OS=Rhodobacter capsulatus (strain ATCC BAA-309 / NBRC 16581 / SB1003) GN=cycA PE=1 SV=1	CYC2_RHOCB	14 280,0	1	7	9	16	0.000688	0.577	GGEDVAAYLASVVK	K	-	0.997	4.76	0.552	1 378,7213
EC_212270_T33Vspike_1_A	Cytochrome c2 OS=Rhodobacter capsulatus (strain ATCC BAA-309 / NBRC 16581 / SB1003) GN=cycA PE=1 SV=1	CYC2_RHOCB	14 280,0	1	7	9	16	0.000688	0.577	LAKGGEDVAAYLASVVK	K	-	0.997	3.95	0.464	1 690,9375
EC_212270_T33Vspike_1_A	Cytochrome c2 OS=Rhodobacter capsulatus (strain ATCC BAA-309 / NBRC 16581 / SB1003) GN=cycA PE=1 SV=1	CYC2_RHOCB	14 280,0	1	7	9	16	0.000688	0.577	TAGTYPEFK	R	Y	0.965	2.66	0.365	1 013,4939
EC_212270_T33Vspike_1_A	Cytochrome c2 OS=Rhodobacter capsulatus (strain ATCC BAA-309 / NBRC 16581 / SB1003) GN=cycA PE=1 SV=1	CYC2_RHOCB	14 280,0	1	7	9	16	0.000688	0.577	TCHSIIAPDGTEIVK	K	G	0.989	3.15	0.4	1 640,8315
EC_212270_T33Vspike_1_A	Cytochrome c2 OS=Rhodobacter capsulatus (strain ATCC BAA-309 / NBRC 16581 / SB1003) GN=cycA PE=1 SV=1	CYC2_RHOCB	14 280,0	1	7	9	16	0.000688	0.577	TGMAFKLAK	K	G	0.978	2.08	0.224	966.544
EC_212270_T33Vspike_1_A	Cytochrome c2 OS=Rhodobacter capsulatus (strain ATCC BAA-309 / NBRC 16581 / SB1003) GN=cycA PE=1 SV=1	CYC2_RHOCB	14 280,0	1	7	9	16	0.000688	0.577	YKDSIVALGASGFAWTEEDIATYVK	K	D	0.997	4.51	0.584	2 734,3612
EC_212270_T33Vspike_1_A	Cytochrome c2 OS=Rhodobacter capsulatus (strain ATCC BAA-309 / NBRC 16581 / SB1003) GN=cycA PE=1 SV=1	CYC2_RHOCB	14 280,0	1	7	9	16	0.000688	0.577	YKDSIVALGASGFAWTEEDIATYVKDPGAFLK	K	E	0.997	3.92	0.409	3 462,7471
EC_212270_T33Vspike_1_B	Cytochrome c2 OS=Rhodobacter capsulatus (strain ATCC BAA-309 / NBRC 16581 / SB1003) GN=cycA PE=1 SV=1	CYC2_RHOCB	14 280,0	1	7	10	15	0.000682	0.577	DPGAFLK	K	E	0.825	2.23	0.161	747.404
EC_212270_T33Vspike_1_B	Cytochrome c2 OS=Rhodobacter capsulatus (strain ATCC BAA-309 / NBRC 16581 / SB1003) GN=cycA PE=1 SV=1	CYC2_RHOCB	14 280,0	1	7	10	15	0.000682	0.577	GGEDVAAYLASVVK	K	-	0.997	4.8	0.591	1 378,7213
EC_212270_T33Vspike_1_B	Cytochrome c2 OS=Rhodobacter capsulatus (strain ATCC BAA-309 / NBRC 16581 / SB1003) GN=cycA PE=1 SV=1	CYC2_RHOCB	14 280,0	1	7	10	15	0.000682	0.577	LAKGGEDVAAYLASVVK	K	-	0.997	4.24	0.537	1 690,9375
EC_212270_T33Vspike_1_B	Cytochrome c2 OS=Rhodobacter capsulatus (strain ATCC BAA-309 / NBRC 16581 / SB1003) GN=cycA PE=1 SV=1	CYC2_RHOCB	14 280,0	1	7	10	15	0.000682	0.577	TAGTYPEFK	R	Y	0.938	2.16	0.391	1 013,4939
EC_212270_T33Vspike_1_B	Cytochrome c2 OS=Rhodobacter capsulatus (strain ATCC BAA-309 / NBRC 16581 / SB1003) GN=cycA PE=1 SV=1	CYC2_RHOCB	14 280,0	1	7	10	15	0.000682	0.577	TCHSIIAPDGTEIVK	K	G	0.99	3.45	0.409	1 640,8315
EC_212270_T33Vspike_1_B	Cytochrome c2 OS=Rhodobacter capsulatus (strain ATCC BAA-309 / NBRC 16581 / SB1003) GN=cycA PE=1 SV=1	CYC2_RHOCB	14 280,0	1	7	10	15	0.000682	0.577	TGMAFKLAK	K	G	0.985	2.13	0.307	966.544
EC_212270_T33Vspike_1_B	Cytochrome c2 OS=Rhodobacter capsulatus (strain ATCC BAA-309 / NBRC 16581 / SB1003) GN=cycA PE=1 SV=1	CYC2_RHOCB	14 280,0	1	7	10	15	0.000682	0.577	YKDSIVALGASGFAWTEEDIATYVK	K	D	0.997	4.91	0.528	2 734,3612
EC_212270_T33Vspike_2_A	Cytochrome c2 OS=Rhodobacter capsulatus (strain ATCC BAA-309 / NBRC 16581 / SB1003) GN=cycA PE=1 SV=1	CYC2_RHOCB	14 280,0	1	6	8	12	0.000501	0.394	DPGAFLK	K	E	0.816	2.22	0.204	747.404
EC_212270_T33Vspike_2_A	Cytochrome c2 OS=Rhodobacter capsulatus (strain ATCC BAA-309 / NBRC 16581 / SB1003) GN=cycA PE=1 SV=1	CYC2_RHOCB	14 280,0	1	6	8	12	0.000501	0.394	GGEDVAAYLASVVK	K	-	0.997	4.55	0.517	1 378,7213
EC_212270_T33Vspike_2_A	Cytochrome c2 OS=Rhodobacter capsulatus (strain ATCC BAA-309 / NBRC 16581 / SB1003) GN=cycA PE=1 SV=1	CYC2_RHOCB	14 280,0	1	6	8	12	0.000501	0.394	LAKGGEDVAAYLASVVK	K	-	0.997	3.77	0.271	1 690,9375
EC_212270_T33Vspike_2_A	Cytochrome c2 OS=Rhodobacter capsulatus (strain ATCC BAA-309 / NBRC 16581 / SB1003) GN=cycA PE=1 SV=1	CYC2_RHOCB	14 280,0	1	6	8	12	0.000501	0.394	TAGTYPEFK	R	Y	0.965	2.38	0.455	1 013,4939
EC_212270_T33Vspike_2_A	Cytochrome c2 OS=Rhodobacter capsulatus (strain ATCC BAA-309 / NBRC 16581 / SB1003) GN=cycA PE=1 SV=1	CYC2_RHOCB	14 280,0	1	6	8	12	0.000501	0.394	TCHSIIAPDGTEIVK	K	G	0.889	2.82	0.243	1 640,8315
EC_212270_T33Vspike_2_A	Cytochrome c2 OS=Rhodobacter capsulatus (strain ATCC BAA-309 / NBRC 16581 / SB1003) GN=cycA PE=1 SV=1	CYC2_RHOCB	14 280,0	1	6	8	12	0.000501	0.394	TGMAFKLAK	K	G	0.953	2.32	0.246	966.544
EC_212270_T33Vspike_2_B	Cytochrome c2 OS=Rhodobacter capsulatus (strain ATCC BAA-309 / NBRC 16581 / SB1003) GN=cycA PE=1 SV=1	CYC2_RHOCB	14 280,0	1	4	6	9	0.000392	0.234	GGEDVAAYLASVVK	K	-	0.997	4.69	0.548	1 378,7213
EC_212270_T33Vspike_2_B	Cytochrome c2 OS=Rhodobacter capsulatus (strain ATCC BAA-309 / NBRC 16581 / SB1003) GN=cycA PE=1 SV=1	CYC2_RHOCB	14 280,0	1	4	6	9	0.000392	0.234	LAKGGEDVAAYLASVVK	K	-	0.997	3.45	0.525	1 690,9375
EC_212270_T33Vspike_2_B	Cytochrome c2 OS=Rhodobacter capsulatus (strain ATCC BAA-309 / NBRC 16581 / SB1003) GN=cycA PE=1 SV=1	CYC2_RHOCB	14 280,0	1	4	6	9	0.000392	0.234	TAGTYPEFK	R	Y	0.972	2.64	0.465	1 013,4939
EC_212270_T33Vspike_2_B	Cytochrome c2 OS=Rhodobacter capsulatus (strain ATCC BAA-309 / NBRC 16581 / SB1003) GN=cycA PE=1 SV=1	CYC2_RHOCB	14 280,0	1	4	6	9	0.000392	0.234	TGMAFKLAK	K	G	0.878	2.17	0.322	966.544
EC_212270_T33Vspike_3_A	Cytochrome c2 OS=Rhodobacter capsulatus (strain ATCC BAA-309 / NBRC 16581 / SB1003) GN=cycA PE=1 SV=1	CYC2_RHOCB	14 280,0	1	10	11	27	0.00136	0.65	DPGAFLK	K	E	0.573	2.22	0.155	747.404
EC_212270_T33Vspike_3_A	Cytochrome c2 OS=Rhodobacter capsulatus (strain ATCC BAA-309 / NBRC 16581 / SB1003) GN=cycA PE=1 SV=1	CYC2_RHOCB	14 280,0	1	10	11	27	0.00136	0.65	GEKEFNK	K	C	0.484	2.65	0.109	851.426
EC_212270_T33Vspike_3_A	Cytochrome c2 OS=Rhodobacter capsulatus (strain ATCC BAA-309 / NBRC 16581 / SB1003) GN=cycA PE=1 SV=1	CYC2_RHOCB	14 280,0	1	10	11	27	0.00136	0.65	GGEDVAAYLASVVK	K	-	0.997	5.25	0.575	1 378,7213
EC_212270_T33Vspike_3_A	Cytochrome c2 OS=Rhodobacter capsulatus (strain ATCC BAA-309 / NBRC 16581 / SB1003) GN=cycA PE=1 SV=1	CYC2_RHOCB	14 280,0	1	10	11	27	0.00136	0.65	LAKGGEDVAAYLASVVK	K	-	0.997	4.7	0.584	1 690,9375
EC_212270_T33Vspike_3_A	Cytochrome c2 OS=Rhodobacter capsulatus (strain ATCC BAA-309 / NBRC 16581 / SB1003) GN=cycA PE=1 SV=1	CYC2_RHOCB	14 280,0	1	10	11	27	0.00136	0.65	TAGTYPEFK	R	Y	0.916	2.33	0.464	1 013,4939
EC_212270_T33Vspike_3_A	Cytochrome c2 OS=Rhodobacter capsulatus (strain ATCC BAA-309 / NBRC 16581 / SB1003) GN=cycA PE=1 SV=1	CYC2_RHOCB	14 280,0	1	10	11	27	0.00136	0.65	TAGTYPEFKYK	R	D	0.308	1.38	0.181	1 304,6522
EC_212270_T33Vspike_3_A	Cytochrome c2 OS=Rhodobacter capsulatus (strain ATCC BAA-309 / NBRC 16581 / SB1003) GN=cycA PE=1 SV=1	CYC2_RHOCB	14 280,0	1	10	11	27	0.00136	0.65	TCHSIIAPDGTEIVK	K	G	0.997	3.91	0.503	1 640,8315
EC_212270_T33Vspike_3_A	Cytochrome c2 OS=Rhodobacter capsulatus (strain ATCC BAA-309 / NBRC 16581 / SB1003) GN=cycA PE=1 SV=1	CYC2_RHOCB	14 280,0	1	10	11	27	0.00136	0.65	TCHSIIAPDGTEIVKGAK	K	T	0.997	3.48	0.489	1 896,9851
EC_212270_T33Vspike_3_A	Cytochrome c2 OS=Rhodobacter capsulatus (strain ATCC BAA-309 / NBRC 16581 / SB1003) GN=cycA PE=1 SV=1	CYC2_RHOCB	14 280,0	1	10	11	27	0.00136	0.65	TGMAFKLAK	K	G	0.897	2.69	0.254	966.544
EC_212270_T33Vspike_3_A	Cytochrome c2 OS=Rhodobacter capsulatus (strain ATCC BAA-309 / NBRC 16581 / SB1003) GN=cycA PE=1 SV=1	CYC2_RHOCB	14 280,0	1	10	11	27	0.00136	0.65	YKDSIVALGASGFAWTEEDIATYVK	K	D	0.997	4.13	0.461	2 734,3612
EC_212270_T33Vspike_3_B	Cytochrome c2 OS=Rhodobacter capsulatus (strain ATCC BAA-309 / NBRC 16581 / SB1003) GN=cycA PE=1 SV=1	CYC2_RHOCB	14 280,0	1	9	12	25	0.00131	0.599	DPGAFLK	K	E	0.762	2.31	0.197	747.404
EC_212270_T33Vspike_3_B	Cytochrome c2 OS=Rhodobacter capsulatus (strain ATCC BAA-309 / NBRC 16581 / SB1003) GN=cycA PE=1 SV=1	CYC2_RHOCB	14 280,0	1	9	12	25	0.00131	0.599	GGEDVAAYLASVVK	K	-	0.997	4.9	0.525	1 378,7213
EC_212270_T33Vspike_3_B	Cytochrome c2 OS=Rhodobacter capsulatus (strain ATCC BAA-309 / NBRC 16581 / SB1003) GN=cycA PE=1 SV=1	CYC2_RHOCB	14 280,0	1	9	12	25	0.00131	0.599	LAKGGEDVAAYLASVVK	K	-	0.997	3.77	0.528	1 690,9375
EC_212270_T33Vspike_3_B	Cytochrome c2 OS=Rhodobacter capsulatus (strain ATCC BAA-309 / NBRC 16581 / SB1003) GN=cycA PE=1 SV=1	CYC2_RHOCB	14 280,0	1	9	12	25	0.00131	0.599	TAGTYPEFK	R	Y	0.92	2.44	0.457	1 013,4939
EC_212270_T33Vspike_3_B	Cytochrome c2 OS=Rhodobacter capsulatus (strain ATCC BAA-309 / NBRC 16581 / SB1003) GN=cycA PE=1 SV=1	CYC2_RHOCB	14 280,0	1	9	12	25	0.00131	0.599	TAGTYPEFKYK	R	D	0.188	1.43	0.18	1 304,6522
EC_212270_T33Vspike_3_B	Cytochrome c2 OS=Rhodobacter capsulatus (strain ATCC BAA-309 / NBRC 16581 / SB1003) GN=cycA PE=1 SV=1	CYC2_RHOCB	14 280,0	1	9	12	25	0.00131	0.599	TCHSIIAPDGTEIVK	K	G	0.725	2.28	0.261	1 640,8315
EC_212270_T33Vspike_3_B	Cytochrome c2 OS=Rhodobacter capsulatus (strain ATCC BAA-309 / NBRC 16581 / SB1003) GN=cycA PE=1 SV=1	CYC2_RHOCB	14 280,0	1	9	12	25	0.00131	0.599	TCHSIIAPDGTEIVKGAK	K	T	0.861	2.91	0.249	1 896,9851
EC_212270_T33Vspike_3_B	Cytochrome c2 OS=Rhodobacter capsulatus (strain ATCC BAA-309 / NBRC 16581 / SB1003) GN=cycA PE=1 SV=1	CYC2_RHOCB	14 280,0	1	9	12	25	0.00131	0.599	TGMAFKLAK	K	G	0.997	2.39	0.349	966.544
EC_212270_T33Vspike_3_B	Cytochrome c2 OS=Rhodobacter capsulatus (strain ATCC BAA-309 / NBRC 16581 / SB1003) GN=cycA PE=1 SV=1	CYC2_RHOCB	14 280,0	1	9	12	25	0.00131	0.599	YKDSIVALGASGFAWTEEDIATYVK	K	D	0.997	5.39	0.468	2 734,3612
EC_212270_T33Vspike_4_A	Cytochrome c2 OS=Rhodobacter capsulatus (strain ATCC BAA-309 / NBRC 16581 / SB1003) GN=cycA PE=1 SV=1	CYC2_RHOCB	14 280,0	1	4	5	7	0.000282	0.372	GGEDVAAYLASVVK	K	-	0.997	4.16	0.53	1 378,7213
EC_212270_T33Vspike_4_A	Cytochrome c2 OS=Rhodobacter capsulatus (strain ATCC BAA-309 / NBRC 16581 / SB1003) GN=cycA PE=1 SV=1	CYC2_RHOCB	14 280,0	1	4	5	7	0.000282	0.372	LAKGGEDVAAYLASVVK	K	-	0.997	3.06	0.481	1 690,9375
EC_212270_T33Vspike_4_A	Cytochrome c2 OS=Rhodobacter capsulatus (strain ATCC BAA-309 / NBRC 16581 / SB1003) GN=cycA PE=1 SV=1	CYC2_RHOCB	14 280,0	1	4	5	7	0.000282	0.372	TAGTYPEFK	R	Y	0.924	2.23	0.302	1 013,4939
EC_212270_T33Vspike_4_A	Cytochrome c2 OS=Rhodobacter capsulatus (strain ATCC BAA-309 / NBRC 16581 / SB1003) GN=cycA PE=1 SV=1	CYC2_RHOCB	14 280,0	1	4	5	7	0.000282	0.372	YKDSIVALGASGFAWTEEDIATYVK	K	D	0.997	4.59	0.465	2 734,3612
EC_212270_T33Vspike_4_B	Cytochrome c2 OS=Rhodobacter capsulatus (strain ATCC BAA-309 / NBRC 16581 / SB1003) GN=cycA PE=1 SV=1	CYC2_RHOCB	14 280,0	1	5	7	9	0.000357	0.482	GGEDVAAYLASVVK	K	-	0.997	4.57	0.49	1 378,7213
EC_212270_T33Vspike_4_B	Cytochrome c2 OS=Rhodobacter capsulatus (strain ATCC BAA-309 / NBRC 16581 / SB1003) GN=cycA PE=1 SV=1	CYC2_RHOCB	14 280,0	1	5	7	9	0.000357	0.482	LAKGGEDVAAYLASVVK	K	-	0.997	3.92	0.423	1 690,9375
EC_212270_T33Vspike_4_B	Cytochrome c2 OS=Rhodobacter capsulatus (strain ATCC BAA-309 / NBRC 16581 / SB1003) GN=cycA PE=1 SV=1	CYC2_RHOCB	14 280,0	1	5	7	9	0.000357	0.482	TAGTYPEFK	R	Y	0.923	2.33	0.332	1 013,4939
EC_212270_T33Vspike_4_B	Cytochrome c2 OS=Rhodobacter capsulatus (strain ATCC BAA-309 / NBRC 16581 / SB1003) GN=cycA PE=1 SV=1	CYC2_RHOCB	14 280,0	1	5	7	9	0.000357	0.482	TCHSIIAPDGTEIVK	K	G	0.993	3.14	0.468	1 640,8315
EC_212270_T33Vspike_4_B	Cytochrome c2 OS=Rhodobacter capsulatus (strain ATCC BAA-309 / NBRC 16581 / SB1003) GN=cycA PE=1 SV=1	CYC2_RHOCB	14 280,0	1	5	7	9	0.000357	0.482	YKDSIVALGASGFAWTEEDIATYVK	K	D	0.997	4.06	0.41	2 734,3612
EC_212270_T33Vspike_5_A	Cytochrome c2 OS=Rhodobacter capsulatus (strain ATCC BAA-309 / NBRC 16581 / SB1003) GN=cycA PE=1 SV=1	CYC2_RHOCB	14 280,0	1	5	7	10	0.000423	0.482	GGEDVAAYLASVVK	K	-	0.997	4.64	0.544	1 378,7213
EC_212270_T33Vspike_5_A	Cytochrome c2 OS=Rhodobacter capsulatus (strain ATCC BAA-309 / NBRC 16581 / SB1003) GN=cycA PE=1 SV=1	CYC2_RHOCB	14 280,0	1	5	7	10	0.000423	0.482	LAKGGEDVAAYLASVVK	K	-	0.997	3.8	0.508	1 690,9375
EC_212270_T33Vspike_5_A	Cytochrome c2 OS=Rhodobacter capsulatus (strain ATCC BAA-309 / NBRC 16581 / SB1003) GN=cycA PE=1 SV=1	CYC2_RHOCB	14 280,0	1	5	7	10	0.000423	0.482	TAGTYPEFK	R	Y	0.982	2.86	0.459	1 013,4939
EC_212270_T33Vspike_5_A	Cytochrome c2 OS=Rhodobacter capsulatus (strain ATCC BAA-309 / NBRC 16581 / SB1003) GN=cycA PE=1 SV=1	CYC2_RHOCB	14 280,0	1	5	7	10	0.000423	0.482	TCHSIIAPDGTEIVK	K	G	0.955	2.5	0.366	1 640,8315
EC_212270_T33Vspike_5_A	Cytochrome c2 OS=Rhodobacter capsulatus (strain ATCC BAA-309 / NBRC 16581 / SB1003) GN=cycA PE=1 SV=1	CYC2_RHOCB	14 280,0	1	5	7	10	0.000423	0.482	YKDSIVALGASGFAWTEEDIATYVK	K	D	0.997	3.31	0.406	2 734,3612
EC_212270_T33Vspike_5_B	Cytochrome c2 OS=Rhodobacter capsulatus (strain ATCC BAA-309 / NBRC 16581 / SB1003) GN=cycA PE=1 SV=1	CYC2_RHOCB	14 280,0	1	3	3	5	0.000255	0.19	GGEDVAAYLASVVK	K	-	0.997	5.32	0.573	1 378,7213
EC_212270_T33Vspike_5_B	Cytochrome c2 OS=Rhodobacter capsulatus (strain ATCC BAA-309 / NBRC 16581 / SB1003) GN=cycA PE=1 SV=1	CYC2_RHOCB	14 280,0	1	3	3	5	0.000255	0.19	LAKGGEDVAAYLASVVK	K	-	0.997	3.69	0.514	1 690,9375
EC_212270_T33Vspike_5_B	Cytochrome c2 OS=Rhodobacter capsulatus (strain ATCC BAA-309 / NBRC 16581 / SB1003) GN=cycA PE=1 SV=1	CYC2_RHOCB	14 280,0	1	3	3	5	0.000255	0.19	TAGTYPEFK	R	Y	0.921	2.28	0.418	1 013,4939
EC_212270_T33Vspike_6_A	Cytochrome c2 OS=Rhodobacter capsulatus (strain ATCC BAA-309 / NBRC 16581 / SB1003) GN=cycA PE=1 SV=1	CYC2_RHOCB	14 280,0	1	3	5	10	0.000553	0.168	GGEDVAAYLASVVK	K	-	0.997	4.92	0.569	1 378,7213
EC_212270_T33Vspike_6_A	Cytochrome c2 OS=Rhodobacter capsulatus (strain ATCC BAA-309 / NBRC 16581 / SB1003) GN=cycA PE=1 SV=1	CYC2_RHOCB	14 280,0	1	3	5	10	0.000553	0.168	LAKGGEDVAAYLASVVK	K	-	0.997	3.91	0.209	1 690,9375
EC_212270_T33Vspike_6_A	Cytochrome c2 OS=Rhodobacter capsulatus (strain ATCC BAA-309 / NBRC 16581 / SB1003) GN=cycA PE=1 SV=1	CYC2_RHOCB	14 280,0	1	3	5	10	0.000553	0.168	TGMAFKLAK	K	G	0.983	2.79	0.231	966.544
EC_212270_T33Vspike_6_B	Cytochrome c2 OS=Rhodobacter capsulatus (strain ATCC BAA-309 / NBRC 16581 / SB1003) GN=cycA PE=1 SV=1	CYC2_RHOCB	14 280,0	1	4	6	14	0.000839	0.321	GGEDVAAYLASVVK	K	-	0.997	4.77	0.581	1 378,7213
EC_212270_T33Vspike_6_B	Cytochrome c2 OS=Rhodobacter capsulatus (strain ATCC BAA-309 / NBRC 16581 / SB1003) GN=cycA PE=1 SV=1	CYC2_RHOCB	14 280,0	1	4	6	14	0.000839	0.321	LAKGGEDVAAYLASVVK	K	-	0.997	3.94	0.55	1 690,9375
EC_212270_T33Vspike_6_B	Cytochrome c2 OS=Rhodobacter capsulatus (strain ATCC BAA-309 / NBRC 16581 / SB1003) GN=cycA PE=1 SV=1	CYC2_RHOCB	14 280,0	1	4	6	14	0.000839	0.321	TAGTYPEFK	R	Y	0.946	2.09	0.375	1 013,4939
EC_212270_T33Vspike_6_B	Cytochrome c2 OS=Rhodobacter capsulatus (strain ATCC BAA-309 / NBRC 16581 / SB1003) GN=cycA PE=1 SV=1	CYC2_RHOCB	14 280,0	1	4	6	14	0.000839	0.321	TCHSIIAPDGTEIVKGAK	K	T	0.997	3.88	0.44	1 896,9851
EC_212270_T33Vspike_7_A	Cytochrome c2 OS=Rhodobacter capsulatus (strain ATCC BAA-309 / NBRC 16581 / SB1003) GN=cycA PE=1 SV=1	CYC2_RHOCB	14 280,0	1	4	6	12	0.000542	0.241	DPGAFLK	K	E	0.9	2.53	0.257	747.404
EC_212270_T33Vspike_7_A	Cytochrome c2 OS=Rhodobacter capsulatus (strain ATCC BAA-309 / NBRC 16581 / SB1003) GN=cycA PE=1 SV=1	CYC2_RHOCB	14 280,0	1	4	6	12	0.000542	0.241	GGEDVAAYLASVVK	K	-	0.997	4.47	0.529	1 378,7213
EC_212270_T33Vspike_7_A	Cytochrome c2 OS=Rhodobacter capsulatus (strain ATCC BAA-309 / NBRC 16581 / SB1003) GN=cycA PE=1 SV=1	CYC2_RHOCB	14 280,0	1	4	6	12	0.000542	0.241	LAKGGEDVAAYLASVVK	K	-	0.997	3.89	0.436	1 690,9375
EC_212270_T33Vspike_7_A	Cytochrome c2 OS=Rhodobacter capsulatus (strain ATCC BAA-309 / NBRC 16581 / SB1003) GN=cycA PE=1 SV=1	CYC2_RHOCB	14 280,0	1	4	6	12	0.000542	0.241	TAGTYPEFK	R	Y	0.94	2.4	0.475	1 013,4939
EC_212270_T33Vspike_7_B	Cytochrome c2 OS=Rhodobacter capsulatus (strain ATCC BAA-309 / NBRC 16581 / SB1003) GN=cycA PE=1 SV=1	CYC2_RHOCB	14 280,0	1	5	7	16	0.000727	0.482	GGEDVAAYLASVVK	K	-	0.997	4.94	0.52	1 378,7213
EC_212270_T33Vspike_7_B	Cytochrome c2 OS=Rhodobacter capsulatus (strain ATCC BAA-309 / NBRC 16581 / SB1003) GN=cycA PE=1 SV=1	CYC2_RHOCB	14 280,0	1	5	7	16	0.000727	0.482	LAKGGEDVAAYLASVVK	K	-	0.997	3.74	0.494	1 690,9375
EC_212270_T33Vspike_7_B	Cytochrome c2 OS=Rhodobacter capsulatus (strain ATCC BAA-309 / NBRC 16581 / SB1003) GN=cycA PE=1 SV=1	CYC2_RHOCB	14 280,0	1	5	7	16	0.000727	0.482	TAGTYPEFK	R	Y	0.953	2.21	0.435	1 013,4939
EC_212270_T33Vspike_7_B	Cytochrome c2 OS=Rhodobacter capsulatus (strain ATCC BAA-309 / NBRC 16581 / SB1003) GN=cycA PE=1 SV=1	CYC2_RHOCB	14 280,0	1	5	7	16	0.000727	0.482	TCHSIIAPDGTEIVK	K	G	0.977	2.66	0.392	1 640,8315
EC_212270_T33Vspike_7_B	Cytochrome c2 OS=Rhodobacter capsulatus (strain ATCC BAA-309 / NBRC 16581 / SB1003) GN=cycA PE=1 SV=1	CYC2_RHOCB	14 280,0	1	5	7	16	0.000727	0.482	YKDSIVALGASGFAWTEEDIATYVK	K	D	0.997	4.05	0.367	2 734,3612
EC_212270_T33Vspike_8_A	Cytochrome c2 OS=Rhodobacter capsulatus (strain ATCC BAA-309 / NBRC 16581 / SB1003) GN=cycA PE=1 SV=1	CYC2_RHOCB	14 280,0	1	8	9	14	0.000657	0.599	DPGAFLK	K	E	0.9	2.36	0.227	747.404
EC_212270_T33Vspike_8_A	Cytochrome c2 OS=Rhodobacter capsulatus (strain ATCC BAA-309 / NBRC 16581 / SB1003) GN=cycA PE=1 SV=1	CYC2_RHOCB	14 280,0	1	8	9	14	0.000657	0.599	GGEDVAAYLASVVK	K	-	0.997	4.47	0.556	1 378,7213
EC_212270_T33Vspike_8_A	Cytochrome c2 OS=Rhodobacter capsulatus (strain ATCC BAA-309 / NBRC 16581 / SB1003) GN=cycA PE=1 SV=1	CYC2_RHOCB	14 280,0	1	8	9	14	0.000657	0.599	LAKGGEDVAAYLASVVK	K	-	0.997	4.24	0.565	1 690,9375
EC_212270_T33Vspike_8_A	Cytochrome c2 OS=Rhodobacter capsulatus (strain ATCC BAA-309 / NBRC 16581 / SB1003) GN=cycA PE=1 SV=1	CYC2_RHOCB	14 280,0	1	8	9	14	0.000657	0.599	TAGTYPEFK	R	Y	0.892	2.38	0.449	1 013,4939
EC_212270_T33Vspike_8_A	Cytochrome c2 OS=Rhodobacter capsulatus (strain ATCC BAA-309 / NBRC 16581 / SB1003) GN=cycA PE=1 SV=1	CYC2_RHOCB	14 280,0	1	8	9	14	0.000657	0.599	TCHSIIAPDGTEIVK	K	G	0.997	3.62	0.448	1 640,8315
EC_212270_T33Vspike_8_A	Cytochrome c2 OS=Rhodobacter capsulatus (strain ATCC BAA-309 / NBRC 16581 / SB1003) GN=cycA PE=1 SV=1	CYC2_RHOCB	14 280,0	1	8	9	14	0.000657	0.599	TCHSIIAPDGTEIVKGAK	K	T	0.997	4.09	0.511	1 896,9851
EC_212270_T33Vspike_8_A	Cytochrome c2 OS=Rhodobacter capsulatus (strain ATCC BAA-309 / NBRC 16581 / SB1003) GN=cycA PE=1 SV=1	CYC2_RHOCB	14 280,0	1	8	9	14	0.000657	0.599	TGMAFKLAK	K	G	0.887	2.65	0.28	966.544
EC_212270_T33Vspike_8_A	Cytochrome c2 OS=Rhodobacter capsulatus (strain ATCC BAA-309 / NBRC 16581 / SB1003) GN=cycA PE=1 SV=1	CYC2_RHOCB	14 280,0	1	8	9	14	0.000657	0.599	YKDSIVALGASGFAWTEEDIATYVK	K	D	0.997	4.46	0.497	2 734,3612
EC_212270_T33Vspike_8_B	Cytochrome c2 OS=Rhodobacter capsulatus (strain ATCC BAA-309 / NBRC 16581 / SB1003) GN=cycA PE=1 SV=1	CYC2_RHOCB	14 280,0	1	7	9	16	0.000767	0.555	DPGAFLK	K	E	0.9	2.62	0.249	747.404
EC_212270_T33Vspike_8_B	Cytochrome c2 OS=Rhodobacter capsulatus (strain ATCC BAA-309 / NBRC 16581 / SB1003) GN=cycA PE=1 SV=1	CYC2_RHOCB	14 280,0	1	7	9	16	0.000767	0.555	GGEDVAAYLASVVK	K	-	0.997	5.18	0.406	1 378,7213
EC_212270_T33Vspike_8_B	Cytochrome c2 OS=Rhodobacter capsulatus (strain ATCC BAA-309 / NBRC 16581 / SB1003) GN=cycA PE=1 SV=1	CYC2_RHOCB	14 280,0	1	7	9	16	0.000767	0.555	LAKGGEDVAAYLASVVK	K	-	0.997	3.92	0.544	1 690,9375
EC_212270_T33Vspike_8_B	Cytochrome c2 OS=Rhodobacter capsulatus (strain ATCC BAA-309 / NBRC 16581 / SB1003) GN=cycA PE=1 SV=1	CYC2_RHOCB	14 280,0	1	7	9	16	0.000767	0.555	TAGTYPEFK	R	Y	0.965	2.56	0.45	1 013,4939
EC_212270_T33Vspike_8_B	Cytochrome c2 OS=Rhodobacter capsulatus (strain ATCC BAA-309 / NBRC 16581 / SB1003) GN=cycA PE=1 SV=1	CYC2_RHOCB	14 280,0	1	7	9	16	0.000767	0.555	TCHSIIAPDGTEIVK	K	G	0.997	3.1	0.474	1 640,8315
EC_212270_T33Vspike_8_B	Cytochrome c2 OS=Rhodobacter capsulatus (strain ATCC BAA-309 / NBRC 16581 / SB1003) GN=cycA PE=1 SV=1	CYC2_RHOCB	14 280,0	1	7	9	16	0.000767	0.555	TCHSIIAPDGTEIVKGAK	K	T	0.856	2.34	0.234	1 896,9851
EC_212270_T33Vspike_8_B	Cytochrome c2 OS=Rhodobacter capsulatus (strain ATCC BAA-309 / NBRC 16581 / SB1003) GN=cycA PE=1 SV=1	CYC2_RHOCB	14 280,0	1	7	9	16	0.000767	0.555	YKDSIVALGASGFAWTEEDIATYVK	K	D	0.997	4.7	0.531	2 734,3612
EC_212270_T33Vspike_9_A	Cytochrome c2 OS=Rhodobacter capsulatus (strain ATCC BAA-309 / NBRC 16581 / SB1003) GN=cycA PE=1 SV=1	CYC2_RHOCB	14 280,0	1	5	7	12	0.000582	0.504	GGEDVAAYLASVVK	K	-	0.997	5.14	0.56	1 378,7213
EC_212270_T33Vspike_9_A	Cytochrome c2 OS=Rhodobacter capsulatus (strain ATCC BAA-309 / NBRC 16581 / SB1003) GN=cycA PE=1 SV=1	CYC2_RHOCB	14 280,0	1	5	7	12	0.000582	0.504	LAKGGEDVAAYLASVVK	K	-	0.997	2.98	0.496	1 690,9375
EC_212270_T33Vspike_9_A	Cytochrome c2 OS=Rhodobacter capsulatus (strain ATCC BAA-309 / NBRC 16581 / SB1003) GN=cycA PE=1 SV=1	CYC2_RHOCB	14 280,0	1	5	7	12	0.000582	0.504	TAGTYPEFK	R	Y	0.997	2.63	0.477	1 013,4939
EC_212270_T33Vspike_9_A	Cytochrome c2 OS=Rhodobacter capsulatus (strain ATCC BAA-309 / NBRC 16581 / SB1003) GN=cycA PE=1 SV=1	CYC2_RHOCB	14 280,0	1	5	7	12	0.000582	0.504	TCHSIIAPDGTEIVKGAK	K	T	0.916	2.4	0.34	1 896,9851
EC_212270_T33Vspike_9_A	Cytochrome c2 OS=Rhodobacter capsulatus (strain ATCC BAA-309 / NBRC 16581 / SB1003) GN=cycA PE=1 SV=1	CYC2_RHOCB	14 280,0	1	5	7	12	0.000582	0.504	YKDSIVALGASGFAWTEEDIATYVK	K	D	0.997	4.57	0.447	2 734,3612
EC_212270_T33Vspike_9_B	Cytochrome c2 OS=Rhodobacter capsulatus (strain ATCC BAA-309 / NBRC 16581 / SB1003) GN=cycA PE=1 SV=1	CYC2_RHOCB	14 280,0	1	5	7	11	0.000567	0.482	GGEDVAAYLASVVK	K	-	0.997	4.85	0.54	1 378,7213
EC_212270_T33Vspike_9_B	Cytochrome c2 OS=Rhodobacter capsulatus (strain ATCC BAA-309 / NBRC 16581 / SB1003) GN=cycA PE=1 SV=1	CYC2_RHOCB	14 280,0	1	5	7	11	0.000567	0.482	LAKGGEDVAAYLASVVK	K	-	0.997	3.36	0.479	1 690,9375
EC_212270_T33Vspike_9_B	Cytochrome c2 OS=Rhodobacter capsulatus (strain ATCC BAA-309 / NBRC 16581 / SB1003) GN=cycA PE=1 SV=1	CYC2_RHOCB	14 280,0	1	5	7	11	0.000567	0.482	TAGTYPEFK	R	Y	0.997	2.83	0.481	1 013,4939
EC_212270_T33Vspike_9_B	Cytochrome c2 OS=Rhodobacter capsulatus (strain ATCC BAA-309 / NBRC 16581 / SB1003) GN=cycA PE=1 SV=1	CYC2_RHOCB	14 280,0	1	5	7	11	0.000567	0.482	TCHSIIAPDGTEIVK	K	G	0.997	2.92	0.505	1 640,8315
EC_212270_T33Vspike_9_B	Cytochrome c2 OS=Rhodobacter capsulatus (strain ATCC BAA-309 / NBRC 16581 / SB1003) GN=cycA PE=1 SV=1	CYC2_RHOCB	14 280,0	1	5	7	11	0.000567	0.482	YKDSIVALGASGFAWTEEDIATYVK	K	D	0.997	3.22	0.427	2 734,3612
EC_212270_T33Vspike_10_A	Cytochrome c2 OS=Rhodobacter capsulatus (strain ATCC BAA-309 / NBRC 16581 / SB1003) GN=cycA PE=1 SV=1	CYC2_RHOCB	14 280,0	1	5	7	15	0.000813	0.321	GGEDVAAYLASVVK	K	-	0.997	5.11	0.601	1 378,7213
EC_212270_T33Vspike_10_A	Cytochrome c2 OS=Rhodobacter capsulatus (strain ATCC BAA-309 / NBRC 16581 / SB1003) GN=cycA PE=1 SV=1	CYC2_RHOCB	14 280,0	1	5	7	15	0.000813	0.321	LAKGGEDVAAYLASVVK	K	-	0.997	4.09	0.24	1 690,9375
EC_212270_T33Vspike_10_A	Cytochrome c2 OS=Rhodobacter capsulatus (strain ATCC BAA-309 / NBRC 16581 / SB1003) GN=cycA PE=1 SV=1	CYC2_RHOCB	14 280,0	1	5	7	15	0.000813	0.321	TAGTYPEFK	R	Y	0.901	2.46	0.381	1 013,4939
EC_212270_T33Vspike_10_A	Cytochrome c2 OS=Rhodobacter capsulatus (strain ATCC BAA-309 / NBRC 16581 / SB1003) GN=cycA PE=1 SV=1	CYC2_RHOCB	14 280,0	1	5	7	15	0.000813	0.321	TCHSIIAPDGTEIVK	K	G	0.78	1.97	0.366	1 640,8315
EC_212270_T33Vspike_10_A	Cytochrome c2 OS=Rhodobacter capsulatus (strain ATCC BAA-309 / NBRC 16581 / SB1003) GN=cycA PE=1 SV=1	CYC2_RHOCB	14 280,0	1	5	7	15	0.000813	0.321	TCHSIIAPDGTEIVKGAK	K	T	0.997	3.6	0.378	1 896,9851
EC_212270_T33Vspike_10_B	Cytochrome c2 OS=Rhodobacter capsulatus (strain ATCC BAA-309 / NBRC 16581 / SB1003) GN=cycA PE=1 SV=1	CYC2_RHOCB	14 280,0	1	6	7	16	0.000848	0.533	DPGAFLK	K	E	0.845	2.58	0.198	747.404
EC_212270_T33Vspike_10_B	Cytochrome c2 OS=Rhodobacter capsulatus (strain ATCC BAA-309 / NBRC 16581 / SB1003) GN=cycA PE=1 SV=1	CYC2_RHOCB	14 280,0	1	6	7	16	0.000848	0.533	GGEDVAAYLASVVK	K	-	0.997	4.68	0.554	1 378,7213
EC_212270_T33Vspike_10_B	Cytochrome c2 OS=Rhodobacter capsulatus (strain ATCC BAA-309 / NBRC 16581 / SB1003) GN=cycA PE=1 SV=1	CYC2_RHOCB	14 280,0	1	6	7	16	0.000848	0.533	LAKGGEDVAAYLASVVK	K	-	0.997	4.21	0.342	1 690,9375
EC_212270_T33Vspike_10_B	Cytochrome c2 OS=Rhodobacter capsulatus (strain ATCC BAA-309 / NBRC 16581 / SB1003) GN=cycA PE=1 SV=1	CYC2_RHOCB	14 280,0	1	6	7	16	0.000848	0.533	TAGTYPEFK	R	Y	0.875	2.5	0.34	1 013,4939
EC_212270_T33Vspike_10_B	Cytochrome c2 OS=Rhodobacter capsulatus (strain ATCC BAA-309 / NBRC 16581 / SB1003) GN=cycA PE=1 SV=1	CYC2_RHOCB	14 280,0	1	6	7	16	0.000848	0.533	TCHSIIAPDGTEIVK	K	G	0.997	3.23	0.486	1 640,8315
EC_212270_T33Vspike_10_B	Cytochrome c2 OS=Rhodobacter capsulatus (strain ATCC BAA-309 / NBRC 16581 / SB1003) GN=cycA PE=1 SV=1	CYC2_RHOCB	14 280,0	1	6	7	16	0.000848	0.533	YKDSIVALGASGFAWTEEDIATYVK	K	D	0.997	4.16	0.434	2 734,3612
EC_212270_T33Vspike_11_A	Cytochrome c2 OS=Rhodobacter capsulatus (strain ATCC BAA-309 / NBRC 16581 / SB1003) GN=cycA PE=1 SV=1	CYC2_RHOCB	14 280,0	1	2	3	4	0.000185	0.124	GGEDVAAYLASVVK	K	-	0.997	5.3	0.542	1 378,7213
EC_212270_T33Vspike_11_A	Cytochrome c2 OS=Rhodobacter capsulatus (strain ATCC BAA-309 / NBRC 16581 / SB1003) GN=cycA PE=1 SV=1	CYC2_RHOCB	14 280,0	1	2	3	4	0.000185	0.124	LAKGGEDVAAYLASVVK	K	-	0.997	3.56	0.401	1 690,9375
EC_212270_T33Vspike_11_B	Cytochrome c2 OS=Rhodobacter capsulatus (strain ATCC BAA-309 / NBRC 16581 / SB1003) GN=cycA PE=1 SV=1	CYC2_RHOCB	14 280,0	1	2	4	4	0.000186	0.124	GGEDVAAYLASVVK	K	-	0.997	5.42	0.564	1 378,7213
EC_212270_T33Vspike_11_B	Cytochrome c2 OS=Rhodobacter capsulatus (strain ATCC BAA-309 / NBRC 16581 / SB1003) GN=cycA PE=1 SV=1	CYC2_RHOCB	14 280,0	1	2	4	4	0.000186	0.124	LAKGGEDVAAYLASVVK	K	-	0.997	4.63	0.386	1 690,9375
EC_212270_T33Vspike_12_A	Cytochrome c2 OS=Rhodobacter capsulatus (strain ATCC BAA-309 / NBRC 16581 / SB1003) GN=cycA PE=1 SV=1	CYC2_RHOCB	14 280,0	1	6	8	15	0.00075	0.533	DPGAFLK	K	E	0.473	2.7	0.205	747.404
EC_212270_T33Vspike_12_A	Cytochrome c2 OS=Rhodobacter capsulatus (strain ATCC BAA-309 / NBRC 16581 / SB1003) GN=cycA PE=1 SV=1	CYC2_RHOCB	14 280,0	1	6	8	15	0.00075	0.533	GGEDVAAYLASVVK	K	-	0.997	5.26	0.532	1 378,7213
EC_212270_T33Vspike_12_A	Cytochrome c2 OS=Rhodobacter capsulatus (strain ATCC BAA-309 / NBRC 16581 / SB1003) GN=cycA PE=1 SV=1	CYC2_RHOCB	14 280,0	1	6	8	15	0.00075	0.533	LAKGGEDVAAYLASVVK	K	-	0.997	4.43	0.297	1 690,9375
EC_212270_T33Vspike_12_A	Cytochrome c2 OS=Rhodobacter capsulatus (strain ATCC BAA-309 / NBRC 16581 / SB1003) GN=cycA PE=1 SV=1	CYC2_RHOCB	14 280,0	1	6	8	15	0.00075	0.533	TAGTYPEFK	R	Y	0.583	2.21	0.0644	1 013,4939
EC_212270_T33Vspike_12_A	Cytochrome c2 OS=Rhodobacter capsulatus (strain ATCC BAA-309 / NBRC 16581 / SB1003) GN=cycA PE=1 SV=1	CYC2_RHOCB	14 280,0	1	6	8	15	0.00075	0.533	TCHSIIAPDGTEIVK	K	G	0.331	2.79	0.483	1 640,8315
EC_212270_T33Vspike_12_A	Cytochrome c2 OS=Rhodobacter capsulatus (strain ATCC BAA-309 / NBRC 16581 / SB1003) GN=cycA PE=1 SV=1	CYC2_RHOCB	14 280,0	1	6	8	15	0.00075	0.533	YKDSIVALGASGFAWTEEDIATYVK	K	D	0.997	4.74	0.49	2 734,3612
EC_212270_T33Vspike_12_B	Cytochrome c2 OS=Rhodobacter capsulatus (strain ATCC BAA-309 / NBRC 16581 / SB1003) GN=cycA PE=1 SV=1	CYC2_RHOCB	14 280,0	1	7	9	21	0.00112	0.577	DPGAFLK	K	E	0.802	2.29	0.198	747.404
EC_212270_T33Vspike_12_B	Cytochrome c2 OS=Rhodobacter capsulatus (strain ATCC BAA-309 / NBRC 16581 / SB1003) GN=cycA PE=1 SV=1	CYC2_RHOCB	14 280,0	1	7	9	21	0.00112	0.577	GGEDVAAYLASVVK	K	-	0.997	5.45	0.55	1 378,7213
EC_212270_T33Vspike_12_B	Cytochrome c2 OS=Rhodobacter capsulatus (strain ATCC BAA-309 / NBRC 16581 / SB1003) GN=cycA PE=1 SV=1	CYC2_RHOCB	14 280,0	1	7	9	21	0.00112	0.577	LAKGGEDVAAYLASVVK	K	-	0.997	3.97	0.584	1 690,9375
EC_212270_T33Vspike_12_B	Cytochrome c2 OS=Rhodobacter capsulatus (strain ATCC BAA-309 / NBRC 16581 / SB1003) GN=cycA PE=1 SV=1	CYC2_RHOCB	14 280,0	1	7	9	21	0.00112	0.577	TAGTYPEFK	R	Y	0.901	2.43	0.495	1 013,4939
EC_212270_T33Vspike_12_B	Cytochrome c2 OS=Rhodobacter capsulatus (strain ATCC BAA-309 / NBRC 16581 / SB1003) GN=cycA PE=1 SV=1	CYC2_RHOCB	14 280,0	1	7	9	21	0.00112	0.577	TCHSIIAPDGTEIVK	K	G	0.323	2.08	0.14	1 640,8315
EC_212270_T33Vspike_12_B	Cytochrome c2 OS=Rhodobacter capsulatus (strain ATCC BAA-309 / NBRC 16581 / SB1003) GN=cycA PE=1 SV=1	CYC2_RHOCB	14 280,0	1	7	9	21	0.00112	0.577	TGMAFKLAK	K	G	0.607	1.96	0.297	966.544
EC_212270_T33Vspike_12_B	Cytochrome c2 OS=Rhodobacter capsulatus (strain ATCC BAA-309 / NBRC 16581 / SB1003) GN=cycA PE=1 SV=1	CYC2_RHOCB	14 280,0	1	7	9	21	0.00112	0.577	YKDSIVALGASGFAWTEEDIATYVK	K	D	0.997	4.73	0.534	2 734,3612
EC_212270_T33Vspike_2_B	Cold shock domain-containing protein E1 (Fragment) OS=Cavia porcellus GN=CSDE1 PE=3 SV=1	CSDE1_CAVPO,CSDE1_HUMAN,CSDE1_MOUSE,CSDE1_RAT	12 673,5	0.999	2	2	2	8.71e-05	0.219	GPDNSMGFGAER	R	K	0.974	2.7	0.522	1 237,5267
EC_212270_T33Vspike_2_B	Cold shock domain-containing protein E1 (Fragment) OS=Cavia porcellus GN=CSDE1 PE=3 SV=1	CSDE1_CAVPO,CSDE1_HUMAN,CSDE1_MOUSE,CSDE1_RAT	12 673,5	0.999	2	2	2	8.71e-05	0.219	LKNITLDDASAPR	R	L	0.949	2.5	0.377	1 413,7698
EC_212270_T33Vspike_5_A	Cold shock domain-containing protein E1 (Fragment) OS=Cavia porcellus GN=CSDE1 PE=3 SV=1	CSDE1_CAVPO,CSDE1_HUMAN,CSDE1_MOUSE,CSDE1_RAT	12 673,5	1	2	2	2	8.45e-05	0.219	GPDNSMGFGAER	R	K	0.955	2.56	0.484	1 237,5267
EC_212270_T33Vspike_5_A	Cold shock domain-containing protein E1 (Fragment) OS=Cavia porcellus GN=CSDE1 PE=3 SV=1	CSDE1_CAVPO,CSDE1_HUMAN,CSDE1_MOUSE,CSDE1_RAT	12 673,5	1	2	2	2	8.45e-05	0.219	LKNITLDDASAPR	R	L	0.994	3.03	0.394	1 413,7698
EC_212270_T33Vspike_11_B	Cleavage stimulation factor subunit 2 OS=Bos taurus GN=CSTF2 PE=2 SV=1	CSTF2_BOVIN,CSTF2_HUMAN,CSTF2_PONAB	60 437,5	1	2	2	2	9.31e-05	0.0804	GLLGDAPNDPRGGTLLSVTGEVEPR	R	G	0.997	3.27	0.434	2 520,3057
EC_212270_T33Vspike_11_B	Cleavage stimulation factor subunit 2 OS=Bos taurus GN=CSTF2 PE=2 SV=1	CSTF2_BOVIN,CSTF2_HUMAN,CSTF2_PONAB	60 437,5	1	2	2	2	9.31e-05	0.0804	NMLLQNPQLAYALLQAQVVMR	R	I	0.997	3.12	0.392	2 414,3048
EC_212270_T33Vspike_10_B	Cleavage stimulation factor subunit 2 OS=Bos taurus GN=CSTF2 PE=2 SV=1	CSTF2_BOVIN,CSTF2_HUMAN,CSTF2_PONAB,CSTFT_HUMAN,CSTFT_MOUSE	60 437,5	1	2	2	2	0.000106	0.0804	GLLGDAPNDPRGGTLLSVTGEVEPR	R	G	0.977	2.96	0.305	2 520,3057
EC_212270_T33Vspike_10_B	Cleavage stimulation factor subunit 2 OS=Bos taurus GN=CSTF2 PE=2 SV=1	CSTF2_BOVIN,CSTF2_HUMAN,CSTF2_PONAB,CSTFT_HUMAN,CSTFT_MOUSE	60 437,5	1	2	2	2	0.000106	0.0804	NMLLQNPQLAYALLQAQVVMR	R	I	0.997	2.93	0.361	2 414,3048
EC_212270_T33Vspike_1_A	Cleavage stimulation factor subunit 2 OS=Homo sapiens GN=CSTF2 PE=1 SV=1	CSTF2_HUMAN,CSTF2_PONAB	60 959,1	1	2	3	4	0.000172	0.0555	GSLPANVPTPR	R	G	0.884	1.98	0.234	1 108,6110
EC_212270_T33Vspike_1_A	Cleavage stimulation factor subunit 2 OS=Homo sapiens GN=CSTF2 PE=1 SV=1	CSTF2_HUMAN,CSTF2_PONAB	60 959,1	1	2	3	4	0.000172	0.0555	NMLLQNPQLAYALLQAQVVMR	R	I	0.997	5.48	0.634	2 414,3048
EC_212270_T33Vspike_2_A	Cleavage stimulation factor subunit 2 OS=Homo sapiens GN=CSTF2 PE=1 SV=1	CSTF2_HUMAN,CSTF2_PONAB	60 959,1	1	2	2	2	8.35e-05	0.0624	GLLGDAPNDPRGGTLLSVTGEVEPR	R	G	0.997	3.36	0.429	2 520,3057
EC_212270_T33Vspike_2_A	Cleavage stimulation factor subunit 2 OS=Homo sapiens GN=CSTF2 PE=1 SV=1	CSTF2_HUMAN,CSTF2_PONAB	60 959,1	1	2	2	2	8.35e-05	0.0624	LCVQNSPQEAR	K	N	0.973	2.45	0.344	1 301,6267
EC_212270_T33Vspike_2_B	Cleavage stimulation factor subunit 2 OS=Homo sapiens GN=CSTF2 PE=1 SV=1	CSTF2_HUMAN,CSTF2_PONAB	60 959,1	0.999	2	2	2	8.71e-05	0.0624	GLLGDAPNDPRGGTLLSVTGEVEPR	R	G	0.997	3.63	0.346	2 520,3057
EC_212270_T33Vspike_2_B	Cleavage stimulation factor subunit 2 OS=Homo sapiens GN=CSTF2 PE=1 SV=1	CSTF2_HUMAN,CSTF2_PONAB	60 959,1	0.999	2	2	2	8.71e-05	0.0624	GSLPANVPTPR	R	G	0.748	1.69	0.287	1 108,6110
EC_212270_T33Vspike_3_A	Cleavage stimulation factor subunit 2 OS=Homo sapiens GN=CSTF2 PE=1 SV=1	CSTF2_HUMAN,CSTF2_PONAB	60 959,1	0.998	2	3	4	0.000201	0.0797	GLLGDAPNDPRGGTLLSVTGEVEPR	R	G	0.244	2.83	0.23	2 520,3057
EC_212270_T33Vspike_3_A	Cleavage stimulation factor subunit 2 OS=Homo sapiens GN=CSTF2 PE=1 SV=1	CSTF2_HUMAN,CSTF2_PONAB	60 959,1	0.998	2	3	4	0.000201	0.0797	NMLLQNPQLAYALLQAQVVMR	R	I	0.997	4.29	0.569	2 414,3048
EC_212270_T33Vspike_3_B	Cleavage stimulation factor subunit 2 OS=Homo sapiens GN=CSTF2 PE=1 SV=1	CSTF2_HUMAN,CSTF2_PONAB	60 959,1	0.998	3	4	5	0.000262	0.0711	GSLPANVPTPR	R	G	0.316	1.55	0.251	1 108,6110
EC_212270_T33Vspike_3_B	Cleavage stimulation factor subunit 2 OS=Homo sapiens GN=CSTF2 PE=1 SV=1	CSTF2_HUMAN,CSTF2_PONAB	60 959,1	0.998	3	4	5	0.000262	0.0711	IVDPEIALK	R	I	0.101	1.44	-0.00352	997.593
EC_212270_T33Vspike_3_B	Cleavage stimulation factor subunit 2 OS=Homo sapiens GN=CSTF2 PE=1 SV=1	CSTF2_HUMAN,CSTF2_PONAB	60 959,1	0.998	3	4	5	0.000262	0.0711	NMLLQNPQLAYALLQAQVVMR	R	I	0.997	3.86	0.496	2 414,3048
EC_212270_T33Vspike_4_B	Cleavage stimulation factor subunit 2 OS=Homo sapiens GN=CSTF2 PE=1 SV=1	CSTF2_HUMAN,CSTF2_PONAB	60 959,1	0.986	0	0	2	7.93e-05	0.0797	GLLGDAPNDPRGGTLLSVTGEVEPR	R	G	0.997	3.53	0.461	2 520,3057
EC_212270_T33Vspike_4_B	Cleavage stimulation factor subunit 2 OS=Homo sapiens GN=CSTF2 PE=1 SV=1	CSTF2_HUMAN,CSTF2_PONAB	60 959,1	0.986	0	0	2	7.93e-05	0.0797	NMLLQNPQLAYALLQAQVVMR	R	I	0.997	3.8	0.389	2 414,3048
EC_212270_T33Vspike_5_A	Cleavage stimulation factor subunit 2 OS=Homo sapiens GN=CSTF2 PE=1 SV=1	CSTF2_HUMAN,CSTF2_PONAB	60 959,1	1	3	3	5	0.000211	0.0988	GLLGDAPNDPRGGTLLSVTGEVEPR	R	G	0.997	3.49	0.427	2 520,3057
EC_212270_T33Vspike_5_A	Cleavage stimulation factor subunit 2 OS=Homo sapiens GN=CSTF2 PE=1 SV=1	CSTF2_HUMAN,CSTF2_PONAB	60 959,1	1	3	3	5	0.000211	0.0988	GSLPANVPTPR	R	G	0.982	3.12	0.358	1 108,6110
EC_212270_T33Vspike_5_A	Cleavage stimulation factor subunit 2 OS=Homo sapiens GN=CSTF2 PE=1 SV=1	CSTF2_HUMAN,CSTF2_PONAB	60 959,1	1	3	3	5	0.000211	0.0988	NMLLQNPQLAYALLQAQVVMR	R	I	0.997	3.29	0.313	2 414,3048
EC_212270_T33Vspike_5_B	Cleavage stimulation factor subunit 2 OS=Homo sapiens GN=CSTF2 PE=1 SV=1	CSTF2_HUMAN,CSTF2_PONAB	60 959,1	1	3	3	3	0.000153	0.0815	GLLGDAPNDPRGGTLLSVTGEVEPR	R	G	0.991	3.2	0.362	2 520,3057
EC_212270_T33Vspike_5_B	Cleavage stimulation factor subunit 2 OS=Homo sapiens GN=CSTF2 PE=1 SV=1	CSTF2_HUMAN,CSTF2_PONAB	60 959,1	1	3	3	3	0.000153	0.0815	GSLPANVPTPR	R	G	0.917	2.12	0.353	1 108,6110
EC_212270_T33Vspike_5_B	Cleavage stimulation factor subunit 2 OS=Homo sapiens GN=CSTF2 PE=1 SV=1	CSTF2_HUMAN,CSTF2_PONAB	60 959,1	1	3	3	3	0.000153	0.0815	LCVQNSPQEAR	K	N	0.914	2.05	0.31	1 301,6267
EC_212270_T33Vspike_6_A	Cleavage stimulation factor subunit 2 OS=Homo sapiens GN=CSTF2 PE=1 SV=1	CSTF2_HUMAN,CSTF2_PONAB	60 959,1	1	2	2	2	0.000111	0.0797	GLLGDAPNDPRGGTLLSVTGEVEPR	R	G	0.997	3.45	0.419	2 520,3057
EC_212270_T33Vspike_6_A	Cleavage stimulation factor subunit 2 OS=Homo sapiens GN=CSTF2 PE=1 SV=1	CSTF2_HUMAN,CSTF2_PONAB	60 959,1	1	2	2	2	0.000111	0.0797	NMLLQNPQLAYALLQAQVVMR	R	I	0.936	2.77	0.303	2 414,3048
EC_212270_T33Vspike_7_A	Cleavage stimulation factor subunit 2 OS=Homo sapiens GN=CSTF2 PE=1 SV=1	CSTF2_HUMAN,CSTF2_PONAB	60 959,1	0.999	1	1	4	0.000181	0.0988	GLLGDAPNDPRGGTLLSVTGEVEPR	R	G	0.997	3.46	0.367	2 520,3057
EC_212270_T33Vspike_7_A	Cleavage stimulation factor subunit 2 OS=Homo sapiens GN=CSTF2 PE=1 SV=1	CSTF2_HUMAN,CSTF2_PONAB	60 959,1	0.999	1	1	4	0.000181	0.0988	GSLPANVPTPR	R	G	0.966	2.85	0.339	1 108,6110
EC_212270_T33Vspike_7_A	Cleavage stimulation factor subunit 2 OS=Homo sapiens GN=CSTF2 PE=1 SV=1	CSTF2_HUMAN,CSTF2_PONAB	60 959,1	0.999	1	1	4	0.000181	0.0988	NMLLQNPQLAYALLQAQVVMR	R	I	0.959	2.61	0.168	2 414,3048
EC_212270_T33Vspike_7_B	Cleavage stimulation factor subunit 2 OS=Homo sapiens GN=CSTF2 PE=1 SV=1	CSTF2_HUMAN,CSTF2_PONAB	60 959,1	0.988	1	1	2	9.09e-05	0.0624	GLLGDAPNDPRGGTLLSVTGEVEPR	R	G	0.997	3.76	0.527	2 520,3057
EC_212270_T33Vspike_7_B	Cleavage stimulation factor subunit 2 OS=Homo sapiens GN=CSTF2 PE=1 SV=1	CSTF2_HUMAN,CSTF2_PONAB	60 959,1	0.988	1	1	2	9.09e-05	0.0624	GSLPANVPTPR	R	G	0.934	2.11	0.352	1 108,6110
EC_212270_T33Vspike_8_A	Cleavage stimulation factor subunit 2 OS=Homo sapiens GN=CSTF2 PE=1 SV=1	CSTF2_HUMAN,CSTF2_PONAB	60 959,1	1	2	2	2	9.39e-05	0.0797	GLLGDAPNDPRGGTLLSVTGEVEPR	R	G	0.997	4.28	0.445	2 520,3057
EC_212270_T33Vspike_8_A	Cleavage stimulation factor subunit 2 OS=Homo sapiens GN=CSTF2 PE=1 SV=1	CSTF2_HUMAN,CSTF2_PONAB	60 959,1	1	2	2	2	9.39e-05	0.0797	NMLLQNPQLAYALLQAQVVMR	R	I	0.911	2.92	0.0626	2 414,3048
EC_212270_T33Vspike_8_B	Cleavage stimulation factor subunit 2 OS=Homo sapiens GN=CSTF2 PE=1 SV=1	CSTF2_HUMAN,CSTF2_PONAB	60 959,1	1	2	2	2	9.59e-05	0.0797	GLLGDAPNDPRGGTLLSVTGEVEPR	R	G	0.997	3.68	0.426	2 520,3057
EC_212270_T33Vspike_8_B	Cleavage stimulation factor subunit 2 OS=Homo sapiens GN=CSTF2 PE=1 SV=1	CSTF2_HUMAN,CSTF2_PONAB	60 959,1	1	2	2	2	9.59e-05	0.0797	NMLLQNPQLAYALLQAQVVMR	R	I	0.903	2.94	0.226	2 414,3048
EC_212270_T33Vspike_9_A	Cleavage stimulation factor subunit 2 OS=Homo sapiens GN=CSTF2 PE=1 SV=1	CSTF2_HUMAN,CSTF2_PONAB	60 959,1	1	3	3	3	0.000145	0.0988	GLLGDAPNDPRGGTLLSVTGEVEPR	R	G	0.997	3.95	0.582	2 520,3057
EC_212270_T33Vspike_9_A	Cleavage stimulation factor subunit 2 OS=Homo sapiens GN=CSTF2 PE=1 SV=1	CSTF2_HUMAN,CSTF2_PONAB	60 959,1	1	3	3	3	0.000145	0.0988	GSLPANVPTPR	R	G	0.945	2.34	0.307	1 108,6110
EC_212270_T33Vspike_9_A	Cleavage stimulation factor subunit 2 OS=Homo sapiens GN=CSTF2 PE=1 SV=1	CSTF2_HUMAN,CSTF2_PONAB	60 959,1	1	3	3	3	0.000145	0.0988	NMLLQNPQLAYALLQAQVVMR	R	I	0.997	3.7	0.42	2 414,3048
EC_212270_T33Vspike_9_B	Cleavage stimulation factor subunit 2 OS=Homo sapiens GN=CSTF2 PE=1 SV=1	CSTF2_HUMAN,CSTF2_PONAB	60 959,1	1	2	2	3	0.000155	0.0797	GLLGDAPNDPRGGTLLSVTGEVEPR	R	G	0.997	3.46	0.403	2 520,3057
EC_212270_T33Vspike_9_B	Cleavage stimulation factor subunit 2 OS=Homo sapiens GN=CSTF2 PE=1 SV=1	CSTF2_HUMAN,CSTF2_PONAB	60 959,1	1	2	2	3	0.000155	0.0797	NMLLQNPQLAYALLQAQVVMR	R	I	0.966	2.61	0.299	2 414,3048
EC_212270_T33Vspike_12_A	Cleavage stimulation factor subunit 2 OS=Homo sapiens GN=CSTF2 PE=1 SV=1	CSTF2_HUMAN,CSTF2_PONAB	60 959,1	0.999	3	3	4	0.0002	0.0953	GLLGDAPNDPRGGTLLSVTGEVEPR	R	G	0.405	2.79	0.318	2 520,3057
EC_212270_T33Vspike_12_A	Cleavage stimulation factor subunit 2 OS=Homo sapiens GN=CSTF2 PE=1 SV=1	CSTF2_HUMAN,CSTF2_PONAB	60 959,1	0.999	3	3	4	0.0002	0.0953	IVDPEIALK	R	I	0.461	1.59	0.0646	997.593
EC_212270_T33Vspike_12_A	Cleavage stimulation factor subunit 2 OS=Homo sapiens GN=CSTF2 PE=1 SV=1	CSTF2_HUMAN,CSTF2_PONAB	60 959,1	0.999	3	3	4	0.0002	0.0953	NMLLQNPQLAYALLQAQVVMR	R	I	0.997	3.66	0.403	2 414,3048
EC_212270_T33Vspike_12_B	Cleavage stimulation factor subunit 2 OS=Homo sapiens GN=CSTF2 PE=1 SV=1	CSTF2_HUMAN,CSTF2_PONAB	60 959,1	1	3	3	4	0.000214	0.0953	GLLGDAPNDPRGGTLLSVTGEVEPR	R	G	0.743	2.37	0.176	2 520,3057
EC_212270_T33Vspike_12_B	Cleavage stimulation factor subunit 2 OS=Homo sapiens GN=CSTF2 PE=1 SV=1	CSTF2_HUMAN,CSTF2_PONAB	60 959,1	1	3	3	4	0.000214	0.0953	IVDPEIALK	R	I	0.48	1.45	0.249	997.593
EC_212270_T33Vspike_12_B	Cleavage stimulation factor subunit 2 OS=Homo sapiens GN=CSTF2 PE=1 SV=1	CSTF2_HUMAN,CSTF2_PONAB	60 959,1	1	3	3	4	0.000214	0.0953	NMLLQNPQLAYALLQAQVVMR	R	I	0.997	3.41	0.374	2 414,3048
EC_212270_T33Vspike_2_A	Drebrin-like protein OS=Homo sapiens GN=DBNL PE=1 SV=1	DBNL_HUMAN	48 206,3	1	3	3	4	0.000167	0.0907	FQDVGPQAPVGSVYQK	R	T	0.997	2.85	0.368	1 719,8702
EC_212270_T33Vspike_2_A	Drebrin-like protein OS=Homo sapiens GN=DBNL PE=1 SV=1	DBNL_HUMAN	48 206,3	1	3	3	4	0.000167	0.0907	TWEQQQEVVSR	R	N	0.997	3.05	0.382	1 389,6757
EC_212270_T33Vspike_2_A	Drebrin-like protein OS=Homo sapiens GN=DBNL PE=1 SV=1	DBNL_HUMAN	48 206,3	1	3	3	4	0.000167	0.0907	YQEQGGEASPQRTWEQQQEVVSR	R	N	0.972	3.26	0.375	2 720,2660
EC_212270_T33Vspike_2_B	Drebrin-like protein OS=Homo sapiens GN=DBNL PE=1 SV=1	DBNL_HUMAN	48 206,3	1	3	3	4	0.000174	0.0907	FQDVGPQAPVGSVYQK	R	T	0.997	3.35	0.439	1 719,8702
EC_212270_T33Vspike_2_B	Drebrin-like protein OS=Homo sapiens GN=DBNL PE=1 SV=1	DBNL_HUMAN	48 206,3	1	3	3	4	0.000174	0.0907	TWEQQQEVVSR	R	N	0.99	2.87	0.351	1 389,6757
EC_212270_T33Vspike_2_B	Drebrin-like protein OS=Homo sapiens GN=DBNL PE=1 SV=1	DBNL_HUMAN	48 206,3	1	3	3	4	0.000174	0.0907	YQEQGGEASPQRTWEQQQEVVSR	R	N	0.92	2.43	0.298	2 720,2660
EC_212270_T33Vspike_7_A	Drebrin-like protein OS=Homo sapiens GN=DBNL PE=1 SV=1	DBNL_HUMAN	48 206,3	0.994	2	2	2	9.04e-05	0.0535	TWEQQQEVVSR	R	N	0.948	2.57	0.318	1 389,6757
EC_212270_T33Vspike_7_A	Drebrin-like protein OS=Homo sapiens GN=DBNL PE=1 SV=1	DBNL_HUMAN	48 206,3	0.994	2	2	2	9.04e-05	0.0535	YQEQGGEASPQRTWEQQQEVVSR	R	N	0.893	2.37	0.249	2 720,2660
EC_212270_T33Vspike_7_B	Drebrin-like protein OS=Homo sapiens GN=DBNL PE=1 SV=1	DBNL_HUMAN	48 206,3	0.991	2	2	3	0.000136	0.0535	NRNEQESAVHPR	R	E	0.797	2.09	0.252	1 436,6988
EC_212270_T33Vspike_7_B	Drebrin-like protein OS=Homo sapiens GN=DBNL PE=1 SV=1	DBNL_HUMAN	48 206,3	0.991	2	2	3	0.000136	0.0535	TWEQQQEVVSR	R	N	0.954	2.35	0.32	1 389,6757
EC_212270_T33Vspike_8_B	Drebrin-like protein OS=Homo sapiens GN=DBNL PE=1 SV=1	DBNL_HUMAN	48 206,3	1	2	2	2	9.59e-05	0.0535	NRNEQESAVHPR	R	E	0.997	2.53	0.271	1 436,6988
EC_212270_T33Vspike_8_B	Drebrin-like protein OS=Homo sapiens GN=DBNL PE=1 SV=1	DBNL_HUMAN	48 206,3	1	2	2	2	9.59e-05	0.0535	TWEQQQEVVSR	R	N	0.986	2.35	0.392	1 389,6757
EC_212270_T33Vspike_2_A	Dynactin subunit 2 OS=Homo sapiens GN=DCTN2 PE=1 SV=4	DCTN2_HUMAN	44 231,7	1	4	4	4	0.000167	0.172	LQSVLGKVNEIAK	R	H	0.923	2.68	0.257	1 398,8316
EC_212270_T33Vspike_2_A	Dynactin subunit 2 OS=Homo sapiens GN=DCTN2 PE=1 SV=4	DCTN2_HUMAN	44 231,7	1	4	4	4	0.000167	0.172	TGYESGEYEMLGEGLGVKETPQQKYQR	R	L	0.834	2.49	0.202	3 077,4524
EC_212270_T33Vspike_2_A	Dynactin subunit 2 OS=Homo sapiens GN=DCTN2 PE=1 SV=4	DCTN2_HUMAN	44 231,7	1	4	4	4	0.000167	0.172	VSALDLAVLDQVEAR	K	L	0.997	4.65	0.428	1 598,8749
EC_212270_T33Vspike_2_A	Dynactin subunit 2 OS=Homo sapiens GN=DCTN2 PE=1 SV=4	DCTN2_HUMAN	44 231,7	1	4	4	4	0.000167	0.172	WSPIASTLPELVQR	R	L	0.994	3.5	0.336	1 596,8745
EC_212270_T33Vspike_2_B	Dynactin subunit 2 OS=Homo sapiens GN=DCTN2 PE=1 SV=4	DCTN2_HUMAN	44 231,7	1	3	3	4	0.000174	0.14	TGYESGEYEMLGEGLGVKETPQQKYQR	R	L	0.98	3.17	0.319	3 077,4524
EC_212270_T33Vspike_2_B	Dynactin subunit 2 OS=Homo sapiens GN=DCTN2 PE=1 SV=4	DCTN2_HUMAN	44 231,7	1	3	3	4	0.000174	0.14	VSALDLAVLDQVEAR	K	L	0.997	4.34	0.451	1 598,8749
EC_212270_T33Vspike_2_B	Dynactin subunit 2 OS=Homo sapiens GN=DCTN2 PE=1 SV=4	DCTN2_HUMAN	44 231,7	1	3	3	4	0.000174	0.14	WSPIASTLPELVQR	R	L	0.969	2.88	0.285	1 596,8745
EC_212270_T33Vspike_7_B	Dynactin subunit 2 OS=Homo sapiens GN=DCTN2 PE=1 SV=4	DCTN2_HUMAN	44 231,7	0.995	2	2	2	9.09e-05	0.102	TGYESGEYEMLGEGLGVKETPQQKYQR	R	L	0.923	3.2	0.174	3 077,4524
EC_212270_T33Vspike_7_B	Dynactin subunit 2 OS=Homo sapiens GN=DCTN2 PE=1 SV=4	DCTN2_HUMAN	44 231,7	0.995	2	2	2	9.09e-05	0.102	WSPIASTLPELVQR	R	L	0.934	2.59	0.277	1 596,8745
EC_212270_T33Vspike_9_B	Dynactin subunit 2 OS=Homo sapiens GN=DCTN2 PE=1 SV=4	DCTN2_HUMAN	44 231,7	1	2	2	2	0.000103	0.0773	LLHEVQELTTEVEKIK	R	T	0.96	2.62	0.347	1 909,0643
EC_212270_T33Vspike_9_B	Dynactin subunit 2 OS=Homo sapiens GN=DCTN2 PE=1 SV=4	DCTN2_HUMAN	44 231,7	1	2	2	2	0.000103	0.0773	VSALDLAVLDQVEAR	K	L	0.997	3.6	0.349	1 598,8749
EC_212270_T33Vspike_1_A	dCTP pyrophosphatase 1 OS=Homo sapiens GN=DCTPP1 PE=1 SV=1	DCTP1_HUMAN	18 681,2	0.998	2	2	3	0.000129	0.176	CRVDLPLAVLSK	R	M	0.879	3.01	0.0933	1 370,7826
EC_212270_T33Vspike_1_A	dCTP pyrophosphatase 1 OS=Homo sapiens GN=DCTPP1 PE=1 SV=1	DCTP1_HUMAN	18 681,2	0.998	2	2	3	0.000129	0.176	LHAEFAAERDWEQFHQPR	R	N	0.968	2.88	0.4	2 267,0741
EC_212270_T33Vspike_3_A	dCTP pyrophosphatase 1 OS=Homo sapiens GN=DCTPP1 PE=1 SV=1	DCTP1_HUMAN	18 681,2	0.997	2	3	3	0.000151	0.288	KYTELPHGAISEDQAVGPADIPCDSTGQTST	R	-	0.911	2.93	0.269	3 245,4908
EC_212270_T33Vspike_3_A	dCTP pyrophosphatase 1 OS=Homo sapiens GN=DCTPP1 PE=1 SV=1	DCTP1_HUMAN	18 681,2	0.997	2	3	3	0.000151	0.288	LHAEFAAERDWEQFHQPR	R	N	0.968	3.12	0.378	2 267,0741
EC_212270_T33Vspike_7_B	dCTP pyrophosphatase 1 OS=Homo sapiens GN=DCTPP1 PE=1 SV=1	DCTP1_HUMAN	18 681,2	1	2	2	2	9.09e-05	0.288	KYTELPHGAISEDQAVGPADIPCDSTGQTST	R	-	0.918	2.88	0.252	3 188,4693
EC_212270_T33Vspike_7_B	dCTP pyrophosphatase 1 OS=Homo sapiens GN=DCTPP1 PE=1 SV=1	DCTP1_HUMAN	18 681,2	1	2	2	2	9.09e-05	0.288	LHAEFAAERDWEQFHQPR	R	N	0.997	3.58	0.534	2 267,0741
EC_212270_T33Vspike_8_A	dCTP pyrophosphatase 1 OS=Homo sapiens GN=DCTPP1 PE=1 SV=1	DCTP1_HUMAN	18 681,2	0.998	2	2	2	9.39e-05	0.288	KYTELPHGAISEDQAVGPADIPCDSTGQTST	R	-	0.893	2.25	0.319	3 245,4908
EC_212270_T33Vspike_8_A	dCTP pyrophosphatase 1 OS=Homo sapiens GN=DCTPP1 PE=1 SV=1	DCTP1_HUMAN	18 681,2	0.998	2	2	2	9.39e-05	0.288	LHAEFAAERDWEQFHQPR	R	N	0.98	3.17	0.433	2 267,0741
EC_212270_T33Vspike_2_A	Probable ATP-dependent RNA helicase DDX17 OS=Homo sapiens GN=DDX17 PE=1 SV=2	DDX17_HUMAN,DDX17_MOUSE	72 401,0	1	3	3	4	0.000167	0.059	LMQLVDHRGGGGGGGGR	K	S	0.812	2.39	0.255	1 623,8136
EC_212270_T33Vspike_2_A	Probable ATP-dependent RNA helicase DDX17 OS=Homo sapiens GN=DDX17 PE=1 SV=2	DDX17_HUMAN,DDX17_MOUSE	72 401,0	1	3	3	4	0.000167	0.059	SSQSSSQQFSGIGR	R	S	0.997	3.49	0.351	1 455,6822
EC_212270_T33Vspike_2_A	Probable ATP-dependent RNA helicase DDX17 OS=Homo sapiens GN=DDX17 PE=1 SV=2	DDX17_HUMAN,DDX17_MOUSE	72 401,0	1	3	3	4	0.000167	0.059	VLEEANQAINPK	K	L	0.981	2.42	0.251	1 325,7060
EC_212270_T33Vspike_5_A	Probable ATP-dependent RNA helicase DDX17 OS=Homo sapiens GN=DDX17 PE=1 SV=2	DDX17_HUMAN,DDX17_MOUSE	72 401,0	1	2	2	3	0.000127	0.0412	ELIKVLEEANQAINPK	R	L	0.997	3.65	0.397	1 809,0118
EC_212270_T33Vspike_5_A	Probable ATP-dependent RNA helicase DDX17 OS=Homo sapiens GN=DDX17 PE=1 SV=2	DDX17_HUMAN,DDX17_MOUSE	72 401,0	1	2	2	3	0.000127	0.0412	SSQSSSQQFSGIGR	R	S	0.997	3.77	0.45	1 455,6822
EC_212270_T33Vspike_7_A	Probable ATP-dependent RNA helicase DDX17 OS=Homo sapiens GN=DDX17 PE=1 SV=2	DDX17_HUMAN,DDX17_MOUSE	72 401,0	1	2	2	3	0.000136	0.0412	ELIKVLEEANQAINPK	R	L	0.997	3.82	0.404	1 809,0118
EC_212270_T33Vspike_7_A	Probable ATP-dependent RNA helicase DDX17 OS=Homo sapiens GN=DDX17 PE=1 SV=2	DDX17_HUMAN,DDX17_MOUSE	72 401,0	1	2	2	3	0.000136	0.0412	SSQSSSQQFSGIGR	R	S	0.997	3.24	0.477	1 455,6822
[truncated: 10,768 more rows]

## Sheet: Identification_details
	Peak List Generator: unknown
		Version: unknown
		Charge States Calculated: unknown
		Deisotoped: unknown
[truncated: 28 more rows]
