# Supplementary material for: Analysis of networks of host proteins in the early time points following HIV transduction
Source: BMC Bioinformatics. 2019 Jul 17;20:398. doi: 10.1186/s12859-019-2990-3 (PMC6637640; doi:10.1186/s12859-019-2990-3)
Supplement: Supplementary file 2 — List of quantified proteins. The gene name according to UniProt in case of quantified proteins is given, and for each protein, the mean amount of four replicates is presented for each time point except NW, where the mean amount of 8 replicates is given. (XLSX 23 kb) [file 12859_2019_2990_MOESM2_ESM.xlsx]

## Sheet: Munka1
Protein code (gene name according to UniProt)	NW_mean	C04_mean	C12_mean	H04_mean	H12_mean
ACAT2	2.74076	0.530125	0.928575	1.72267	0.70645
ACTB	10.8041	8.08465	6.5597	12.7335	9.56733
AHCY	5.53501	2.90178	2.7922	4.77072	2.00047
AHNAK	0	0	0	0.49745	0
AHSG	8.62975	2.24305	0	1.74152	1.0657
AK2	2.23342	1.45392	3.42782	1.72525	2.27405
AKT1S1	0.264838	0	0	0.502575	0
ALDOA	6.16781	3.32552	1.71087	3.92185	0.70645
ALYREF	4.51695	3.47525	1.45515	4.00975	0
APEX1	0.901887	0	0	0	0
APOA2	1.70994	0	0	0	0
APRT	0	0	0	0.746175	0
ARHGDIA	0.397263	0	0.541675	0	0
ARL3	0	0	0.541675	1.00305	0
ARPP19	0.97295	0	0.696425	2.21093	0
ATP5B	3.86025	2.77117	1.2381	4.27837	2.93165
ATP5H	0.236737	0	0	0.753875	0
BANF1	0.44955	0	0	0	0
BCLAF1	0.634	0	0	0	0
BID	0.23435	0	0	0	0
BOLA2B	0.24975	0	0	0	0
BSG	0.236737	0	0	0	0
C11orf58	2.36091	0	0	0	0
C12orf43	0.23435	0	0	0	0
C1QBP	3.64431	4.0543	2.47565	3.9627	3.04825
C21orf33	3.08584	0.4619	0	0	0
CACYBP	0.838013	0	0	0	0
CALD1	0	0.4731	0	0	0
CALM2	1.09672	0	0	0	0
CAPRIN1	1.53094	1.17158	0	1.25133	0
CBX3	0.504625	0	0	0	0
CCDC124	2.23021	0.4619	2.16613	1.99795	0
CCDC58	0.720838	0	0	1.50455	0
CCDC86	3.5304	1.76995	1.2381	2.47142	0
CCT2	1.37777	3.01515	1.7094	4.77025	2.00047
CCT5	0.8531	3.50913	1.36265	3.69665	2.25438
CCT8	0.9891	0.4731	0	0.753875	0
CD2AP	0	0	0	0.753875	0
CD2BP2	2.2284	0.709675	0	2.25135	0
CDKN2A	0.267888	0	0	0	0
CFL1	0.8551	1.00323	0	0	0
CIRBP	0.397263	0	0	0	0
CKB	29.3316	18.7877	26.7685	23.7497	21.374
CKMT1B	4.0638	1.54818	1.60235	1.46475	0.70645
CLEC4E	0	0.4731	0	0	0
CLTA	1.72864	0	0	1.74877	0
CNBP	1.67287	0.4619	0	0	0
CNN3	0.499188	0.4731	0	2.02917	0
CNPY2	1.56163	2.21453	0.4492	2.02148	0
COA4	4.28292	0.946225	1.3702	1.45705	0
COX5A	4.2298	1.07508	2.14403	2.00712	0
COX5B	1.17645	0.54495	0	0	1.0657
COX6B1	4.71145	4.0202	2.91783	4.25485	11.2845
CTTN	1.26799	0	0	1.7109	0
CSDA	4.2281	1.76995	1.51943	7.25122	0
CSDE1	0.264838	0.4731	0	0	0
CSTF2	2.37409	2.52292	2.0727	2.50053	2.5154
DBNL	1.00315	0	0	1.78045	0
DCTN2	1.00315	0	0.541675	0.502575	0
DCTPP1	0.688688	0	0	0.9765	0
DDX17	0.473463	0.709675	0	1.50005	0
DPY30	1.43246	0	0	0	0
DRAP1	0.281612	0	0	0	0
DUT	1.62186	0.7952	0	1.24875	0
EDF1	1.25909	0	0	0	0
EEF1A1	3.61409	0.4731	2.0506	4.70585	0.507775
EEF1B2	1.18298	2.24103	1.50893	3.01892	2.00047
EEF1D	5.09541	1.07508	1.00595	4.53782	1.86498
EEF2	18.6396	17.4252	12.003	23.3942	5.4708
EIF1AX	0.351525	0	0	0	0
EIF3I	0.264838	0	0	0	0
EIF4B	0.23435	0	0	0	0
EIF4G1	0.264838	0	0	0.502575	0
EIF5A2	0.281612	0	0	0	0
ENO1	7.12022	10.7894	10.2855	17.9462	9.51245
ENSA	0.4687	0.4731	0	0	0
EZR	2.25931	0.935	0.541675	0	0
FAM136A	2.17667	1.47635	1.36265	2.2518	1.4497
FAU	0.916425	0	0	1.00305	0
FDX1	0.636188	0	0	0	0
FKBP10	1.57055	0.7952	0.464275	0	0
FKBP3	7.45779	2.19773	2.42243	2.73643	0.761675
FUBP1	0.84965	1.80205	1.2381	0	0
FUS	1.61386	0	0	0	0
GAPDH	24.7321	13.2628	14.299	17.8098	7.24425
GDI2	0.24975	0	0	1.75133	0
GINS4	0.264838	0	0	0	0
GLO1	2.00612	0	0	0	0.70645
GLUL	2.2464	0	0.464275	0.9949	0
GOT1	0.236737	0	0	0	0
GRPEL1	0.3551	0	0	0	0
GSS	0.471087	0	0	0	0
H2AFV	3.65166	1.80945	0	3.27367	4.98808
HDGF	2.13735	0.54495	1.01297	0	0.941925
HINT1	5.03897	3.47525	4.0931	1.3228	1.97667
HINT2	0.6839	0	0.4492	0.473925	0
HIST1H1C	0	0	7.351	0	0
HIST1H1D	22.3544	14.0671	7.54	6.75675	10.4192
HIST1H1E	0	0	0	9.2515	0
HIST1H2AB	0	4.04148	10.4642	7.00275	0
HIST1H2AD	13.8758	4.29988	6.92568	5.27985	9.84185
HIST1H2BB	7.12629	2.33195	7.34745	7.53728	8.266
HIST1H2BG	2.00074	0	0	0	1.47735
HIST1H4H	1.23049	0	2.44045	0	2.35482
HIST3H3	1.33434	0	0.541675	0.529125	0
HMGA1	0.898837	0	0	0	0
HMGB1	4.24145	0	0.4492	1.52915	0
HN1	6.42502	2.0065	3.35395	6.01025	0
HN1L	7.56564	3.17245	2.87913	5.25382	0.941925
HNRNPA0	0.236737	0	0	0	0
HNRNPA1	5.86496	2.18403	1.2602	3.9918	2.46913
HNRNPA2B1	25.2677	16.6568	13.9682	23.164	16.4334
HNRNPA3	0.501575	0	0	0.529125	0
HNRNPAB	0.337162	0	0	0	0
HNRNPC	10.228	6.83845	5.60353	5.95552	6.04725
HNRNPH1	0.870725	0.4731	0	0.746175	0
HNRNPH3	1.00315	0	0	0	0
HNRNPK	3.45631	3.67968	2.0119	7.29697	0.507775
HNRNPL	0	0	0	1.74877	0
HNRNPM	1.37853	1.52218	0.464275	5.51535	0
HNRNPR	0.3551	0.4731	0	0	0
HNRNPU	4.64179	3.67405	1.77975	6.99455	1.55815
HNRPDL	1.6469	1.53337	0	1.70578	0
HSP90AA1	1.4184	0	0	5.2515	1.66985
HSP90AB1	4.10279	1.47635	0.696425	0.710875	0.761675
HSPA1A	60.71	42.8375	45.8802	67.765	35.2828
HSPA5	20.6747	13.9686	14.1735	6.46475	9.33175
HSPA8	8.01812	7.2375	0	0	22.9195
HSPA9	8.6825	8.83732	3.26403	9.9667	3.99017
HSPD1	59.7979	40.1037	32.9487	50.5872	36.87
HSPE1	14.6145	8.46852	7.4767	10.9735	10.9343
HYPK	3.02825	1.00323	0	2.03472	0
IGF2BP1	0.25025	0	0	0	0
ILF3	0.374625	0.709675	0	2.00263	0
ITGB7	0.281612	0	0	0	0
KHDRBS1	0.374625	0	0	0	0
KHSRP	10.7762	8.64428	7.4918	8.50688	5.25148
KIAA1143	0.23435	0	0	0	0
LAMC1	0.23435	0	0	0	0
LAP3	0.3551	0	0	0	0
LDHB	0.651587	0.4731	0	0.473925	0
LLPH	0.374625	1.32533	0	0.49745	0
LMNA	0.264838	0	0	0	0
LMNB1	3.48345	1.54818	0	2.20835	1.7036
LRP1B	0	0	0	0	1.0657
LRRC59	7.7705	2.39455	2.49775	3.79165	0.941925
LSM3	0	0	0.4492	0	0
LSM4	0.337162	0	0	0	0
LYZ	11.2769	1.25463	3.52785	3.27365	1.25412
MANF	1.53525	0	0	0.710875	1.33213
MAT2A	0.636188	0.54495	0	0.971375	0
MAT2B	2.14266	2.3223	1.83652	2.51527	0.49245
MAX	0.264838	0	0	0	0
MDC1	0	0	0	0.753875	0
MDH1	0.501575	0	0	0.753875	0
MDH2	13.6997	6.95787	8.4786	6.5163	7.5001
MEA1	1.23202	1.46513	0.464275	1.50562	0
MEGF6	0.281612	0	0	0.49745	0
MRFAP1	1.68215	0.4731	0	0.49745	0
MRPL12	4.00674	0.817425	1.00595	0.9949	1.0657
MYEOV2	1.1258	0	0	0	0
MYH10	0.236737	0	0	0	0
MYH9	1.0172	0	0	0	0
MYL6	5.72882	4.01098	3.13488	3.55572	0
NACA	1.79265	0.4731	0	1.00002	0
NAP1L1	0.707812	0.4731	0	1.00002	0
NAP1L4	0.515088	0.946225	0	2.4975	0
NCL	3.50311	2.77858	1.80187	2.7283	2.43153
NDUFS6	0.3551	0	0	0	0
NME2	21.4212	8.52112	12.0343	12.9597	14.0474
NOLC1	1.03378	0	0	1.8121	0
NONO	5.00113	4.30028	2.27615	7.99608	0.9849
NPM1	26.1785	20.61	19.2903	28.2755	22.3418
NUCKS1	0.236737	0	0	0	0
NUDC	2.12711	2.45717	0.4492	3.25588	0
PA2G4	0.865962	0	0.464275	0	1.50572
PAICS	1.75717	0	0	1.2278	0
PARK7	13.5442	7.8112	11.7531	10.0015	10.9497
PCMT1	1.15356	0.817425	0.541675	0	0
PCNA	4.90001	8.36432	6.53557	6.7237	3.8736
PCNP	1.53549	0.709675	0.541675	1.02658	0
PDAP1	0.401838	0	0	0	0
PDCD5	2.15685	0	0	0	0
PDIA3	2.24991	2.74828	0.464275	2.44532	2.79745
PDLIM1	1.75194	1.47635	0.464275	1.97398	0
PEBP1	0.506387	0	0	0	1.4129
PFDN1	3.47454	2.1692	0.84565	2.20835	0
PFDN2	4.28474	1.7109	0.898375	3.22575	0
PFDN6	1.70296	0	0	0.793675	0
PFN1	1.75564	1.54818	1.12755	2.5031	1.4497
PGAM1	17.512	8.54407	8.70365	13.7538	10.5395
PGK1	7.88526	5.19555	6.8954	6.524	6.53202
PHB	0	0	0	0.502575	0
PIN1	2.49686	0.4731	0.4492	1.2278	0
PIN4	0.44955	0	0	0	0
PKM	0.7383	0.530125	0	2.78048	0
PNPO	0.857337	0	0	0.502575	0
POLE3	2.78586	0.946225	1.5948	1.74877	0
PPA1	0.24975	0	0	0.473925	0
PPIA	33.116	22.053	23.2037	24.0015	19.3247
PPIB	0.502238	0	0	0	0
PPIF	3.77035	1.54818	3.5203	2.28045	0
PPM1G	0.236737	0	0	0	0
PPP1R8	0.619938	0	0	0	0
PRDX1	21.8185	13.7695	14.5653	12.4608	11.7177
PRDX2	8.66868	4.25675	4.99003	3.50355	4.24715
PRDX3	3.52946	1.00685	2.0119	0	0
PRDX6	1.35688	0.946225	1.13805	2.25438	0
PRKCSH	2.13374	1.97798	0	1.75133	0
PRPF4B	0	0	0	0.473925	0
PRRC2A	0	0	0	1.74877	0
PRSS1	0.351525	0	0	0	0
PSMA6	0.23435	0.4731	0	0	0
RANBP1	9.05201	5.51943	4.3413	5.48112	2.14082
RAP1B	0	0.4731	0	0	0
RBM3	3.92351	2.97363	2.14403	3.96015	1.30705
RBMX	0.752363	0	0	0	0
RCC2	0	0	0	0.49745	0
RNASET2	0	0	0.4492	0	0
RNPS1	0.236737	0	0	0	0
RPL12	1.26799	1.2398	1.02805	3.74008	1.00022
RPL23A	4.10129	0.7952	1.10545	1.53215	0.49245
RPL24	0	0	0	0.49745	0
RPL26	0.236737	0	0	0.502575	0
RPL29	2.01072	1.50487	0	1.00305	0
RPL5	1.1542	1.00323	0	0	0
RPL6	0.3551	0	0	0	0
RPL7A	0.24975	0	0	0	0
RPLP1	0.942163	0	0	0	0
RPLP2	2.77765	0	0	0.502575	0
RPS10	0.619938	0	0	0	0
RPS12	0	0	0	0.502575	0
RPS17L	4.04924	3.2784	0	2.25438	0
RPS19	7.76236	5.47975	4.25138	5.9724	3.4824
RPS21	13.5274	9.84083	11.2218	14.4898	7.70578
RPS28	6.59762	2.68745	3.56248	4.49287	2.33723
RPS5	2.22315	1.01805	0.563775	2.00307	0.49245
RPS7	0	3.7266	0.541675	3.75077	1.50035
RPSA	4.40631	2.05722	0.541675	2.1966	0
RUVBL1	0	0	0	1.00515	0
SAFB	0.3551	0	0	0.49745	0
SARNP	1.35878	0	1.2381	1.77788	0
SARS	0.397263	0.530125	0	0.9765	0
SDHA	0.264838	0	0	0	0
SEPT2	4.79165	3.7118	3.53485	3.79632	0
SERBP1	3.63789	2.035	1.14562	2.47655	1.1774
SF1	1.11363	2.41498	0	3.25332	0
SF3A1	0.264838	0	0	0	0
SF3B2	0.752363	1.50487	0.464275	1.53428	0
SFPQ	9.9779	6.74202	5.46585	8.5491	6.24175
SNAP29	0	0	0	0.49745	0
SNRPD1	0.674312	0	0	0	0
SNRPD2	0.422413	0	0	0	0
SNRPE	0.473463	0	0	0	0
SNW1	0.730475	0.709675	0	1.50005	0
SOD1	13.7112	8.28063	8.50815	9.53622	10.8018
SRP14	1.47822	1.46513	0.464275	1.50005	0
SRP9	0.3551	0	0	0	0
SRRM2	1.8801	0	0	4.0476	0
SRSF1	0.264838	0	0	0	0
SRSF10	0	0	0.563775	0	0
SRSF3	0.236737	0	0	0	0
SRSF4	0.625125	0	0	0	0
SRSF5	0.24975	0	0	0	0
SRSF6	3.48561	1.00685	2.45352	4.72727	0
SSBP1	2.25586	3.96203	0	0	0
ST13	3.78336	0.709675	0.696425	1.3228	0
STIP1	3.41374	0.4731	0	0	0
STMN1	7.13187	3.78182	4.63678	6.0169	3.74883
SUB1	1.18854	2.20332	1.5948	1.78045	1.4129
SYNCRIP	0	0	0	0.49745	0
TAF15	0.884787	0	0	0.49745	0
TAGLN2	2.71531	1.47635	0.541675	2.7058	0
TALDO1	0.397263	0.709675	0	0	0.507775
TBCA	7.62732	2.71415	1.90433	1.72267	1.50572
TCOF1	3.03667	2.0065	1.50893	4.03223	0
THRAP3	0.967213	0	0	1.25645	0
TIMM13	1.28543	0.4619	0.541675	1.2753	0
TIMM8A	4.95951	2.3223	1.60235	2.477	1.1989
TIMM9	0.236737	0	0	0	0
TJP1	0.25025	0	0	0.746175	0
TKT	9.3265	3.94275	5.77837	5.56695	7.96992
TMA7	0.375375	0	0	0	0
TMPO	0.730475	0	0	1.50005	0
TNC	0	0	0.563775	0	0
TPD52	1.53635	1.50487	0	2.0082	0
TPD52L2	0.751325	1.2398	0	0.49745	0
TPI1	41.6494	20.7127	27.531	24.9765	23.563
TPM1	3.15587	0	0	0	3.65595
TPM3	7.16825	2.72785	4.9935	6.25793	0
TRIM28	0	0	0	1.24875	0
TUBA1C	1.53715	0	0	0.49745	0
TUBB2A	1.34062	0	0.696425	1.49235	0.761675
TUBB3	0.499487	0.709675	0	0	0
TUBB4B	0.397263	0	0	0	0
TXN	0	2.23185	0	0	0
UCHL1	0	0	0	0.753875	0
UQCRH	3.38859	0.69285	0	0	0
VBP1	0.25025	1.00323	0	1.53985	0
VCP	0.23435	0	0	0	0
VDAC1	0.502238	0	0	0	0
VIM	10.1271	8.7485	6.52048	14.9876	8.018
VLDLR	0	0.530125	0	0	0
YBX1	10.5183	4.48607	2.70832	1.74877	1.0657
YWHAB	0.70305	0	0	0	0
YWHAQ	1.38636	0	0	0.746175	0
YWHAZ	3.03057	0	1.08333	1.50005	0
ZNF428	1.10508	0	0	0	0
ZRANB2	1.31924	0.7952	0.696425	1.5026	0
