# Supplementary material for: Analysis of networks of host proteins in the early time points following HIV transduction
Source: BMC Bioinformatics. 2019 Jul 17;20:398. doi: 10.1186/s12859-019-2990-3 (PMC6637640; doi:10.1186/s12859-019-2990-3)
Supplement: Supplementary file 5 — Statistical analysis of network parameters. The FDR-corrected p value and z score for the 4 h and 12 h time points, respectively, in case of each network parameter calculated (N, Nf, Nn, E, Ef, En, Ec, S, Sf, Sn, Sc, D, Df, Dn, Dc, Rf, Rn, Rc) for each GO function presented in Additional file 4. (XLSX 287 kb) [file 12859_2019_2990_MOESM5_ESM.xlsx]

## Sheet: P values
GO function	variable	FDR corrected p value 4 h	z score 4 h		GO function	variable	FDR corrected p value 12 h	z score 12 h
GO.0000166	D	0.0140806854063551	-2.45519839480554		GO.0000184	D	1.33405842702236e-05	4.35444274247613
GO.0000184	D	0.0140806854063551	-2.45519839480554		GO.0000228	D	1.33405842702236e-05	4.35444274247613
GO.0000228	D	0.0140806854063551	-2.45519839480554		GO.0000375	D	1.33405842702236e-05	4.35444274247613
GO.0000375	D	0.0140806854063551	-2.45519839480554		GO.0000398	D	1.33405842702236e-05	4.35444274247613
GO.0000398	D	0.0140806854063551	-2.45519839480554		GO.0000785	D	1.33405842702236e-05	4.35444274247613
GO.0000785	D	0.0140806854063551	-2.45519839480554		GO.0000956	D	1.33405842702236e-05	4.35444274247613
GO.0000956	D	0.0140806854063551	-2.45519839480554		GO.0003674	D	1.33405842702236e-05	4.35444274247613
GO.0003674	D	0.0140806854063551	-2.45519839480554		GO.0003676	D	1.33405842702236e-05	4.35444274247613
GO.0003676	D	0.0140806854063551	-2.45519839480554		GO.0003677	D	1.33405842702236e-05	4.35444274247613
GO.0003677	D	0.0140806854063551	-2.45519839480554		GO.0003697	D	1.33405842702236e-05	4.35444274247613
GO.0003697	D	0.0140806854063551	-2.45519839480554		GO.0003723	D	1.33405842702236e-05	4.35444274247613
GO.0003723	D	0.0140806854063551	-2.45519839480554		GO.0003729	D	1.33405842702236e-05	4.35444274247613
GO.0003729	D	0.0140806854063551	-2.45519839480554		GO.0003735	D	1.33405842702236e-05	4.35444274247613
GO.0003735	D	0.0140806854063551	-2.45519839480554		GO.0005198	D	1.33405842702236e-05	4.35444274247613
GO.0005198	D	0.0140806854063551	-2.45519839480554		GO.0005488	D	1.33405842702236e-05	4.35444274247613
GO.0005488	D	0.0140806854063551	-2.45519839480554		GO.0005515	D	1.33405842702236e-05	4.35444274247613
GO.0005515	D	0.0140806854063551	-2.45519839480554		GO.0005524	D	1.33405842702236e-05	4.35444274247613
GO.0005524	D	0.0140806854063551	-2.45519839480554		GO.0005576	D	1.33405842702236e-05	4.35444274247613
GO.0005576	D	0.0140806854063551	-2.45519839480554		GO.0005615	D	1.33405842702236e-05	4.35444274247613
GO.0005615	D	0.0140806854063551	-2.45519839480554		GO.0005622	D	1.33405842702236e-05	4.35444274247613
GO.0005622	D	0.0140806854063551	-2.45519839480554		GO.0005634	D	1.33405842702236e-05	4.35444274247613
GO.0005634	D	0.0140806854063551	-2.45519839480554		GO.0005654	D	1.33405842702236e-05	4.35444274247613
GO.0005654	D	0.0140806854063551	-2.45519839480554		GO.0005681	D	1.33405842702236e-05	4.35444274247613
GO.0005681	D	0.0140806854063551	-2.45519839480554		GO.0005694	D	1.33405842702236e-05	4.35444274247613
GO.0005694	D	0.0140806854063551	-2.45519839480554		GO.0005730	D	1.33405842702236e-05	4.35444274247613
GO.0005730	D	0.0140806854063551	-2.45519839480554		GO.0005737	D	1.33405842702236e-05	4.35444274247613
GO.0005737	D	0.0140806854063551	-2.45519839480554		GO.0005739	D	1.33405842702236e-05	4.35444274247613
GO.0005739	D	0.0140806854063551	-2.45519839480554		GO.0005740	D	1.33405842702236e-05	4.35444274247613
GO.0005740	D	0.0140806854063551	-2.45519839480554		GO.0005743	D	1.33405842702236e-05	4.35444274247613
GO.0005743	D	0.0140806854063551	-2.45519839480554		GO.0005759	D	1.33405842702236e-05	4.35444274247613
GO.0005759	D	0.0140806854063551	-2.45519839480554		GO.0005829	D	1.33405842702236e-05	4.35444274247613
GO.0005829	D	0.0140806854063551	-2.45519839480554		GO.0005840	D	1.33405842702236e-05	4.35444274247613
GO.0005840	D	0.0140806854063551	-2.45519839480554		GO.0005856	D	1.33405842702236e-05	4.35444274247613
GO.0005856	D	0.0140806854063551	-2.45519839480554		GO.0005874	D	1.33405842702236e-05	4.35444274247613
GO.0005874	D	0.0140806854063551	-2.45519839480554		GO.0005912	D	1.33405842702236e-05	4.35444274247613
GO.0005912	D	0.0140806854063551	-2.45519839480554		GO.0005925	D	1.33405842702236e-05	4.35444274247613
GO.0005925	D	0.0140806854063551	-2.45519839480554		GO.0006091	D	1.33405842702236e-05	4.35444274247613
GO.0006091	D	0.0140806854063551	-2.45519839480554		GO.0006139	D	1.33405842702236e-05	4.35444274247613
GO.0006139	D	0.0140806854063551	-2.45519839480554		GO.0006325	D	1.33405842702236e-05	4.35444274247613
GO.0006325	D	0.0140806854063551	-2.45519839480554		GO.0006351	D	1.33405842702236e-05	4.35444274247613
GO.0006351	D	0.0140806854063551	-2.45519839480554		GO.0006366	D	1.33405842702236e-05	4.35444274247613
GO.0006366	D	0.0140806854063551	-2.45519839480554		GO.0006367	D	1.33405842702236e-05	4.35444274247613
GO.0006367	D	0.0140806854063551	-2.45519839480554		GO.0006396	D	1.33405842702236e-05	4.35444274247613
GO.0006396	D	0.0140806854063551	-2.45519839480554		GO.0006397	D	1.33405842702236e-05	4.35444274247613
GO.0006397	D	0.0140806854063551	-2.45519839480554		GO.0006401	D	1.33405842702236e-05	4.35444274247613
GO.0006401	D	0.0140806854063551	-2.45519839480554		GO.0006402	D	1.33405842702236e-05	4.35444274247613
GO.0006402	D	0.0140806854063551	-2.45519839480554		GO.0006412	D	1.33405842702236e-05	4.35444274247613
GO.0006412	D	0.0140806854063551	-2.45519839480554		GO.0006413	D	1.33405842702236e-05	4.35444274247613
GO.0006413	D	0.0140806854063551	-2.45519839480554		GO.0006414	D	1.33405842702236e-05	4.35444274247613
GO.0006414	D	0.0140806854063551	-2.45519839480554		GO.0006415	D	1.33405842702236e-05	4.35444274247613
GO.0006415	D	0.0140806854063551	-2.45519839480554		GO.0006417	D	1.33405842702236e-05	4.35444274247613
GO.0006417	D	0.0140806854063551	-2.45519839480554		GO.0006457	D	1.33405842702236e-05	4.35444274247613
GO.0006457	D	0.0140806854063551	-2.45519839480554		GO.0006461	D	1.33405842702236e-05	4.35444274247613
GO.0006461	D	0.0140806854063551	-2.45519839480554		GO.0006518	D	1.33405842702236e-05	4.35444274247613
GO.0006518	D	0.0140806854063551	-2.45519839480554		GO.0006605	D	1.33405842702236e-05	4.35444274247613
GO.0006605	D	0.0140806854063551	-2.45519839480554		GO.0006614	D	1.33405842702236e-05	4.35444274247613
GO.0006614	D	0.0140806854063551	-2.45519839480554		GO.0006725	D	1.33405842702236e-05	4.35444274247613
GO.0006725	D	0.0140806854063551	-2.45519839480554		GO.0006732	D	1.33405842702236e-05	4.35444274247613
GO.0006732	D	0.0140806854063551	-2.45519839480554		GO.0006753	D	1.33405842702236e-05	4.35444274247613
GO.0006753	D	0.0140806854063551	-2.45519839480554		GO.0006810	D	1.33405842702236e-05	4.35444274247613
GO.0006810	D	0.0140806854063551	-2.45519839480554		GO.0006886	D	1.33405842702236e-05	4.35444274247613
GO.0006886	D	0.0140806854063551	-2.45519839480554		GO.0006913	D	1.33405842702236e-05	4.35444274247613
GO.0006913	D	0.0140806854063551	-2.45519839480554		GO.0006950	D	1.33405842702236e-05	4.35444274247613
GO.0006950	D	0.0140806854063551	-2.45519839480554		GO.0006996	D	1.33405842702236e-05	4.35444274247613
GO.0006996	D	0.0140806854063551	-2.45519839480554		GO.0008104	D	1.33405842702236e-05	4.35444274247613
GO.0008104	D	0.0140806854063551	-2.45519839480554		GO.0008152	D	1.33405842702236e-05	4.35444274247613
GO.0008152	D	0.0140806854063551	-2.45519839480554		GO.0008380	D	1.33405842702236e-05	4.35444274247613
GO.0008380	D	0.0140806854063551	-2.45519839480554		GO.0009056	D	1.33405842702236e-05	4.35444274247613
GO.0009056	D	0.0140806854063551	-2.45519839480554		GO.0009058	D	1.33405842702236e-05	4.35444274247613
GO.0009058	D	0.0140806854063551	-2.45519839480554		GO.0009116	D	1.33405842702236e-05	4.35444274247613
GO.0009116	D	0.0140806854063551	-2.45519839480554		GO.0009117	D	1.33405842702236e-05	4.35444274247613
GO.0009117	D	0.0140806854063551	-2.45519839480554		GO.0009123	D	1.33405842702236e-05	4.35444274247613
GO.0009123	D	0.0140806854063551	-2.45519839480554		GO.0009141	D	1.33405842702236e-05	4.35444274247613
GO.0009141	D	0.0140806854063551	-2.45519839480554		GO.0009150	D	1.33405842702236e-05	4.35444274247613
GO.0009150	D	0.0140806854063551	-2.45519839480554		GO.0009163	D	1.33405842702236e-05	4.35444274247613
GO.0009163	D	0.0140806854063551	-2.45519839480554		GO.0009167	D	1.33405842702236e-05	4.35444274247613
GO.0009167	D	0.0140806854063551	-2.45519839480554		GO.0009205	D	1.33405842702236e-05	4.35444274247613
GO.0009205	D	0.0140806854063551	-2.45519839480554		GO.0009892	D	1.33405842702236e-05	4.35444274247613
GO.0009892	D	0.0140806854063551	-2.45519839480554		GO.0009987	D	1.33405842702236e-05	4.35444274247613
GO.0009987	D	0.0140806854063551	-2.45519839480554		GO.0010467	D	1.33405842702236e-05	4.35444274247613
GO.0010467	D	0.0140806854063551	-2.45519839480554		GO.0010468	D	1.33405842702236e-05	4.35444274247613
GO.0010468	D	0.0140806854063551	-2.45519839480554		GO.0010556	D	1.33405842702236e-05	4.35444274247613
GO.0010556	D	0.0140806854063551	-2.45519839480554		GO.0010608	D	1.33405842702236e-05	4.35444274247613
GO.0010608	D	0.0140806854063551	-2.45519839480554		GO.0010629	D	1.33405842702236e-05	4.35444274247613
GO.0010629	D	0.0140806854063551	-2.45519839480554		GO.0010638	D	1.33405842702236e-05	4.35444274247613
GO.0010638	D	0.0140806854063551	-2.45519839480554		GO.0010821	D	1.33405842702236e-05	4.35444274247613
GO.0010821	D	0.0140806854063551	-2.45519839480554		GO.0010941	D	1.33405842702236e-05	4.35444274247613
GO.0010941	D	0.0140806854063551	-2.45519839480554		GO.0015031	D	1.33405842702236e-05	4.35444274247613
GO.0015031	D	0.0140806854063551	-2.45519839480554		GO.0015629	D	1.33405842702236e-05	4.35444274247613
GO.0015629	D	0.0140806854063551	-2.45519839480554		GO.0015630	D	1.33405842702236e-05	4.35444274247613
GO.0015630	D	0.0140806854063551	-2.45519839480554		GO.0016032	D	1.33405842702236e-05	4.35444274247613
GO.0016032	D	0.0140806854063551	-2.45519839480554		GO.0016043	D	1.33405842702236e-05	4.35444274247613
GO.0016043	D	0.0140806854063551	-2.45519839480554		GO.0016070	D	1.33405842702236e-05	4.35444274247613
GO.0016070	D	0.0140806854063551	-2.45519839480554		GO.0016071	D	1.33405842702236e-05	4.35444274247613
GO.0016071	D	0.0140806854063551	-2.45519839480554		GO.0016482	D	1.33405842702236e-05	4.35444274247613
GO.0016482	D	0.0140806854063551	-2.45519839480554		GO.0016604	D	1.33405842702236e-05	4.35444274247613
GO.0016604	D	0.0140806854063551	-2.45519839480554		GO.0017076	D	1.33405842702236e-05	4.35444274247613
GO.0017076	D	0.0140806854063551	-2.45519839480554		GO.0018130	D	1.33405842702236e-05	4.35444274247613
GO.0018130	D	0.0140806854063551	-2.45519839480554		GO.0019058	D	1.33405842702236e-05	4.35444274247613
GO.0019058	D	0.0140806854063551	-2.45519839480554		GO.0019080	D	1.33405842702236e-05	4.35444274247613
GO.0019080	D	0.0140806854063551	-2.45519839480554		GO.0019083	D	1.33405842702236e-05	4.35444274247613
GO.0019083	D	0.0140806854063551	-2.45519839480554		GO.0019222	D	1.33405842702236e-05	4.35444274247613
GO.0019222	D	0.0140806854063551	-2.45519839480554		GO.0019438	D	1.33405842702236e-05	4.35444274247613
GO.0019438	D	0.0140806854063551	-2.45519839480554		GO.0019538	D	1.33405842702236e-05	4.35444274247613
GO.0019538	D	0.0140806854063551	-2.45519839480554		GO.0019637	D	1.33405842702236e-05	4.35444274247613
GO.0019637	D	0.0140806854063551	-2.45519839480554		GO.0019693	D	1.33405842702236e-05	4.35444274247613
GO.0019693	D	0.0140806854063551	-2.45519839480554		GO.0019866	D	1.33405842702236e-05	4.35444274247613
GO.0019866	D	0.0140806854063551	-2.45519839480554		GO.0019899	D	1.33405842702236e-05	4.35444274247613
GO.0019899	D	0.0140806854063551	-2.45519839480554		GO.0019900	D	1.33405842702236e-05	4.35444274247613
GO.0019900	D	0.0140806854063551	-2.45519839480554		GO.0019901	D	1.33405842702236e-05	4.35444274247613
GO.0019901	D	0.0140806854063551	-2.45519839480554		GO.0022411	D	1.33405842702236e-05	4.35444274247613
GO.0022411	D	0.0140806854063551	-2.45519839480554		GO.0022607	D	1.33405842702236e-05	4.35444274247613
GO.0022607	D	0.0140806854063551	-2.45519839480554		GO.0022613	D	1.33405842702236e-05	4.35444274247613
GO.0022613	D	0.0140806854063551	-2.45519839480554		GO.0022626	D	1.33405842702236e-05	4.35444274247613
GO.0022626	D	0.0140806854063551	-2.45519839480554		GO.0030054	D	1.33405842702236e-05	4.35444274247613
GO.0030054	D	0.0140806854063551	-2.45519839480554		GO.0030529	D	1.33405842702236e-05	4.35444274247613
GO.0030529	D	0.0140806854063551	-2.45519839480554		GO.0030554	D	1.33405842702236e-05	4.35444274247613
GO.0030554	D	0.0140806854063551	-2.45519839480554		GO.0031625	D	1.33405842702236e-05	4.35444274247613
GO.0031625	D	0.0140806854063551	-2.45519839480554		GO.0031966	D	1.33405842702236e-05	4.35444274247613
GO.0031966	D	0.0140806854063551	-2.45519839480554		GO.0031967	D	1.33405842702236e-05	4.35444274247613
GO.0031967	D	0.0140806854063551	-2.45519839480554		GO.0031974	D	1.33405842702236e-05	4.35444274247613
GO.0031974	D	0.0140806854063551	-2.45519839480554		GO.0031981	D	1.33405842702236e-05	4.35444274247613
GO.0031981	D	0.0140806854063551	-2.45519839480554		GO.0031982	D	1.33405842702236e-05	4.35444274247613
GO.0031982	D	0.0140806854063551	-2.45519839480554		GO.0031988	D	1.33405842702236e-05	4.35444274247613
GO.0031988	D	0.0140806854063551	-2.45519839480554		GO.0032550	D	1.33405842702236e-05	4.35444274247613
GO.0032550	D	0.0140806854063551	-2.45519839480554		GO.0032553	D	1.33405842702236e-05	4.35444274247613
GO.0032553	D	0.0140806854063551	-2.45519839480554		GO.0032555	D	1.33405842702236e-05	4.35444274247613
GO.0032555	D	0.0140806854063551	-2.45519839480554		GO.0032774	D	1.33405842702236e-05	4.35444274247613
GO.0032774	D	0.0140806854063551	-2.45519839480554		GO.0032991	D	1.33405842702236e-05	4.35444274247613
GO.0032991	D	0.0140806854063551	-2.45519839480554		GO.0033036	D	1.33405842702236e-05	4.35444274247613
GO.0033036	D	0.0140806854063551	-2.45519839480554		GO.0033365	D	1.33405842702236e-05	4.35444274247613
GO.0033365	D	0.0140806854063551	-2.45519839480554		GO.0034248	D	1.33405842702236e-05	4.35444274247613
GO.0034248	D	0.0140806854063551	-2.45519839480554		GO.0034613	D	1.33405842702236e-05	4.35444274247613
GO.0034613	D	0.0140806854063551	-2.45519839480554		GO.0034622	D	1.33405842702236e-05	4.35444274247613
GO.0034622	D	0.0140806854063551	-2.45519839480554		GO.0034641	D	1.33405842702236e-05	4.35444274247613
GO.0034641	D	0.0140806854063551	-2.45519839480554		GO.0034645	D	1.33405842702236e-05	4.35444274247613
GO.0034645	D	0.0140806854063551	-2.45519839480554		GO.0034654	D	1.33405842702236e-05	4.35444274247613
GO.0034654	D	0.0140806854063551	-2.45519839480554		GO.0034655	D	1.33405842702236e-05	4.35444274247613
GO.0034655	D	0.0140806854063551	-2.45519839480554		GO.0035639	D	1.33405842702236e-05	4.35444274247613
GO.0035639	D	0.0140806854063551	-2.45519839480554		GO.0036094	D	1.33405842702236e-05	4.35444274247613
GO.0036094	D	0.0140806854063551	-2.45519839480554		GO.0042802	D	1.33405842702236e-05	4.35444274247613
GO.0042802	D	0.0140806854063551	-2.45519839480554		GO.0042981	D	1.33405842702236e-05	4.35444274247613
GO.0042981	D	0.0140806854063551	-2.45519839480554		GO.0043005	D	1.33405842702236e-05	4.35444274247613
GO.0043005	D	0.0140806854063551	-2.45519839480554		GO.0043065	D	1.33405842702236e-05	4.35444274247613
GO.0043065	D	0.0140806854063551	-2.45519839480554		GO.0043066	D	1.33405842702236e-05	4.35444274247613
GO.0043066	D	0.0140806854063551	-2.45519839480554		GO.0043209	D	1.33405842702236e-05	4.35444274247613
GO.0043209	D	0.0140806854063551	-2.45519839480554		GO.0043226	D	1.33405842702236e-05	4.35444274247613
GO.0043226	D	0.0140806854063551	-2.45519839480554		GO.0043227	D	1.33405842702236e-05	4.35444274247613
GO.0043227	D	0.0140806854063551	-2.45519839480554		GO.0043229	D	1.33405842702236e-05	4.35444274247613
GO.0043229	D	0.0140806854063551	-2.45519839480554		GO.0043231	D	1.33405842702236e-05	4.35444274247613
GO.0043231	D	0.0140806854063551	-2.45519839480554		GO.0043232	D	1.33405842702236e-05	4.35444274247613
GO.0043232	D	0.0140806854063551	-2.45519839480554		GO.0043233	D	1.33405842702236e-05	4.35444274247613
GO.0043233	D	0.0140806854063551	-2.45519839480554		GO.0043234	D	1.33405842702236e-05	4.35444274247613
GO.0043234	D	0.0140806854063551	-2.45519839480554		GO.0043566	D	1.33405842702236e-05	4.35444274247613
GO.0043566	D	0.0140806854063551	-2.45519839480554		GO.0043624	D	1.33405842702236e-05	4.35444274247613
GO.0043624	D	0.0140806854063551	-2.45519839480554		GO.0043933	D	1.33405842702236e-05	4.35444274247613
GO.0043933	D	0.0140806854063551	-2.45519839480554		GO.0044085	D	1.33405842702236e-05	4.35444274247613
GO.0044085	D	0.0140806854063551	-2.45519839480554		GO.0044237	D	1.33405842702236e-05	4.35444274247613
GO.0044237	D	0.0140806854063551	-2.45519839480554		GO.0044238	D	1.33405842702236e-05	4.35444274247613
GO.0044238	D	0.0140806854063551	-2.45519839480554		GO.0044248	D	1.33405842702236e-05	4.35444274247613
GO.0044248	D	0.0140806854063551	-2.45519839480554		GO.0044249	D	1.33405842702236e-05	4.35444274247613
GO.0044249	D	0.0140806854063551	-2.45519839480554		GO.0044260	D	1.33405842702236e-05	4.35444274247613
GO.0044260	D	0.0140806854063551	-2.45519839480554		GO.0044265	D	1.33405842702236e-05	4.35444274247613
GO.0044265	D	0.0140806854063551	-2.45519839480554		GO.0044267	D	1.33405842702236e-05	4.35444274247613
GO.0044267	D	0.0140806854063551	-2.45519839480554		GO.0044271	D	1.33405842702236e-05	4.35444274247613
GO.0044271	D	0.0140806854063551	-2.45519839480554		GO.0044297	D	1.33405842702236e-05	4.35444274247613
GO.0044297	D	0.0140806854063551	-2.45519839480554		GO.0044391	D	1.33405842702236e-05	4.35444274247613
GO.0044391	D	0.0140806854063551	-2.45519839480554		GO.0044421	D	1.33405842702236e-05	4.35444274247613
GO.0044421	D	0.0140806854063551	-2.45519839480554		GO.0044422	D	1.33405842702236e-05	4.35444274247613
GO.0044422	D	0.0140806854063551	-2.45519839480554		GO.0044424	D	1.33405842702236e-05	4.35444274247613
GO.0044424	D	0.0140806854063551	-2.45519839480554		GO.0044427	D	1.33405842702236e-05	4.35444274247613
GO.0044427	D	0.0140806854063551	-2.45519839480554		GO.0044428	D	1.33405842702236e-05	4.35444274247613
GO.0044428	D	0.0140806854063551	-2.45519839480554		GO.0044429	D	1.33405842702236e-05	4.35444274247613
GO.0044429	D	0.0140806854063551	-2.45519839480554		GO.0044430	D	1.33405842702236e-05	4.35444274247613
GO.0044430	D	0.0140806854063551	-2.45519839480554		GO.0044444	D	1.33405842702236e-05	4.35444274247613
GO.0044444	D	0.0140806854063551	-2.45519839480554		GO.0044445	D	1.33405842702236e-05	4.35444274247613
GO.0044445	D	0.0140806854063551	-2.45519839480554		GO.0044446	D	1.33405842702236e-05	4.35444274247613
GO.0044446	D	0.0140806854063551	-2.45519839480554		GO.0044451	D	1.33405842702236e-05	4.35444274247613
GO.0044451	D	0.0140806854063551	-2.45519839480554		GO.0044454	D	1.33405842702236e-05	4.35444274247613
GO.0044454	D	0.0140806854063551	-2.45519839480554		GO.0044711	D	1.33405842702236e-05	4.35444274247613
GO.0044711	D	0.0140806854063551	-2.45519839480554		GO.0044712	D	1.33405842702236e-05	4.35444274247613
GO.0044712	D	0.0140806854063551	-2.45519839480554		GO.0044765	D	1.33405842702236e-05	4.35444274247613
GO.0044765	D	0.0140806854063551	-2.45519839480554		GO.0044802	D	1.33405842702236e-05	4.35444274247613
GO.0044802	D	0.0140806854063551	-2.45519839480554		GO.0044822	D	1.33405842702236e-05	4.35444274247613
GO.0044822	D	0.0140806854063551	-2.45519839480554		GO.0045184	D	1.33405842702236e-05	4.35444274247613
GO.0045184	D	0.0140806854063551	-2.45519839480554		GO.0046128	D	1.33405842702236e-05	4.35444274247613
GO.0046128	D	0.0140806854063551	-2.45519839480554		GO.0046483	D	1.33405842702236e-05	4.35444274247613
GO.0046483	D	0.0140806854063551	-2.45519839480554		GO.0046496	D	1.33405842702236e-05	4.35444274247613
GO.0046496	D	0.0140806854063551	-2.45519839480554		GO.0046907	D	1.33405842702236e-05	4.35444274247613
GO.0046907	D	0.0140806854063551	-2.45519839480554		GO.0048519	D	1.33405842702236e-05	4.35444274247613
GO.0048519	D	0.0140806854063551	-2.45519839480554		GO.0051082	D	1.33405842702236e-05	4.35444274247613
GO.0051082	D	0.0140806854063551	-2.45519839480554		GO.0051084	D	1.33405842702236e-05	4.35444274247613
GO.0051084	D	0.0140806854063551	-2.45519839480554		GO.0051179	D	1.33405842702236e-05	4.35444274247613
GO.0051179	D	0.0140806854063551	-2.45519839480554		GO.0051234	D	1.33405842702236e-05	4.35444274247613
GO.0051234	D	0.0140806854063551	-2.45519839480554		GO.0051641	D	1.33405842702236e-05	4.35444274247613
GO.0051641	D	0.0140806854063551	-2.45519839480554		GO.0051649	D	1.33405842702236e-05	4.35444274247613
GO.0051649	D	0.0140806854063551	-2.45519839480554		GO.0051704	D	1.33405842702236e-05	4.35444274247613
GO.0051704	D	0.0140806854063551	-2.45519839480554		GO.0055086	D	1.33405842702236e-05	4.35444274247613
GO.0055086	D	0.0140806854063551	-2.45519839480554		GO.0055114	D	1.33405842702236e-05	4.35444274247613
GO.0055114	D	0.0140806854063551	-2.45519839480554		GO.0060255	D	1.33405842702236e-05	4.35444274247613
GO.0060255	D	0.0140806854063551	-2.45519839480554		GO.0060548	D	1.33405842702236e-05	4.35444274247613
GO.0060548	D	0.0140806854063551	-2.45519839480554		GO.0061024	D	1.33405842702236e-05	4.35444274247613
GO.0061024	D	0.0140806854063551	-2.45519839480554		GO.0065003	D	1.33405842702236e-05	4.35444274247613
GO.0065003	D	0.0140806854063551	-2.45519839480554		GO.0070013	D	1.33405842702236e-05	4.35444274247613
GO.0070013	D	0.0140806854063551	-2.45519839480554		GO.0070062	D	1.33405842702236e-05	4.35444274247613
GO.0070062	D	0.0140806854063551	-2.45519839480554		GO.0070271	D	1.33405842702236e-05	4.35444274247613
GO.0070271	D	0.0140806854063551	-2.45519839480554		GO.0070972	D	1.33405842702236e-05	4.35444274247613
GO.0070972	D	0.0140806854063551	-2.45519839480554		GO.0071013	D	1.33405842702236e-05	4.35444274247613
GO.0071013	D	0.0140806854063551	-2.45519839480554		GO.0071702	D	1.33405842702236e-05	4.35444274247613
GO.0071702	D	0.0140806854063551	-2.45519839480554		GO.0071704	D	1.33405842702236e-05	4.35444274247613
GO.0071704	D	0.0140806854063551	-2.45519839480554		GO.0071705	D	1.33405842702236e-05	4.35444274247613
GO.0071705	D	0.0140806854063551	-2.45519839480554		GO.0071822	D	1.33405842702236e-05	4.35444274247613
GO.0071822	D	0.0140806854063551	-2.45519839480554		GO.0071840	D	1.33405842702236e-05	4.35444274247613
GO.0071840	D	0.0140806854063551	-2.45519839480554		GO.0072521	D	1.33405842702236e-05	4.35444274247613
GO.0072521	D	0.0140806854063551	-2.45519839480554		GO.0072524	D	1.33405842702236e-05	4.35444274247613
GO.0072524	D	0.0140806854063551	-2.45519839480554		GO.0072594	D	1.33405842702236e-05	4.35444274247613
GO.0072594	D	0.0140806854063551	-2.45519839480554		GO.0080090	D	1.33405842702236e-05	4.35444274247613
GO.0080090	D	0.0140806854063551	-2.45519839480554		GO.0080135	D	1.33405842702236e-05	4.35444274247613
GO.0080135	D	0.0140806854063551	-2.45519839480554		GO.0090304	D	1.33405842702236e-05	4.35444274247613
GO.0090304	D	0.0140806854063551	-2.45519839480554		GO.0097159	D	1.33405842702236e-05	4.35444274247613
GO.0097159	D	0.0140806854063551	-2.45519839480554		GO.0097367	D	1.33405842702236e-05	4.35444274247613
GO.0097367	D	0.0140806854063551	-2.45519839480554		GO.1901135	D	1.33405842702236e-05	4.35444274247613
GO.1901135	D	0.0140806854063551	-2.45519839480554		GO.1901265	D	1.33405842702236e-05	4.35444274247613
GO.1901265	D	0.0140806854063551	-2.45519839480554		GO.1901360	D	1.33405842702236e-05	4.35444274247613
GO.1901360	D	0.0140806854063551	-2.45519839480554		GO.1901362	D	1.33405842702236e-05	4.35444274247613
GO.1901362	D	0.0140806854063551	-2.45519839480554		GO.1901363	D	1.33405842702236e-05	4.35444274247613
GO.1901363	D	0.0140806854063551	-2.45519839480554		GO.1901564	D	1.33405842702236e-05	4.35444274247613
GO.1901564	D	0.0140806854063551	-2.45519839480554		GO.1901566	D	1.33405842702236e-05	4.35444274247613
GO.1901566	D	0.0140806854063551	-2.45519839480554		GO.1901575	D	1.33405842702236e-05	4.35444274247613
GO.1901575	D	0.0140806854063551	-2.45519839480554		GO.1901576	D	1.33405842702236e-05	4.35444274247613
GO.1901576	D	0.0140806854063551	-2.45519839480554		GO.1902580	D	1.33405842702236e-05	4.35444274247613
GO.1902580	D	0.0140806854063551	-2.45519839480554		GO.1902582	D	1.33405842702236e-05	4.35444274247613
GO.1902582	D	0.0140806854063551	-2.45519839480554		GO.0000166	D	1.33405842702236e-05	4.35444274247613
GO.0071702	Dc	0.0034466311511322	-4.12999068576768		GO.0044422	Dc	1.02861956187424e-05	4.77852358852849
GO.0016604	Dc	0.0034466311511322	-4.08508047977006		GO.0034622	Dc	1.09005778060526e-08	6.1656923793042
GO.0000166	Dc	0.0034466311511322	-4.05866310234487		GO.0005759	Dc	1.29825045328059e-06	5.29404643990857
GO.1901265	Dc	0.0034466311511322	-4.01609810090717		GO.0043227	Dc	1.29825045328059e-06	5.28960381856909
GO.0046907	Dc	0.0226337158467859	-3.48181004925513		GO.0022613	Dc	1.37533577413127e-09	6.54177046393023
GO.0019900	Dc	0.0226337158467859	-3.37679781490452		GO.0006614	Dc	1.37533577413127e-09	6.53192420564619
GO.0017076	Dc	0.0226337158467859	-3.3410528717113		GO.0003697	Dc	1.57626591489678e-05	4.68690422973886
GO.0043066	Dc	0.0226337158467859	-3.30012267023556		GO.0051704	Dc	1.80996004716603e-05	4.65355603133932
GO.0030554	Dc	0.0226337158467859	-3.27631443887697		GO.0030054	Dc	1.84939978393616e-05	4.64425515733038
GO.0032550	Dc	0.0226337158467859	-3.24609041767788		GO.0016032	Dc	1.92863626725377e-05	4.63082819436455
GO.0032555	Dc	0.0226337158467859	-3.24609041767788		GO.0044712	Dc	2.06655652354403e-06	5.19565995091138
GO.0032553	Dc	0.0226337158467859	-3.24335622845627		GO.0043066	Dc	2.23356703456394e-10	6.94315254051616
GO.0097367	Dc	0.0226337158467859	-3.22429659056773		GO.0009056	Dc	2.29915630722087e-07	5.65277058061714
GO.0035639	Dc	0.0234506648135989	-3.18074758034477		GO.0005874	Dc	2.7777033437028e-06	5.13237064124866
GO.0036094	Dc	0.0234506648135989	-3.17281258469868		GO.0071840	Dc	2.78870310392835e-05	4.54862079773437
GO.0005524	Dc	0.0265634243301159	-3.11747117940967		GO.0043226	Dc	2.78870310392835e-05	4.54453774656927
GO.0071705	Dc	0.0307028461579548	-3.05640001027296		GO.0016043	Dc	2.81365826359317e-05	4.53812655698101
GO.0060548	Dc	0.0336565664237764	-2.98652801119254		GO.0022607	Dc	2.93596997540872e-06	5.10274229461986
GO.0031625	Dc	0.0336565664237764	-2.97169115412976		GO.0006415	Dc	2.93596997540872e-06	5.09906215557891
GO.0003723	Dc	0.0336565664237764	-2.9693487502423		GO.0006413	Dc	2.93596997540872e-06	5.09640662506474
GO.0032774	Dc	0.0336565664237764	-2.96433035685946		GO.0044391	Dc	2.93596997540872e-06	5.09279645155034
GO.0010467	Dc	0.0413210473745875	-2.8771167185004		GO.0008152	Dc	3.05798023309571e-05	4.51607279015314
GO.0044822	Dc	0.0413210473745875	-2.87199442168677		GO.1901360	Dc	3.12643940109986e-06	5.0591746214611
GO.0010608	Dc	0.0416568323382695	-2.85498332244832		GO.0006725	Dc	3.12643940109986e-06	5.05546852040507
GO.0044271	Dc	0.0416568323382695	-2.84296361938511		GO.0046483	Dc	3.12643940109986e-06	5.05546852040507
GO.0006414	Dc	0.0421305508240145	-2.81241218303099		GO.0006139	Dc	3.12643940109986e-06	5.0554477240868
GO.0055114	Dc	0.0421305508240145	-2.80390229827059		GO.0071704	Dc	3.23595371316964e-06	5.04299090603188
GO.0006366	Dc	0.0421305508240145	-2.79486928366537		GO.0044445	Dc	3.66219582843388e-09	6.37033891708543
GO.0090304	Dc	0.0421305508240145	-2.79092926041865		GO.0019080	Dc	3.72344083148168e-10	6.78206742392888
GO.1901362	Dc	0.0421305508240145	-2.76309873339787		GO.0019083	Dc	3.72344083148168e-10	6.78206742392888
GO.0034654	Dc	0.0421305508240145	-2.74865009890294		GO.0022626	Dc	3.72344083148168e-10	6.78069068305315
GO.0018130	Dc	0.0421305508240145	-2.74671066426484		GO.0000184	Dc	3.72344083148168e-10	6.77105861502599
GO.0019438	Dc	0.0421305508240145	-2.74671066426484		GO.0044248	Dc	3.75076502157399e-05	4.46820485493677
GO.0006351	Dc	0.0421305508240145	-2.73065470029233		GO.0005515	Dc	4.20301529662839e-06	4.98697640017058
GO.0044802	Dc	0.0421305508240145	-2.72505233958708		GO.0034641	Dc	4.35250596759112e-06	4.97460448872252
GO.0044451	Dc	0.0421305508240145	-2.72095098135636		GO.0005829	Dc	4.42153524552078e-09	6.32903753564989
GO.0033365	Dc	0.0438718692293505	-2.69713308267135		GO.1901575	Dc	4.46403450324424e-11	7.35453739684202
GO.0005829	Dc	0.0438718692293505	-2.68953945652253		GO.0016604	Dc	4.52268151024255e-07	5.52473618924191
GO.0006139	Dc	0.045058852216883	-2.6536174057654		GO.0044085	Dc	4.59271042512856e-05	4.4203174380651
GO.0006725	Dc	0.045058852216883	-2.65134926880903		GO.0005925	Dc	4.61991751829909e-05	4.41475883652085
GO.0046483	Dc	0.045058852216883	-2.65134926880903		GO.0005912	Dc	4.71685588146841e-05	4.40605779565238
GO.1901360	Dc	0.045058852216883	-2.64694748395539		GO.0065003	Dc	4.84117115551914e-09	6.30355984499263
GO.0006732	Dc	0.0483556773207748	-2.59766850182027		GO.0010821	Dc	5.11562365429311e-06	4.93772379602837
GO.0030054	Dc	0.0483556773207748	-2.59606215460121		GO.0060548	Dc	5.16995504852157e-11	7.24149272749497
GO.0006413	Dc	0.0483556773207748	-2.5886794357186		GO.0005840	Dc	5.33802301766039e-07	5.48546660410879
GO.0016070	Dc	0.0483556773207748	-2.58598007470766		GO.0051084	Dc	6.01908345248173e-06	4.90052270144982
GO.0006417	Dc	0.0483556773207748	-2.58442507535753		GO.0097159	Dc	6.15133811028698e-05	4.33987590465924
GO.0051704	Dc	0.0498699880180061	-2.56436138852517		GO.1901363	Dc	6.15133811028698e-05	4.33987590465924
GO.0043227	Dc	0.0498699880180061	-2.55864171999037		GO.0003723	Dc	6.24654143722925e-06	4.88798184068744
GO.0080135	Dc	0.0498699880180061	-2.55229084596831		GO.0071705	Dc	6.30121972838961e-05	4.33054426897839
GO.0006518	Dc	0.0500024061421948	-2.54445846670102		GO.0043933	Dc	7.20373097480626e-06	4.85468629162577
GO.0006415	Dc	0.0503481559621507	-2.53525660420111		GO.0044238	Dc	7.41983610431467e-05	4.28831975065763
GO.0034248	Dc	0.0519083701702204	-2.51784630091767		GO.0005622	Dc	7.41983610431467e-05	4.28262683752841
GO.0072524	Dc	0.0524996716474368	-2.50615986512349		GO.0044424	Dc	7.41983610431467e-05	4.28262683752841
GO.0046496	Dc	0.0524996716474368	-2.49485551935741		GO.0000956	Dc	7.58927045065749e-11	7.13368625456197
GO.0000956	Dc	0.0524996716474368	-2.49100707832337		GO.0044237	Dc	8.50465844034515e-05	4.24648887657163
GO.0033036	Dc	0.0524996716474368	-2.48426937524954		GO.0044822	Dc	8.50465844034515e-05	4.24457912614458
GO.0000184	Dc	0.0524996716474368	-2.48189472704898		GO.0090304	Dc	8.70924100437122e-05	4.2355330404218
GO.0044391	Dc	0.0526939724473017	-2.47447786463566		GO.0071822	Dc	9.45640378753702e-07	5.37294766554282
GO.0043209	Dc	0.0526986493707575	-2.46843663289547		GO.0003676	Dc	9.45640378753702e-07	5.3645064754778
GO.0019222	Dc	0.0545022713482842	-2.45042332230909		GO.0033365	Dc	9.75095384987081e-10	6.61298513627587
GO.0003676	Dc	0.0555350311819978	-2.43082173785404		GO.0006732	Dc	9.77098006604586e-05	4.20593902840018
GO.0019080	Dc	0.0555350311819978	-2.42628567292983		GO.0006461	Dc	9.93104050220405e-05	4.19507281231934
GO.0019083	Dc	0.0555350311819978	-2.42628567292983		GO.0070271	Dc	9.93104050220405e-05	4.19507281231934
GO.0022626	Dc	0.0608104877746054	-2.38748057645313		GO.0003735	Dc	9.98731695533947e-05	4.19027535441721
GO.0005198	Dc	0.0614787132816664	-2.36686248815923		GO.0051179	Dc	0.00010546201756101	4.1744295732627
GO.0071704	Dc	0.0614787132816664	-2.36349453310554		GO.0070013	Dc	0.000105657006224083	4.16878340484014
GO.0031988	Dc	0.0614787132816664	-2.36156420130507		GO.0006810	Dc	0.000105657006224083	4.16405975295539
GO.0031982	Dc	0.0614787132816664	-2.36139875313365		GO.0051234	Dc	0.000105657006224083	4.15919306496144
GO.0005912	Dc	0.0620670945585691	-2.35251841181043		GO.0031974	Dc	0.000105657006224083	4.15795148226962
GO.0042981	Dc	0.0624185505537668	-2.34513394858183		GO.0043231	Dc	0.000105657006224083	4.15735100698719
GO.0010821	Dc	0.0625404318892382	-2.33918620546299		GO.0051649	Dc	0.00011563311028016	4.13347370140665
GO.0005925	Dc	0.0646992594490443	-2.32130138707807		GO.0043233	Dc	0.000118323119753281	4.12501417755623
GO.0044446	Dc	0.0698827883188958	-2.28702209229208		GO.0051641	Dc	0.000118941597839213	4.1206808359471
GO.0044421	Dc	0.0721442403356692	-2.26737285651197		GO.0016482	Dc	0.000126454027258237	4.102346576363
GO.0061024	Dc	0.0721442403356692	-2.26211556316521		GO.0019058	Dc	0.000126454027258237	4.10038235974691
GO.0080090	Dc	0.0721442403356692	-2.25717130624899		GO.0033036	Dc	0.000126814039428784	4.09669801531119
GO.0060255	Dc	0.0721442403356692	-2.25036619471753		GO.0000228	Dc	0.000136701399682657	4.07627598510794
GO.0008152	Dc	0.0721442403356692	-2.24762741959927		GO.0009987	Dc	0.000145047287076511	4.0594942299944
GO.1901566	Dc	0.0721442403356692	-2.24496227289073		GO.0003729	Dc	0.000189802563212191	3.9932701013257
GO.0006412	Dc	0.0724264266608019	-2.23580897787059		GO.0034613	Dc	0.000211366664708749	3.96472893051247
GO.0005576	Dc	0.0724264266608019	-2.23390797541011		GO.0032991	Dc	0.000230348966841274	3.94122358173464
GO.0044248	Dc	0.0729306910502691	-2.22597429525019		GO.0043234	Dc	0.000235787891099973	3.93271124403663
GO.0044711	Dc	0.0729306910502691	-2.2168989897659		GO.0010467	Dc	0.000263763536736404	3.9027886865272
GO.0008104	Dc	0.0729306910502691	-2.21329081717192		GO.0006913	Dc	0.000288566483623658	3.87811019567769
GO.0070062	Dc	0.0729306910502691	-2.21269581437545		GO.0006605	Dc	0.000293769330890596	3.86882235028443
GO.0044237	Dc	0.0751146325840251	-2.19662702409497		GO.1902580	Dc	0.000293769330890596	3.86809108367448
GO.0043226	Dc	0.0759799066468363	-2.18248348163182		GO.0010468	Dc	0.000313127572940899	3.84969960654722
GO.0044260	Dc	0.0759799066468363	-2.1801156803563		GO.0044265	Dc	0.000320941999720911	3.84088492004708
GO.0003735	Dc	0.0759799066468363	-2.17877399384714		GO.0044429	Dc	0.000327266302817792	3.83334614553345
GO.0006461	Dc	0.0776454333180536	-2.1614799684996		GO.0072594	Dc	0.000328538513249839	3.82967362492406
GO.0070271	Dc	0.0776454333180536	-2.1614799684996		GO.0080135	Dc	0.000337041477643075	3.82068644803412
GO.0009056	Dc	0.078809651522605	-2.15125329087706		GO.0043229	Dc	0.000370264822263147	3.79123744953176
GO.0043005	Dc	0.0831104825554071	-2.12227561553892		GO.0070062	Dc	0.000370264822263147	3.78882252938066
GO.0034613	Dc	0.0831104825554071	-2.12142268093867		GO.0044421	Dc	0.000370264822263147	3.78864129955907
GO.0006614	Dc	0.086080417252544	-2.10299038848601		GO.0070972	Dc	0.000370264822263147	3.78687228112474
GO.0005622	Dc	0.0870830378906313	-2.08989536009565		GO.0044765	Dc	0.000384745764706172	3.77474234331559
GO.0044424	Dc	0.0870830378906313	-2.08989536009565		GO.0005576	Dc	0.000412058594796273	3.75504230982082
GO.0006091	Dc	0.0871526597451704	-2.08133659512348		GO.0006886	Dc	0.000425732782486077	3.74301796896298
GO.0044238	Dc	0.0871526597451704	-2.08132055452848		GO.0043566	Dc	0.000425732782486077	3.74178482723235
GO.0071840	Dc	0.0901666067421285	-2.06328987328865		GO.0006325	Dc	0.000524513950156669	3.68649442974763
GO.0031974	Dc	0.0921293763609041	-2.05033947522525		GO.0005615	Dc	0.000602336259723267	3.64858984960079
GO.0016043	Dc	0.0928573485480893	-2.04303950627985		GO.0097367	Dc	0.000651780549803865	3.62574805638575
GO.0044765	Dc	0.0944944677872266	-2.02304508724065		GO.0008104	Dc	0.00076031534333042	3.58323254902839
GO.0010556	Dc	0.0944944677872266	-2.02157567820954		GO.0031966	Dc	0.000936084291626514	3.5260291339648
GO.0044422	Dc	0.0944944677872266	-2.02101170843545		GO.1901566	Dc	0.00103562855726918	3.49664728822943
GO.0034641	Dc	0.0944944677872266	-2.01989331206042		GO.0044711	Dc	0.00110315561700456	3.47724252112264
GO.0003729	Dc	0.0961055276951278	-2.00890916110718		GO.0071702	Dc	0.00126802958319504	3.43720240745937
GO.0019058	Dc	0.0966003034636705	-2.00287506697933		GO.0031982	Dc	0.0012704324083044	3.43175014320796
GO.0043233	Dc	0.096991032474306	-1.99732621092528		GO.0031988	Dc	0.0012704324083044	3.4317161509081
GO.0010468	Dc	0.099018849909102	-1.98475200121414		GO.0032550	Dc	0.00133049357454072	3.41214003059719
GO.0003674	Dc	0.100773701193931	-1.97119868680966		GO.0032555	Dc	0.00133049357454072	3.41214003059719
GO.0051649	Dc	0.100773701193931	-1.96969721337475		GO.0017076	Dc	0.00133049357454072	3.41039248397741
GO.0051641	Dc	0.104737906121135	-1.94942110808695		GO.0032553	Dc	0.00133049357454072	3.40943700340602
GO.0070013	Dc	0.105296875625607	-1.94337752356485		GO.0006414	Dc	0.00136549975645665	3.39995919194584
GO.0044249	Dc	0.105508737965628	-1.93878145357739		GO.0035639	Dc	0.00139570864057537	3.39159951732689
GO.0006950	Dc	0.105628225218259	-1.93458874206369		GO.0003674	Dc	0.00165552671001523	3.33843399395654
GO.0006367	Dc	0.108164757105806	-1.92062724211765		GO.0015031	Dc	0.00165552671001523	3.33775526513655
GO.0005840	Dc	0.109621190400407	-1.90791669559333		GO.0045184	Dc	0.00165552671001523	3.33744435126746
GO.0044712	Dc	0.109621190400407	-1.90748922178822		GO.0006457	Dc	0.00170311351920527	3.32722981952162
GO.0005694	Dc	0.110309656557027	-1.90112782138956		GO.0030554	Dc	0.0019087608539307	3.29299995437384
GO.0043234	Dc	0.11241989456036	-1.88848495997865		GO.0044802	Dc	0.00199447770607254	3.27830665006367
GO.0016032	Dc	0.11241989456036	-1.88562041307967		GO.0036094	Dc	0.0023598397981724	3.22819222026794
GO.0006402	Dc	0.113372935083335	-1.87833163874439		GO.0031625	Dc	0.00261855641722282	3.19598024988856
GO.0010638	Dc	0.113381243366734	-1.87434307764871		GO.0044451	Dc	0.00269649372237498	3.18518463364693
GO.0065003	Dc	0.113381243366734	-1.86696225769152		GO.0005634	Dc	0.00334543221092995	3.11990107629842
GO.0006401	Dc	0.113381243366734	-1.86477377209109		GO.0034655	Dc	0.00345391962242233	3.10815256580282
GO.0005634	Dc	0.113381243366734	-1.86424938121269		GO.0044446	Dc	0.00351739304823588	3.10044487764416
GO.0005737	Dc	0.124338835686032	-1.81946868441		GO.0006412	Dc	0.00388019905761977	3.06893062558801
GO.0043231	Dc	0.133962087527041	-1.78159731670215		GO.0010556	Dc	0.00402262212612473	3.05583043464358
GO.0005615	Dc	0.133962087527041	-1.77852457044198		GO.0005524	Dc	0.00451544399933262	3.01868708081663
GO.0051179	Dc	0.133974152423128	-1.77499011227976		GO.0005743	Dc	0.00465406142179635	3.00720307107645
GO.1901575	Dc	0.135304630608815	-1.76696569455927		GO.0043065	Dc	0.00481055078031579	2.99483462977636
GO.0006810	Dc	0.140123289739684	-1.74607126787144		GO.0031967	Dc	0.00486375148335068	2.98919025634506
GO.0034645	Dc	0.140123289739684	-1.74107436613046		GO.0006401	Dc	0.00505490834012607	2.9751126687792
GO.0051234	Dc	0.140123289739684	-1.74040059401921		GO.0003677	Dc	0.00522554910185865	2.962642499834
GO.0071013	Dc	0.141084952683977	-1.73378898869956		GO.0046496	Dc	0.0052638166291738	2.95813814849174
GO.0043232	Dc	0.145650523434217	-1.71060668116483		GO.0072524	Dc	0.00532280647416797	2.95245663316793
GO.0044085	Dc	0.145650523434217	-1.70998404183948		GO.0000785	Dc	0.00577431462177659	2.92498188070646
GO.0097159	Dc	0.145650523434217	-1.69768129706058		GO.0019900	Dc	0.00586969572804984	2.91624854130672
GO.1901363	Dc	0.145650523434217	-1.69729609682272		GO.0044297	Dc	0.00586969572804984	2.91457920065422
GO.0003677	Dc	0.145650523434217	-1.69344040129712		GO.0006996	Dc	0.00586969572804984	2.9132187226443
GO.0032991	Dc	0.145650523434217	-1.69332649955942		GO.0043005	Dc	0.0059055664271296	2.90912265206119
GO.0009058	Dc	0.145650523434217	-1.69221273965716		GO.0006402	Dc	0.00622895708658799	2.89022548659614
GO.0022607	Dc	0.145650523434217	-1.68882488319248		GO.0006950	Dc	0.00638040785689664	2.88048487085398
GO.0010941	Dc	0.145650523434217	-1.68875707354504		GO.0005488	Dc	0.00641146145929957	2.87678577952125
GO.0044444	Dc	0.149864015162397	-1.6718728369606		GO.0005694	Dc	0.00657703937621402	2.86657009241511
GO.1901576	Dc	0.150619382016968	-1.66620597076099		GO.0044430	Dc	0.0067311211125443	2.85708138823183
GO.0043933	Dc	0.150867871502347	-1.65650791824706		GO.0005737	Dc	0.00694110831434362	2.84517273610378
GO.0005515	Dc	0.150867871502347	-1.65607034947313		GO.0044444	Dc	0.0072664805987521	2.82840955129176
GO.0034655	Dc	0.150867871502347	-1.65556128104121		GO.0044427	Dc	0.00840519337600614	2.77932840143599
GO.0034622	Dc	0.150867871502347	-1.65256099255408		GO.0046907	Dc	0.00886436870936259	2.75985149725003
GO.0006396	Dc	0.153280734922875	1.63630803767615		GO.0019866	Dc	0.0121344922672623	2.65341672244793
GO.0042802	Dc	0.153280734922875	-1.63304184618704		GO.0019538	Dc	0.0127607378504807	2.63417760618121
GO.0071822	Dc	0.153280734922875	-1.63294797694965		GO.0005740	Dc	0.0135405148507996	2.61176409369295
GO.0000785	Dc	0.153280734922875	-1.63033760284884		GO.0005654	Dc	0.0137368162619721	2.60463635331262
GO.0051084	Dc	0.153280734922875	-1.62913905402584		GO.0015630	Dc	0.0138627284752652	2.59927329353263
GO.0044427	Dc	0.165927865039372	-1.58697808535843		GO.0044267	Dc	0.0138627284752652	2.59713573566772
GO.0005488	Dc	0.167156210791205	-1.58016985979721		GO.0042802	Dc	0.0140728976414343	2.5897920054569
GO.0005730	Dc	0.174810968694366	-1.55338214642089		GO.0019899	Dc	0.0177974200014943	2.50568616347559
GO.0019899	Dc	0.174810968694366	-1.55145731693849		GO.0019901	Dc	0.0184238875117955	2.49121602211392
GO.0009987	Dc	0.183504933893704	-1.52368618783335		GO.0006091	Dc	0.0187006709570561	2.48370948866812
GO.0003697	Dc	0.186256047571062	-1.51292270003509		GO.0000398	Dc	0.0201846217569151	2.45418141733316
GO.0043229	Dc	0.201630314043139	-1.4686783611098		GO.0044454	Dc	0.0211518316665468	2.43249692652885
GO.0000375	Dc	0.211155364471438	-1.44119138021118		GO.0005730	Dc	0.0211518316665468	2.43239386037612
GO.0015630	Dc	0.217788489398131	-1.4215304259633		GO.0009058	Dc	0.0211518316665468	2.43006050047929
GO.0044297	Dc	0.227888507748901	-1.39393776714685		GO.0044249	Dc	0.0211518316665468	2.42852629569922
GO.0019538	Dc	0.233303437507172	-1.37794980069782		GO.0010608	Dc	0.0281949162555346	2.31978463980783
GO.0044267	Dc	0.234134997717288	-1.37277199746343		GO.0005856	Dc	0.0281949162555346	2.31798033366952
GO.1902580	Dc	0.236944345512918	-1.36301479250579		GO.0044428	Dc	0.0288138189791325	2.30757191554046
GO.0006605	Dc	0.239026180295929	-1.3546885120729		GO.0042981	Dc	0.0295232820870735	2.29615008434127
GO.0044430	Dc	0.239026180295929	-1.35177122875882		GO.1901576	Dc	0.0299285990904759	2.28876147872325
GO.1902582	Dc	0.244214891448365	-1.33668054030967		GO.0009163	Dc	0.031341520207188	2.26896026273952
GO.0000398	Dc	0.269619014508788	-1.27772505271447		GO.0031981	Dc	0.0332678932623862	2.24382233965915
GO.0072594	Dc	0.288761236131491	-1.23486498538944		GO.0010638	Dc	0.0334009561862435	2.24006728419289
GO.0031966	Dc	0.296523081871816	-1.21600478174178		GO.1902582	Dc	0.0347032938945651	2.22303193146532
GO.0000228	Dc	0.296908987466062	-1.21190463561365		GO.0015629	Dc	0.0388027102175386	2.17705134181466
GO.0005743	Dc	0.300548316737477	-1.20138102009949		GO.0019222	Dc	0.0418630457356766	2.1446453819523
GO.0005856	Dc	0.307254375219942	-1.18492979276132		GO.0032774	Dc	0.0471822451148743	2.09414231939427
GO.0043065	Dc	0.311655014228079	-1.17308048799458		GO.0006518	Dc	0.0506636413244348	2.06271942001692
GO.0019866	Dc	0.316166057547313	-1.16108977538063		GO.0016070	Dc	0.0514544200306838	2.05404816576201
GO.0044454	Dc	0.32587576008894	-1.13937511410956		GO.0051082	Dc	0.0553093588127856	2.0217419419062
GO.0009892	Dc	0.341914488295707	-1.10642576090291		GO.0009205	Dc	0.0625445388846186	-1.96752285222565
GO.0006325	Dc	0.352778824008755	-1.08349383476754		GO.0030529	Dc	0.0629611947976522	-1.96236135606871
GO.0015629	Dc	0.355338233472426	-1.07553447195262		GO.0009141	Dc	0.0644739753186997	-1.94986859631155
GO.0045184	Dc	0.363857194485718	-1.05555199404296		GO.0009167	Dc	0.0648169603389663	-1.945271631741
GO.0006996	Dc	0.363857194485718	-1.05369467671118		GO.0043232	Dc	0.0648819282502457	1.94253290453915
GO.0015031	Dc	0.365562138645424	-1.04730266172193		GO.0009123	Dc	0.0654414406722972	-1.93653233842309
GO.0005654	Dc	0.387789160842437	-1.00570272972083		GO.1901362	Dc	0.070198403336316	1.90375536225479
GO.0006913	Dc	0.431172746157102	-0.931490119091778		GO.0034654	Dc	0.0717571276678141	1.88740671124404
GO.0006886	Dc	0.460966487619888	-0.88182062554321		GO.0018130	Dc	0.0717571276678141	1.88722300774626
GO.0044265	Dc	0.468685511058871	-0.866505606215113		GO.0019438	Dc	0.0717571276678141	1.88722300774626
GO.0016071	Dc	0.485852885054854	0.831598186661241		GO.0044271	Dc	0.0718234052636547	1.88453084259573
GO.0005759	Dc	0.485852885054854	0.831517232352747		GO.0006351	Dc	0.0737523564651964	1.87054956062921
GO.0048519	Dc	0.485852885054854	-0.829865070682135		GO.0006366	Dc	0.0775631584053135	1.84585423715099
GO.0044445	Dc	0.493622590980095	-0.814713767350192		GO.0046128	Dc	0.0809190231486877	-1.82156143203879
GO.0006397	Dc	0.497465739034922	0.802218776111177		GO.0000166	Dc	0.0809190231486877	1.82089374312524
GO.0005874	Dc	0.497465739034922	-0.801678205923447		GO.1901265	Dc	0.0809190231486877	1.81996848014639
GO.0019901	Dc	0.508040561476068	-0.782525360360211		GO.0009116	Dc	0.0820603052439048	-1.81135549715507
GO.0016482	Dc	0.543791738101688	-0.727737934497889		GO.0010941	Dc	0.0828957490537466	1.80448601620278
GO.0010629	Dc	0.553199175358209	-0.710775568004113		GO.0006417	Dc	0.0905197976908828	1.76188994297786
GO.0022411	Dc	0.574625728937627	-0.677366608835323		GO.0005739	Dc	0.0987310202456407	1.71910566522365
GO.0031967	Dc	0.593773816968168	-0.647478581006328		GO.0060255	Dc	0.0990909468382147	1.71506966154108
GO.0008380	Dc	0.594884775795925	0.642045989238256		GO.0080090	Dc	0.103872195068995	1.69043953885841
GO.1901135	Dc	0.606438045776401	-0.62257876260401		GO.0044260	Dc	0.106233788471872	1.67738358949262
GO.0009163	Dc	0.619393716885902	-0.601332601799716		GO.0034645	Dc	0.110967847360522	1.65409155232741
GO.0044429	Dc	0.629649046530627	0.583751103793141		GO.0034248	Dc	0.117138853218836	1.6254459823905
GO.0005740	Dc	0.632663572364793	-0.575754377323661		GO.0005198	Dc	0.117947211221921	1.61972235869567
GO.0055086	Dc	0.644316909218011	-0.556382349758159		GO.0061024	Dc	0.129340597635461	1.57170940090033
GO.0043566	Dc	0.651371466468231	-0.543082508071217		GO.0000375	Dc	0.129933865529514	1.56702958803151
GO.0006457	Dc	0.67491541257338	-0.508376266444311		GO.0009150	Dc	0.133030924119368	-1.55280359191987
GO.0005681	Dc	0.68795253090444	0.487437639143886		GO.0055114	Dc	0.143390292493279	1.51226404527339
GO.0005739	Dc	0.689759260835165	-0.480949406243542		GO.0043209	Dc	0.14683622588014	1.49761903634022
GO.0019637	Dc	0.741578507705948	-0.410535739372488		GO.0006367	Dc	0.158132404536759	1.45656140671117
GO.0022613	Dc	0.741578507705948	-0.406617174872857		GO.0072521	Dc	0.166569779452715	-1.42657745024038
GO.0006753	Dc	0.748547299163483	-0.393524326760121		GO.0048519	Dc	0.226653006489601	1.25324628049895
GO.0043624	Dc	0.79716694693951	-0.328642567977683		GO.0071013	Dc	0.342852700787575	0.995878531169467
GO.0019693	Dc	0.824128170021733	-0.290972033676072		GO.0009892	Dc	0.466527206659257	0.778128493822636
GO.1901564	Dc	0.831479753293109	-0.277339285850324		GO.0006397	Dc	0.55346572794671	0.639364763924501
GO.0030529	Dc	0.840936728300434	-0.26109725081851		GO.0008380	Dc	0.55346572794671	0.639364763924501
GO.0051082	Dc	0.865673519447109	-0.226143933519245		GO.0010629	Dc	0.640930165522608	0.513043508228362
GO.0009117	Dc	0.869893130022243	-0.216208518201709		GO.0005681	Dc	0.656789263705862	-0.487672201057211
GO.0072521	Dc	0.870474004538427	0.210708674627774		GO.0055086	Dc	0.724969966892666	0.393628446545623
GO.0009205	Dc	0.89342638998344	0.177753766809018		GO.0043624	Dc	0.725338422983953	0.388939286937041
GO.0009150	Dc	0.924026213914838	0.135394475308815		GO.0016071	Dc	0.808260011460714	0.278656309544316
GO.0009167	Dc	0.945298788895747	-0.104340354427649		GO.0006396	Dc	0.811063396260114	-0.270602614456574
GO.0046128	Dc	0.950704931424586	0.0880469767429594		GO.0019637	Dc	0.85734138461618	-0.207955230403115
GO.0009123	Dc	0.950704931424586	-0.0874629451029569		GO.0009117	Dc	0.907899461849731	0.13121620705097
GO.0009116	Dc	0.957421091567798	0.070515320387407		GO.0006753	Dc	0.907899461849731	0.131093496942215
GO.0044428	Dc	0.957421091567798	0.0688691419012108		GO.0019693	Dc	0.907899461849731	0.130450810276871
GO.0070972	Dc	0.958376862372278	0.0625178449308327		GO.0022411	Dc	0.922712058001802	-0.106996466704726
GO.0031981	Dc	0.982983808698062	-0.0251876529518207		GO.1901564	Dc	0.976037711066345	0.0352897356304798
GO.0009141	Dc	0.982983808698062	-0.0213282500280348		GO.1901135	Dc	0.99213326469692	-0.00985965031475183
GO.0060548	Df	0.12613853048337	-3.45237428452038		GO.0010941	Df	1.28015283447266e-05	4.93271207139868
GO.0010608	Df	0.154925405587291	-3.11971189333773		GO.0044451	Df	1.29711130608947e-06	5.44153457665679
GO.1902582	Df	0.154925405587291	-2.99791819930419		GO.0044267	Df	1.40715474851374e-14	8.2760352436903
GO.1901575	Df	0.154925405587291	-2.93342419098883		GO.0019538	Df	1.70594925725849e-11	7.29051645246672
GO.0031625	Df	0.154925405587291	-2.92791311791813		GO.0015630	Df	1.82358713046021e-11	7.25137020735824
GO.0071702	Df	0.20585358750764	-2.75547497290493		GO.0097367	Df	1.85663647986502e-07	5.8201140376707
GO.0005739	Df	0.20585358750764	-2.72924730012778		GO.0016604	Df	2.22292356538073e-06	5.32566424985785
GO.0006605	Df	0.248800047258106	-2.62095888478588		GO.0016043	Df	2.62781448043275e-05	4.77273062375252
GO.0010941	Df	0.263289809928608	-2.38785432942079		GO.0005737	Df	2.62781448043275e-05	4.76351547610286
GO.0019899	Df	0.263289809928608	-2.33041957477851		GO.0006457	Df	3.0447704245999e-11	7.1566648678215
GO.0051084	Df	0.263289809928608	2.32353786405693		GO.0071705	Df	3.17707266233406e-05	4.70492799781188
GO.0009056	Df	0.263289809928608	-2.29620049924001		GO.0043227	Df	3.17707266233406e-05	4.70109814314073
GO.1902580	Df	0.263289809928608	-2.2913260264761		GO.0005874	Df	3.69370959071298e-27	11.2787327731811
GO.0072594	Df	0.263289809928608	-2.27719638854934		GO.0060255	Df	3.80755247394303e-05	4.64474473150765
GO.0042981	Df	0.263289809928608	-2.2712477427179		GO.0042981	Df	3.80755247394303e-05	4.63191932697623
GO.0044451	Df	0.263289809928608	-2.2526183741255		GO.0005622	Df	3.80755247394303e-05	4.62256041412773
GO.0016604	Df	0.263289809928608	-2.20652129443975		GO.0044424	Df	3.80755247394303e-05	4.62256041412773
GO.0044248	Df	0.263289809928608	-2.205031814956		GO.0031974	Df	4.13029767981943e-05	4.59640152474438
GO.0016070	Df	0.263289809928608	-2.20065678700411		GO.0043229	Df	4.67532506231314e-07	5.64081967515434
GO.0009987	Df	0.263289809928608	-2.19746409940114		GO.0009056	Df	5.72576964610135e-05	4.51026638872268
GO.1901566	Df	0.263289809928608	-2.15503175353396		GO.0019222	Df	5.72576964610135e-05	4.51018488461849
GO.0005737	Df	0.263289809928608	-2.15048369307003		GO.0070013	Df	6.43415226006651e-06	5.10787840435744
GO.1901362	Df	0.263289809928608	-2.14471717168508		GO.0043233	Df	6.43415226006651e-06	5.09466105233861
GO.0060255	Df	0.263289809928608	-2.14127795788051		GO.0000166	Df	6.85952404883761e-05	4.46331763978702
GO.0097367	Df	0.263289809928608	-2.13016046171516		GO.0036094	Df	7.14655476613195e-06	5.0594871640207
GO.0065003	Df	0.263289809928608	-2.1292903336843		GO.0043226	Df	8.07655178098098e-05	4.41251826056417
GO.0018130	Df	0.263289809928608	-2.11910136122942		GO.1901265	Df	8.07655178098098e-05	4.41219613011021
GO.0019438	Df	0.263289809928608	-2.11910136122942		GO.0044248	Df	8.44271926988367e-13	7.72190138740081
GO.0034654	Df	0.263289809928608	-2.11558931256255		GO.0043231	Df	0.000113668270716567	4.32992894936716
GO.0044265	Df	0.263289809928608	-2.09266861266333		GO.0044260	Df	0.000142330449969809	4.27259781324869
GO.0005515	Df	0.263289809928608	-2.08999056081679		GO.0080090	Df	0.000162617216457494	4.23543902413089
GO.0031974	Df	0.263289809928608	-2.06372541164624		GO.0005739	Df	0.000165735767461517	4.2240231417893
GO.0070013	Df	0.263289809928608	-2.05339829597269		GO.0030054	Df	0.000239631998156342	4.13315224242076
GO.0005840	Df	0.263289809928608	-2.03854335497742		GO.0019899	Df	0.000250554719023008	4.11602124022616
GO.0043226	Df	0.263289809928608	-2.01797127555359		GO.0031981	Df	0.000314182626845112	4.05676345662063
GO.0032774	Df	0.263289809928608	-1.99713811554895		GO.0044446	Df	0.000432469196215513	3.96968875484168
GO.0044271	Df	0.263289809928608	-1.98530255664621		GO.0005515	Df	0.000432469196215513	3.96824345833778
GO.0006415	Df	0.263289809928608	-1.98383115351149		GO.0071840	Df	0.000452118935011985	3.95126277590825
GO.0043233	Df	0.263289809928608	-1.97443764936744		GO.0017076	Df	0.000455729848546954	3.94313630883345
GO.0080090	Df	0.263289809928608	-1.96739014892957		GO.0009987	Df	0.000455822978913651	3.9370137056676
GO.0006413	Df	0.263289809928608	-1.95396023102879		GO.0044765	Df	0.00051246276297305	3.90283561006794
GO.0043066	Df	0.263289809928608	-1.95161226696072		GO.0044444	Df	0.000655865011912762	3.8368076355953
GO.0019222	Df	0.263289809928608	-1.93720709044656		GO.0044422	Df	0.00110849417348329	3.69990538545616
GO.0045184	Df	0.263289809928608	-1.90974073570501		GO.0005694	Df	0.001111658258546	3.69334248147825
GO.0006412	Df	0.263289809928608	-1.90836085561188		GO.0032550	Df	0.00128624482255311	3.64467955753611
GO.0015031	Df	0.263289809928608	-1.90432278667606		GO.0032555	Df	0.00128624482255311	3.64467955753611
GO.0044391	Df	0.263289809928608	-1.90431674114935		GO.0005912	Df	0.00148244578628688	3.59884755103519
GO.0016032	Df	0.263289809928608	1.90152573752844		GO.0005925	Df	0.00148244578628688	3.59694286213828
GO.0043065	Df	0.263289809928608	-1.89820659917699		GO.0032553	Df	0.00151915240916627	3.58519561331635
GO.0017076	Df	0.263289809928608	-1.88980959460488		GO.0005743	Df	0.00152573403148667	3.57878999807914
GO.0036094	Df	0.263289809928608	-1.88100067199609		GO.0060548	Df	0.0016746139288431	3.54916873066376
GO.0044444	Df	0.263289809928608	-1.86412172617608		GO.0008152	Df	0.00169320817592178	3.54114013132891
GO.0034655	Df	0.263289809928608	-1.84166698861746		GO.0035639	Df	0.00173212070866033	3.53010456129332
GO.0030554	Df	0.263289809928608	-1.82582986754981		GO.0044238	Df	0.00176476741256789	3.5202069916764
GO.0000184	Df	0.263289809928608	-1.81834904506214		GO.0005488	Df	0.00189657574002306	3.4961640127924
GO.0006886	Df	0.263289809928608	-1.81282621266954		GO.0005740	Df	0.00217306687162172	3.45482927486934
GO.0032550	Df	0.263289809928608	-1.80714241220034		GO.0005654	Df	0.00282602131429077	3.37847774247734
GO.0032555	Df	0.263289809928608	-1.80714241220034		GO.1901575	Df	0.00289883330597034	3.36668339135132
GO.0044802	Df	0.263289809928608	-1.80557195938999		GO.0043066	Df	0.00314749739013783	3.339173016723
GO.0019080	Df	0.263289809928608	-1.80420442794793		GO.0044427	Df	0.00314823104105684	3.33443675207672
GO.0019083	Df	0.263289809928608	-1.80420442794793		GO.0003676	Df	0.00325229777600773	3.32077055054627
GO.0006366	Df	0.263289809928608	-1.79910977804161		GO.0019866	Df	0.0045845956285054	3.21904652573665
GO.0043227	Df	0.263289809928608	-1.78275866855809		GO.0005856	Df	0.00470757388247496	3.20274857283022
GO.0032553	Df	0.263289809928608	-1.77805058744554		GO.0006996	Df	0.00470757388247496	3.20231479464827
GO.0006351	Df	0.263289809928608	-1.77351595405024		GO.0043065	Df	0.00547337924680968	3.15412205537549
GO.0022626	Df	0.263289809928608	-1.77001769246836		GO.0071704	Df	0.00581492022893415	3.13193511209922
GO.0006414	Df	0.263289809928608	-1.76412409104379		GO.0097159	Df	0.00635379689176596	3.09698245753953
GO.0046907	Df	0.265040117482799	-1.747458349407		GO.1901363	Df	0.00635379689176596	3.09698245753953
GO.0044085	Df	0.265040117482799	-1.74455812208932		GO.0043566	Df	0.0072236005023499	3.05437067589616
GO.0006518	Df	0.265040117482799	-1.74073276204268		GO.0005634	Df	0.00738270911899314	3.04350254225638
GO.0034645	Df	0.270954002792246	-1.72122789843853		GO.0044421	Df	0.00754336090054087	3.03274128761017
GO.0000956	Df	0.270954002792246	-1.71720699616033		GO.0022607	Df	0.00756669322844824	3.02758459730455
GO.0044454	Df	0.274755283964739	-1.70412666432218		GO.0031966	Df	0.00910267977753996	2.96704520008332
GO.0019058	Df	0.275243053451592	-1.68860738585463		GO.0044237	Df	0.00914601559591454	2.96139723229265
GO.0043229	Df	0.275243053451592	-1.68391100067938		GO.0000956	Df	0.0101877329821873	2.92015849313144
GO.0006402	Df	0.275243053451592	-1.68138050452291		GO.0043232	Df	0.0101877329821873	2.91971878201345
GO.0080135	Df	0.275243053451592	-1.66777344704147		GO.0005576	Df	0.0144637307027291	2.80450443799904
GO.0003735	Df	0.275243053451592	-1.66472313819831		GO.0000785	Df	0.0146540455594205	2.79612019971493
GO.0044260	Df	0.275243053451592	-1.66039678139711		GO.0044428	Df	0.0165546346854419	2.75210218681541
GO.0005622	Df	0.275243053451592	-1.64912720390319		GO.0031988	Df	0.0165546346854419	2.7481844890205
GO.0044424	Df	0.275243053451592	-1.64912720390319		GO.0031982	Df	0.016753540597207	2.74018623642216
GO.0019900	Df	0.275243053451592	1.64763786189788		GO.0044430	Df	0.0214273498095197	2.65416816572267
GO.0006401	Df	0.279502438364383	-1.6342949821515		GO.0044265	Df	0.0242267651510095	2.60832170248771
GO.0034622	Df	0.31066274506701	-1.57629036429968		GO.0044712	Df	0.0245133912426707	2.60018663808695
GO.0005524	Df	0.311451943766659	-1.56432183769992		GO.0070062	Df	0.0263244950571274	2.57109684860349
GO.0035639	Df	0.311451943766659	-1.56324487169306		GO.0006401	Df	0.0263244950571274	2.56748503321389
GO.0009892	Df	0.320847755738772	-1.53765034114889		GO.0071013	Df	0.0282016251569766	2.53947187150815
GO.0044238	Df	0.320847755738772	-1.52856515193281		GO.0003674	Df	0.0336257128573621	2.47323986701773
GO.0061024	Df	0.320847755738772	-1.52711346190102		GO.0032991	Df	0.0362816390766934	2.44187615926279
GO.0016482	Df	0.320847755738772	-1.52520344620841		GO.0019058	Df	0.0424944332066365	2.38015354999396
GO.0043231	Df	0.321347251998345	-1.51876354089973		GO.0003677	Df	0.0434972494384959	2.36746049337117
GO.0022411	Df	0.323137370226356	-1.51031461877043		GO.0030554	Df	0.0441852584885486	2.35371278924607
GO.0010468	Df	0.354813429747727	-1.45610320260862		GO.0006402	Df	0.0441852584885486	2.35357619805479
GO.0000228	Df	0.36553619664592	-1.43471821384066		GO.0005759	Df	0.0474225864905319	2.32237771420041
GO.0044446	Df	0.37770779293954	-1.40912302522671		GO.0043209	Df	0.0474225864905319	2.31918006828346
GO.0044422	Df	0.37770779293954	-1.3984680855789		GO.0006414	Df	0.0572375871713533	2.2435186856683
GO.0000398	Df	0.37770779293954	-1.39489375438195		GO.0034655	Df	0.0575044122795564	2.23771734888909
GO.0016071	Df	0.37770779293954	-1.39484271019411		GO.0065003	Df	0.0577051678948716	2.23239728675696
GO.0044249	Df	0.382006075176103	-1.38320581096745		GO.0044802	Df	0.0672469719731688	2.16845336523798
GO.0006396	Df	0.383215490611629	-1.37601368405798		GO.1901564	Df	0.0737255074638641	2.12772418930082
GO.0008152	Df	0.388531525987803	-1.36303698357131		GO.0030529	Df	0.0743805162963352	2.11686275848812
GO.0005198	Df	0.389780022706561	-1.3558608490708		GO.0005615	Df	0.0743805162963352	2.11618038202533
GO.0016043	Df	0.391845277242806	-1.34087219309809		GO.0043933	Df	0.0896281455641692	-2.03578057714371
GO.0006417	Df	0.391845277242806	-1.33981965762777		GO.0006614	Df	0.0905136733150476	2.0276628488663
GO.0051704	Df	0.391845277242806	1.33691612068516		GO.0034622	Df	0.0927140999610803	2.01361771097142
GO.0006732	Df	0.407052762652103	-1.30916846238745		GO.0016032	Df	0.0927923736997596	-2.00928658859136
GO.0071840	Df	0.407052762652103	-1.30506508794573		GO.0044711	Df	0.0997454017969724	1.97478085494832
GO.0034248	Df	0.41063243061627	-1.29486451548368		GO.0043234	Df	0.112706911244528	1.91825653693715
GO.0071704	Df	0.412335427479012	-1.28728874953926		GO.0048519	Df	0.119901661779404	1.88717331153317
GO.0008380	Df	0.418090447894611	-1.27322711709853		GO.0003697	Df	0.131360728010487	1.84169731952291
GO.0006397	Df	0.418090447894611	-1.26868469886404		GO.0071822	Df	0.131360728010487	-1.83857609344791
GO.0000375	Df	0.418090447894611	-1.26385378615156		GO.0006732	Df	0.144523369513065	1.79131592138792
GO.0010556	Df	0.439410401200444	-1.22429453284137		GO.0033036	Df	0.157317922820265	1.74814700203014
GO.0019901	Df	0.439410401200444	1.21595288427625		GO.0071702	Df	0.162147060314191	1.72993734543999
GO.0006614	Df	0.439410401200444	-1.21240224696618		GO.1901362	Df	0.165930363099926	1.71379170199101
GO.0044237	Df	0.439410401200444	-1.20757312520983		GO.0051704	Df	0.165930363099926	-1.69802712106535
GO.0006367	Df	0.439410401200444	-1.20468487071802		GO.0019080	Df	0.165930363099926	1.6977972243178
GO.0022607	Df	0.439410401200444	-1.20444926740124		GO.0019083	Df	0.165930363099926	1.6977972243178
GO.0044267	Df	0.459618620799128	-1.17262693199607		GO.0022626	Df	0.165930363099926	1.69723745750331
GO.0090304	Df	0.463182481309547	-1.16293919094919		GO.0000184	Df	0.165930363099926	1.69488133105567
GO.1901576	Df	0.47229813611188	-1.1461003518937		GO.0046496	Df	0.175512089721835	1.66408795108121
GO.0019538	Df	0.474359474938539	-1.13162229330578		GO.0072524	Df	0.180770318287011	1.64586401340814
GO.0071822	Df	0.474359474938539	1.12999587245719		GO.0022613	Df	0.191490497360351	1.61377536834271
GO.0071013	Df	0.474359474938539	-1.12847001030559		GO.0034654	Df	0.1992645300471	1.58255437856716
GO.0071705	Df	0.476617534123587	-1.12060839671308		GO.0018130	Df	0.1992645300471	1.58218286185919
GO.0005743	Df	0.504591206373623	-1.08013636004029		GO.0019438	Df	0.1992645300471	1.58218286185919
GO.0005759	Df	0.513192535054284	1.06104776882062		GO.1901576	Df	0.205691598915774	1.5623614444878
GO.0042802	Df	0.513192535054284	-1.05948866555546		GO.0044271	Df	0.208489469566784	1.55161621102599
GO.0019866	Df	0.51529363974186	-1.05192912459319		GO.0000228	Df	0.226355376691658	1.50367949957338
GO.0022613	Df	0.52593072661743	-1.03387670147399		GO.0019901	Df	0.226355376691658	1.50179437460747
GO.0031966	Df	0.530190997463521	-1.02371638484619		GO.0005524	Df	0.245538279691437	1.45544785915481
GO.0009058	Df	0.532265627650774	-1.0162480293588		GO.0009892	Df	0.248355741855468	1.44542275325745
GO.0005740	Df	0.549103870243039	-0.985871092408421		GO.0070972	Df	0.248624298556369	1.44085879920084
GO.0044711	Df	0.549103870243039	-0.984013985530339		GO.0006950	Df	0.255040293358813	1.42333241008422
GO.0070972	Df	0.549103870243039	0.981067268032688		GO.0051179	Df	0.265394163561495	1.39594053117934
GO.0048519	Df	0.552996576655468	-0.971477154103885		GO.0016482	Df	0.265394163561495	1.39399377229141
GO.0044429	Df	0.566843444701273	0.95001672783314		GO.0051084	Df	0.285251767670084	-1.35057915675633
GO.0005681	Df	0.568384858650726	-0.943279552779289		GO.0019637	Df	0.289846901277858	1.33771189245568
GO.0005576	Df	0.577433493412176	-0.927662582216568		GO.0044249	Df	0.295659060829121	1.32263283646188
GO.0000166	Df	0.581674826842816	-0.917764476093916		GO.0072521	Df	0.306234081471092	1.29885282846295
GO.0044428	Df	0.584893799304051	-0.898112103376352		GO.0055086	Df	0.310641741514022	1.28598924422511
GO.0006725	Df	0.584893799304051	-0.891166962868051		GO.0010468	Df	0.310641741514022	1.28168730596867
GO.0046483	Df	0.584893799304051	-0.891166962868051		GO.0031625	Df	0.310641741514022	1.27869784234529
GO.1901360	Df	0.584893799304051	-0.885935570875619		GO.0032774	Df	0.357716117934635	1.1900507844834
GO.0006139	Df	0.584893799304051	-0.879795136497006		GO.0033365	Df	0.357716117934635	1.18824750762489
GO.0051179	Df	0.584893799304051	-0.874714553133633		GO.0044454	Df	0.357716117934635	1.18423703574176
GO.0003729	Df	0.584893799304051	-0.871723115133564		GO.0006810	Df	0.376468954392584	1.14935051442975
GO.0072524	Df	0.584893799304051	-0.870747250150669		GO.0051234	Df	0.385667032478179	1.13047825811855
GO.1901265	Df	0.584893799304051	-0.870701653707666		GO.0031967	Df	0.399460378067521	1.10374710703051
GO.0043624	Df	0.602585891380501	-0.844868059245215		GO.0005840	Df	0.399460378067521	1.09694825184127
GO.0044421	Df	0.612879735048414	-0.827971712980146		GO.0044445	Df	0.399460378067521	1.09632981440568
GO.0031982	Df	0.616361337134173	-0.819120400709123		GO.0010556	Df	0.409934005517833	1.07595907363401
GO.0031988	Df	0.621803035433269	-0.807982382032332		GO.0034613	Df	0.410088670547773	1.07158262439368
GO.0006810	Df	0.628846144613466	-0.794428433245592		GO.0019693	Df	0.461103854598545	0.991764972407349
GO.0005634	Df	0.628846144613466	-0.790238772336111		GO.0009117	Df	0.468130430783664	0.977489703636067
GO.0070062	Df	0.642427351782652	-0.769676312615159		GO.0006753	Df	0.468549862387004	0.962849005190638
GO.0032991	Df	0.645750911983544	-0.757762735024561		GO.0006415	Df	0.468549862387004	0.957352749196729
GO.0046496	Df	0.645750911983544	-0.755267962295076		GO.0044391	Df	0.468549862387004	0.956671666018556
GO.0015630	Df	0.645750911983544	-0.746774843150806		GO.0006413	Df	0.468549862387004	0.956101008908159
GO.0043232	Df	0.645750911983544	-0.745159486149466		GO.0010608	Df	0.468549862387004	0.955704358613502
GO.0051234	Df	0.645750911983544	-0.742144904618243		GO.0008104	Df	0.468660087886619	0.951359218542149
GO.0043209	Df	0.646399667563128	-0.736695980507421		GO.0044085	Df	0.484132675656314	0.918425852086289
GO.0006457	Df	0.660755293752785	-0.715236283623808		GO.0009150	Df	0.484132675656314	0.917838474906045
GO.0019637	Df	0.707742468062443	-0.656782855472219		GO.1901135	Df	0.484132675656314	0.916764847077102
GO.0005654	Df	0.716812012096578	-0.641757331808643		GO.0034645	Df	0.490805843284037	0.903164206094532
GO.0010629	Df	0.746592677061098	-0.603815292586345		GO.0003735	Df	0.522807377970527	0.854736670765693
GO.0044445	Df	0.752848812578154	-0.591989025969179		GO.0055114	Df	0.540764107927618	-0.826303935718241
GO.0009163	Df	0.758428961726416	-0.574827918479052		GO.0051082	Df	0.542560574403234	0.819599887941925
GO.0006950	Df	0.758428961726416	-0.57385906334207		GO.0016070	Df	0.559970104193958	0.79078391065793
GO.0044430	Df	0.758428961726416	-0.571019466813		GO.0016071	Df	0.559970104193958	0.787915329232696
GO.0006913	Df	0.771642556918963	-0.551513963096358		GO.1901360	Df	0.564093156337911	0.778167505850413
GO.0005694	Df	0.772938026618196	-0.545132643021921		GO.0006367	Df	0.5693626106858	-0.76692881254666
GO.0005488	Df	0.774590486911992	-0.53836270234634		GO.0019900	Df	0.574759413963518	0.755540418670508
GO.1901564	Df	0.779279034648161	-0.528239915745471		GO.0009058	Df	0.576462451795677	0.748984803581962
GO.0044765	Df	0.780314496762256	-0.517253132466141		GO.0006518	Df	0.593785264504587	-0.711698256871936
GO.0030054	Df	0.780314496762256	-0.515882439599967		GO.0006139	Df	0.593785264504587	0.71019063335565
GO.0031967	Df	0.780314496762256	-0.512302869996798		GO.0006725	Df	0.593785264504587	0.709116176910138
GO.0051082	Df	0.783802933575614	-0.501856062341687		GO.0046483	Df	0.593785264504587	0.709116176910138
GO.0006091	Df	0.783802933575614	-0.498594801231304		GO.0044297	Df	0.593886893526163	0.704660544026004
GO.0003674	Df	0.785404921181145	-0.491902822026411		GO.0046128	Df	0.615387069182879	0.672571029972976
GO.0030529	Df	0.786678141338076	-0.480147909149253		GO.0042802	Df	0.623798793821854	0.657446229064199
GO.0031981	Df	0.786678141338076	-0.471304612655182		GO.0009116	Df	0.62456494572301	0.645739751583117
GO.0097159	Df	0.786678141338076	-0.469920129230262		GO.0006605	Df	0.62456494572301	0.643345754051437
GO.1901363	Df	0.786678141338076	-0.467650525706292		GO.1902580	Df	0.62456494572301	0.643345754051437
GO.0005925	Df	0.786678141338076	-0.466125938896255		GO.0006366	Df	0.62713644601674	0.635690034703836
GO.0005874	Df	0.797364644107788	-0.44911702244783		GO.0006351	Df	0.694571559772397	0.546719378121249
GO.0005912	Df	0.801214922210964	-0.439869432670504		GO.0090304	Df	0.70004718553841	-0.535437133259631
GO.0043933	Df	0.808066415806045	0.427197308025105		GO.0003729	Df	0.714358891891852	0.504099854444824
GO.0034641	Df	0.843984045180284	-0.381281441409135		GO.0006396	Df	0.714358891891852	0.50296416681525
GO.0000785	Df	0.843984045180284	-0.376670667654183		GO.0010467	Df	0.714358891891852	-0.500628405111132
GO.0010467	Df	0.852758180156917	-0.356628379819205		GO.0072594	Df	0.714358891891852	0.499556922272625
GO.0005615	Df	0.852758180156917	-0.351635410755984		GO.1902582	Df	0.736519132958931	0.467878015457819
GO.0009116	Df	0.852758180156917	-0.349457148404725		GO.0046907	Df	0.788055366077266	0.401283721310218
GO.0003697	Df	0.852758180156917	-0.346736975211417		GO.0006886	Df	0.79279757317589	0.38871202613916
GO.0044712	Df	0.858871173134261	-0.334772345947178		GO.0061024	Df	0.79279757317589	-0.385958680476247
GO.0003676	Df	0.864989325404029	0.322778456231805		GO.0000398	Df	0.814635014666246	0.349887576726131
GO.0033036	Df	0.881833713552951	-0.29853900209493		GO.0006397	Df	0.814635014666246	0.345319757247693
GO.0005730	Df	0.884881471936542	0.289975553073864		GO.0008380	Df	0.814635014666246	0.345319757247693
GO.0046128	Df	0.885865452921534	-0.28375817970017		GO.0006412	Df	0.831760435037005	-0.320009995031865
GO.0043234	Df	0.923149546177792	0.234422921199214		GO.0005829	Df	0.83984229904773	-0.305430520427249
GO.0044822	Df	0.923149546177792	-0.222556634909958		GO.0022411	Df	0.886841178842566	-0.24483517284379
GO.0003723	Df	0.923149546177792	-0.220507379210652		GO.0009205	Df	0.89593451634254	0.228949107324878
GO.0043566	Df	0.923149546177792	-0.217073815333788		GO.0003723	Df	0.904839473078695	0.207161399665084
GO.0055086	Df	0.923149546177792	0.215195922116584		GO.0009167	Df	0.904839473078695	0.199068388327208
GO.0009123	Df	0.9276869039401	-0.204735321854819		GO.0009141	Df	0.904839473078695	0.194036454250915
GO.0009167	Df	0.931341343972722	-0.195269449315523		GO.0005681	Df	0.904839473078695	-0.193283521420198
GO.0034613	Df	0.934435932483692	0.186431011004369		GO.0009123	Df	0.904839473078695	0.19168212780587
GO.0019693	Df	0.939477596739154	0.168175104542384		GO.0034641	Df	0.904839473078695	0.187059959410659
GO.0009205	Df	0.939477596739154	0.161238783361699		GO.0051641	Df	0.939153780668656	0.135582184959157
GO.0005829	Df	0.939477596739154	0.156051495913822		GO.0051649	Df	0.939153780668656	0.135257141342393
GO.0006461	Df	0.939477596739154	-0.149093139024733		GO.0010629	Df	0.94277547503748	-0.125514872898155
GO.0070271	Df	0.939477596739154	-0.149093139024733		GO.0015031	Df	0.942817416979124	0.114738203480972
GO.1901135	Df	0.939477596739154	0.149022033136268		GO.0045184	Df	0.942817416979124	0.114693230606629
GO.0033365	Df	0.952578352905198	-0.126729204939845		GO.0005198	Df	0.944691851822027	-0.107024572754986
GO.0009141	Df	0.952578352905198	-0.116871760550048		GO.0006091	Df	0.960177164843287	0.0775611753834477
GO.0009117	Df	0.952578352905198	0.113644164296181		GO.0044429	Df	0.960177164843287	0.0772135033780741
GO.0009150	Df	0.952578352905198	0.112263415216396		GO.0044822	Df	0.965790039220322	-0.0648295963643544
GO.0003677	Df	0.955483171544585	0.0972760749150657		GO.0000375	Df	0.967257846805972	-0.0575241741644127
GO.0006996	Df	0.955483171544585	0.0951704162821781		GO.1901566	Df	0.987057136290455	-0.0230828692081037
GO.0055114	Df	0.955483171544585	-0.0899178111210318		GO.0043624	Df	0.987057136290455	0.0166730623801
GO.0072521	Df	0.955483171544585	-0.087557843136728		GO.0080135	Df	0.987057136290455	-0.0162221855396107
GO.0006753	Df	0.960551113257245	-0.0760320500338987		GO.0005730	Df	NA	NA
GO.0051649	Df	0.969390179708665	-0.0598081751239329		GO.0006325	Df	NA	NA
GO.0005856	Df	0.970728999260303	-0.0525068899148676		GO.0006417	Df	NA	NA
GO.0044427	Df	0.970728999260303	-0.0428304759682896		GO.0006461	Df	NA	NA
GO.0008104	Df	0.970728999260303	0.0420577511379627		GO.0006913	Df	NA	NA
GO.0051641	Df	0.994208942987269	-0.00725807734909307		GO.0009163	Df	NA	NA
GO.0006325	Df	NA	NA		GO.0010638	Df	NA	NA
GO.0010638	Df	NA	NA		GO.0010821	Df	NA	NA
GO.0010821	Df	NA	NA		GO.0015629	Df	NA	NA
GO.0015629	Df	NA	NA		GO.0034248	Df	NA	NA
GO.0043005	Df	NA	NA		GO.0043005	Df	NA	NA
GO.0044297	Df	NA	NA		GO.0070271	Df	NA	NA
GO.0061024	Dn	0.0306679603844252	-3.17926095095195		GO.0071705	Dn	1.00219987294389e-05	4.86212073293658
GO.0043624	Dn	0.0306679603844252	-3.12845871437372		GO.0072521	Dn	1.02602499562952e-05	4.85026096865037
GO.0009117	Dn	0.0306679603844252	-3.1209842807888		GO.0005198	Dn	1.10646360677429e-05	4.82828435495311
GO.0072521	Dn	0.0306679603844252	-3.11795682955951		GO.0009117	Dn	1.3670153837489e-05	4.76860588443415
GO.0009116	Dn	0.0306679603844252	-3.11481057153738		GO.0019693	Dn	1.3670153837489e-05	4.76632810998766
GO.0005681	Dn	0.0306679603844252	-3.11048781763733		GO.0006753	Dn	1.3670153837489e-05	4.76618744971551
GO.0055086	Dn	0.0306679603844252	-3.10615176345945		GO.0019637	Dn	1.38986709392593e-05	4.75663344763325
GO.0009150	Dn	0.0306679603844252	-3.09852810292723		GO.0034248	Dn	1.40981184050402e-07	5.95369762827376
GO.0019693	Dn	0.0306679603844252	-3.09449415259547		GO.0010608	Dn	1.40981184050402e-07	5.93021692353582
GO.0046128	Dn	0.0306679603844252	-3.09381727341088		GO.0006417	Dn	1.47366838425361e-07	5.86513860488778
GO.0022411	Dn	0.0306679603844252	-3.08472394720325		GO.0006091	Dn	1.47366838425361e-07	5.84631261678378
GO.0009205	Dn	0.0306679603844252	-3.08388016904071		GO.0072524	Dn	1.47366838425361e-07	5.82905147956368
GO.0006753	Dn	0.0306679603844252	-3.08145756274525		GO.0046496	Dn	1.47366838425361e-07	5.82555586598116
GO.0009123	Dn	0.0306679603844252	-3.06619139391445		GO.0006414	Dn	1.47726928182101e-05	4.73825429886187
GO.1901135	Dn	0.0306679603844252	-3.06497226196017		GO.0010821	Dn	1.6543884122406e-05	4.70934568532138
GO.0009141	Dn	0.0306679603844252	-3.05970096318238		GO.0055086	Dn	1.75566485330621e-05	4.69146059443348
GO.0009167	Dn	0.0306679603844252	-3.04597287414504		GO.1901566	Dn	3.29143433297273e-05	4.55547467782237
GO.1902582	Dn	0.0306679603844252	-3.03956526212562		GO.0044711	Dn	3.37358618513802e-07	5.66762655561185
GO.0019637	Dn	0.0310317169095198	-3.01967227482059		GO.0019058	Dn	3.81313208582668e-05	4.51880914649163
GO.0044428	Dn	0.0431080466508565	-2.90264471942553		GO.0006518	Dn	4.04949894310547e-06	5.14100495641637
GO.0031981	Dn	0.0549065719857837	-2.81035676926464		GO.0005730	Dn	4.04949894310547e-06	5.13772989317343
GO.0009892	Dn	0.0556157398334902	-2.70119472183357		GO.0009205	Dn	4.06968302817339e-06	5.12538544282102
GO.0006396	Dn	0.0556157398334902	-2.69629183966535		GO.0009167	Dn	4.39408897145365e-06	5.08211025915768
GO.0043232	Dn	0.0556157398334902	-2.67462176990852		GO.0009123	Dn	4.39408897145365e-06	5.08150078148319
GO.0008380	Dn	0.0556157398334902	-2.66012059171554		GO.0009141	Dn	4.39408897145365e-06	5.08013083211915
GO.0006397	Dn	0.0556157398334902	-2.65477934597102		GO.0005654	Dn	4.82387986066285e-07	5.58949050561681
GO.0005654	Dn	0.0556157398334902	-2.6443961295212		GO.0006732	Dn	4.91973087704582e-07	5.57093441886767
GO.0000375	Dn	0.0556157398334902	-2.64145768995611		GO.0031981	Dn	4.98648237301935e-07	5.55462036221491
GO.0000398	Dn	0.0556157398334902	-2.63044272015786		GO.0046128	Dn	5.20829116819009e-06	5.02997869038925
GO.0016071	Dn	0.0556157398334902	-2.60645326517338		GO.0009116	Dn	5.20829116819009e-06	5.02949630345745
GO.0006351	Dn	0.0556157398334902	-2.57578539699642		GO.0006402	Dn	5.35281050442028e-05	4.43995366584883
GO.0010629	Dn	0.0556157398334902	-2.5690586472305		GO.0005737	Dn	5.35281050442028e-05	4.43541814932048
GO.0044271	Dn	0.0556157398334902	-2.54680602378107		GO.0044445	Dn	5.4749488225647e-05	4.42522839247233
GO.0071705	Dn	0.0556157398334902	-2.5149675998116		GO.0018130	Dn	5.83964725323565e-05	4.39637888799605
GO.0034248	Dn	0.0556157398334902	-2.51276241820024		GO.0019438	Dn	5.83964725323565e-05	4.39637888799605
GO.0009163	Dn	0.0556157398334902	-2.51203557262972		GO.0034654	Dn	5.83964725323565e-05	4.39597505162662
GO.0030529	Dn	0.0556157398334902	-2.51200388900676		GO.0006401	Dn	5.91707542216152e-05	4.38626163993339
GO.0044802	Dn	0.0556157398334902	-2.50863633571215		GO.1901362	Dn	5.91707542216152e-05	4.38344379422987
GO.0006417	Dn	0.0556157398334902	-2.49907738531186		GO.0048519	Dn	6.03167621871979e-06	4.99270276787108
GO.0071013	Dn	0.0556157398334902	-2.49306314014043		GO.0044428	Dn	6.05792665574443e-08	6.14894695801533
GO.0005198	Dn	0.0556157398334902	-2.4873204623943		GO.0043232	Dn	6.55590850817489e-10	6.9867287582973
GO.0006996	Dn	0.0556157398334902	-2.48068162662253		GO.0072594	Dn	6.59991726343407e-05	4.3493980798106
GO.0006518	Dn	0.0556157398334902	-2.47524721658167		GO.1902580	Dn	6.59991726343407e-05	4.34554255921354
GO.0034641	Dn	0.0556157398334902	-2.46505973476794		GO.0006950	Dn	6.59991726343407e-05	4.34082194313744
GO.0032774	Dn	0.0556157398334902	-2.46310402603682		GO.0006605	Dn	6.59991726343407e-05	4.34038432229806
GO.0034654	Dn	0.0556157398334902	-2.45325306550584		GO.0006351	Dn	6.59991726343407e-05	4.33585927428348
GO.0018130	Dn	0.0556157398334902	-2.44791314028302		GO.0060255	Dn	6.59991726343407e-05	4.3326962107344
GO.0019438	Dn	0.0556157398334902	-2.44791314028302		GO.0010629	Dn	6.68460755979278e-05	4.32569265849551
GO.0010821	Dn	0.0556157398334902	-2.44722162445247		GO.0016070	Dn	6.90928053355429e-05	4.31427261860425
GO.0044711	Dn	0.0556157398334902	-2.44388436057721		GO.1901135	Dn	6.95076179937033e-06	4.95698410961953
GO.0055114	Dn	0.0556157398334902	-2.43404693941848		GO.0009150	Dn	7.9398800773879e-06	4.92308174087095
GO.0005730	Dn	0.0556157398334902	-2.43232792507502		GO.0006367	Dn	8.4198613002446e-05	4.2662880994713
GO.0003735	Dn	0.0556157398334902	-2.43223387670773		GO.0044271	Dn	8.62286366873237e-05	4.25693908616054
GO.0010608	Dn	0.0556157398334902	-2.42149927301139		GO.0032774	Dn	8.87553523524957e-05	4.24151599275931
GO.0046907	Dn	0.0556157398334902	-2.42064179823825		GO.0044237	Dn	8.87553523524957e-05	4.23769846270145
GO.1901362	Dn	0.0556157398334902	-2.4088268555942		GO.0031974	Dn	8.87553523524957e-05	4.2349213132602
GO.0006614	Dn	0.0556157398334902	-2.40026750958007		GO.0044249	Dn	8.87553523524957e-05	4.23154925539609
GO.0016070	Dn	0.0556157398334902	-2.38703320807046		GO.1901564	Dn	8.87553523524957e-05	4.23128135489863
GO.0006412	Dn	0.0556157398334902	-2.3820436003167		GO.0071013	Dn	9.05237219637489e-06	4.88965356265801
GO.0006091	Dn	0.0556157398334902	-2.36691058955376		GO.0005634	Dn	9.4601971812001e-07	5.42845998436576
GO.0006401	Dn	0.0556157398334902	-2.36352835668736		GO.0055114	Dn	9.75767818291523e-09	6.49369380854913
GO.1901566	Dn	0.0556157398334902	-2.36211437031886		GO.0080090	Dn	0.000131701533026128	4.13573727055058
GO.0044445	Dn	0.0556157398334902	-2.36012429201118		GO.0006412	Dn	0.000131701533026128	4.1325157691184
GO.0006402	Dn	0.0556157398334902	-2.35894944747243		GO.0034645	Dn	0.000131701533026128	4.13063963388387
GO.0005874	Dn	0.0556157398334902	-2.35292792331571		GO.0044802	Dn	0.000134777892146458	4.12175937082836
GO.0006139	Dn	0.0556157398334902	-2.3477474359675		GO.0003735	Dn	0.000153561761925659	4.08806738525557
GO.0006732	Dn	0.0556157398334902	-2.34511226801888		GO.0019222	Dn	0.000162042539300292	4.0720762304156
GO.0046496	Dn	0.0556157398334902	-2.34399232820034		GO.0034655	Dn	0.000179400570013587	4.04484726045705
GO.0034655	Dn	0.0556157398334902	-2.34225334807579		GO.0019901	Dn	0.000267536996692398	3.94672431347038
GO.0072524	Dn	0.0556157398334902	-2.34174533670752		GO.0006996	Dn	0.000283396519195565	3.92944941294385
GO.0005840	Dn	0.0556157398334902	-2.34121860289425		GO.0006366	Dn	0.000290039418467634	3.92045726003354
GO.0000956	Dn	0.0556157398334902	-2.33728453548642		GO.0031967	Dn	0.000301194925508473	3.90797454334494
GO.0006725	Dn	0.0556157398334902	-2.33648659334395		GO.0009163	Dn	0.000303435543383697	3.90284703452482
GO.0046483	Dn	0.0556157398334902	-2.33648659334395		GO.0006413	Dn	0.000308835358600915	3.88989830828125
GO.0043234	Dn	0.0556157398334902	-2.33643246731744		GO.0009892	Dn	0.000308835358600915	3.88650988080595
GO.0006950	Dn	0.0556157398334902	-2.33534567391353		GO.0006415	Dn	0.000308835358600915	3.88617676408698
GO.0022626	Dn	0.0556157398334902	-2.32978262823241		GO.0009058	Dn	0.000308835358600915	3.8843993024977
GO.0044391	Dn	0.0556157398334902	-2.32511678528191		GO.0044391	Dn	0.000308835358600915	3.88243384781002
GO.0019080	Dn	0.0556157398334902	-2.32212731807919		GO.0010556	Dn	0.000308835358600915	3.87940469460841
GO.0019083	Dn	0.0556157398334902	-2.32212731807919		GO.1901576	Dn	0.000313777112311009	3.86952916613303
GO.0019058	Dn	0.0556157398334902	-2.31979061803947		GO.0016604	Dn	0.000313777112311009	3.86944962947296
GO.0048519	Dn	0.0556157398334902	-2.31952163465904		GO.0044422	Dn	0.000315924910327677	3.86291986905822
GO.1901360	Dn	0.0556157398334902	-2.31927497485221		GO.0032991	Dn	0.000315924910327677	3.86183237278323
GO.0006415	Dn	0.0556157398334902	-2.31763572210001		GO.0010638	Dn	0.000321875321127097	3.85434285313324
GO.0006413	Dn	0.0556157398334902	-2.31686237313697		GO.0005840	Dn	0.000323060001487504	3.8505465905647
GO.0000184	Dn	0.0556157398334902	-2.31564037572904		GO.0010941	Dn	0.000329035185573404	3.84195311744131
GO.0090304	Dn	0.0556157398334902	-2.31220494112086		GO.0042802	Dn	0.000329035185573404	3.83783538311934
GO.0006414	Dn	0.0581161160481526	-2.29124176945673		GO.0044238	Dn	0.000329035185573404	3.83754434213254
GO.0072594	Dn	0.0607381920924785	-2.26648647180918		GO.0003677	Dn	0.000332436209784705	3.83223941675093
GO.0044249	Dn	0.0607381920924785	-2.2651988195877		GO.0043233	Dn	0.0003425040514613	3.82214155914902
GO.0034645	Dn	0.0607381920924785	-2.26160557639263		GO.0019900	Dn	0.000352013978876678	3.81265518328888
GO.0032991	Dn	0.0643881577509964	-2.23483839010675		GO.0044712	Dn	0.000363789904697394	3.8017913898664
GO.1902580	Dn	0.0643881577509964	-2.23071528818203		GO.0043005	Dn	0.000363789904697394	3.79913208287549
GO.0006605	Dn	0.0644799933188521	-2.22601184742448		GO.0090304	Dn	0.000381290663936206	3.78481102914324
GO.0005634	Dn	0.0670814028399438	-2.20647460291515		GO.0019538	Dn	0.000384297979520958	3.78022290264822
GO.1901564	Dn	0.0685120790158844	-2.1941009537491		GO.0010467	Dn	0.000417161494146369	3.75712348031888
GO.0010638	Dn	0.0702753600596613	-2.18001613199134		GO.0044267	Dn	0.000443302832158073	3.72548620489331
GO.0009058	Dn	0.0730490511213058	-2.16062273689191		GO.0070013	Dn	0.000443302832158073	3.72402624050094
GO.0071840	Dn	0.0771310996653812	-2.13486007374121		GO.0000184	Dn	0.000443302832158073	3.72353237405242
GO.0016043	Dn	0.0813597536603805	-2.10424794676572		GO.0006614	Dn	0.000443302832158073	3.72260330525356
GO.0009987	Dn	0.0813597536603805	-2.10225445579622		GO.0005874	Dn	0.000443302832158073	3.72242563653954
GO.1901576	Dn	0.0813597536603805	-2.10127633143731		GO.0005576	Dn	0.000443302832158073	3.72138155564673
GO.0070062	Dn	0.0857694540237773	-2.07576974107982		GO.0019080	Dn	0.000443302832158073	3.7202329520831
GO.0044451	Dn	0.0902161557434474	-2.05098758943676		GO.0019083	Dn	0.000443302832158073	3.7202329520831
GO.0031988	Dn	0.0908843535614491	-2.0439704311423		GO.0044822	Dn	0.000443302832158073	3.71908381341011
GO.0031982	Dn	0.091420340877258	-2.03759582752563		GO.0022626	Dn	0.000443302832158073	3.71690999299156
GO.0044422	Dn	0.0915361348005472	-2.03316448927114		GO.0036094	Dn	0.000454968570918985	3.70796192059271
GO.0044421	Dn	0.0947502850718453	-2.01486699475949		GO.0000956	Dn	0.000458459735460435	3.70366727758391
GO.0016604	Dn	0.0951305574196536	-2.00932067846853		GO.0042981	Dn	0.000481759006153833	3.6887345102557
GO.0022607	Dn	0.0952158871794355	-2.00205373221884		GO.0005829	Dn	0.000494171455127249	3.67992798588663
GO.0005622	Dn	0.0952158871794355	-1.99751736358941		GO.0070062	Dn	0.000496866917628631	3.6762313895221
GO.0044424	Dn	0.0952158871794355	-1.99751736358941		GO.0080135	Dn	0.000524054068191129	3.65999979538004
GO.0005576	Dn	0.102359639530641	-1.9622441363996		GO.1901265	Dn	0.000524054068191129	3.6580363805773
GO.0034622	Dn	0.102359639530641	-1.95615806069776		GO.0000166	Dn	0.000525666934979396	3.65498874147445
GO.0044085	Dn	0.102359639530641	-1.95552740355501		GO.0019899	Dn	0.000577311168865464	3.62792073590845
GO.0010556	Dn	0.105453509955879	-1.93900721277852		GO.0003723	Dn	0.000577311168865464	3.62638501217856
GO.0031974	Dn	0.1095881935818	-1.91864509380051		GO.0022411	Dn	0.000611107179742739	3.60797873499401
GO.0043566	Dn	0.112816483602173	-1.90228023532705		GO.0071704	Dn	0.000611107179742739	3.60722627150183
GO.0006461	Dn	0.113160891243552	-1.89358371069262		GO.0043231	Dn	0.000628207676060873	3.59786159653041
GO.0070271	Dn	0.113160891243552	-1.89358371069262		GO.0030529	Dn	0.000653841373543626	3.58526016859427
GO.0065003	Dn	0.1134708311237	-1.88873823733175		GO.0000375	Dn	0.000722741050121227	3.55684949366894
GO.0003697	Dn	0.115752233298556	-1.87634103663775		GO.0043566	Dn	0.000739173696873086	3.54432743291636
GO.0031967	Dn	0.1173325765469	-1.8667284787135		GO.0045184	Dn	0.000739173696873086	3.54254470912573
GO.0003677	Dn	0.117421784385816	-1.86279891069937		GO.0006397	Dn	0.000739173696873086	3.54236761591124
GO.0044429	Dn	0.12325359904004	-1.83758774872201		GO.0008380	Dn	0.000739173696873086	3.54236761591124
GO.0044427	Dn	0.124088119933205	-1.82920952027866		GO.0000398	Dn	0.00075107860058794	3.53525456013349
GO.0043231	Dn	0.124088119933205	-1.82742419753027		GO.0015031	Dn	0.00075107860058794	3.53395795921552
GO.0043233	Dn	0.124217042149039	-1.82058590852433		GO.0044421	Dn	0.000863460423707652	3.49483924738525
GO.0070013	Dn	0.124217042149039	-1.81709918480008		GO.0031982	Dn	0.00106912511105891	3.43407780591651
GO.0051234	Dn	0.124217042149039	-1.81642211179257		GO.0031988	Dn	0.00106912511105891	3.43319742792252
GO.0071822	Dn	0.126365125536578	-1.8041454140001		GO.0043624	Dn	0.00108772310515403	3.42643839191312
GO.0019866	Dn	0.126365125536578	-1.79907164620695		GO.0044444	Dn	0.0011194525286142	3.41655166666457
GO.0005740	Dn	0.126365125536578	-1.79828935302678		GO.0009056	Dn	0.0011396239546449	3.40959784734183
GO.0006810	Dn	0.12779007001076	-1.78975689423754		GO.0071702	Dn	0.0011396239546449	3.40758452796348
GO.0044446	Dn	0.131242358625365	-1.76980488756075		GO.0006886	Dn	0.00121539732463239	3.38793863878593
GO.0000785	Dn	0.131242358625365	-1.76843420492702		GO.0000228	Dn	0.00123305195245005	3.38195424560914
GO.0051084	Dn	0.131242358625365	-1.76608742301652		GO.0008152	Dn	0.0012445830214003	3.37738199509752
GO.0031966	Dn	0.131242358625365	-1.76400269351382		GO.1902582	Dn	0.00126824224753953	3.36993537799788
GO.0005743	Dn	0.132714776836684	-1.74975657911223		GO.0043226	Dn	0.00126824224753953	3.36820583689408
GO.0005856	Dn	0.132714776836684	-1.74876382088071		GO.0044451	Dn	0.00127288674043579	3.36522066668063
GO.0005694	Dn	0.132714776836684	-1.74758412999564		GO.0097159	Dn	0.00135348707946532	3.3443110557512
GO.0080090	Dn	0.132714776836684	-1.7455914615335		GO.1901363	Dn	0.00135348707946532	3.3443110557512
GO.0010467	Dn	0.134809127978208	-1.73484071823889		GO.0044297	Dn	0.00140128694323597	3.33271907962074
GO.0010941	Dn	0.134809127978208	-1.73176443641236		GO.0005622	Dn	0.00141198786606929	3.3267331093931
GO.0051082	Dn	0.139920212982411	-1.7062320313319		GO.0044424	Dn	0.00141198786606929	3.3267331093931
GO.0043209	Dn	0.139920212982411	-1.70407680891481		GO.0005681	Dn	0.00146320718684685	3.3142169596258
GO.0060255	Dn	0.139920212982411	-1.70293869700782		GO.0044446	Dn	0.00146320718684685	3.31239549103769
GO.0005759	Dn	0.139920212982411	-1.70135493317372		GO.0044429	Dn	0.00146320718684685	3.31106410098809
GO.0006325	Dn	0.141338768449105	-1.69337547887237		GO.0043227	Dn	0.00174685895982877	3.25924537217847
GO.0042981	Dn	0.145651082983576	-1.67585401131862		GO.0006396	Dn	0.00180996187914665	3.24726180721379
GO.0051179	Dn	0.145764410377496	-1.67229914842911		GO.0034641	Dn	0.00183253714449064	3.24183924767825
GO.0080135	Dn	0.146436593313847	-1.66692433451191		GO.0071840	Dn	0.00187124388660095	3.23399273091073
GO.0019222	Dn	0.149411339026278	-1.65407975733047		GO.0031625	Dn	0.00200952676749022	3.21067149234811
GO.0016032	Dn	0.151465372549538	-1.64431980544305		GO.0003697	Dn	0.00200952676749022	3.20981915366423
GO.0051641	Dn	0.153883098730938	-1.63347761469615		GO.0016071	Dn	0.00201341578116921	3.20634748620285
GO.0005925	Dn	0.157717805418723	-1.61401206344558		GO.0005740	Dn	0.00201341578116921	3.20555175205565
GO.0005912	Dn	0.157717805418723	-1.6115084243021		GO.0015629	Dn	0.00220819911746973	3.17544017527814
GO.0019538	Dn	0.157717805418723	-1.60578922949295		GO.0003729	Dn	0.00220819911746973	3.17518589143661
GO.0044765	Dn	0.157717805418723	-1.60529960794896		GO.0022613	Dn	0.00221373413303911	3.17262794962368
GO.0006457	Dn	0.157717805418723	-1.6019702444426		GO.0043234	Dn	0.00232806118442259	3.15614956344999
GO.0051704	Dn	0.157717805418723	-1.59787043424361		GO.0044454	Dn	0.00241845788917877	3.1431987568073
GO.0043227	Dn	0.157717805418723	-1.59743010541088		GO.0005515	Dn	0.00243397809034983	3.13819241474558
GO.0051649	Dn	0.157717805418723	-1.59669023353842		GO.0000785	Dn	0.00243397809034983	3.13632641989849
GO.0044267	Dn	0.158867758777606	-1.59006087737103		GO.0003676	Dn	0.00243397809034983	3.13591537665573
GO.0003723	Dn	0.161944212710524	-1.57749564224139		GO.0015630	Dn	0.00255024721506673	3.11995168685488
GO.0044822	Dn	0.1666235640672	-1.56020963125381		GO.0016032	Dn	0.00255024721506673	3.1186341134106
GO.0019899	Dn	0.174965275177997	-1.53247891854437		GO.0046907	Dn	0.00255304045818949	3.116541115739
GO.0019900	Dn	0.176305967536576	-1.52322555675365		GO.0044427	Dn	0.00282275454651287	3.08503371078492
GO.0030054	Dn	0.176305967536576	-1.52012463883009		GO.0071822	Dn	0.00295102575727218	3.07002011091555
GO.0005829	Dn	0.176305967536576	-1.51950569638293		GO.0006461	Dn	0.00300522503047438	3.06105966150099
GO.0003676	Dn	0.177483013006481	-1.51309403930105		GO.0070271	Dn	0.00300522503047438	3.06105966150099
GO.0015630	Dn	0.17953632927716	-1.50418687620212		GO.0005694	Dn	0.00316730104972118	3.04354387011543
GO.0044297	Dn	0.180952544398037	-1.49714580782089		GO.0043933	Dn	0.00326648317775179	3.03140815183714
GO.0015629	Dn	0.182591756486687	-1.4873471378065		GO.0061024	Dn	0.00326648317775179	3.03076528199456
GO.0044260	Dn	0.182591756486687	-1.48652718678045		GO.0016482	Dn	0.00358183523271634	3.00108216959451
GO.0005739	Dn	0.188114890348044	-1.46803260024332		GO.0005912	Dn	0.00370988961188192	2.98655528086207
GO.0006366	Dn	0.192483218153785	-1.45300935310317		GO.0005925	Dn	0.00370988961188192	2.98617260426589
GO.0005515	Dn	0.196763041423183	-1.43841326910943		GO.0005524	Dn	0.00370988961188192	2.98517464441702
GO.0022613	Dn	0.196830775403995	-1.4339355308779		GO.0030554	Dn	0.00390328275801674	2.96787533018028
GO.0006367	Dn	0.196830775403995	-1.43229955725993		GO.0016043	Dn	0.0040927467714213	2.95155536075779
GO.0005615	Dn	0.200760114806494	-1.41725349381678		GO.0051082	Dn	0.00411737380626191	2.94798992065353
GO.0044430	Dn	0.200760114806494	-1.41585858151193		GO.0019866	Dn	0.00418935079856627	2.9409220758798
GO.1901363	Dn	0.203920695068243	-1.40453065690246		GO.0044260	Dn	0.00419344289207065	2.93892172281776
GO.0019901	Dn	0.204701864049268	-1.39929156188219		GO.0043065	Dn	0.00436918777814437	2.92275165628364
GO.0042802	Dn	0.204701864049268	-1.39660786806578		GO.0006725	Dn	0.00436918777814437	2.9196823088099
GO.0097159	Dn	0.208454094701583	-1.38350232691754		GO.0046483	Dn	0.00436918777814437	2.9196823088099
GO.0005524	Dn	0.208454094701583	-1.37979484658135		GO.0006139	Dn	0.00436918777814437	2.9194406714677
GO.1901265	Dn	0.208454094701583	-1.37802775126598		GO.0005615	Dn	0.00446579819025246	2.91095102054968
GO.0000166	Dn	0.209765567264038	-1.36884724537203		GO.1901360	Dn	0.00454355998944624	2.90389234376836
GO.0000228	Dn	0.209765567264038	-1.36786513167604		GO.0035639	Dn	0.00473842170564806	2.88547687517962
GO.0044454	Dn	0.209765567264038	-1.3659528967327		GO.0032553	Dn	0.00473842170564806	2.885135783836
GO.0003729	Dn	0.212027713664952	-1.35719859841204		GO.0032550	Dn	0.00473842170564806	2.8841306523302
GO.0036094	Dn	0.213256659938487	-1.35115409956119		GO.0032555	Dn	0.00473842170564806	2.8841306523302
GO.0043229	Dn	0.215300191387252	-1.34302826930312		GO.0051704	Dn	0.0047779606359289	2.87988391780886
GO.0043005	Dn	0.217580614287214	-1.33433111726103		GO.0005739	Dn	0.00512348388204659	2.85600427918926
GO.0016482	Dn	0.217934288676211	-1.32903487380752		GO.0017076	Dn	0.00512348388204659	2.85454272356192
GO.0035639	Dn	0.217934288676211	-1.32774598037803		GO.0044085	Dn	0.00513620756856393	2.85213755361319
GO.0006913	Dn	0.221297577109795	-1.31361567124434		GO.0022607	Dn	0.00514546020622967	2.84995532727973
GO.0032550	Dn	0.221297577109795	-1.30978649082254		GO.0030054	Dn	0.00526020414516335	2.84132709134947
GO.0032555	Dn	0.221297577109795	-1.30978649082254		GO.0097367	Dn	0.00537044411226679	2.83161935680215
GO.0030554	Dn	0.221297577109795	-1.30790723039633		GO.0005856	Dn	0.00537044411226679	2.83151042100993
GO.0032553	Dn	0.223321892423316	-1.29997500029958		GO.0031966	Dn	0.00541899668109334	2.8270421551093
GO.0097367	Dn	0.227821892774843	-1.28586952254125		GO.0044765	Dn	0.00557784325699015	2.81619169883632
GO.0008152	Dn	0.232310887592501	-1.27193375607889		GO.0065003	Dn	0.00579572310667641	2.80221160709203
GO.0043065	Dn	0.233581260786918	-1.26600467169118		GO.0034622	Dn	0.00579572310667641	2.80069674192484
GO.0017076	Dn	0.244148126882761	-1.2376219170796		GO.0005743	Dn	0.00600400033191271	2.78770670368262
GO.0071702	Dn	0.244449579503121	-1.23408308995413		GO.0051234	Dn	0.0063599691162879	2.76741527531817
GO.0006886	Dn	0.258077103560934	-1.19936403127719		GO.0006325	Dn	0.00643222047614655	2.76215801707145
GO.0044237	Dn	0.268589911165401	-1.17268039157286		GO.0051179	Dn	0.00654769240403818	2.75477494343609
GO.0031625	Dn	0.276972351476829	-1.15124432873245		GO.0005759	Dn	0.00659792048722264	2.75071014298016
GO.0043933	Dn	0.279392871620066	-1.14306301479251		GO.0006810	Dn	0.00662583614244245	2.7477693237762
GO.0044712	Dn	0.281336236115803	-1.13594459885754		GO.1901575	Dn	0.00803736389191325	2.6822459956775
GO.0015031	Dn	0.288995628285942	-1.11654449195277		GO.0043209	Dn	0.00850947953908725	2.66151220302025
GO.0071704	Dn	0.289070535216418	-1.11348948972403		GO.0006913	Dn	0.0085123031668558	2.6598232458837
GO.0045184	Dn	0.289075169692376	-1.11059391694862		GO.0051641	Dn	0.0118624703138804	2.544416231882
GO.0003674	Dn	0.319128518967489	-1.04538630438325		GO.0051649	Dn	0.0119301912370285	2.54080532418841
GO.0044238	Dn	0.36049001511722	-0.962625818532329		GO.0044430	Dn	0.0129321287161189	2.51085001936848
GO.0009056	Dn	0.407021681365841	-0.876389050448202		GO.0051084	Dn	0.0159604960008678	2.43399997164322
GO.0043226	Dn	0.434137796871042	-0.827326082744623		GO.0003674	Dn	0.0248701312993841	2.2672363947654
GO.1901575	Dn	0.44010607225459	-0.814164363218996		GO.0006457	Dn	0.0367375902279536	2.11198362968881
GO.0044444	Dn	0.454792636081864	-0.786849727681334		GO.0005488	Dn	0.0375445479388608	2.10134236739769
GO.0005488	Dn	0.458849142574854	-0.776952599147473		GO.0009987	Dn	0.0724777342437666	1.81805296028369
GO.0005737	Dn	0.471912094232215	-0.752653172558119		GO.0043229	Dn	0.201076975839283	1.30337413413726
GO.0070972	Dn	0.501637087325549	-0.702671412067751		GO.0044248	Dn	0.202879230015212	1.29580494718813
GO.0033365	Dn	0.532961932055796	-0.651594479576027		GO.0043066	Dn	0.207407733534279	1.28073592156775
GO.0044248	Dn	0.596001720726984	-0.556167887449431		GO.0060548	Dn	0.211712947576037	1.26644873358614
GO.0010468	Dn	0.613699171287861	-0.527428928178309		GO.0033365	Dn	0.229726824779756	1.2164563940058
GO.0044265	Dn	0.644899739101394	-0.48023445605542		GO.0070972	Dn	0.25566123689851	1.14992456006108
GO.0060548	Dn	0.832741305054716	-0.229545041475294		GO.0010468	Dn	0.265465855606733	1.12424641949522
GO.0043066	Dn	0.86853720354824	-0.17974301648962		GO.0008104	Dn	0.313413065044472	1.01652866647036
GO.0034613	Dn	0.947161814458629	-0.0764869824598593		GO.0044265	Dn	0.316302011269958	1.0077240154864
GO.0033036	Dn	0.973627781561557	0.038299208870559		GO.0034613	Dn	0.328661672829108	0.979665810984289
GO.0008104	Dn	0.990342893347749	-0.0121036838162578		GO.0033036	Dn	0.411571285383818	0.821131647128383
GO.0000166	E	0.2172538651523	1.2338632514505		GO.0000166	E	0.275561367974965	-1.09034461764255
GO.0000184	E	0.2172538651523	1.2338632514505		GO.0000184	E	0.275561367974965	-1.09034461764255
GO.0000228	E	0.2172538651523	1.2338632514505		GO.0000228	E	0.275561367974965	-1.09034461764255
GO.0000375	E	0.2172538651523	1.2338632514505		GO.0000375	E	0.275561367974965	-1.09034461764255
GO.0000398	E	0.2172538651523	1.2338632514505		GO.0000398	E	0.275561367974965	-1.09034461764255
GO.0000785	E	0.2172538651523	1.2338632514505		GO.0000785	E	0.275561367974965	-1.09034461764255
GO.0000956	E	0.2172538651523	1.2338632514505		GO.0000956	E	0.275561367974965	-1.09034461764255
GO.0003674	E	0.2172538651523	1.2338632514505		GO.0003674	E	0.275561367974965	-1.09034461764255
GO.0003676	E	0.2172538651523	1.2338632514505		GO.0003676	E	0.275561367974965	-1.09034461764255
GO.0003677	E	0.2172538651523	1.2338632514505		GO.0003677	E	0.275561367974965	-1.09034461764255
GO.0003697	E	0.2172538651523	1.2338632514505		GO.0003697	E	0.275561367974965	-1.09034461764255
GO.0003723	E	0.2172538651523	1.2338632514505		GO.0003723	E	0.275561367974965	-1.09034461764255
GO.0003729	E	0.2172538651523	1.2338632514505		GO.0003729	E	0.275561367974965	-1.09034461764255
GO.0003735	E	0.2172538651523	1.2338632514505		GO.0003735	E	0.275561367974965	-1.09034461764255
GO.0005198	E	0.2172538651523	1.2338632514505		GO.0005198	E	0.275561367974965	-1.09034461764255
GO.0005488	E	0.2172538651523	1.2338632514505		GO.0005488	E	0.275561367974965	-1.09034461764255
GO.0005515	E	0.2172538651523	1.2338632514505		GO.0005515	E	0.275561367974965	-1.09034461764255
GO.0005524	E	0.2172538651523	1.2338632514505		GO.0005524	E	0.275561367974965	-1.09034461764255
GO.0005576	E	0.2172538651523	1.2338632514505		GO.0005576	E	0.275561367974965	-1.09034461764255
GO.0005615	E	0.2172538651523	1.2338632514505		GO.0005615	E	0.275561367974965	-1.09034461764255
GO.0005622	E	0.2172538651523	1.2338632514505		GO.0005622	E	0.275561367974965	-1.09034461764255
GO.0005634	E	0.2172538651523	1.2338632514505		GO.0005634	E	0.275561367974965	-1.09034461764255
GO.0005654	E	0.2172538651523	1.2338632514505		GO.0005654	E	0.275561367974965	-1.09034461764255
GO.0005681	E	0.2172538651523	1.2338632514505		GO.0005681	E	0.275561367974965	-1.09034461764255
GO.0005694	E	0.2172538651523	1.2338632514505		GO.0005694	E	0.275561367974965	-1.09034461764255
GO.0005730	E	0.2172538651523	1.2338632514505		GO.0005730	E	0.275561367974965	-1.09034461764255
GO.0005737	E	0.2172538651523	1.2338632514505		GO.0005737	E	0.275561367974965	-1.09034461764255
GO.0005739	E	0.2172538651523	1.2338632514505		GO.0005739	E	0.275561367974965	-1.09034461764255
GO.0005740	E	0.2172538651523	1.2338632514505		GO.0005740	E	0.275561367974965	-1.09034461764255
GO.0005743	E	0.2172538651523	1.2338632514505		GO.0005743	E	0.275561367974965	-1.09034461764255
GO.0005759	E	0.2172538651523	1.2338632514505		GO.0005759	E	0.275561367974965	-1.09034461764255
GO.0005829	E	0.2172538651523	1.2338632514505		GO.0005829	E	0.275561367974965	-1.09034461764255
GO.0005840	E	0.2172538651523	1.2338632514505		GO.0005840	E	0.275561367974965	-1.09034461764255
GO.0005856	E	0.2172538651523	1.2338632514505		GO.0005856	E	0.275561367974965	-1.09034461764255
GO.0005874	E	0.2172538651523	1.2338632514505		GO.0005874	E	0.275561367974965	-1.09034461764255
GO.0005912	E	0.2172538651523	1.2338632514505		GO.0005912	E	0.275561367974965	-1.09034461764255
GO.0005925	E	0.2172538651523	1.2338632514505		GO.0005925	E	0.275561367974965	-1.09034461764255
GO.0006091	E	0.2172538651523	1.2338632514505		GO.0006091	E	0.275561367974965	-1.09034461764255
GO.0006139	E	0.2172538651523	1.2338632514505		GO.0006139	E	0.275561367974965	-1.09034461764255
GO.0006325	E	0.2172538651523	1.2338632514505		GO.0006325	E	0.275561367974965	-1.09034461764255
GO.0006351	E	0.2172538651523	1.2338632514505		GO.0006351	E	0.275561367974965	-1.09034461764255
GO.0006366	E	0.2172538651523	1.2338632514505		GO.0006366	E	0.275561367974965	-1.09034461764255
GO.0006367	E	0.2172538651523	1.2338632514505		GO.0006367	E	0.275561367974965	-1.09034461764255
GO.0006396	E	0.2172538651523	1.2338632514505		GO.0006396	E	0.275561367974965	-1.09034461764255
GO.0006397	E	0.2172538651523	1.2338632514505		GO.0006397	E	0.275561367974965	-1.09034461764255
GO.0006401	E	0.2172538651523	1.2338632514505		GO.0006401	E	0.275561367974965	-1.09034461764255
GO.0006402	E	0.2172538651523	1.2338632514505		GO.0006402	E	0.275561367974965	-1.09034461764255
GO.0006412	E	0.2172538651523	1.2338632514505		GO.0006412	E	0.275561367974965	-1.09034461764255
GO.0006413	E	0.2172538651523	1.2338632514505		GO.0006413	E	0.275561367974965	-1.09034461764255
GO.0006414	E	0.2172538651523	1.2338632514505		GO.0006414	E	0.275561367974965	-1.09034461764255
GO.0006415	E	0.2172538651523	1.2338632514505		GO.0006415	E	0.275561367974965	-1.09034461764255
GO.0006417	E	0.2172538651523	1.2338632514505		GO.0006417	E	0.275561367974965	-1.09034461764255
GO.0006457	E	0.2172538651523	1.2338632514505		GO.0006457	E	0.275561367974965	-1.09034461764255
GO.0006461	E	0.2172538651523	1.2338632514505		GO.0006461	E	0.275561367974965	-1.09034461764255
GO.0006518	E	0.2172538651523	1.2338632514505		GO.0006518	E	0.275561367974965	-1.09034461764255
GO.0006605	E	0.2172538651523	1.2338632514505		GO.0006605	E	0.275561367974965	-1.09034461764255
GO.0006614	E	0.2172538651523	1.2338632514505		GO.0006614	E	0.275561367974965	-1.09034461764255
GO.0006725	E	0.2172538651523	1.2338632514505		GO.0006725	E	0.275561367974965	-1.09034461764255
GO.0006732	E	0.2172538651523	1.2338632514505		GO.0006732	E	0.275561367974965	-1.09034461764255
GO.0006753	E	0.2172538651523	1.2338632514505		GO.0006753	E	0.275561367974965	-1.09034461764255
GO.0006810	E	0.2172538651523	1.2338632514505		GO.0006810	E	0.275561367974965	-1.09034461764255
GO.0006886	E	0.2172538651523	1.2338632514505		GO.0006886	E	0.275561367974965	-1.09034461764255
GO.0006913	E	0.2172538651523	1.2338632514505		GO.0006913	E	0.275561367974965	-1.09034461764255
GO.0006950	E	0.2172538651523	1.2338632514505		GO.0006950	E	0.275561367974965	-1.09034461764255
GO.0006996	E	0.2172538651523	1.2338632514505		GO.0006996	E	0.275561367974965	-1.09034461764255
GO.0008104	E	0.2172538651523	1.2338632514505		GO.0008104	E	0.275561367974965	-1.09034461764255
GO.0008152	E	0.2172538651523	1.2338632514505		GO.0008152	E	0.275561367974965	-1.09034461764255
GO.0008380	E	0.2172538651523	1.2338632514505		GO.0008380	E	0.275561367974965	-1.09034461764255
GO.0009056	E	0.2172538651523	1.2338632514505		GO.0009056	E	0.275561367974965	-1.09034461764255
GO.0009058	E	0.2172538651523	1.2338632514505		GO.0009058	E	0.275561367974965	-1.09034461764255
GO.0009116	E	0.2172538651523	1.2338632514505		GO.0009116	E	0.275561367974965	-1.09034461764255
GO.0009117	E	0.2172538651523	1.2338632514505		GO.0009117	E	0.275561367974965	-1.09034461764255
GO.0009123	E	0.2172538651523	1.2338632514505		GO.0009123	E	0.275561367974965	-1.09034461764255
GO.0009141	E	0.2172538651523	1.2338632514505		GO.0009141	E	0.275561367974965	-1.09034461764255
GO.0009150	E	0.2172538651523	1.2338632514505		GO.0009150	E	0.275561367974965	-1.09034461764255
GO.0009163	E	0.2172538651523	1.2338632514505		GO.0009163	E	0.275561367974965	-1.09034461764255
GO.0009167	E	0.2172538651523	1.2338632514505		GO.0009167	E	0.275561367974965	-1.09034461764255
GO.0009205	E	0.2172538651523	1.2338632514505		GO.0009205	E	0.275561367974965	-1.09034461764255
GO.0009892	E	0.2172538651523	1.2338632514505		GO.0009892	E	0.275561367974965	-1.09034461764255
GO.0009987	E	0.2172538651523	1.2338632514505		GO.0009987	E	0.275561367974965	-1.09034461764255
GO.0010467	E	0.2172538651523	1.2338632514505		GO.0010467	E	0.275561367974965	-1.09034461764255
GO.0010468	E	0.2172538651523	1.2338632514505		GO.0010468	E	0.275561367974965	-1.09034461764255
GO.0010556	E	0.2172538651523	1.2338632514505		GO.0010556	E	0.275561367974965	-1.09034461764255
GO.0010608	E	0.2172538651523	1.2338632514505		GO.0010608	E	0.275561367974965	-1.09034461764255
GO.0010629	E	0.2172538651523	1.2338632514505		GO.0010629	E	0.275561367974965	-1.09034461764255
GO.0010638	E	0.2172538651523	1.2338632514505		GO.0010638	E	0.275561367974965	-1.09034461764255
GO.0010821	E	0.2172538651523	1.2338632514505		GO.0010821	E	0.275561367974965	-1.09034461764255
GO.0010941	E	0.2172538651523	1.2338632514505		GO.0010941	E	0.275561367974965	-1.09034461764255
GO.0015031	E	0.2172538651523	1.2338632514505		GO.0015031	E	0.275561367974965	-1.09034461764255
GO.0015629	E	0.2172538651523	1.2338632514505		GO.0015629	E	0.275561367974965	-1.09034461764255
GO.0015630	E	0.2172538651523	1.2338632514505		GO.0015630	E	0.275561367974965	-1.09034461764255
GO.0016032	E	0.2172538651523	1.2338632514505		GO.0016032	E	0.275561367974965	-1.09034461764255
GO.0016043	E	0.2172538651523	1.2338632514505		GO.0016043	E	0.275561367974965	-1.09034461764255
GO.0016070	E	0.2172538651523	1.2338632514505		GO.0016070	E	0.275561367974965	-1.09034461764255
GO.0016071	E	0.2172538651523	1.2338632514505		GO.0016071	E	0.275561367974965	-1.09034461764255
GO.0016482	E	0.2172538651523	1.2338632514505		GO.0016482	E	0.275561367974965	-1.09034461764255
GO.0016604	E	0.2172538651523	1.2338632514505		GO.0016604	E	0.275561367974965	-1.09034461764255
GO.0017076	E	0.2172538651523	1.2338632514505		GO.0017076	E	0.275561367974965	-1.09034461764255
GO.0018130	E	0.2172538651523	1.2338632514505		GO.0018130	E	0.275561367974965	-1.09034461764255
GO.0019058	E	0.2172538651523	1.2338632514505		GO.0019058	E	0.275561367974965	-1.09034461764255
GO.0019080	E	0.2172538651523	1.2338632514505		GO.0019080	E	0.275561367974965	-1.09034461764255
GO.0019083	E	0.2172538651523	1.2338632514505		GO.0019083	E	0.275561367974965	-1.09034461764255
GO.0019222	E	0.2172538651523	1.2338632514505		GO.0019222	E	0.275561367974965	-1.09034461764255
GO.0019438	E	0.2172538651523	1.2338632514505		GO.0019438	E	0.275561367974965	-1.09034461764255
GO.0019538	E	0.2172538651523	1.2338632514505		GO.0019538	E	0.275561367974965	-1.09034461764255
GO.0019637	E	0.2172538651523	1.2338632514505		GO.0019637	E	0.275561367974965	-1.09034461764255
GO.0019693	E	0.2172538651523	1.2338632514505		GO.0019693	E	0.275561367974965	-1.09034461764255
GO.0019866	E	0.2172538651523	1.2338632514505		GO.0019866	E	0.275561367974965	-1.09034461764255
GO.0019899	E	0.2172538651523	1.2338632514505		GO.0019899	E	0.275561367974965	-1.09034461764255
GO.0019900	E	0.2172538651523	1.2338632514505		GO.0019900	E	0.275561367974965	-1.09034461764255
GO.0019901	E	0.2172538651523	1.2338632514505		GO.0019901	E	0.275561367974965	-1.09034461764255
GO.0022411	E	0.2172538651523	1.2338632514505		GO.0022411	E	0.275561367974965	-1.09034461764255
GO.0022607	E	0.2172538651523	1.2338632514505		GO.0022607	E	0.275561367974965	-1.09034461764255
GO.0022613	E	0.2172538651523	1.2338632514505		GO.0022613	E	0.275561367974965	-1.09034461764255
GO.0022626	E	0.2172538651523	1.2338632514505		GO.0022626	E	0.275561367974965	-1.09034461764255
GO.0030054	E	0.2172538651523	1.2338632514505		GO.0030054	E	0.275561367974965	-1.09034461764255
GO.0030529	E	0.2172538651523	1.2338632514505		GO.0030529	E	0.275561367974965	-1.09034461764255
GO.0030554	E	0.2172538651523	1.2338632514505		GO.0030554	E	0.275561367974965	-1.09034461764255
GO.0031625	E	0.2172538651523	1.2338632514505		GO.0031625	E	0.275561367974965	-1.09034461764255
GO.0031966	E	0.2172538651523	1.2338632514505		GO.0031966	E	0.275561367974965	-1.09034461764255
GO.0031967	E	0.2172538651523	1.2338632514505		GO.0031967	E	0.275561367974965	-1.09034461764255
GO.0031974	E	0.2172538651523	1.2338632514505		GO.0031974	E	0.275561367974965	-1.09034461764255
GO.0031981	E	0.2172538651523	1.2338632514505		GO.0031981	E	0.275561367974965	-1.09034461764255
GO.0031982	E	0.2172538651523	1.2338632514505		GO.0031982	E	0.275561367974965	-1.09034461764255
GO.0031988	E	0.2172538651523	1.2338632514505		GO.0031988	E	0.275561367974965	-1.09034461764255
GO.0032550	E	0.2172538651523	1.2338632514505		GO.0032550	E	0.275561367974965	-1.09034461764255
GO.0032553	E	0.2172538651523	1.2338632514505		GO.0032553	E	0.275561367974965	-1.09034461764255
GO.0032555	E	0.2172538651523	1.2338632514505		GO.0032555	E	0.275561367974965	-1.09034461764255
GO.0032774	E	0.2172538651523	1.2338632514505		GO.0032774	E	0.275561367974965	-1.09034461764255
GO.0032991	E	0.2172538651523	1.2338632514505		GO.0032991	E	0.275561367974965	-1.09034461764255
GO.0033036	E	0.2172538651523	1.2338632514505		GO.0033036	E	0.275561367974965	-1.09034461764255
GO.0033365	E	0.2172538651523	1.2338632514505		GO.0033365	E	0.275561367974965	-1.09034461764255
GO.0034248	E	0.2172538651523	1.2338632514505		GO.0034248	E	0.275561367974965	-1.09034461764255
GO.0034613	E	0.2172538651523	1.2338632514505		GO.0034613	E	0.275561367974965	-1.09034461764255
GO.0034622	E	0.2172538651523	1.2338632514505		GO.0034622	E	0.275561367974965	-1.09034461764255
GO.0034641	E	0.2172538651523	1.2338632514505		GO.0034641	E	0.275561367974965	-1.09034461764255
GO.0034645	E	0.2172538651523	1.2338632514505		GO.0034645	E	0.275561367974965	-1.09034461764255
GO.0034654	E	0.2172538651523	1.2338632514505		GO.0034654	E	0.275561367974965	-1.09034461764255
GO.0034655	E	0.2172538651523	1.2338632514505		GO.0034655	E	0.275561367974965	-1.09034461764255
GO.0035639	E	0.2172538651523	1.2338632514505		GO.0035639	E	0.275561367974965	-1.09034461764255
GO.0036094	E	0.2172538651523	1.2338632514505		GO.0036094	E	0.275561367974965	-1.09034461764255
GO.0042802	E	0.2172538651523	1.2338632514505		GO.0042802	E	0.275561367974965	-1.09034461764255
GO.0042981	E	0.2172538651523	1.2338632514505		GO.0042981	E	0.275561367974965	-1.09034461764255
GO.0043005	E	0.2172538651523	1.2338632514505		GO.0043005	E	0.275561367974965	-1.09034461764255
GO.0043065	E	0.2172538651523	1.2338632514505		GO.0043065	E	0.275561367974965	-1.09034461764255
GO.0043066	E	0.2172538651523	1.2338632514505		GO.0043066	E	0.275561367974965	-1.09034461764255
GO.0043209	E	0.2172538651523	1.2338632514505		GO.0043209	E	0.275561367974965	-1.09034461764255
GO.0043226	E	0.2172538651523	1.2338632514505		GO.0043226	E	0.275561367974965	-1.09034461764255
GO.0043227	E	0.2172538651523	1.2338632514505		GO.0043227	E	0.275561367974965	-1.09034461764255
GO.0043229	E	0.2172538651523	1.2338632514505		GO.0043229	E	0.275561367974965	-1.09034461764255
GO.0043231	E	0.2172538651523	1.2338632514505		GO.0043231	E	0.275561367974965	-1.09034461764255
GO.0043232	E	0.2172538651523	1.2338632514505		GO.0043232	E	0.275561367974965	-1.09034461764255
GO.0043233	E	0.2172538651523	1.2338632514505		GO.0043233	E	0.275561367974965	-1.09034461764255
GO.0043234	E	0.2172538651523	1.2338632514505		GO.0043234	E	0.275561367974965	-1.09034461764255
GO.0043566	E	0.2172538651523	1.2338632514505		GO.0043566	E	0.275561367974965	-1.09034461764255
GO.0043624	E	0.2172538651523	1.2338632514505		GO.0043624	E	0.275561367974965	-1.09034461764255
GO.0043933	E	0.2172538651523	1.2338632514505		GO.0043933	E	0.275561367974965	-1.09034461764255
GO.0044085	E	0.2172538651523	1.2338632514505		GO.0044085	E	0.275561367974965	-1.09034461764255
GO.0044237	E	0.2172538651523	1.2338632514505		GO.0044237	E	0.275561367974965	-1.09034461764255
GO.0044238	E	0.2172538651523	1.2338632514505		GO.0044238	E	0.275561367974965	-1.09034461764255
GO.0044248	E	0.2172538651523	1.2338632514505		GO.0044248	E	0.275561367974965	-1.09034461764255
GO.0044249	E	0.2172538651523	1.2338632514505		GO.0044249	E	0.275561367974965	-1.09034461764255
GO.0044260	E	0.2172538651523	1.2338632514505		GO.0044260	E	0.275561367974965	-1.09034461764255
GO.0044265	E	0.2172538651523	1.2338632514505		GO.0044265	E	0.275561367974965	-1.09034461764255
GO.0044267	E	0.2172538651523	1.2338632514505		GO.0044267	E	0.275561367974965	-1.09034461764255
GO.0044271	E	0.2172538651523	1.2338632514505		GO.0044271	E	0.275561367974965	-1.09034461764255
GO.0044297	E	0.2172538651523	1.2338632514505		GO.0044297	E	0.275561367974965	-1.09034461764255
GO.0044391	E	0.2172538651523	1.2338632514505		GO.0044391	E	0.275561367974965	-1.09034461764255
GO.0044421	E	0.2172538651523	1.2338632514505		GO.0044421	E	0.275561367974965	-1.09034461764255
GO.0044422	E	0.2172538651523	1.2338632514505		GO.0044422	E	0.275561367974965	-1.09034461764255
GO.0044424	E	0.2172538651523	1.2338632514505		GO.0044424	E	0.275561367974965	-1.09034461764255
GO.0044427	E	0.2172538651523	1.2338632514505		GO.0044427	E	0.275561367974965	-1.09034461764255
GO.0044428	E	0.2172538651523	1.2338632514505		GO.0044428	E	0.275561367974965	-1.09034461764255
GO.0044429	E	0.2172538651523	1.2338632514505		GO.0044429	E	0.275561367974965	-1.09034461764255
GO.0044430	E	0.2172538651523	1.2338632514505		GO.0044430	E	0.275561367974965	-1.09034461764255
GO.0044444	E	0.2172538651523	1.2338632514505		GO.0044444	E	0.275561367974965	-1.09034461764255
GO.0044445	E	0.2172538651523	1.2338632514505		GO.0044445	E	0.275561367974965	-1.09034461764255
GO.0044446	E	0.2172538651523	1.2338632514505		GO.0044446	E	0.275561367974965	-1.09034461764255
GO.0044451	E	0.2172538651523	1.2338632514505		GO.0044451	E	0.275561367974965	-1.09034461764255
GO.0044454	E	0.2172538651523	1.2338632514505		GO.0044454	E	0.275561367974965	-1.09034461764255
GO.0044711	E	0.2172538651523	1.2338632514505		GO.0044711	E	0.275561367974965	-1.09034461764255
GO.0044712	E	0.2172538651523	1.2338632514505		GO.0044712	E	0.275561367974965	-1.09034461764255
GO.0044765	E	0.2172538651523	1.2338632514505		GO.0044765	E	0.275561367974965	-1.09034461764255
GO.0044802	E	0.2172538651523	1.2338632514505		GO.0044802	E	0.275561367974965	-1.09034461764255
GO.0044822	E	0.2172538651523	1.2338632514505		GO.0044822	E	0.275561367974965	-1.09034461764255
GO.0045184	E	0.2172538651523	1.2338632514505		GO.0045184	E	0.275561367974965	-1.09034461764255
GO.0046128	E	0.2172538651523	1.2338632514505		GO.0046128	E	0.275561367974965	-1.09034461764255
GO.0046483	E	0.2172538651523	1.2338632514505		GO.0046483	E	0.275561367974965	-1.09034461764255
GO.0046496	E	0.2172538651523	1.2338632514505		GO.0046496	E	0.275561367974965	-1.09034461764255
GO.0046907	E	0.2172538651523	1.2338632514505		GO.0046907	E	0.275561367974965	-1.09034461764255
GO.0048519	E	0.2172538651523	1.2338632514505		GO.0048519	E	0.275561367974965	-1.09034461764255
GO.0051082	E	0.2172538651523	1.2338632514505		GO.0051082	E	0.275561367974965	-1.09034461764255
GO.0051084	E	0.2172538651523	1.2338632514505		GO.0051084	E	0.275561367974965	-1.09034461764255
GO.0051179	E	0.2172538651523	1.2338632514505		GO.0051179	E	0.275561367974965	-1.09034461764255
GO.0051234	E	0.2172538651523	1.2338632514505		GO.0051234	E	0.275561367974965	-1.09034461764255
GO.0051641	E	0.2172538651523	1.2338632514505		GO.0051641	E	0.275561367974965	-1.09034461764255
GO.0051649	E	0.2172538651523	1.2338632514505		GO.0051649	E	0.275561367974965	-1.09034461764255
GO.0051704	E	0.2172538651523	1.2338632514505		GO.0051704	E	0.275561367974965	-1.09034461764255
GO.0055086	E	0.2172538651523	1.2338632514505		GO.0055086	E	0.275561367974965	-1.09034461764255
GO.0055114	E	0.2172538651523	1.2338632514505		GO.0055114	E	0.275561367974965	-1.09034461764255
GO.0060255	E	0.2172538651523	1.2338632514505		GO.0060255	E	0.275561367974965	-1.09034461764255
GO.0060548	E	0.2172538651523	1.2338632514505		GO.0060548	E	0.275561367974965	-1.09034461764255
GO.0061024	E	0.2172538651523	1.2338632514505		GO.0061024	E	0.275561367974965	-1.09034461764255
GO.0065003	E	0.2172538651523	1.2338632514505		GO.0065003	E	0.275561367974965	-1.09034461764255
GO.0070013	E	0.2172538651523	1.2338632514505		GO.0070013	E	0.275561367974965	-1.09034461764255
GO.0070062	E	0.2172538651523	1.2338632514505		GO.0070062	E	0.275561367974965	-1.09034461764255
GO.0070271	E	0.2172538651523	1.2338632514505		GO.0070271	E	0.275561367974965	-1.09034461764255
GO.0070972	E	0.2172538651523	1.2338632514505		GO.0070972	E	0.275561367974965	-1.09034461764255
GO.0071013	E	0.2172538651523	1.2338632514505		GO.0071013	E	0.275561367974965	-1.09034461764255
GO.0071702	E	0.2172538651523	1.2338632514505		GO.0071702	E	0.275561367974965	-1.09034461764255
GO.0071704	E	0.2172538651523	1.2338632514505		GO.0071704	E	0.275561367974965	-1.09034461764255
GO.0071705	E	0.2172538651523	1.2338632514505		GO.0071705	E	0.275561367974965	-1.09034461764255
GO.0071822	E	0.2172538651523	1.2338632514505		GO.0071822	E	0.275561367974965	-1.09034461764255
GO.0071840	E	0.2172538651523	1.2338632514505		GO.0071840	E	0.275561367974965	-1.09034461764255
GO.0072521	E	0.2172538651523	1.2338632514505		GO.0072521	E	0.275561367974965	-1.09034461764255
GO.0072524	E	0.2172538651523	1.2338632514505		GO.0072524	E	0.275561367974965	-1.09034461764255
GO.0072594	E	0.2172538651523	1.2338632514505		GO.0072594	E	0.275561367974965	-1.09034461764255
GO.0080090	E	0.2172538651523	1.2338632514505		GO.0080090	E	0.275561367974965	-1.09034461764255
GO.0080135	E	0.2172538651523	1.2338632514505		GO.0080135	E	0.275561367974965	-1.09034461764255
GO.0090304	E	0.2172538651523	1.2338632514505		GO.0090304	E	0.275561367974965	-1.09034461764255
GO.0097159	E	0.2172538651523	1.2338632514505		GO.0097159	E	0.275561367974965	-1.09034461764255
GO.0097367	E	0.2172538651523	1.2338632514505		GO.0097367	E	0.275561367974965	-1.09034461764255
GO.1901135	E	0.2172538651523	1.2338632514505		GO.1901135	E	0.275561367974965	-1.09034461764255
GO.1901265	E	0.2172538651523	1.2338632514505		GO.1901265	E	0.275561367974965	-1.09034461764255
GO.1901360	E	0.2172538651523	1.2338632514505		GO.1901360	E	0.275561367974965	-1.09034461764255
GO.1901362	E	0.2172538651523	1.2338632514505		GO.1901362	E	0.275561367974965	-1.09034461764255
GO.1901363	E	0.2172538651523	1.2338632514505		GO.1901363	E	0.275561367974965	-1.09034461764255
GO.1901564	E	0.2172538651523	1.2338632514505		GO.1901564	E	0.275561367974965	-1.09034461764255
GO.1901566	E	0.2172538651523	1.2338632514505		GO.1901566	E	0.275561367974965	-1.09034461764255
GO.1901575	E	0.2172538651523	1.2338632514505		GO.1901575	E	0.275561367974965	-1.09034461764255
GO.1901576	E	0.2172538651523	1.2338632514505		GO.1901576	E	0.275561367974965	-1.09034461764255
GO.1902580	E	0.2172538651523	1.2338632514505		GO.1902580	E	0.275561367974965	-1.09034461764255
GO.1902582	E	0.2172538651523	1.2338632514505		GO.1902582	E	0.275561367974965	-1.09034461764255
GO.0005740	Ec	1	1.42645023446435e-16		GO.0016604	Ec	0.575671276527699	-2.30540211085476
GO.0005743	Ec	1	5.54320902958632e-16		GO.1901135	Ec	0.575671276527699	2.19360005199645
GO.0006732	Ec	1	0		GO.0044451	Ec	0.575671276527699	-2.06022850303459
GO.0031966	Ec	1	1.50294804045478e-16		GO.0022613	Ec	0.575671276527699	-1.98099074311929
GO.0046496	Ec	1	0		GO.0032991	Ec	0.575671276527699	-1.9204236463474
GO.0072524	Ec	1	0		GO.0044711	Ec	0.575671276527699	-1.92003134770648
GO.0055114	Ec	0.424622030801632	-2.21022468715329		GO.0070972	Ec	0.575671276527699	-1.85562079933713
GO.0034613	Ec	0.424622030801632	2.17415703925482		GO.0009892	Ec	0.575671276527699	-1.82195007469711
GO.0034641	Ec	0.424622030801632	2.14479247927299		GO.0019693	Ec	0.575671276527699	1.81164325463135
GO.0043227	Ec	0.424622030801632	2.11343374443915		GO.1901575	Ec	0.575671276527699	-1.80984579333866
GO.0044238	Ec	0.424622030801632	2.10123736680606		GO.0071705	Ec	0.575671276527699	-1.74272018780716
GO.0044237	Ec	0.424622030801632	2.10107012631762		GO.0006401	Ec	0.575671276527699	-1.73205080756888
GO.0071704	Ec	0.424622030801632	2.08885883572297		GO.0006402	Ec	0.575671276527699	-1.73205080756888
GO.0006886	Ec	0.424622030801632	2.07185210691267		GO.0019058	Ec	0.575671276527699	-1.71181587469277
GO.0010467	Ec	0.424622030801632	2.02443358667097		GO.0006753	Ec	0.575671276527699	1.70560573084488
GO.0008104	Ec	0.424622030801632	2.02268741228498		GO.0009117	Ec	0.575671276527699	1.70560573084488
GO.0044712	Ec	0.424622030801632	-2.01951265718961		GO.0000184	Ec	0.575671276527699	-1.67617961662334
GO.0044260	Ec	0.424622030801632	1.98473862714628		GO.0000956	Ec	0.575671276527699	-1.67617961662334
GO.0015031	Ec	0.424622030801632	1.9293633674235		GO.0006614	Ec	0.575671276527699	-1.67617961662334
GO.0045184	Ec	0.424622030801632	1.9293633674235		GO.0019080	Ec	0.575671276527699	-1.67617961662334
GO.0005622	Ec	0.424622030801632	1.91982990903191		GO.0019083	Ec	0.575671276527699	-1.67617961662334
GO.0044424	Ec	0.424622030801632	1.91982990903191		GO.0034655	Ec	0.575671276527699	-1.6750597728793
GO.0008152	Ec	0.424622030801632	1.91940018065252		GO.0006457	Ec	0.575671276527699	1.66144015437857
GO.0033365	Ec	0.424622030801632	1.89941322065361		GO.0009056	Ec	0.575671276527699	-1.65846909845187
GO.0044802	Ec	0.424622030801632	1.86611807668823		GO.0060548	Ec	0.575671276527699	-1.6527242414403
GO.0009987	Ec	0.424622030801632	1.8405331849863		GO.0030529	Ec	0.575671276527699	-1.6386929807974
GO.0006605	Ec	0.424622030801632	1.795086866532		GO.0019901	Ec	0.575671276527699	-1.62748506178138
GO.0016482	Ec	0.424622030801632	1.7865349192399		GO.0010608	Ec	0.575671276527699	-1.61084985690906
GO.1901566	Ec	0.424622030801632	1.78503975657682		GO.0044265	Ec	0.575671276527699	-1.57166783109007
GO.0072594	Ec	0.424622030801632	1.77465330339222		GO.0000228	Ec	0.575671276527699	-1.56402811772464
GO.0043226	Ec	0.424622030801632	1.75135189072016		GO.0006325	Ec	0.575671276527699	-1.55876619995293
GO.1901564	Ec	0.424622030801632	1.73829795153415		GO.0031974	Ec	0.575671276527699	-1.53811790836675
GO.0044711	Ec	0.424622030801632	1.7128343189616		GO.0010556	Ec	0.575671276527699	-1.53661646749472
GO.0016070	Ec	0.424622030801632	1.7009856993106		GO.0006413	Ec	0.575671276527699	-1.5269238346356
GO.0009163	Ec	0.424622030801632	1.69850861253316		GO.0006415	Ec	0.575671276527699	-1.5269238346356
GO.0006139	Ec	0.424622030801632	1.68249500467629		GO.0005730	Ec	0.575671276527699	-1.52502067966126
GO.0006725	Ec	0.424622030801632	1.68249500467629		GO.0019900	Ec	0.575671276527699	-1.51010112423155
GO.0046483	Ec	0.424622030801632	1.68249500467629		GO.0044248	Ec	0.575671276527699	-1.48714629258965
GO.1901360	Ec	0.424622030801632	1.68249500467629		GO.0016032	Ec	0.575671276527699	-1.47771995869545
GO.0046907	Ec	0.424622030801632	1.68033610083361		GO.0005694	Ec	0.575671276527699	-1.47228735571677
GO.0006412	Ec	0.424622030801632	1.67588757612868		GO.0044427	Ec	0.575671276527699	-1.47228735571677
GO.0032991	Ec	0.424622030801632	1.66983656314898		GO.0044454	Ec	0.575671276527699	-1.4706132663702
GO.0043229	Ec	0.424622030801632	1.66332914032754		GO.0055086	Ec	0.575671276527699	1.45655310968257
GO.0061024	Ec	0.424622030801632	1.64567893058859		GO.0044765	Ec	0.575671276527699	-1.45492849808349
GO.0006518	Ec	0.424622030801632	1.64384220771325		GO.0032774	Ec	0.575671276527699	-1.45321345545775
GO.1902580	Ec	0.424622030801632	1.64209434622346		GO.0080090	Ec	0.575671276527699	-1.44200253685855
GO.0006950	Ec	0.424622030801632	1.62965784862882		GO.0003677	Ec	0.575671276527699	-1.4407527220187
GO.0006417	Ec	0.424622030801632	1.61840261143421		GO.0006366	Ec	0.575671276527699	-1.42837710476878
GO.0034248	Ec	0.424622030801632	1.61840261143421		GO.0009123	Ec	0.575671276527699	1.40129809949074
GO.0090304	Ec	0.424622030801632	1.61294772677728		GO.0009141	Ec	0.575671276527699	1.40129809949074
GO.0044267	Ec	0.424622030801632	1.59013874432882		GO.0009150	Ec	0.575671276527699	1.40129809949074
GO.0009058	Ec	0.424622030801632	1.58835086245102		GO.0009167	Ec	0.575671276527699	1.40129809949074
GO.0044085	Ec	0.424622030801632	1.57888963802008		GO.0009205	Ec	0.575671276527699	1.40129809949074
GO.0033036	Ec	0.424622030801632	1.55801965233217		GO.0000785	Ec	0.575671276527699	-1.39935444127868
GO.0032550	Ec	0.424622030801632	1.5461387019675		GO.0070013	Ec	0.575671276527699	-1.39296523215068
GO.0032553	Ec	0.424622030801632	1.5461387019675		GO.0009116	Ec	0.575671276527699	1.37649440322337
GO.0032555	Ec	0.424622030801632	1.5461387019675		GO.0046128	Ec	0.575671276527699	1.37649440322337
GO.0035639	Ec	0.424622030801632	1.5461387019675		GO.0072521	Ec	0.575671276527699	1.37649440322337
GO.0044271	Ec	0.424622030801632	1.54417039400901		GO.0036094	Ec	0.575671276527699	-1.37477772959793
GO.0003735	Ec	0.424622030801632	1.54370838501021		GO.0043233	Ec	0.575671276527699	-1.37456653896746
GO.0043933	Ec	0.424622030801632	1.53231064887884		GO.0018130	Ec	0.575671276527699	-1.37409522112028
GO.0044249	Ec	0.424622030801632	1.52726608502349		GO.0019438	Ec	0.575671276527699	-1.37409522112028
GO.0071702	Ec	0.424622030801632	1.50875239497065		GO.0034654	Ec	0.575671276527699	-1.37409522112028
GO.0005198	Ec	0.424622030801632	1.50361882311222		GO.1901362	Ec	0.575671276527699	-1.37409522112028
GO.0005634	Ec	0.424622030801632	1.49787751924789		GO.0022626	Ec	0.575671276527699	-1.36496813011121
GO.0051641	Ec	0.424622030801632	1.4937664923235		GO.0000166	Ec	0.575671276527699	-1.36441312458037
GO.0051649	Ec	0.424622030801632	1.4937664923235		GO.1901265	Ec	0.575671276527699	-1.36441312458037
GO.0022607	Ec	0.424622030801632	1.48981738513724		GO.0016043	Ec	0.575671276527699	-1.34628476295623
GO.1901576	Ec	0.424622030801632	1.48628911661821		GO.0005198	Ec	0.575671276527699	-1.3447004045817
GO.0071840	Ec	0.424622030801632	1.48368124732643		GO.0043933	Ec	0.575671276527699	-1.33857989924956
GO.0044422	Ec	0.424622030801632	1.48325002757335		GO.0010468	Ec	0.575671276527699	-1.33431855333171
GO.0044446	Ec	0.424622030801632	1.47683016644219		GO.0034645	Ec	0.575671276527699	-1.3219579477177
GO.1902582	Ec	0.424622030801632	1.47153630607842		GO.0006417	Ec	0.575671276527699	-1.3128663642779
GO.0065003	Ec	0.424622030801632	1.4537339378705		GO.0034248	Ec	0.575671276527699	-1.3128663642779
GO.0034645	Ec	0.424622030801632	1.4528029405529		GO.0051704	Ec	0.575671276527699	-1.30224071763656
GO.0006810	Ec	0.424622030801632	1.42616505463525		GO.0044271	Ec	0.575671276527699	-1.30148067399903
GO.0051234	Ec	0.424622030801632	1.41065106978231		GO.0044249	Ec	0.575671276527699	-1.30134355133022
GO.0043234	Ec	0.424622030801632	1.41040451099618		GO.0044445	Ec	0.575671276527699	-1.29913960492326
GO.0034622	Ec	0.424622030801632	1.40876066578215		GO.0005515	Ec	0.575671276527699	-1.29539302855446
GO.0022626	Ec	0.424622030801632	1.40772616267033		GO.0006996	Ec	0.605801318899871	-1.25525941308164
GO.0017076	Ec	0.424622030801632	1.38489684319104		GO.0010629	Ec	0.605801318899871	-1.25191604236649
GO.0015630	Ec	0.424622030801632	1.3835488730175		GO.0019637	Ec	0.608842389011953	1.23770549551055
GO.0000166	Ec	0.424622030801632	1.37741384074985		GO.1902582	Ec	0.608842389011953	-1.22055639539471
GO.1901265	Ec	0.424622030801632	1.37741384074985		GO.0009058	Ec	0.608842389011953	-1.21770656807138
GO.0070062	Ec	0.424622030801632	1.36662971125202		GO.0005840	Ec	0.608842389011953	-1.20983479623957
GO.0044445	Ec	0.424622030801632	1.36520356665061		GO.0044391	Ec	0.608842389011953	-1.20983479623957
GO.0031982	Ec	0.424622030801632	1.36317270035253		GO.0042802	Ec	0.608842389011953	-1.2057916609677
GO.0031988	Ec	0.424622030801632	1.36317270035253		GO.0043234	Ec	0.608842389011953	-1.20049009599756
GO.0019222	Ec	0.424622030801632	1.34430907311265		GO.0048519	Ec	0.616665705110809	-1.18618203427974
GO.0097367	Ec	0.424622030801632	1.34168110204255		GO.0006913	Ec	0.617527108415857	-1.17866955212782
GO.0006614	Ec	0.424622030801632	1.33196791225491		GO.0003729	Ec	0.619578621057172	-1.17004875304709
GO.0019080	Ec	0.424622030801632	1.31219446144074		GO.0043005	Ec	0.620348264286535	-1.16057691494799
GO.0019083	Ec	0.424622030801632	1.31219446144074		GO.0071840	Ec	0.620348264286535	-1.14449078411736
GO.0016043	Ec	0.424622030801632	1.31025349564472		GO.0033036	Ec	0.620348264286535	-1.13655934180492
GO.0019538	Ec	0.424622030801632	1.30570486706455		GO.0034622	Ec	0.620348264286535	-1.13610373968096
GO.0044391	Ec	0.424622030801632	1.30430766861515		GO.1901576	Ec	0.620348264286535	-1.13573103756064
GO.0036094	Ec	0.424622030801632	1.29975511053683		GO.0071013	Ec	0.620348264286535	-1.11053406858882
GO.0071705	Ec	0.424622030801632	1.29373303805119		GO.0019222	Ec	0.620348264286535	-1.11047205095381
GO.0006396	Ec	0.424622030801632	1.29225584021132		GO.0060255	Ec	0.620348264286535	-1.1009809273272
GO.0044765	Ec	0.424622030801632	1.28658524603668		GO.0051641	Ec	0.620348264286535	-1.09706920057968
GO.0003729	Ec	0.424622030801632	1.28625075607836		GO.0010941	Ec	0.620348264286535	-1.0894302713904
GO.0016071	Ec	0.424622030801632	1.28002534863692		GO.0065003	Ec	0.620348264286535	-1.08063426719036
GO.0044421	Ec	0.424622030801632	1.27903230427767		GO.0006950	Ec	0.620348264286535	-1.07958807252716
GO.0006913	Ec	0.424622030801632	1.27641721005856		GO.0019899	Ec	0.620348264286535	-1.06181293831045
GO.0005681	Ec	0.424622030801632	1.27487275299999		GO.0043231	Ec	0.620348264286535	-1.0599788200221
GO.0006413	Ec	0.424622030801632	1.27365281639708		GO.0051649	Ec	0.620348264286535	-1.05849248180158
GO.0005576	Ec	0.424622030801632	1.27235214221557		GO.0006351	Ec	0.620348264286535	-1.04964909573693
GO.0043231	Ec	0.424622030801632	1.27222824749334		GO.0003735	Ec	0.620348264286535	-1.04940281415232
GO.0006996	Ec	0.424622030801632	1.26930243650134		GO.0022607	Ec	0.620348264286535	-1.0313641022245
GO.1901575	Ec	0.424622030801632	1.26558730633114		GO.0090304	Ec	0.620348264286535	-1.02647870732196
GO.0005840	Ec	0.424622030801632	1.2619429464124		GO.0016071	Ec	0.620348264286535	-1.02081458414187
GO.0010608	Ec	0.424622030801632	1.26187856649518		GO.0043566	Ec	0.620348264286535	-1.0155292879814
GO.0051179	Ec	0.424622030801632	1.26039845655805		GO.0009987	Ec	0.620348264286535	-1.01101261498861
GO.0019901	Ec	0.424622030801632	1.25888758045413		GO.0051234	Ec	0.620348264286535	-1.00919948032968
GO.0005856	Ec	0.424622030801632	1.25358682855156		GO.0006810	Ec	0.620348264286535	-0.998798465299247
GO.0030529	Ec	0.424622030801632	1.25236322508903		GO.0043232	Ec	0.620348264286535	-0.997648295816127
GO.0022613	Ec	0.424622030801632	1.23682365557993		GO.0005737	Ec	0.620348264286535	-0.994557782723073
GO.0034655	Ec	0.424622030801632	1.23607552064384		GO.0044085	Ec	0.620348264286535	-0.986267958857384
GO.0060255	Ec	0.424622030801632	1.23064665415917		GO.0017076	Ec	0.620348264286535	-0.976823946280205
GO.0051084	Ec	0.424622030801632	1.22474487139159		GO.0005743	Ec	0.620348264286535	0.973328526784575
GO.0006415	Ec	0.424622030801632	1.21063886892651		GO.0031966	Ec	0.620348264286535	0.973328526784575
GO.0070972	Ec	0.424622030801632	1.21025507597691		GO.0006518	Ec	0.620348264286535	-0.957037767287327
GO.0044444	Ec	0.424622030801632	1.20790111471731		GO.0051179	Ec	0.620348264286535	-0.947051855230138
GO.0005912	Ec	0.424622030801632	1.20408227559168		GO.0005912	Ec	0.620348264286535	-0.944349237077873
GO.0016032	Ec	0.424622030801632	1.20330385078212		GO.0005925	Ec	0.620348264286535	-0.944349237077873
GO.0018130	Ec	0.424622030801632	1.2032603949568		GO.0032550	Ec	0.620348264286535	-0.930757841991035
GO.0019438	Ec	0.424622030801632	1.2032603949568		GO.0032553	Ec	0.620348264286535	-0.930757841991035
GO.0034654	Ec	0.424622030801632	1.2032603949568		GO.0032555	Ec	0.620348264286535	-0.930757841991035
GO.1901362	Ec	0.424622030801632	1.2032603949568		GO.0035639	Ec	0.620348264286535	-0.930757841991035
GO.0080090	Ec	0.424622030801632	1.2022529999517		GO.0030054	Ec	0.620348264286535	-0.929438677008484
GO.0010556	Ec	0.424622030801632	1.20042389595738		GO.0031982	Ec	0.620348264286535	-0.904851976190312
GO.0005925	Ec	0.424622030801632	1.19942810140265		GO.0031988	Ec	0.620348264286535	-0.904851976190312
GO.0042802	Ec	0.424622030801632	1.19664143504555		GO.0044446	Ec	0.620348264286535	-0.898317231310709
GO.0006461	Ec	0.424728180890456	1.18719696675635		GO.0005634	Ec	0.620348264286535	-0.894596317822076
GO.0070271	Ec	0.424728180890456	1.18719696675635		GO.0071702	Ec	0.620348264286535	-0.893534103217541
GO.0010638	Ec	0.435120223750551	1.16808881806157		GO.0044422	Ec	0.620348264286535	-0.892409614535112
GO.0030054	Ec	0.436366337223802	1.15362827039072		GO.0005576	Ec	0.620348264286535	-0.892154183028033
GO.0006401	Ec	0.436366337223802	1.15239123539545		GO.0044421	Ec	0.620348264286535	-0.892154183028033
GO.0006402	Ec	0.436366337223802	1.15239123539545		GO.0070062	Ec	0.620348264286535	-0.88879607405783
GO.0031625	Ec	0.436366337223802	1.14396339375709		GO.0044444	Ec	0.620348264286535	-0.883012789417845
GO.0005874	Ec	0.436366337223802	1.14350186404569		GO.0033365	Ec	0.620348264286535	-0.867370512651667
GO.0043232	Ec	0.441323252629943	1.11490618776236		GO.0044712	Ec	0.620348264286535	-0.866025403784439
GO.0043209	Ec	0.441323252629943	1.11405057456752		GO.0019866	Ec	0.620348264286535	0.860073268621494
GO.0010941	Ec	0.441323252629943	1.1079590165017		GO.0005829	Ec	0.620348264286535	-0.856051650007706
GO.0005730	Ec	0.441323252629943	1.10425553730991		GO.0003674	Ec	0.620348264286535	-0.844545728667514
GO.0010468	Ec	0.441323252629943	1.101365787352		GO.0031981	Ec	0.620348264286535	-0.844061264611048
GO.0032774	Ec	0.441323252629943	1.10018678364363		GO.0016482	Ec	0.620348264286535	-0.841110183191999
GO.0005524	Ec	0.441323252629943	1.09872722552445		GO.0046907	Ec	0.620348264286535	-0.83622997766139
GO.0000184	Ec	0.441323252629943	1.09675356322234		GO.0005622	Ec	0.620348264286535	-0.828176996437809
GO.0000956	Ec	0.441323252629943	1.09675356322234		GO.0044424	Ec	0.620348264286535	-0.828176996437809
GO.0006351	Ec	0.441643417645613	1.09197868478411		GO.0097367	Ec	0.620348264286535	-0.824163383692135
GO.0005829	Ec	0.445150341031581	1.08271395750617		GO.0006396	Ec	0.620348264286535	-0.816496580927727
GO.0003674	Ec	0.450623073578341	1.06978731669245		GO.0006732	Ec	0.620348264286535	-0.816496580927726
GO.0044822	Ec	0.450623073578341	1.06597850761007		GO.0046496	Ec	0.620348264286535	-0.816496580927726
GO.0019058	Ec	0.450623073578341	1.05962102175883		GO.0072524	Ec	0.620348264286535	-0.816496580927726
GO.0071822	Ec	0.450623073578341	1.05790075458593		GO.0043624	Ec	0.620348264286535	-0.792918202307026
GO.0010821	Ec	0.451911311398384	1.05184741228156		GO.0044428	Ec	0.620348264286535	-0.787295821622218
GO.0005739	Ec	0.455989357793434	1.04187539658894		GO.0031967	Ec	0.620348264286535	-0.781133465884943
GO.0019899	Ec	0.458298573601102	1.02885611172024		GO.0008152	Ec	0.620348264286535	-0.780968024081567
GO.0016604	Ec	0.458298573601102	1.02385159031506		GO.0005488	Ec	0.620348264286535	-0.775750545449794
GO.0044265	Ec	0.458298573601102	1.01510803491316		GO.0022411	Ec	0.620348264286535	-0.773166203257604
GO.0019637	Ec	0.458298573601102	1.00719951700347		GO.0005856	Ec	0.620348264286535	-0.763150456659478
GO.0005515	Ec	0.458298573601102	1.0056707106716		GO.1901566	Ec	0.620348264286535	-0.761875381373062
GO.0009116	Ec	0.458298573601102	1.0053850685529		GO.0043066	Ec	0.620348264286535	-0.760582708044886
GO.0046128	Ec	0.458298573601102	1.0053850685529		GO.0006139	Ec	0.620348264286535	-0.753461314800964
GO.0072521	Ec	0.458298573601102	1.0053850685529		GO.0006725	Ec	0.620348264286535	-0.753461314800964
GO.0005615	Ec	0.464124638742107	0.989743318610787		GO.0046483	Ec	0.620348264286535	-0.753461314800964
GO.0008380	Ec	0.464124638742107	0.967935650467793		GO.1901360	Ec	0.620348264286535	-0.753461314800964
GO.0000375	Ec	0.464124638742107	0.965376524585152		GO.0097159	Ec	0.620348264286535	-0.75106321336967
GO.0051704	Ec	0.464124638742107	0.964772856314391		GO.1901363	Ec	0.620348264286535	-0.75106321336967
GO.0006397	Ec	0.464124638742107	0.963777104295413		GO.0080135	Ec	0.631786709922575	0.732814147370011
GO.0097159	Ec	0.464124638742107	0.962155498094133		GO.0003697	Ec	0.634534090252593	-0.72166559614938
GO.1901363	Ec	0.464124638742107	0.962155498094133		GO.0010467	Ec	0.634534090252593	-0.72063396028846
GO.0005737	Ec	0.464124638742107	0.961492347816644		GO.0043227	Ec	0.640069546105494	-0.709536112253588
GO.0048519	Ec	0.464124638742107	0.960825808860954		GO.0005759	Ec	0.664580496750476	0.671345086637351
GO.0019900	Ec	0.473582025732663	0.940504955978131		GO.0044429	Ec	0.664580496750476	0.671345086637351
GO.0003697	Ec	0.473582025732663	0.939323861758593		GO.0034641	Ec	0.667823811360017	-0.662722756441655
GO.0044451	Ec	0.478330991055089	0.928587879040964		GO.0016070	Ec	0.667823811360017	-0.658552774098175
GO.0000398	Ec	0.483500408341467	0.916139364010636		GO.0008104	Ec	0.673979876078413	-0.642311191894239
GO.0044430	Ec	0.483500408341467	0.913330065342309		GO.0034613	Ec	0.673979876078413	-0.642311191894239
GO.0071013	Ec	0.498994102499857	0.886187148894		GO.0044297	Ec	0.675105435850784	-0.633300496381124
GO.0005488	Ec	0.498994102499857	0.883580732381694		GO.0006412	Ec	0.675105435850784	-0.627680498361167
GO.0022411	Ec	0.510828911385533	0.863150763057116		GO.0051082	Ec	0.675105435850784	0.624977395612933
GO.0006325	Ec	0.521338637840167	0.844704459012008		GO.0044430	Ec	0.675105435850784	-0.618578615849132
GO.0044428	Ec	0.529062787069655	0.827506316955271		GO.0005874	Ec	0.675105435850784	0.617213399848368
GO.0030554	Ec	0.529062787069655	0.826151718026237		GO.0071822	Ec	0.675105435850784	-0.61443885082574
GO.0043566	Ec	0.53402994888079	0.815393158252881		GO.0043209	Ec	0.683550791231995	-0.599858038564203
GO.0031981	Ec	0.534917558559163	0.810187188855727		GO.0005654	Ec	0.716769371322279	0.555814724566606
GO.0009056	Ec	0.540167842668363	0.799066252714941		GO.0055114	Ec	0.716889820388627	0.551178254609551
GO.0043233	Ec	0.549133967427711	0.781549626524953		GO.0019538	Ec	0.741838068582048	-0.512764328704998
GO.0031974	Ec	0.549133967427711	0.776458188150309		GO.0044267	Ec	0.741838068582048	-0.512764328704998
GO.0070013	Ec	0.549133967427711	0.774958039295777		GO.0006091	Ec	0.753351499799712	0.480384461415261
GO.0044429	Ec	0.552870809618717	0.765925975064156		GO.0006414	Ec	0.753351499799712	-0.480384461415261
GO.0000785	Ec	0.554722827115609	0.758944023007054		GO.0005615	Ec	0.753351499799712	-0.476957180110299
GO.0051082	Ec	0.554722827115609	0.755467873120408		GO.0009163	Ec	0.753351499799712	0.473160223407385
GO.0060548	Ec	0.557440333062216	0.747826064380107		GO.0072594	Ec	0.753351499799712	-0.463831264827066
GO.0044248	Ec	0.560907845349033	0.739176228743874		GO.1902580	Ec	0.753351499799712	-0.463831264827066
GO.0005694	Ec	0.56348395065654	0.721572209179314		GO.0006605	Ec	0.753351499799712	-0.455513770800673
GO.0044427	Ec	0.56348395065654	0.721572209179314		GO.0051084	Ec	0.753351499799712	0.454858826147342
GO.0009892	Ec	0.56348395065654	0.714425921513345		GO.1901564	Ec	0.753351499799712	-0.452548339959391
GO.0005759	Ec	0.56348395065654	0.713725709719591		GO.0044238	Ec	0.753351499799712	-0.445822570060283
GO.0006753	Ec	0.56348395065654	0.712068994916312		GO.0006461	Ec	0.753351499799712	-0.444953369888223
GO.0009117	Ec	0.56348395065654	0.712068994916312		GO.0070271	Ec	0.753351499799712	-0.444953369888223
GO.0005654	Ec	0.57417331089486	0.692524085686282		GO.0044802	Ec	0.75812939012111	-0.43471413360133
GO.0003676	Ec	0.57417331089486	0.689691258483962		GO.0005681	Ec	0.772179501471846	-0.413301954190974
GO.0019693	Ec	0.576087245475525	0.680413817439772		GO.0003723	Ec	0.77474878518808	-0.405689131579713
GO.1901135	Ec	0.576087245475525	0.679115114870903		GO.0071704	Ec	0.776032641768498	-0.399619590974334
GO.0006366	Ec	0.576087245475525	0.675370434540111		GO.0015630	Ec	0.784877109918712	-0.384425872219245
GO.0000228	Ec	0.579527060669487	0.666784425250714		GO.0003676	Ec	0.792356221526918	-0.368135320178652
GO.0003723	Ec	0.581565494641058	0.659346877425477		GO.0044260	Ec	0.792356221526918	-0.364474043538473
GO.0044454	Ec	0.581565494641058	0.656227440369528		GO.0015629	Ec	0.792356221526918	-0.361746505338517
GO.0043624	Ec	0.582330740481355	0.644362328665822		GO.0043229	Ec	0.81409022514093	-0.330903621472946
GO.0043005	Ec	0.582330740481355	0.631915663790149		GO.0061024	Ec	0.833812248280564	-0.294457471143354
GO.0009123	Ec	0.582330740481355	0.628241121720691		GO.0043226	Ec	0.833812248280564	-0.286745650600949
GO.0009141	Ec	0.582330740481355	0.628241121720691		GO.0044237	Ec	0.833812248280564	-0.284978556170442
GO.0009150	Ec	0.582330740481355	0.628241121720691		GO.0006397	Ec	0.833812248280564	0.279751442472094
GO.0009167	Ec	0.582330740481355	0.628241121720691		GO.0008380	Ec	0.833812248280564	0.279751442472094
GO.0009205	Ec	0.582330740481355	0.628241121720691		GO.0005740	Ec	0.833812248280564	0.279145263119541
GO.0080135	Ec	0.60048627341609	0.599345687255923		GO.0044822	Ec	0.837865747129815	-0.269529970029782
GO.0044297	Ec	0.600560957743635	0.595381968461848		GO.0010638	Ec	0.839699149783508	-0.262612865719445
GO.0003677	Ec	0.616094075971098	0.570263747048917		GO.0031625	Ec	0.839780076941703	0.257841025556124
GO.0010629	Ec	0.658072182984631	0.509990192590597		GO.0006886	Ec	0.863895987266526	-0.210213826140173
GO.0019866	Ec	0.708216448962509	0.440488195921603		GO.0015031	Ec	0.863895987266526	-0.210213826140173
GO.0042981	Ec	0.741631721198218	0.393585362481356		GO.0045184	Ec	0.863895987266526	-0.210213826140173
GO.0006457	Ec	0.795759211751003	-0.321349757075468		GO.0043065	Ec	0.863895987266526	0.209274031924547
GO.0043065	Ec	0.801011982038206	-0.310316445417087		GO.0000375	Ec	0.881206550509985	0.183083459309206
GO.0031967	Ec	0.806908525350994	0.298461436574402		GO.0000398	Ec	0.945075031289121	0.0995037190209989
GO.0006091	Ec	0.825963858689202	0.27024749372597		GO.0005524	Ec	0.952519957701077	0.0852286484590707
GO.0006367	Ec	0.845057434331251	-0.241988757091231		GO.0005739	Ec	0.959017129142093	-0.070417879021953
GO.0006414	Ec	0.878450845183906	-0.196116135138184		GO.0042981	Ec	0.959017129142093	-0.0668900062090645
GO.0015629	Ec	0.909277786438986	0.153431572646928		GO.0006367	Ec	1	3.24316903706033e-16
GO.0055086	Ec	0.933682591968568	-0.118549795672764		GO.0010821	Ec	1	3.93643011710373e-16
GO.0043066	Ec	0.946982081946887	0.0971638480216896		GO.0030554	Ec	1	0
GO.0005740	Ef	1	0		GO.0006366	Ef	0.650813144011984	-2.66789187539966
GO.0005743	Ef	1	0		GO.0016604	Ef	0.650813144011984	-2.6148057867317
GO.0005759	Ef	1	0		GO.0006351	Ef	0.650813144011984	-2.59229627936314
GO.0005912	Ef	1	0		GO.0044451	Ef	0.650813144011984	-2.52810291480115
GO.0019866	Ef	1	0		GO.0060255	Ef	0.724065775138643	-2.38508690642336
GO.0031966	Ef	1	0		GO.0080090	Ef	0.724065775138643	-2.15758485668423
GO.0031967	Ef	1	-4.18096167327807e-16		GO.0010468	Ef	0.724065775138643	-2.12547572529623
GO.0044429	Ef	1	-4.88357278855351e-16		GO.0019222	Ef	0.724065775138643	-2.07076274375647
GO.0060548	Ef	0.557889718326295	-2.81376851092671		GO.0048519	Ef	0.724065775138643	-1.98679853559757
GO.0006367	Ef	0.557889718326295	-2.72554057547699		GO.0010629	Ef	0.724065775138643	-1.91236577493503
GO.0051082	Ef	0.557889718326295	-2.54950975679639		GO.0019900	Ef	0.724065775138643	-1.86771841909407
GO.0010941	Ef	0.557889718326295	-2.39818867075207		GO.0006913	Ef	0.724065775138643	-1.71058714317168
GO.0005739	Ef	0.557889718326295	-1.84519969238072		GO.0016070	Ef	0.724065775138643	-1.67115916136141
GO.0005488	Ef	0.557889718326295	1.70341921166698		GO.0006139	Ef	0.724065775138643	-1.65716062753927
GO.0006414	Ef	0.557889718326295	1.63575032974179		GO.0006725	Ef	0.724065775138643	-1.65716062753927
GO.0003677	Ef	0.557889718326295	1.62622208034119		GO.0046483	Ef	0.724065775138643	-1.65716062753927
GO.0003676	Ef	0.557889718326295	1.59819472186218		GO.1901360	Ef	0.724065775138643	-1.65716062753927
GO.0097159	Ef	0.557889718326295	1.5941092898787		GO.0006396	Ef	0.724065775138643	-1.65518054649921
GO.1901363	Ef	0.557889718326295	1.5941092898787		GO.0003676	Ef	0.724065775138643	-1.6529874993293
GO.0003723	Ef	0.557889718326295	1.59282666169095		GO.0043209	Ef	0.724065775138643	1.63411433820577
GO.0006996	Ef	0.557889718326295	1.53710173532841		GO.0003723	Ef	0.724065775138643	-1.62273127405271
GO.0071822	Ef	0.557889718326295	1.53201373007405		GO.0090304	Ef	0.724065775138643	-1.5938069928503
GO.0003674	Ef	0.557889718326295	1.52253796917552		GO.0005730	Ef	0.724065775138643	-1.57845665880594
GO.0043234	Ef	0.557889718326295	1.50146232315255		GO.0010556	Ef	0.724065775138643	-1.57845665880594
GO.1902582	Ef	0.557889718326295	1.50044171780099		GO.0009892	Ef	0.724065775138643	-1.55876619995293
GO.0006415	Ef	0.557889718326295	1.49363561491429		GO.0006397	Ef	0.724065775138643	-1.55241970783365
GO.0043624	Ef	0.557889718326295	1.49363561491429		GO.0008380	Ef	0.724065775138643	-1.55241970783365
GO.0022411	Ef	0.557889718326295	1.48555240403735		GO.0006367	Ef	0.724065775138643	-1.54919333848297
GO.0006413	Ef	0.557889718326295	1.47812248467769		GO.0000375	Ef	0.724065775138643	-1.51948475552125
GO.0006605	Ef	0.557889718326295	1.46631955346426		GO.0000398	Ef	0.724065775138643	-1.51948475552125
GO.0072594	Ef	0.557889718326295	1.46631955346426		GO.0034641	Ef	0.724065775138643	-1.51798602712489
GO.1902580	Ef	0.557889718326295	1.46631955346426		GO.0034645	Ef	0.724065775138643	-1.50346976548379
GO.0080135	Ef	0.557889718326295	-1.46184345994018		GO.1901576	Ef	0.724065775138643	-1.48928263272336
GO.0042981	Ef	0.557889718326295	-1.45474364400311		GO.0009058	Ef	0.724065775138643	-1.48400938336603
GO.0000956	Ef	0.557889718326295	1.45345676729192		GO.0043234	Ef	0.724065775138643	-1.48211730626527
GO.0006401	Ef	0.557889718326295	1.45345676729192		GO.0044429	Ef	0.724065775138643	-1.47709789175199
GO.0006402	Ef	0.557889718326295	1.45345676729192		GO.0010467	Ef	0.724065775138643	-1.4681379227179
GO.0034655	Ef	0.557889718326295	1.45345676729192		GO.0044260	Ef	0.724065775138643	-1.46400929687561
GO.0044248	Ef	0.557889718326295	1.45345676729192		GO.0044271	Ef	0.724065775138643	-1.46350812105246
GO.0044265	Ef	0.557889718326295	1.45345676729192		GO.0044249	Ef	0.724065775138643	-1.44698602135407
GO.0046907	Ef	0.557889718326295	1.45317519686879		GO.0071704	Ef	0.724065775138643	-1.43509909236469
GO.0000184	Ef	0.557889718326295	1.45143684366446		GO.0044238	Ef	0.724065775138643	-1.41920917498758
GO.0019058	Ef	0.557889718326295	1.45143684366446		GO.0008152	Ef	0.724065775138643	-1.41756455049299
GO.0019080	Ef	0.557889718326295	1.45143684366446		GO.0005759	Ef	0.724065775138643	-1.4142135623731
GO.0019083	Ef	0.557889718326295	1.45143684366446		GO.0005739	Ef	0.724065775138643	-1.4
GO.0009056	Ef	0.557889718326295	1.45090191636307		GO.0044237	Ef	0.724065775138643	-1.39661835254945
GO.1901575	Ef	0.557889718326295	1.45090191636307		GO.0016071	Ef	0.724065775138643	-1.38250817090567
GO.0071702	Ef	0.557889718326295	1.43163656470304		GO.0019901	Ef	0.724065775138643	-1.37321312465119
GO.0006614	Ef	0.557889718326295	1.42900105040789		GO.0044822	Ef	0.724065775138643	-1.37235668883981
GO.0044802	Ef	0.557889718326295	1.42900105040789		GO.0043226	Ef	0.724065775138643	-1.36918058217193
GO.0033365	Ef	0.557889718326295	1.4277160243924		GO.0043229	Ef	0.724065775138643	-1.3641899503195
GO.0005840	Ef	0.557889718326295	1.42752170113608		GO.0071705	Ef	0.724065775138643	-1.31507101127881
GO.0044391	Ef	0.557889718326295	1.42752170113608		GO.0043232	Ef	0.724065775138643	-1.25803774169839
GO.0061024	Ef	0.557889718326295	1.42186209010533		GO.0005488	Ef	0.724065775138643	-1.23454776856367
GO.0006950	Ef	0.557889718326295	-1.4131269593987		GO.0022613	Ef	0.724065775138643	-1.20677698006369
GO.0051179	Ef	0.557889718326295	1.40698502052438		GO.0003674	Ef	0.724065775138643	-1.19713032670143
GO.0033036	Ef	0.557889718326295	1.39807897485792		GO.0043227	Ef	0.724065775138643	-1.19699920012429
GO.0022626	Ef	0.557889718326295	1.38758857751625		GO.0044428	Ef	0.724065775138643	-1.19674796150062
GO.0009163	Ef	0.557889718326295	1.38493060724545		GO.1901564	Ef	0.724065775138643	-1.19286415873132
GO.0016043	Ef	0.557889718326295	1.3828943178041		GO.0043231	Ef	0.724065775138643	-1.1922419774063
GO.0016482	Ef	0.557889718326295	1.38205876952609		GO.0005634	Ef	0.724065775138643	-1.18158167965676
GO.0051704	Ef	0.557889718326295	1.38086791914738		GO.0018130	Ef	0.724065775138643	-1.16935703040132
GO.0005737	Ef	0.557889718326295	1.3763587132019		GO.0019438	Ef	0.724065775138643	-1.16935703040132
GO.0070972	Ef	0.557889718326295	1.37605905105817		GO.0034654	Ef	0.724065775138643	-1.16935703040132
GO.0006886	Ef	0.557889718326295	1.37005810846053		GO.1901362	Ef	0.724065775138643	-1.16935703040132
GO.0015031	Ef	0.557889718326295	1.37005810846053		GO.0044422	Ef	0.724065775138643	-1.16135284581761
GO.0045184	Ef	0.557889718326295	1.37005810846053		GO.0044446	Ef	0.724065775138643	-1.16135284581761
GO.0019900	Ef	0.557889718326295	1.36889512888091		GO.0055114	Ef	0.724065775138643	-1.1613026535796
GO.0019901	Ef	0.557889718326295	1.36889512888091		GO.0031981	Ef	0.724065775138643	-1.15518196451582
GO.0018130	Ef	0.557889718326295	1.3669536612484		GO.0009987	Ef	0.724065775138643	-1.15349365573084
GO.0019438	Ef	0.557889718326295	1.3669536612484		GO.0032774	Ef	0.724065775138643	-1.14907201713496
GO.0034654	Ef	0.557889718326295	1.3669536612484		GO.0097159	Ef	0.724065775138643	-1.14880616329068
GO.1901362	Ef	0.557889718326295	1.3669536612484		GO.1901363	Ef	0.724065775138643	-1.14880616329068
GO.0005515	Ef	0.557889718326295	1.3649514400914		GO.0006518	Ef	0.724065775138643	-1.144026716239
GO.0006732	Ef	0.557889718326295	1.36374473926647		GO.0006414	Ef	0.724065775138643	-1.13212585221801
GO.0032774	Ef	0.557889718326295	1.36343697744668		GO.1901566	Ef	0.724065775138643	-1.1098494041098
GO.0016032	Ef	0.557889718326295	1.357710926855		GO.0005576	Ef	0.724065775138643	-1.10916668785162
GO.0051641	Ef	0.557889718326295	1.35196455871363		GO.0044421	Ef	0.724065775138643	-1.10916668785162
GO.0051649	Ef	0.557889718326295	1.35196455871363		GO.0005622	Ef	0.724065775138643	-1.10031308603169
GO.0044445	Ef	0.557889718326295	1.33915556810931		GO.0044424	Ef	0.724065775138643	-1.10031308603169
GO.0008104	Ef	0.557889718326295	1.33071181203552		GO.0005654	Ef	0.724065775138643	-1.08388041220768
GO.0034613	Ef	0.557889718326295	1.33071181203552		GO.0019538	Ef	0.724065775138643	-1.04818187956731
GO.0006461	Ef	0.557889718326295	1.32274847429319		GO.0044267	Ef	0.724065775138643	-1.04818187956731
GO.0070271	Ef	0.557889718326295	1.32274847429319		GO.0070062	Ef	0.724065775138643	-1.03613962749583
GO.0005829	Ef	0.557889718326295	1.31998879841951		GO.0005737	Ef	0.724065775138643	-1.02973600941209
GO.0043232	Ef	0.557889718326295	1.31539154252816		GO.0030529	Ef	0.724065775138643	-1.00895290152105
GO.0051234	Ef	0.569038796101894	1.28632372771928		GO.0031982	Ef	0.724065775138643	-1.00871132243192
GO.0043933	Ef	0.569038796101894	1.27754019734796		GO.0031988	Ef	0.724065775138643	-1.00871132243192
GO.0006810	Ef	0.569038796101894	1.2627738540713		GO.0005615	Ef	0.724065775138643	1
GO.0044444	Ef	0.569038796101894	1.2475292211917		GO.0044444	Ef	0.724065775138643	-0.996008530476937
GO.0000785	Ef	0.569038796101894	1.23669388480168		GO.0042981	Ef	0.724065775138643	-0.986927542439653
GO.0005694	Ef	0.569038796101894	1.23669388480168		GO.0071013	Ef	0.724065775138643	-0.985977636021313
GO.0044427	Ef	0.569038796101894	1.23669388480168		GO.0005681	Ef	0.724065775138643	-0.975201600596089
GO.0043066	Ef	0.569038796101894	-1.23267210541998		GO.0071840	Ef	0.724065775138643	-0.97186437364187
GO.0071840	Ef	0.569038796101894	1.22686220405868		GO.0005829	Ef	0.724065775138643	-0.962205541929769
GO.0005198	Ef	0.569038796101894	1.22270594548503		GO.0043566	Ef	0.724065775138643	-0.930757841991035
GO.0044765	Ef	0.569038796101894	1.22096314422936		GO.0006412	Ef	0.724065775138643	-0.928707721075912
GO.0005576	Ef	0.569038796101894	1.20904898538188		GO.0005740	Ef	0.724065775138643	-0.925820099772551
GO.0003735	Ef	0.569038796101894	1.20205655677871		GO.0005743	Ef	0.724065775138643	-0.925820099772551
GO.0044421	Ef	0.569038796101894	1.20084437187063		GO.0019866	Ef	0.724065775138643	-0.925820099772551
GO.0065003	Ef	0.569038796101894	1.20027319294606		GO.0031966	Ef	0.724065775138643	-0.925820099772551
GO.0016071	Ef	0.569038796101894	1.19399185396506		GO.0031967	Ef	0.724065775138643	-0.925820099772551
GO.1901566	Ef	0.569038796101894	1.17631590117384		GO.0043233	Ef	0.724065775138643	-0.918459081107091
GO.0006325	Ef	0.569038796101894	1.14017542509914		GO.0031974	Ef	0.724065775138643	-0.917616940798335
GO.0031625	Ef	0.569038796101894	-1.14017542509914		GO.0032991	Ef	0.724065775138643	-0.908817239862918
GO.0030529	Ef	0.569038796101894	1.12486926019678		GO.0006753	Ef	0.724065775138643	-0.904534033733291
GO.0044822	Ef	0.569038796101894	1.12023651104079		GO.0009117	Ef	0.724065775138643	-0.904534033733291
GO.0032991	Ef	0.569038796101894	1.11933952902066		GO.0019637	Ef	0.724065775138643	-0.904534033733291
GO.0044711	Ef	0.569038796101894	1.10743627100598		GO.0019693	Ef	0.724065775138643	-0.904534033733291
GO.0006412	Ef	0.569038796101894	1.10429040645849		GO.0070013	Ef	0.724065775138643	-0.898268848480658
GO.0006518	Ef	0.569038796101894	1.10429040645849		GO.0010941	Ef	0.724065775138643	-0.898026510133874
GO.0044446	Ef	0.569038796101894	1.08616964176068		GO.0071702	Ef	0.724065775138643	-0.896292879781916
GO.1901564	Ef	0.569038796101894	1.08249301042471		GO.0010608	Ef	0.724065775138643	-0.876356092008266
GO.0044422	Ef	0.569038796101894	1.08138648954807		GO.0030554	Ef	0.724065775138643	0.870741251815432
GO.0019899	Ef	0.569038796101894	1.07629728308872		GO.0006091	Ef	0.724065775138643	-0.839181358296689
GO.0022607	Ef	0.569038796101894	1.07121838436006		GO.0016482	Ef	0.724065775138643	-0.836818529903223
GO.0043229	Ef	0.569038796101894	1.06831859955442		GO.0006457	Ef	0.724065775138643	-0.82502864732539
GO.0044451	Ef	0.569038796101894	1.06694816105487		GO.0006417	Ef	0.724065775138643	-0.82065180664829
GO.0019222	Ef	0.569038796101894	1.06137192807349		GO.0034248	Ef	0.724065775138643	-0.82065180664829
GO.0016070	Ef	0.569038796101894	1.05890476126115		GO.0033036	Ef	0.724065775138643	-0.820537898422791
GO.0000166	Ef	0.569038796101894	1.05874040027761		GO.0051179	Ef	0.724065775138643	-0.819167834331514
GO.1901265	Ef	0.569038796101894	1.05874040027761		GO.0055086	Ef	0.724065775138643	-0.816496580927726
GO.0071705	Ef	0.569038796101894	1.04625121958094		GO.1901135	Ef	0.724065775138643	-0.816496580927726
GO.0055114	Ef	0.569038796101894	1.04406039662523		GO.0005524	Ef	0.724065775138643	0.796687356371151
GO.0036094	Ef	0.569038796101894	1.04152034064857		GO.0006810	Ef	0.724065775138643	-0.776950177647818
GO.0090304	Ef	0.569038796101894	1.04144766850272		GO.0051234	Ef	0.724065775138643	-0.776950177647818
GO.0006139	Ef	0.569038796101894	1.03221556385535		GO.0005515	Ef	0.724065775138643	-0.764946309974012
GO.0006725	Ef	0.569038796101894	1.03221556385535		GO.0044085	Ef	0.724065775138643	-0.753778361444409
GO.0046483	Ef	0.569038796101894	1.03221556385535		GO.0044711	Ef	0.724065775138643	-0.730296743340221
GO.1901360	Ef	0.569038796101894	1.03221556385535		GO.0003697	Ef	0.724065775138643	-0.724285968340148
GO.0043226	Ef	0.569038796101894	1.0194549125198		GO.0003677	Ef	0.724065775138643	-0.720891836110022
GO.0031982	Ef	0.569038796101894	1.01391343963712		GO.0016043	Ef	0.724065775138643	-0.704142720721899
GO.0031988	Ef	0.569038796101894	1.01391343963712		GO.0022411	Ef	0.724065775138643	-0.703703703703704
GO.0003697	Ef	0.569038796101894	1.01094637771563		GO.0043624	Ef	0.724065775138643	-0.703703703703704
GO.0070062	Ef	0.569038796101894	1.00926373101952		GO.0000228	Ef	0.724065775138643	-0.679366220486758
GO.0043065	Ef	0.572646307158853	1		GO.0003729	Ef	0.724065775138643	-0.679366220486758
GO.0005622	Ef	0.580269598409013	0.98106913773335		GO.0044454	Ef	0.724065775138643	-0.679366220486758
GO.0044424	Ef	0.580269598409013	0.98106913773335		GO.0080135	Ef	0.724065775138643	0.679366220486757
GO.0016604	Ef	0.599951502518831	0.951489297092174		GO.0046907	Ef	0.724065775138643	-0.668119351073586
GO.0046496	Ef	0.599951502518831	0.937347688776781		GO.0017076	Ef	0.724065775138643	0.65575239092838
GO.0072524	Ef	0.599951502518831	0.937347688776781		GO.0009056	Ef	0.724065775138643	-0.637392808616861
GO.1901576	Ef	0.599951502518831	0.928598837442211		GO.1901575	Ef	0.724065775138643	-0.637392808616861
GO.0044271	Ef	0.599951502518831	0.922344040994672		GO.0031625	Ef	0.724065775138643	0.632455532033675
GO.0043566	Ef	0.599951502518831	0.921871348090964		GO.0019899	Ef	0.724065775138643	-0.620173672946042
GO.0044249	Ef	0.599951502518831	0.918531913334566		GO.0044445	Ef	0.724065775138643	-0.617332083322178
GO.0010556	Ef	0.599951502518831	0.918139224510171		GO.0006401	Ef	0.724065775138643	-0.615777684017397
GO.0006417	Ef	0.599951502518831	0.908513525158996		GO.0006402	Ef	0.724065775138643	-0.615777684017397
GO.0034248	Ef	0.599951502518831	0.908513525158996		GO.0019058	Ef	0.724065775138643	-0.615777684017397
GO.0010608	Ef	0.606753712783048	0.895806416477617		GO.0034655	Ef	0.724065775138643	-0.615777684017397
GO.0009058	Ef	0.616146140318463	0.877198159229344		GO.0044248	Ef	0.724065775138643	-0.615777684017397
GO.0017076	Ef	0.616146140318463	0.875275905015368		GO.0044265	Ef	0.724065775138643	-0.615777684017397
GO.0034645	Ef	0.61984030451073	0.866000731750367		GO.0044802	Ef	0.724065775138643	-0.615777684017397
GO.0010467	Ef	0.61984030451073	0.86129198774619		GO.0005198	Ef	0.724065775138643	-0.612599030499367
GO.0044267	Ef	0.621032111927989	0.855067460522235		GO.0006886	Ef	0.724065775138643	-0.61046113569556
GO.0005654	Ef	0.622276361429023	0.846717063566213		GO.0015031	Ef	0.724065775138643	-0.61046113569556
GO.0019538	Ef	0.622276361429023	0.843966930381074		GO.0045184	Ef	0.724065775138643	-0.61046113569556
GO.0034622	Ef	0.627792716269862	0.830686052898257		GO.0097367	Ef	0.724065775138643	0.598414470243927
GO.0044712	Ef	0.627792716269862	0.825434260906081		GO.0032550	Ef	0.724065775138643	0.592667259334222
GO.0080090	Ef	0.627792716269862	0.820102680479851		GO.0032553	Ef	0.724065775138643	0.592667259334222
GO.0010468	Ef	0.627792716269862	0.81846268156487		GO.0032555	Ef	0.724065775138643	0.592667259334222
GO.0006913	Ef	0.631797845840859	0.801783725737273		GO.0035639	Ef	0.724065775138643	0.592667259334222
GO.0034641	Ef	0.631797845840859	0.801443707372449		GO.0006605	Ef	0.724065775138643	-0.59057077642045
GO.0009987	Ef	0.631797845840859	0.799615473648587		GO.0072594	Ef	0.724065775138643	-0.59057077642045
GO.0044428	Ef	0.634066955971833	0.784743197079394		GO.1902580	Ef	0.724065775138643	-0.59057077642045
GO.0044260	Ef	0.634066955971833	0.77651901330437		GO.1902582	Ef	0.724065775138643	-0.587774686696517
GO.0043227	Ef	0.634066955971833	0.766685392483126		GO.0051641	Ef	0.724065775138643	-0.584627276193496
GO.0031981	Ef	0.634066955971833	0.763605482781085		GO.0051649	Ef	0.724065775138643	-0.584627276193496
GO.0031974	Ef	0.634066955971833	0.762853171941868		GO.0044765	Ef	0.724065775138643	-0.581387732848255
GO.0044238	Ef	0.634066955971833	0.759501033903575		GO.0070972	Ef	0.724065775138643	-0.580954593705277
GO.0044237	Ef	0.634066955971833	0.759327427796611		GO.0009123	Ef	0.724065775138643	-0.577350269189626
GO.0071704	Ef	0.634066955971833	0.755088084062854		GO.0009141	Ef	0.724065775138643	-0.577350269189626
GO.0070013	Ef	0.634066955971833	0.751314794909618		GO.0009150	Ef	0.724065775138643	-0.577350269189626
GO.0043233	Ef	0.634066955971833	0.749676540992241		GO.0009167	Ef	0.724065775138643	-0.577350269189626
GO.0060255	Ef	0.634066955971833	0.734144232467978		GO.0009205	Ef	0.724065775138643	-0.577350269189626
GO.0030554	Ef	0.634066955971833	0.725182713278206		GO.0046496	Ef	0.724065775138643	-0.577350269189626
GO.0006397	Ef	0.634066955971833	0.72353728233236		GO.0072524	Ef	0.724065775138643	-0.577350269189626
GO.0008380	Ef	0.634066955971833	0.722102713986877		GO.0000166	Ef	0.724065775138643	-0.567636882279445
GO.0006091	Ef	0.634066955971833	0.721511206057942		GO.1901265	Ef	0.724065775138643	-0.567636882279445
GO.0000375	Ef	0.634066955971833	0.719035383235973		GO.0006732	Ef	0.724065775138643	-0.565266863719196
GO.0000398	Ef	0.634066955971833	0.719035383235973		GO.0036094	Ef	0.724065775138643	-0.561951486949016
GO.0097367	Ef	0.637012300243269	0.696040264416823		GO.0016032	Ef	0.724608824028266	-0.549064687813137
GO.0044454	Ef	0.637012300243269	0.693888666488711		GO.0061024	Ef	0.724608824028266	-0.545905893935128
GO.0032550	Ef	0.637012300243269	0.688944867479223		GO.0008104	Ef	0.724608824028266	-0.541854146072063
GO.0032553	Ef	0.637012300243269	0.688944867479223		GO.0034613	Ef	0.724608824028266	-0.541854146072063
GO.0032555	Ef	0.637012300243269	0.688944867479223		GO.0051704	Ef	0.724608824028266	-0.534323739633623
GO.0035639	Ef	0.637012300243269	0.688944867479223		GO.0043933	Ef	0.724608824028266	-0.529619403845011
GO.0043209	Ef	0.647761885102572	0.663610882817663		GO.0015630	Ef	0.724608824028266	-0.528270543795375
GO.0051084	Ef	0.647761885102572	0.661214348061978		GO.0043066	Ef	0.724608824028266	-0.522232967867094
GO.0008152	Ef	0.647761885102572	0.659133635610643		GO.0033365	Ef	0.724608824028266	-0.519648384168345
GO.0043005	Ef	0.647761885102572	0.658280588604384		GO.0051082	Ef	0.728220038629675	-0.510753918455249
GO.0043231	Ef	0.656145822388695	0.643647820318931		GO.0042802	Ef	0.745767415613938	-0.475830951430886
GO.0005615	Ef	0.665676621359233	-0.627645914460848		GO.0009116	Ef	0.745767415613938	-0.471404520791031
GO.0010629	Ef	0.668206148669624	0.620173672946042		GO.0046128	Ef	0.745767415613938	-0.471404520791031
GO.0044430	Ef	0.669355302163081	0.6143842937404		GO.0072521	Ef	0.745767415613938	-0.471404520791031
GO.0048519	Ef	0.671974554956706	0.606806398055173		GO.0005856	Ef	0.751156106630978	-0.460348270118749
GO.0000228	Ef	0.678258713918017	0.594761714133181		GO.0005840	Ef	0.754537885123909	-0.44707733663858
GO.0005874	Ef	0.680251473834114	0.587944735792132		GO.0044391	Ef	0.754537885123909	-0.44707733663858
GO.0071013	Ef	0.693339292892757	0.567572048201505		GO.0006413	Ef	0.759283970301273	-0.432156327990674
GO.0006396	Ef	0.693339292892757	0.56322667504701		GO.0006415	Ef	0.759283970301273	-0.432156327990674
GO.0042802	Ef	0.69464659362092	0.556348640264187		GO.0071822	Ef	0.760054796272673	-0.426625937245657
GO.0005634	Ef	0.69464659362092	0.552835984645128		GO.0022626	Ef	0.790410268749362	-0.370969639193716
GO.0010638	Ef	0.703637237655548	-0.53748384988657		GO.0003735	Ef	0.790410268749362	-0.369276730248007
GO.0009116	Ef	0.711172768595329	0.515078753637713		GO.0000184	Ef	0.790410268749362	-0.357429096619935
GO.0046128	Ef	0.711172768595329	0.515078753637713		GO.0000956	Ef	0.790410268749362	-0.357429096619935
GO.0072521	Ef	0.711172768595329	0.515078753637713		GO.0006614	Ef	0.790410268749362	-0.357429096619935
GO.0015630	Ef	0.715664752732694	0.505187810548098		GO.0019080	Ef	0.790410268749362	-0.357429096619935
GO.0005524	Ef	0.723044054179637	0.491769772852366		GO.0019083	Ef	0.790410268749362	-0.357429096619935
GO.0044085	Ef	0.725839846593844	0.483933918495827		GO.0060548	Ef	0.795628986179368	-0.346410161513776
GO.0005856	Ef	0.729029507608708	0.471774976267294		GO.0044712	Ef	0.835987718843793	-0.29277002188456
GO.0005681	Ef	0.729029507608708	0.471188230565931		GO.0044430	Ef	0.860712024502114	-0.258198889747161
GO.0055086	Ef	0.732655404173199	0.457905469889625		GO.0006950	Ef	0.897493797157167	-0.209274031924546
GO.1901135	Ef	0.732655404173199	0.457905469889625		GO.0006461	Ef	0.903580188877797	0.191858843817324
GO.0003729	Ef	0.860968802331951	0.289604847580174		GO.0070271	Ef	0.903580188877797	0.191858843817324
GO.0006351	Ef	0.860968802331951	0.28455027346936		GO.0030054	Ef	0.946103633837576	-0.135873244097352
GO.0009123	Ef	0.860968802331951	0.267261241912425		GO.0006996	Ef	0.946794797704084	0.120385853085769
GO.0009141	Ef	0.860968802331951	0.267261241912425		GO.0005912	Ef	0.946794797704084	-0.119380825397901
GO.0009150	Ef	0.860968802331951	0.267261241912425		GO.0005925	Ef	0.946794797704084	-0.119239295027575
GO.0009167	Ef	0.860968802331951	0.267261241912425		GO.0022607	Ef	0.951694469564855	-0.108042360909843
GO.0009205	Ef	0.860968802331951	0.267261241912425		GO.0000785	Ef	1	-2.96059473233375e-16
GO.0009892	Ef	0.860968802331951	0.263840445070793		GO.0005694	Ef	1	-2.96059473233375e-16
GO.0044297	Ef	0.860968802331951	0.258863495453396		GO.0005874	Ef	1	4.48691293489498e-16
GO.0006753	Ef	0.860968802331951	0.241988757091231		GO.0034622	Ef	1	2.74643279867742e-16
GO.0009117	Ef	0.860968802331951	0.241988757091231		GO.0043065	Ef	1	0
GO.0019637	Ef	0.860968802331951	0.241988757091231		GO.0044297	Ef	1	-2.28482013499021e-16
GO.0019693	Ef	0.860968802331951	0.241988757091231		GO.0044427	Ef	1	-2.96059473233375e-16
GO.0006457	Ef	0.864179026913345	0.233277955776286		GO.0051084	Ef	1	0
GO.0030054	Ef	0.901355129759102	0.183339699405642		GO.0065003	Ef	1	2.30936011656325e-16
GO.0022613	Ef	0.921355904774162	-0.154162240330416		GO.0006325	Ef	NA	NA
GO.0005730	Ef	0.945032479235969	0.117226583510766		GO.0009163	Ef	NA	NA
GO.0006366	Ef	0.945032479235969	-0.115292816505766		GO.0010638	Ef	NA	NA
GO.0005925	Ef	0.999525553045377	-0.0439930428811687		GO.0010821	Ef	NA	NA
GO.0010821	Ef	NA	NA		GO.0015629	Ef	NA	NA
GO.0015629	Ef	NA	NA		GO.0043005	Ef	NA	NA
GO.0005634	En	0.204389588416202	3.13301877784226		GO.0071704	En	0.602674059983469	1.63411433820577
GO.0043231	En	0.204389588416202	3.12893400586035		GO.0097159	En	0.602674059983469	-1.63299316185545
GO.0008152	En	0.276633648448677	2.81016097926341		GO.1901363	En	0.602674059983469	-1.63299316185545
GO.0071704	En	0.276633648448677	2.73524839708179		GO.0030554	En	0.602674059983469	-1.59359482493633
GO.0043227	En	0.276633648448677	2.72554057547699		GO.0005524	En	0.602674059983469	-1.57725167265192
GO.0044237	En	0.276633648448677	2.69100965751279		GO.0031982	En	0.602674059983469	-1.57134840263677
GO.0044238	En	0.384692308826828	2.52538136138053		GO.0031988	En	0.602674059983469	-1.57134840263677
GO.0044260	En	0.426667700054759	2.40041036163419		GO.0097367	En	0.602674059983469	-1.51348018195628
GO.0031974	En	0.426667700054759	2.294267413758		GO.0017076	En	0.602674059983469	-1.49307511049112
GO.0043233	En	0.426667700054759	2.29038912696973		GO.0080135	En	0.602674059983469	-1.48162706071641
GO.0070013	En	0.426667700054759	2.24991060609067		GO.0032550	En	0.602674059983469	-1.47384105208415
GO.0031981	En	0.426667700054759	2.15990634871195		GO.0032553	En	0.602674059983469	-1.47384105208415
GO.0044428	En	0.426667700054759	2.15142713905115		GO.0032555	En	0.602674059983469	-1.47384105208415
GO.0043226	En	0.426667700054759	1.88208244570345		GO.0035639	En	0.602674059983469	-1.47384105208415
GO.0044422	En	0.426667700054759	1.83782429857289		GO.0043209	En	0.602674059983469	-1.46592453429156
GO.0044822	En	0.426667700054759	1.80795671491139		GO.0070062	En	0.602674059983469	-1.43345544770249
GO.0006396	En	0.426667700054759	1.76786961393181		GO.0044238	En	0.602674059983469	1.39615134519156
GO.0044446	En	0.426667700054759	1.72814538927906		GO.0071822	En	0.602674059983469	-1.35502005031714
GO.0043229	En	0.426667700054759	1.57359158493889		GO.0006457	En	0.602674059983469	-1.35314920793804
GO.0005925	En	0.426667700054759	1.56154863505222		GO.0005654	En	0.602674059983469	-1.28507920823137
GO.0005912	En	0.426667700054759	1.549434874539		GO.0061024	En	0.602674059983469	-1.28406389888597
GO.0030054	En	0.426667700054759	1.51699705008058		GO.0051082	En	0.602674059983469	-1.27676406189881
GO.0071013	En	0.426667700054759	1.46121986421113		GO.0006461	En	0.602674059983469	-1.25771787138913
GO.0009987	En	0.426667700054759	1.44714921058484		GO.0070271	En	0.602674059983469	-1.25771787138913
GO.0000398	En	0.426667700054759	1.44124003761756		GO.0042981	En	0.602674059983469	-1.24920777702038
GO.0005681	En	0.426667700054759	1.43943247383016		GO.0005488	En	0.602674059983469	-1.24882616364473
GO.0006366	En	0.426667700054759	1.43849182062036		GO.0003674	En	0.602674059983469	-1.24639872487013
GO.0009892	En	0.426667700054759	1.43531066009324		GO.0051084	En	0.602674059983469	-1.24226019228206
GO.0005654	En	0.426667700054759	1.43163609987511		GO.0005912	En	0.602674059983469	-1.24040237339132
GO.0000375	En	0.426667700054759	1.42987280723781		GO.0005856	En	0.602674059983469	-1.239384145195
GO.0008380	En	0.426667700054759	1.42987280723781		GO.0005925	En	0.602674059983469	-1.23222919604824
GO.0006397	En	0.426667700054759	1.42876581417416		GO.0055086	En	0.602674059983469	-1.22888682549324
GO.0042981	En	0.426667700054759	1.41745886739919		GO.1901135	En	0.602674059983469	-1.22824883643524
GO.0010629	En	0.426667700054759	1.40471692176127		GO.0030054	En	0.602674059983469	-1.22811370186738
GO.0044454	En	0.426667700054759	1.38981899144891		GO.0044430	En	0.602674059983469	-1.22635522050457
GO.0000228	En	0.426667700054759	1.38675796525888		GO.0005576	En	0.602674059983469	-1.22627867896993
GO.0043066	En	0.426667700054759	1.38239776941511		GO.0044421	En	0.602674059983469	-1.22627867896993
GO.0010468	En	0.426667700054759	1.38085200771748		GO.0006753	En	0.602674059983469	-1.216384278939
GO.0003677	En	0.426667700054759	1.37688398017077		GO.0009117	En	0.602674059983469	-1.216384278939
GO.0015629	En	0.426667700054759	1.37619459170352		GO.0019693	En	0.602674059983469	-1.21285320936215
GO.0006457	En	0.426667700054759	1.35095372486021		GO.0031625	En	0.602674059983469	-1.21121786256714
GO.0060548	En	0.426667700054759	1.34736775469355		GO.0006886	En	0.602674059983469	-1.20371803968886
GO.0005694	En	0.426667700054759	1.34697774406658		GO.0015031	En	0.602674059983469	-1.20371803968886
GO.0044427	En	0.426667700054759	1.34697774406658		GO.0045184	En	0.602674059983469	-1.20371803968886
GO.0010941	En	0.426667700054759	1.3390689163798		GO.0009123	En	0.602674059983469	-1.20218321906791
GO.0019538	En	0.426667700054759	1.3359402597953		GO.0009141	En	0.602674059983469	-1.20218321906791
GO.0048519	En	0.426667700054759	1.33361093272848		GO.0009150	En	0.602674059983469	-1.20218321906791
GO.0034641	En	0.426667700054759	1.32985701306682		GO.0009167	En	0.602674059983469	-1.20218321906791
GO.0043566	En	0.426667700054759	1.32836571196104		GO.0009205	En	0.602674059983469	-1.20218321906791
GO.0000785	En	0.426667700054759	1.32493630267044		GO.0009116	En	0.602674059983469	-1.20027135911989
GO.0055114	En	0.426667700054759	1.32351599396534		GO.0046128	En	0.602674059983469	-1.20027135911989
GO.0005739	En	0.426667700054759	1.32257116399279		GO.0072521	En	0.602674059983469	-1.20027135911989
GO.0060255	En	0.426667700054759	1.32063261037506		GO.0015630	En	0.602674059983469	-1.19831864235837
GO.0043005	En	0.426667700054759	1.31693821177583		GO.0019637	En	0.602674059983469	-1.19602979048301
GO.0005730	En	0.426667700054759	1.31588402736614		GO.0005759	En	0.602674059983469	-1.18085949008523
GO.0022613	En	0.426667700054759	1.31141313697437		GO.0005739	En	0.602674059983469	-1.16695209179102
GO.0044430	En	0.426667700054759	1.31127157608264		GO.0044822	En	0.602674059983469	-1.15738277320899
GO.0006351	En	0.426667700054759	1.30780067499614		GO.0006605	En	0.602674059983469	-1.15025178376701
GO.0044297	En	0.426667700054759	1.30417136515756		GO.0072594	En	0.602674059983469	-1.14273765216661
GO.0055086	En	0.426667700054759	1.29230562164352		GO.1902580	En	0.602674059983469	-1.14273765216661
GO.0043065	En	0.426667700054759	1.29035272886805		GO.0043065	En	0.602674059983469	-1.14149736806499
GO.0006367	En	0.426667700054759	1.2861081123112		GO.0044802	En	0.602674059983469	-1.1334354064281
GO.0005856	En	0.426667700054759	1.28590731195189		GO.0019899	En	0.602674059983469	-1.13127774445044
GO.0044712	En	0.426667700054759	1.28589535439337		GO.0044429	En	0.602674059983469	-1.1302771320227
GO.0019899	En	0.426667700054759	1.27692295821274		GO.0010638	En	0.602674059983469	-1.12999440971081
GO.0030554	En	0.426667700054759	1.2738087554955		GO.0044297	En	0.602674059983469	-1.12909636212628
GO.0005515	En	0.426667700054759	1.27362705018161		GO.0008104	En	0.602674059983469	-1.12120671495067
GO.0006325	En	0.426667700054759	1.26806709071146		GO.0034613	En	0.602674059983469	-1.12120671495067
GO.0031967	En	0.426667700054759	1.26367362993684		GO.0003697	En	0.602674059983469	-1.1205333347868
GO.0005615	En	0.426667700054759	1.2606628496127		GO.0005615	En	0.602674059983469	-1.11900836469339
GO.0003697	En	0.426667700054759	1.25670240293042		GO.0019866	En	0.602674059983469	-1.11855502384839
GO.0051082	En	0.426667700054759	1.25567194998555		GO.0005743	En	0.602674059983469	-1.11269728052837
GO.0046496	En	0.426667700054759	1.25410743275059		GO.0031966	En	0.602674059983469	-1.11269728052837
GO.0072524	En	0.426667700054759	1.25410743275059		GO.0043066	En	0.602674059983469	-1.11196435875787
GO.0010467	En	0.426667700054759	1.25380641627643		GO.0005740	En	0.602674059983469	-1.09635659356077
GO.0080090	En	0.426667700054759	1.25118447382529		GO.0006367	En	0.602674059983469	-1.08619630586648
GO.0006753	En	0.426667700054759	1.25060238726905		GO.0055114	En	0.602674059983469	-1.08143385040785
GO.0009117	En	0.426667700054759	1.25060238726905		GO.0033365	En	0.602674059983469	-1.08102890634916
GO.0006091	En	0.426667700054759	1.24928181724845		GO.0031967	En	0.602674059983469	-1.07683130618307
GO.0005524	En	0.426667700054759	1.24822262787695		GO.0022607	En	0.602674059983469	-1.07405010020363
GO.0080135	En	0.426667700054759	1.24700633619025		GO.0006091	En	0.602674059983469	-1.07349071974574
GO.0019900	En	0.426667700054759	1.24591706813911		GO.0006950	En	0.602674059983469	-1.07154342278553
GO.0044451	En	0.426667700054759	1.24575372040011		GO.0046496	En	0.602674059983469	-1.07056231175259
GO.0019693	En	0.426667700054759	1.24570354535755		GO.0072524	En	0.602674059983469	-1.07056231175259
GO.0010638	En	0.426667700054759	1.24054912871737		GO.0006732	En	0.602674059983469	-1.06924085399955
GO.0009123	En	0.426667700054759	1.24012178577583		GO.0065003	En	0.602674059983469	-1.0674772223163
GO.0009141	En	0.426667700054759	1.24012178577583		GO.0046907	En	0.602674059983469	-1.06730789776586
GO.0009150	En	0.426667700054759	1.24012178577583		GO.0044712	En	0.602674059983469	-1.05979805656643
GO.0009167	En	0.426667700054759	1.24012178577583		GO.0044085	En	0.602674059983469	-1.05970271188999
GO.0009205	En	0.426667700054759	1.24012178577583		GO.0044237	En	0.602674059983469	1.0580184237879
GO.0006950	En	0.426667700054759	1.23939068063615		GO.0034622	En	0.602674059983469	-1.05479039693057
GO.1901135	En	0.426667700054759	1.23902623476899		GO.0043005	En	0.602674059983469	-1.05191249559609
GO.0015630	En	0.426667700054759	1.23587974015966		GO.0010821	En	0.602674059983469	-1.04901176144671
GO.0019637	En	0.426667700054759	1.2357352694499		GO.0051649	En	0.602674059983469	-1.02426049034301
GO.0030529	En	0.426667700054759	1.23318239546289		GO.0003729	En	0.602674059983469	-1.00700919763215
GO.0051084	En	0.426667700054759	1.23257931857039		GO.0006325	En	0.602674059983469	-1.00548274094969
GO.0006732	En	0.426667700054759	1.23041198284986		GO.0044260	En	0.602674059983469	1.00261438354646
GO.0042802	En	0.426667700054759	1.22916332021422		GO.0006996	En	0.602674059983469	-0.997432094526716
GO.0010556	En	0.426667700054759	1.22760226392384		GO.0051641	En	0.602674059983469	-0.996413940207806
GO.0005740	En	0.426667700054759	1.22539244651389		GO.0042802	En	0.602674059983469	-0.992899618570998
GO.0016604	En	0.426667700054759	1.22223716689857		GO.0022411	En	0.602674059983469	-0.983481127546207
GO.0034645	En	0.426667700054759	1.21990470578735		GO.0043566	En	0.602674059983469	-0.983073026392581
GO.0005743	En	0.426667700054759	1.21918267605733		GO.0019538	En	0.602674059983469	-0.962435951127493
GO.0031966	En	0.426667700054759	1.21918267605733		GO.0044267	En	0.602674059983469	-0.962435951127493
GO.0005759	En	0.426667700054759	1.21916458537526		GO.0043624	En	0.602674059983469	-0.960292171644935
GO.0044429	En	0.426667700054759	1.21769169591997		GO.0010941	En	0.602674059983469	-0.954107959402081
GO.0010821	En	0.426667700054759	1.21750303716674		GO.0005681	En	0.602674059983469	-0.952729382902714
GO.0009116	En	0.426667700054759	1.21715909835303		GO.0044711	En	0.602674059983469	-0.947147231980431
GO.0046128	En	0.426667700054759	1.21715909835303		GO.0000785	En	0.602674059983469	-0.946448874642843
GO.0072521	En	0.426667700054759	1.21715909835303		GO.1902582	En	0.602674059983469	-0.937403070437836
GO.0019866	En	0.426667700054759	1.21280035176727		GO.0051179	En	0.602674059983469	-0.935492307634296
GO.0070062	En	0.426667700054759	1.2116185079927		GO.0005198	En	0.602674059983469	-0.929402205704821
GO.0003729	En	0.426667700054759	1.20088391882612		GO.0006810	En	0.602674059983469	-0.927200891143507
GO.0036094	En	0.426667700054759	1.19761292705499		GO.0044454	En	0.602674059983469	-0.92508727986423
GO.0031625	En	0.426667700054759	1.1964913293371		GO.0003735	En	0.602674059983469	-0.924225000179292
GO.0010608	En	0.426667700054759	1.19393089330388		GO.0016482	En	0.602674059983469	-0.918802265473941
GO.0009163	En	0.426667700054759	1.19265383578976		GO.0051234	En	0.602674059983469	-0.914437787636236
GO.0005874	En	0.426667700054759	1.19244431024434		GO.0005694	En	0.602674059983469	-0.913993642065108
GO.0044267	En	0.426667700054759	1.19109877550855		GO.0044427	En	0.602674059983469	-0.913993642065108
GO.0043209	En	0.426667700054759	1.18755575719447		GO.1901564	En	0.602674059983469	-0.911880582038993
GO.0044711	En	0.426667700054759	1.18731161562179		GO.0006417	En	0.602674059983469	-0.903440793578771
GO.0006913	En	0.426667700054759	1.18292990116424		GO.0034248	En	0.602674059983469	-0.903440793578771
GO.0031982	En	0.426667700054759	1.18014983082166		GO.0000228	En	0.602674059983469	-0.903091111854406
GO.0031988	En	0.426667700054759	1.18014983082166		GO.0000375	En	0.602674059983469	-0.89980122371774
GO.0019901	En	0.426667700054759	1.17963765533634		GO.0006397	En	0.602674059983469	-0.89980122371774
GO.0017076	En	0.426667700054759	1.16791998656838		GO.0008380	En	0.602674059983469	-0.89980122371774
GO.0090304	En	0.426667700054759	1.15911529948587		GO.0071702	En	0.602674059983469	-0.887292045307682
GO.1901576	En	0.426667700054759	1.15909511905022		GO.0060548	En	0.602674059983469	-0.886726629105932
GO.0006461	En	0.426667700054759	1.15581639360233		GO.0043933	En	0.602674059983469	-0.886258735051195
GO.0070271	En	0.426667700054759	1.15581639360233		GO.0010629	En	0.602674059983469	-0.882230841550731
GO.0071705	En	0.426667700054759	1.15227631896438		GO.0000398	En	0.602674059983469	-0.881590649076351
GO.0097367	En	0.426667700054759	1.14537793329662		GO.0000166	En	0.602674059983469	-0.879231755493698
GO.0032550	En	0.426667700054759	1.139612501149		GO.1901265	En	0.602674059983469	-0.879231755493698
GO.0032553	En	0.426667700054759	1.139612501149		GO.0005622	En	0.602674059983469	-0.87038827977849
GO.0032555	En	0.426667700054759	1.139612501149		GO.0044424	En	0.602674059983469	-0.87038827977849
GO.0035639	En	0.426667700054759	1.139612501149		GO.0036094	En	0.602674059983469	-0.866768837180666
GO.0000166	En	0.426667700054759	1.12820927655311		GO.0003677	En	0.602674059983469	-0.865160006275449
GO.1901265	En	0.426667700054759	1.12820927655311		GO.0071013	En	0.602674059983469	-0.84116540429091
GO.0006996	En	0.426667700054759	1.11762427393464		GO.0044445	En	0.602674059983469	-0.84056988942933
GO.0009058	En	0.426667700054759	1.11398964401156		GO.0000184	En	0.602674059983469	-0.832084144130771
GO.0044249	En	0.426667700054759	1.10384467852198		GO.0000956	En	0.602674059983469	-0.832084144130771
GO.0016071	En	0.426667700054759	1.09370093390544		GO.0006413	En	0.602674059983469	-0.832084144130771
GO.0019222	En	0.426667700054759	1.09160041072331		GO.0006415	En	0.602674059983469	-0.832084144130771
GO.0044271	En	0.426667700054759	1.08894706069163		GO.0006614	En	0.602674059983469	-0.832084144130771
GO.0051704	En	0.426667700054759	1.0873005785362		GO.0019080	En	0.602674059983469	-0.832084144130771
GO.0005622	En	0.426667700054759	1.08589655703791		GO.0019083	En	0.602674059983469	-0.832084144130771
GO.0044424	En	0.426667700054759	1.08589655703791		GO.0034655	En	0.602674059983469	-0.8296377500914
GO.0003723	En	0.426667700054759	1.07570574840095		GO.0005874	En	0.602674059983469	-0.82958208083776
GO.0006417	En	0.426667700054759	1.07286252766425		GO.0005840	En	0.602674059983469	-0.829031022032321
GO.0034248	En	0.426667700054759	1.07286252766425		GO.0022626	En	0.602674059983469	-0.829031022032321
GO.0044085	En	0.426667700054759	1.07201775408043		GO.0044391	En	0.602674059983469	-0.829031022032321
GO.0034622	En	0.426667700054759	1.06901886250171		GO.0006401	En	0.602674059983469	-0.827893194786952
GO.0006139	En	0.426667700054759	1.0652863274812		GO.0006402	En	0.602674059983469	-0.827893194786952
GO.0006725	En	0.426667700054759	1.0652863274812		GO.0044248	En	0.602674059983469	-0.824666317826724
GO.0046483	En	0.426667700054759	1.0652863274812		GO.0010608	En	0.602674059983469	-0.822405435514109
GO.1901360	En	0.426667700054759	1.0652863274812		GO.1901566	En	0.602674059983469	-0.820303112429596
GO.0043234	En	0.426667700054759	1.06115898713799		GO.0003723	En	0.602674059983469	-0.820224895207732
GO.0016070	En	0.426667700054759	1.02377297116375		GO.0044265	En	0.602674059983469	-0.815598048047494
GO.0043624	En	0.426667700054759	1.0208070901986		GO.0005730	En	0.602674059983469	-0.81474496656002
GO.0022607	En	0.426667700054759	1.01915738482491		GO.0019901	En	0.602674059983469	-0.812804505515298
GO.0003674	En	0.426667700054759	1.0188082212199		GO.0033036	En	0.602674059983469	-0.811214480907068
GO.0065003	En	0.426667700054759	1.01325873983817		GO.0006412	En	0.602674059983469	-0.802652868242585
GO.0044248	En	0.426667700054759	1.00819939835978		GO.0051704	En	0.602674059983469	-0.798181393376365
GO.0005198	En	0.426667700054759	1.0025309885208		GO.0070972	En	0.602674059983469	-0.788874950353738
GO.0009056	En	0.426667700054759	1.0012565449983		GO.0048519	En	0.602674059983469	-0.782701175262028
GO.0003735	En	0.426667700054759	0.997338764218793		GO.0019900	En	0.602674059983469	-0.78203567624097
GO.0044765	En	0.426667700054759	0.996608750468751		GO.0044451	En	0.602674059983469	-0.780082888210542
GO.0022411	En	0.426667700054759	0.996304827859297		GO.0016604	En	0.602674059983469	-0.777710007083652
GO.0006518	En	0.426667700054759	0.989132901143778		GO.0009056	En	0.602674059983469	-0.772406652553897
GO.0006412	En	0.426667700054759	0.981369867440536		GO.0009163	En	0.602674059983469	-0.77129191613242
GO.0044265	En	0.426667700054759	0.969877276232745		GO.0044765	En	0.602674059983469	-0.768305251973382
GO.0019058	En	0.426667700054759	0.96349530407045		GO.0016043	En	0.604234555860231	-0.762026156524404
GO.1901564	En	0.426667700054759	0.963400835167925		GO.0003676	En	0.608910993012593	-0.749816961559202
GO.0070972	En	0.426667700054759	0.962540167671423		GO.0071840	En	0.608910993012593	-0.745441562328867
GO.0000184	En	0.426667700054759	0.96245521615473		GO.0006518	En	0.608910993012593	-0.743239681794386
GO.0000956	En	0.426667700054759	0.961100900281372		GO.0006351	En	0.610024535187435	-0.733472947953656
GO.0043232	En	0.426667700054759	0.958467676597046		GO.1901575	En	0.610024535187435	-0.733244700570518
GO.0016032	En	0.426667700054759	0.955423906842604		GO.0006414	En	0.610450944998255	-0.728425623833706
GO.0006401	En	0.426667700054759	0.950662132175406		GO.0006366	En	0.610892682409062	-0.723598269547586
GO.0006402	En	0.426667700054759	0.950662132175406		GO.0006913	En	0.611335691974076	-0.715032887144035
GO.0003676	En	0.426667700054759	0.947825924808896		GO.0016032	En	0.611335691974076	-0.714528792636901
GO.0005576	En	0.426667700054759	0.936661657701717		GO.0010556	En	0.611758225166681	-0.709758248225647
GO.0044421	En	0.426667700054759	0.936661657701717		GO.0044444	En	0.622720290826913	-0.690289207236524
GO.0005840	En	0.426667700054759	0.935495992014967		GO.0005829	En	0.622720290826913	-0.687509134695234
GO.0032774	En	0.426667700054759	0.934918434056084		GO.0031981	En	0.623191767039343	-0.674219814812648
GO.0044445	En	0.426667700054759	0.930994384729974		GO.0071705	En	0.623191767039343	-0.672979347602921
GO.0022626	En	0.426667700054759	0.929392518810897		GO.0043234	En	0.623191767039343	-0.671823347508063
GO.0044391	En	0.426667700054759	0.929392518810897		GO.0044428	En	0.623191767039343	-0.670039136391779
GO.0006614	En	0.426667700054759	0.928669957866946		GO.0019058	En	0.627041315858327	-0.660972296258073
GO.0034655	En	0.426667700054759	0.927094940664367		GO.0022613	En	0.636950747237032	-0.644267638443946
GO.0006413	En	0.426667700054759	0.926815769307436		GO.0009892	En	0.647604962432787	-0.626679561440513
GO.0006415	En	0.426667700054759	0.924451641771528		GO.0005515	En	0.660197740124773	-0.606736785645814
GO.0019080	En	0.426667700054759	0.924451641771528		GO.0015629	En	0.6694852493807	-0.590952632079626
GO.0019083	En	0.426667700054759	0.924451641771528		GO.0043229	En	0.670397027399377	-0.58554004376912
GO.0071822	En	0.428273431005295	0.918367953951778		GO.0043226	En	0.679906427089039	-0.569494797451499
GO.1901575	En	0.431552936043869	0.909619766245682		GO.0044422	En	0.68328133003607	-0.561029498654621
GO.1901566	En	0.434176453474368	0.901931237640494		GO.0044446	En	0.688483065781717	-0.550308201573666
GO.0044444	En	0.435668626614492	0.896052280738175		GO.0070013	En	0.700297882828059	-0.531165600189535
GO.0005829	En	0.45356740760589	0.839200877576045		GO.0043232	En	0.700297882828059	-0.527122544154314
GO.0006414	En	0.45356740760589	0.839095388555106		GO.0030529	En	0.707186593776302	-0.513902748505775
GO.1902580	En	0.45356740760589	0.83807634868119		GO.0043233	En	0.707186593776302	-0.509984594448061
GO.0008104	En	0.45356740760589	0.834669963684495		GO.0006396	En	0.707695718954933	-0.505028558301952
GO.0033365	En	0.45356740760589	0.830162354648407		GO.0080090	En	0.710420377436667	-0.497339101210957
GO.0018130	En	0.45356740760589	0.819794396778163		GO.0008152	En	0.740060763650225	0.456611660488657
GO.0019438	En	0.45356740760589	0.819794396778163		GO.0060255	En	0.753707391942341	-0.435591535667518
GO.0034654	En	0.45356740760589	0.819794396778163		GO.0031974	En	0.771059019352082	-0.410132391597531
GO.1901362	En	0.45356740760589	0.819794396778163		GO.0019222	En	0.787305829445641	-0.386060368654495
GO.0034613	En	0.45356740760589	0.815970597361675		GO.0016071	En	0.788206747713856	-0.380417928454267
GO.0015031	En	0.45356740760589	0.815714242255058		GO.0005737	En	0.797105993025478	-0.36514837167011
GO.0045184	En	0.45356740760589	0.815714242255058		GO.0009987	En	0.799823673512811	-0.357294800505249
GO.0072594	En	0.45356740760589	0.8152845675304		GO.0034641	En	0.809543274844706	0.340997169735237
GO.0006605	En	0.45356740760589	0.814030739505682		GO.0010468	En	0.813117179704778	-0.332075909544886
GO.0061024	En	0.45356740760589	0.813604270807782		GO.0032991	En	0.852876490425776	-0.279751442472094
GO.0044802	En	0.45356740760589	0.812366741645036		GO.0044271	En	0.876261390214539	-0.232962135944706
GO.0071840	En	0.457981515793167	0.801917003727803		GO.0034645	En	0.876261390214539	-0.227729541996024
GO.0006886	En	0.458808503160714	0.797202895564788		GO.0032774	En	0.876261390214539	-0.226199090496833
GO.0097159	En	0.466645617634968	0.771822240517268		GO.1901576	En	0.876261390214539	-0.212110824333979
GO.1901363	En	0.466645617634968	0.771822240517268		GO.0018130	En	0.876261390214539	-0.210407621257926
GO.0051641	En	0.466645617634968	0.769518034860939		GO.0019438	En	0.876261390214539	-0.210407621257926
GO.0051649	En	0.466645617634968	0.769518034860939		GO.0034654	En	0.876261390214539	-0.210407621257926
GO.1902582	En	0.466645617634968	0.767789309231397		GO.1901362	En	0.876261390214539	-0.210407621257926
GO.0016043	En	0.469820417683909	0.759355284509219		GO.0005634	En	0.876261390214539	-0.208430521712477
GO.0043933	En	0.473700011111191	0.749809346902485		GO.0006139	En	0.889437880073834	0.172917125311271
GO.0051179	En	0.474380193642849	0.745102970125092		GO.0006725	En	0.889437880073834	0.172917125311271
GO.0006810	En	0.474380193642849	0.740585682608482		GO.0046483	En	0.889437880073834	0.172917125311271
GO.0051234	En	0.474380193642849	0.738635390355003		GO.1901360	En	0.889437880073834	0.172917125311271
GO.0005737	En	0.475140908939205	0.734070911851807		GO.0009058	En	0.915743303447937	-0.131201747813295
GO.0016482	En	0.522416813991518	0.65674137403059		GO.0044249	En	0.915743303447937	-0.130599473056375
GO.0033036	En	0.522416813991518	0.65347781835107		GO.0090304	En	0.940194823138451	0.0953282060494705
GO.0071702	En	0.538946957829215	0.622783472236023		GO.0043231	En	0.959017129142092	0.0668900062090651
GO.0046907	En	0.538946957829215	0.621423819675213		GO.0010467	En	0.963993240626403	-0.0555269996268855
GO.0005488	En	0.552176185579193	0.598050360401732		GO.0016070	En	0.967861430838488	-0.0455015755193293
GO.0032991	En	0.754589180781492	0.312593942584417		GO.0043227	En	1	0
GO.0000166	N	0.119081445602777	1.55864069463		GO.0000166	N	0.0485489573882645	-1.97253155823837
GO.0000184	N	0.119081445602777	1.55864069463		GO.0000184	N	0.0485489573882645	-1.97253155823837
GO.0000228	N	0.119081445602777	1.55864069463		GO.0000228	N	0.0485489573882645	-1.97253155823837
GO.0000375	N	0.119081445602777	1.55864069463		GO.0000375	N	0.0485489573882645	-1.97253155823837
GO.0000398	N	0.119081445602777	1.55864069463		GO.0000398	N	0.0485489573882645	-1.97253155823837
GO.0000785	N	0.119081445602777	1.55864069463		GO.0000785	N	0.0485489573882645	-1.97253155823837
GO.0000956	N	0.119081445602777	1.55864069463		GO.0000956	N	0.0485489573882645	-1.97253155823837
GO.0003674	N	0.119081445602777	1.55864069463		GO.0003674	N	0.0485489573882645	-1.97253155823837
GO.0003676	N	0.119081445602777	1.55864069463		GO.0003676	N	0.0485489573882645	-1.97253155823837
GO.0003677	N	0.119081445602777	1.55864069463		GO.0003677	N	0.0485489573882645	-1.97253155823837
GO.0003697	N	0.119081445602777	1.55864069463		GO.0003697	N	0.0485489573882645	-1.97253155823837
GO.0003723	N	0.119081445602777	1.55864069463		GO.0003723	N	0.0485489573882645	-1.97253155823837
GO.0003729	N	0.119081445602777	1.55864069463		GO.0003729	N	0.0485489573882645	-1.97253155823837
GO.0003735	N	0.119081445602777	1.55864069463		GO.0003735	N	0.0485489573882645	-1.97253155823837
GO.0005198	N	0.119081445602777	1.55864069463		GO.0005198	N	0.0485489573882645	-1.97253155823837
GO.0005488	N	0.119081445602777	1.55864069463		GO.0005488	N	0.0485489573882645	-1.97253155823837
GO.0005515	N	0.119081445602777	1.55864069463		GO.0005515	N	0.0485489573882645	-1.97253155823837
GO.0005524	N	0.119081445602777	1.55864069463		GO.0005524	N	0.0485489573882645	-1.97253155823837
GO.0005576	N	0.119081445602777	1.55864069463		GO.0005576	N	0.0485489573882645	-1.97253155823837
GO.0005615	N	0.119081445602777	1.55864069463		GO.0005615	N	0.0485489573882645	-1.97253155823837
GO.0005622	N	0.119081445602777	1.55864069463		GO.0005622	N	0.0485489573882645	-1.97253155823837
GO.0005634	N	0.119081445602777	1.55864069463		GO.0005634	N	0.0485489573882645	-1.97253155823837
GO.0005654	N	0.119081445602777	1.55864069463		GO.0005654	N	0.0485489573882645	-1.97253155823837
GO.0005681	N	0.119081445602777	1.55864069463		GO.0005681	N	0.0485489573882645	-1.97253155823837
GO.0005694	N	0.119081445602777	1.55864069463		GO.0005694	N	0.0485489573882645	-1.97253155823837
GO.0005730	N	0.119081445602777	1.55864069463		GO.0005730	N	0.0485489573882645	-1.97253155823837
GO.0005737	N	0.119081445602777	1.55864069463		GO.0005737	N	0.0485489573882645	-1.97253155823837
GO.0005739	N	0.119081445602777	1.55864069463		GO.0005739	N	0.0485489573882645	-1.97253155823837
GO.0005740	N	0.119081445602777	1.55864069463		GO.0005740	N	0.0485489573882645	-1.97253155823837
GO.0005743	N	0.119081445602777	1.55864069463		GO.0005743	N	0.0485489573882645	-1.97253155823837
GO.0005759	N	0.119081445602777	1.55864069463		GO.0005759	N	0.0485489573882645	-1.97253155823837
GO.0005829	N	0.119081445602777	1.55864069463		GO.0005829	N	0.0485489573882645	-1.97253155823837
GO.0005840	N	0.119081445602777	1.55864069463		GO.0005840	N	0.0485489573882645	-1.97253155823837
GO.0005856	N	0.119081445602777	1.55864069463		GO.0005856	N	0.0485489573882645	-1.97253155823837
GO.0005874	N	0.119081445602777	1.55864069463		GO.0005874	N	0.0485489573882645	-1.97253155823837
GO.0005912	N	0.119081445602777	1.55864069463		GO.0005912	N	0.0485489573882645	-1.97253155823837
GO.0005925	N	0.119081445602777	1.55864069463		GO.0005925	N	0.0485489573882645	-1.97253155823837
GO.0006091	N	0.119081445602777	1.55864069463		GO.0006091	N	0.0485489573882645	-1.97253155823837
GO.0006139	N	0.119081445602777	1.55864069463		GO.0006139	N	0.0485489573882645	-1.97253155823837
GO.0006325	N	0.119081445602777	1.55864069463		GO.0006325	N	0.0485489573882645	-1.97253155823837
GO.0006351	N	0.119081445602777	1.55864069463		GO.0006351	N	0.0485489573882645	-1.97253155823837
GO.0006366	N	0.119081445602777	1.55864069463		GO.0006366	N	0.0485489573882645	-1.97253155823837
GO.0006367	N	0.119081445602777	1.55864069463		GO.0006367	N	0.0485489573882645	-1.97253155823837
GO.0006396	N	0.119081445602777	1.55864069463		GO.0006396	N	0.0485489573882645	-1.97253155823837
GO.0006397	N	0.119081445602777	1.55864069463		GO.0006397	N	0.0485489573882645	-1.97253155823837
GO.0006401	N	0.119081445602777	1.55864069463		GO.0006401	N	0.0485489573882645	-1.97253155823837
GO.0006402	N	0.119081445602777	1.55864069463		GO.0006402	N	0.0485489573882645	-1.97253155823837
GO.0006412	N	0.119081445602777	1.55864069463		GO.0006412	N	0.0485489573882645	-1.97253155823837
GO.0006413	N	0.119081445602777	1.55864069463		GO.0006413	N	0.0485489573882645	-1.97253155823837
GO.0006414	N	0.119081445602777	1.55864069463		GO.0006414	N	0.0485489573882645	-1.97253155823837
GO.0006415	N	0.119081445602777	1.55864069463		GO.0006415	N	0.0485489573882645	-1.97253155823837
GO.0006417	N	0.119081445602777	1.55864069463		GO.0006417	N	0.0485489573882645	-1.97253155823837
GO.0006457	N	0.119081445602777	1.55864069463		GO.0006457	N	0.0485489573882645	-1.97253155823837
GO.0006461	N	0.119081445602777	1.55864069463		GO.0006461	N	0.0485489573882645	-1.97253155823837
GO.0006518	N	0.119081445602777	1.55864069463		GO.0006518	N	0.0485489573882645	-1.97253155823837
GO.0006605	N	0.119081445602777	1.55864069463		GO.0006605	N	0.0485489573882645	-1.97253155823837
GO.0006614	N	0.119081445602777	1.55864069463		GO.0006614	N	0.0485489573882645	-1.97253155823837
GO.0006725	N	0.119081445602777	1.55864069463		GO.0006725	N	0.0485489573882645	-1.97253155823837
GO.0006732	N	0.119081445602777	1.55864069463		GO.0006732	N	0.0485489573882645	-1.97253155823837
GO.0006753	N	0.119081445602777	1.55864069463		GO.0006753	N	0.0485489573882645	-1.97253155823837
GO.0006810	N	0.119081445602777	1.55864069463		GO.0006810	N	0.0485489573882645	-1.97253155823837
GO.0006886	N	0.119081445602777	1.55864069463		GO.0006886	N	0.0485489573882645	-1.97253155823837
GO.0006913	N	0.119081445602777	1.55864069463		GO.0006913	N	0.0485489573882645	-1.97253155823837
GO.0006950	N	0.119081445602777	1.55864069463		GO.0006950	N	0.0485489573882645	-1.97253155823837
GO.0006996	N	0.119081445602777	1.55864069463		GO.0006996	N	0.0485489573882645	-1.97253155823837
GO.0008104	N	0.119081445602777	1.55864069463		GO.0008104	N	0.0485489573882645	-1.97253155823837
GO.0008152	N	0.119081445602777	1.55864069463		GO.0008152	N	0.0485489573882645	-1.97253155823837
GO.0008380	N	0.119081445602777	1.55864069463		GO.0008380	N	0.0485489573882645	-1.97253155823837
GO.0009056	N	0.119081445602777	1.55864069463		GO.0009056	N	0.0485489573882645	-1.97253155823837
GO.0009058	N	0.119081445602777	1.55864069463		GO.0009058	N	0.0485489573882645	-1.97253155823837
GO.0009116	N	0.119081445602777	1.55864069463		GO.0009116	N	0.0485489573882645	-1.97253155823837
GO.0009117	N	0.119081445602777	1.55864069463		GO.0009117	N	0.0485489573882645	-1.97253155823837
GO.0009123	N	0.119081445602777	1.55864069463		GO.0009123	N	0.0485489573882645	-1.97253155823837
GO.0009141	N	0.119081445602777	1.55864069463		GO.0009141	N	0.0485489573882645	-1.97253155823837
GO.0009150	N	0.119081445602777	1.55864069463		GO.0009150	N	0.0485489573882645	-1.97253155823837
GO.0009163	N	0.119081445602777	1.55864069463		GO.0009163	N	0.0485489573882645	-1.97253155823837
GO.0009167	N	0.119081445602777	1.55864069463		GO.0009167	N	0.0485489573882645	-1.97253155823837
GO.0009205	N	0.119081445602777	1.55864069463		GO.0009205	N	0.0485489573882645	-1.97253155823837
GO.0009892	N	0.119081445602777	1.55864069463		GO.0009892	N	0.0485489573882645	-1.97253155823837
GO.0009987	N	0.119081445602777	1.55864069463		GO.0009987	N	0.0485489573882645	-1.97253155823837
GO.0010467	N	0.119081445602777	1.55864069463		GO.0010467	N	0.0485489573882645	-1.97253155823837
GO.0010468	N	0.119081445602777	1.55864069463		GO.0010468	N	0.0485489573882645	-1.97253155823837
GO.0010556	N	0.119081445602777	1.55864069463		GO.0010556	N	0.0485489573882645	-1.97253155823837
GO.0010608	N	0.119081445602777	1.55864069463		GO.0010608	N	0.0485489573882645	-1.97253155823837
GO.0010629	N	0.119081445602777	1.55864069463		GO.0010629	N	0.0485489573882645	-1.97253155823837
GO.0010638	N	0.119081445602777	1.55864069463		GO.0010638	N	0.0485489573882645	-1.97253155823837
GO.0010821	N	0.119081445602777	1.55864069463		GO.0010821	N	0.0485489573882645	-1.97253155823837
GO.0010941	N	0.119081445602777	1.55864069463		GO.0010941	N	0.0485489573882645	-1.97253155823837
GO.0015031	N	0.119081445602777	1.55864069463		GO.0015031	N	0.0485489573882645	-1.97253155823837
GO.0015629	N	0.119081445602777	1.55864069463		GO.0015629	N	0.0485489573882645	-1.97253155823837
GO.0015630	N	0.119081445602777	1.55864069463		GO.0015630	N	0.0485489573882645	-1.97253155823837
GO.0016032	N	0.119081445602777	1.55864069463		GO.0016032	N	0.0485489573882645	-1.97253155823837
GO.0016043	N	0.119081445602777	1.55864069463		GO.0016043	N	0.0485489573882645	-1.97253155823837
GO.0016070	N	0.119081445602777	1.55864069463		GO.0016070	N	0.0485489573882645	-1.97253155823837
GO.0016071	N	0.119081445602777	1.55864069463		GO.0016071	N	0.0485489573882645	-1.97253155823837
GO.0016482	N	0.119081445602777	1.55864069463		GO.0016482	N	0.0485489573882645	-1.97253155823837
GO.0016604	N	0.119081445602777	1.55864069463		GO.0016604	N	0.0485489573882645	-1.97253155823837
GO.0017076	N	0.119081445602777	1.55864069463		GO.0017076	N	0.0485489573882645	-1.97253155823837
GO.0018130	N	0.119081445602777	1.55864069463		GO.0018130	N	0.0485489573882645	-1.97253155823837
GO.0019058	N	0.119081445602777	1.55864069463		GO.0019058	N	0.0485489573882645	-1.97253155823837
GO.0019080	N	0.119081445602777	1.55864069463		GO.0019080	N	0.0485489573882645	-1.97253155823837
GO.0019083	N	0.119081445602777	1.55864069463		GO.0019083	N	0.0485489573882645	-1.97253155823837
GO.0019222	N	0.119081445602777	1.55864069463		GO.0019222	N	0.0485489573882645	-1.97253155823837
GO.0019438	N	0.119081445602777	1.55864069463		GO.0019438	N	0.0485489573882645	-1.97253155823837
GO.0019538	N	0.119081445602777	1.55864069463		GO.0019538	N	0.0485489573882645	-1.97253155823837
GO.0019637	N	0.119081445602777	1.55864069463		GO.0019637	N	0.0485489573882645	-1.97253155823837
GO.0019693	N	0.119081445602777	1.55864069463		GO.0019693	N	0.0485489573882645	-1.97253155823837
GO.0019866	N	0.119081445602777	1.55864069463		GO.0019866	N	0.0485489573882645	-1.97253155823837
GO.0019899	N	0.119081445602777	1.55864069463		GO.0019899	N	0.0485489573882645	-1.97253155823837
GO.0019900	N	0.119081445602777	1.55864069463		GO.0019900	N	0.0485489573882645	-1.97253155823837
GO.0019901	N	0.119081445602777	1.55864069463		GO.0019901	N	0.0485489573882645	-1.97253155823837
GO.0022411	N	0.119081445602777	1.55864069463		GO.0022411	N	0.0485489573882645	-1.97253155823837
GO.0022607	N	0.119081445602777	1.55864069463		GO.0022607	N	0.0485489573882645	-1.97253155823837
GO.0022613	N	0.119081445602777	1.55864069463		GO.0022613	N	0.0485489573882645	-1.97253155823837
GO.0022626	N	0.119081445602777	1.55864069463		GO.0022626	N	0.0485489573882645	-1.97253155823837
GO.0030054	N	0.119081445602777	1.55864069463		GO.0030054	N	0.0485489573882645	-1.97253155823837
GO.0030529	N	0.119081445602777	1.55864069463		GO.0030529	N	0.0485489573882645	-1.97253155823837
GO.0030554	N	0.119081445602777	1.55864069463		GO.0030554	N	0.0485489573882645	-1.97253155823837
GO.0031625	N	0.119081445602777	1.55864069463		GO.0031625	N	0.0485489573882645	-1.97253155823837
GO.0031966	N	0.119081445602777	1.55864069463		GO.0031966	N	0.0485489573882645	-1.97253155823837
GO.0031967	N	0.119081445602777	1.55864069463		GO.0031967	N	0.0485489573882645	-1.97253155823837
GO.0031974	N	0.119081445602777	1.55864069463		GO.0031974	N	0.0485489573882645	-1.97253155823837
GO.0031981	N	0.119081445602777	1.55864069463		GO.0031981	N	0.0485489573882645	-1.97253155823837
GO.0031982	N	0.119081445602777	1.55864069463		GO.0031982	N	0.0485489573882645	-1.97253155823837
GO.0031988	N	0.119081445602777	1.55864069463		GO.0031988	N	0.0485489573882645	-1.97253155823837
GO.0032550	N	0.119081445602777	1.55864069463		GO.0032550	N	0.0485489573882645	-1.97253155823837
GO.0032553	N	0.119081445602777	1.55864069463		GO.0032553	N	0.0485489573882645	-1.97253155823837
GO.0032555	N	0.119081445602777	1.55864069463		GO.0032555	N	0.0485489573882645	-1.97253155823837
GO.0032774	N	0.119081445602777	1.55864069463		GO.0032774	N	0.0485489573882645	-1.97253155823837
GO.0032991	N	0.119081445602777	1.55864069463		GO.0032991	N	0.0485489573882645	-1.97253155823837
GO.0033036	N	0.119081445602777	1.55864069463		GO.0033036	N	0.0485489573882645	-1.97253155823837
GO.0033365	N	0.119081445602777	1.55864069463		GO.0033365	N	0.0485489573882645	-1.97253155823837
GO.0034248	N	0.119081445602777	1.55864069463		GO.0034248	N	0.0485489573882645	-1.97253155823837
GO.0034613	N	0.119081445602777	1.55864069463		GO.0034613	N	0.0485489573882645	-1.97253155823837
GO.0034622	N	0.119081445602777	1.55864069463		GO.0034622	N	0.0485489573882645	-1.97253155823837
[truncated: 2,661 more rows]

## Sheet: explanation
N	number of nodes in the whole network
Nf	number of nodes in the non-functional sub-network
Nn	number of nodes in the functional sub-network
E	Number of interactions in the network generated from STRING with combined score 0.95
Ec	Number of interactions between the functional and non-functional proteins
Ef	Number of interactions between the functional proteins
En	Number of interactions between the non-functional proteins
D	edge-weight density in the whole network
Dc	cross edge-weight density
Df	edge-weight density in the functional sub-network
Dn	edge-weight density in the non functional sub-network
S	interaction density of the proteins in the sample
Sc	interaction density of the cross-functional proteins in the sample
Sf	interaction density of the functional proteins in the sample
Sn	interaction density of the non-functional proteins in the sample
R	edge-weight ratio
Rc	cross edge ratio
Rf	edge ratio in the functional sub-network
Rn	edge ratio in the non-functional sub-network
NA	not applicable
