# Supplementary material for: Analysis of networks of host proteins in the early time points following HIV transduction
Source: BMC Bioinformatics. 2019 Jul 17;20:398. doi: 10.1186/s12859-019-2990-3 (PMC6637640; doi:10.1186/s12859-019-2990-3)
Supplement: Supplementary file 6 — List of GO terms with network parameters that were significantly changed in the functional sub-networks. (XLSX 16 kb) [file 12859_2019_2990_MOESM6_ESM.xlsx]

## Sheet: Density_H04
Df	Dc	Dn	D
GO.0000184	NS	NS	GO.0000184
GO.0000228	NS	NS	GO.0000228
GO.0000375	NS	NS	GO.0000375
GO.0000398	NS	NS	GO.0000398
GO.0000956	NS	NS	GO.0000956
GO.0003735	NS	NS	GO.0003735
GO.0005198	NS	NS	GO.0005198
GO.0005515	NS	NS	GO.0005515
GO.0005524	GO.0005524	NS	GO.0005524
GO.0005622	NS	NS	GO.0005622
GO.0005737	NS	NS	GO.0005737
GO.0005739	NS	NS	GO.0005739
GO.0005840	NS	NS	GO.0005840
GO.0006351	GO.0006351	NS	GO.0006351
GO.0006366	GO.0006366	NS	GO.0006366
GO.0006367	NS	NS	GO.0006367
GO.0006396	NS	NS	GO.0006396
GO.0006397	NS	NS	GO.0006397
GO.0006401	NS	NS	GO.0006401
GO.0006402	NS	NS	GO.0006402
GO.0006412	NS	NS	GO.0006412
GO.0006413	GO.0006413	NS	GO.0006413
GO.0006414	GO.0006414	NS	GO.0006414
GO.0006415	NS	NS	GO.0006415
GO.0006417	GO.0006417	NS	GO.0006417
GO.0006518	NS	NS	GO.0006518
GO.0006605	NS	NS	GO.0006605
GO.0006614	NS	NS	GO.0006614
GO.0006732	GO.0006732	NS	GO.0006732
GO.0006886	NS	NS	GO.0006886
GO.0008152	NS	NS	GO.0008152
GO.0008380	NS	NS	GO.0008380
GO.0009056	NS	NS	GO.0009056
GO.0009892	NS	NS	GO.0009892
GO.0009987	NS	NS	GO.0009987
GO.0010468	GO.0010608	NS	GO.0010468
GO.0010556	NS	NS	GO.0010556
GO.0010608	NS	NS	GO.0010608
GO.0010941	NS	NS	GO.0010941
GO.0015031	NS	NS	GO.0015031
GO.0016032	NS	NS	GO.0016032
GO.0016043	NS	NS	GO.0016043
GO.0016070	GO.0016070	NS	GO.0016070
GO.0016071	NS	NS	GO.0016071
GO.0016482	NS	NS	GO.0016482
GO.0016604	GO.0016604	NS	GO.0016604
GO.0017076	GO.0017076	NS	GO.0017076
GO.0018130	GO.0018130	NS	GO.0018130
GO.0019058	NS	NS	GO.0019058
GO.0019080	NS	NS	GO.0019080
GO.0019083	NS	NS	GO.0019083
GO.0019222	NS	NS	GO.0019222
GO.0019438	GO.0019438	NS	GO.0019438
GO.0019538	NS	NS	GO.0019538
GO.0019899	NS	NS	GO.0019899
GO.0019900	GO.0019900	NS	GO.0019900
GO.0019901	NS	NS	GO.0019901
GO.0022411	NS	GO.0022411	GO.0022411
GO.0022607	NS	NS	GO.0022607
GO.0022626	NS	NS	GO.0022626
GO.0030554	GO.0030554	NS	GO.0030554
GO.0031625	GO.0031625	NS	GO.0031625
GO.0031974	NS	NS	GO.0031974
GO.0032550	GO.0032550	NS	GO.0032550
GO.0032553	GO.0032553	NS	GO.0032553
GO.0032555	GO.0032555	NS	GO.0032555
GO.0032774	GO.0032774	NS	GO.0032774
GO.0034248	NS	NS	GO.0034248
GO.0034622	NS	NS	GO.0034622
GO.0034645	NS	NS	GO.0034645
GO.0034654	GO.0034654	NS	GO.0034654
GO.0034655	NS	NS	GO.0034655
GO.0035639	GO.0035639	NS	GO.0035639
GO.0036094	GO.0036094	NS	GO.0036094
GO.0042981	NS	NS	GO.0042981
GO.0043065	NS	NS	GO.0043065
GO.0043066	GO.0043066	NS	GO.0043066
GO.0043226	NS	NS	GO.0043226
GO.0043227	GO.0043227	NS	GO.0043227
GO.0043229	NS	NS	GO.0043229
GO.0043231	NS	NS	GO.0043231
GO.0043233	NS	NS	GO.0043233
GO.0044085	NS	NS	GO.0044085
GO.0044237	NS	NS	GO.0044237
GO.0044238	NS	NS	GO.0044238
GO.0044248	NS	NS	GO.0044248
GO.0044249	NS	NS	GO.0044249
GO.0044260	NS	NS	GO.0044260
GO.0044265	NS	NS	GO.0044265
GO.0044267	NS	NS	GO.0044267
GO.0044271	GO.0044271	NS	GO.0044271
GO.0044391	NS	NS	GO.0044297
GO.0044422	NS	NS	GO.0044422
GO.0044424	NS	NS	GO.0044424
GO.0044444	NS	NS	GO.0044444
GO.0044446	NS	NS	GO.0044446
GO.0044451	GO.0044451	NS	GO.0044451
GO.0044454	NS	NS	GO.0044454
GO.0044802	GO.0044802	NS	GO.0044802
GO.0045184	NS	NS	GO.0045184
GO.0046907	GO.0046907	NS	GO.0046907
GO.0051084	NS	NS	GO.0051084
GO.0051704	GO.0051704	NS	GO.0051704
GO.0060255	NS	NS	GO.0060255
GO.0060548	GO.0060548	NS	GO.0060548
GO.0061024	NS	GO.0061024	GO.0061024
GO.0065003	NS	NS	GO.0065003
GO.0070013	NS	NS	GO.0070013
GO.0071013	NS	NS	GO.0071013
GO.0071702	GO.0071702	NS	GO.0071702
GO.0071704	NS	NS	GO.0071704
GO.0071705	GO.0071705	NS	GO.0071705
GO.0071822	NS	NS	GO.0071822
GO.0071840	NS	NS	GO.0071840
GO.0072594	NS	NS	GO.0072594
GO.0080090	NS	NS	GO.0080090
GO.0080135	GO.0080135	NS	GO.0080135
GO.0090304	GO.0090304	NS	GO.0090304
GO.0097367	GO.0097367	NS	GO.0097367
GO.1901362	GO.1901362	NS	GO.1901362
GO.1901566	NS	NS	GO.1901566
GO.1901575	NS	NS	GO.1901575
GO.1901576	NS	NS	GO.1901576
GO.1902580	NS	NS	GO.1902580
GO.1902582	NS	GO.1902582	GO.1902582

## Sheet: Density_H12
Df	Dn	Dc	D
GO.0000785	GO.0000785	GO.0000785	GO.0000785
GO.0000956	GO.0000956	NS	GO.0000956
GO.0003674	NS	GO.0003674	GO.0003674
GO.0003676	GO.0003676	NS	GO.0003676
GO.0003677	GO.0003677	GO.0003677	GO.0003677
GO.0005488	NS	GO.0005488	GO.0005488
GO.0005515	GO.0005515	NS	GO.0005515
GO.0005576	GO.0005576	GO.0005576	GO.0005576
GO.0005634	NS	GO.0005634	GO.0005634
GO.0005654	NS	GO.0005654	GO.0005654
GO.0005694	GO.0005694	GO.0005694	GO.0005694
GO.0005739	NS	NS	GO.0005739
GO.0005740	GO.0005740	GO.0005740	GO.0005740
GO.0005743	NS	GO.0005743	GO.0005743
GO.0005759	NS	NS	GO.0005759
GO.0005856	NS	GO.0005856	GO.0005856
GO.0005912	GO.0005912	NS	GO.0005912
GO.0005925	GO.0005925	NS	GO.0005925
GO.0006401	NS	GO.0006401	GO.0006401
GO.0006402	NS	GO.0006402	GO.0006402
GO.0006996	GO.0006996	GO.0006996	GO.0006996
GO.0008152	GO.0008152	NS	GO.0008152
GO.0009987	NS	GO.0009987	GO.0009987
GO.0017076	NS	GO.0017076	GO.0017076
GO.0019058	NS	GO.0019058	GO.0019058
GO.0019866	GO.0019866	GO.0019866	GO.0019866
GO.0019899	GO.0019899	GO.0019899	GO.0019899
GO.0022607	NS	NS	GO.0022607
GO.0030054	NS	NS	GO.0030054
GO.0030554	GO.0030554	GO.0030554	GO.0030554
GO.0031966	NS	GO.0031966	GO.0031966
GO.0031981	NS	GO.0031981	GO.0031981
GO.0031982	GO.0031982	GO.0031982	GO.0031982
GO.0031988	GO.0031988	GO.0031988	GO.0031988
GO.0032550	GO.0032550	GO.0032550	GO.0032550
GO.0032553	GO.0032553	GO.0032553	GO.0032553
GO.0032555	GO.0032555	GO.0032555	GO.0032555
GO.0032991	GO.0032991	GO.0032991	GO.0032991
GO.0035639	GO.0035639	GO.0035639	GO.0035639
GO.0043065	GO.0043065	GO.0043065	GO.0043065
GO.0043066	NS	NS	GO.0043066
GO.0043209	NS	NS	GO.0043209
GO.0043231	GO.0043231	GO.0043231	GO.0043231
GO.0043232	NS	NS	GO.0043232
GO.0043566	GO.0043566	GO.0043566	GO.0043566
GO.0044237	NS	NS	GO.0044237
GO.0044238	GO.0044238	NS	GO.0044238
GO.0044260	GO.0044260	NS	GO.0044260
GO.0044265	NS	GO.0044265	GO.0044265
GO.0044421	GO.0044421	GO.0044421	GO.0044421
GO.0044422	GO.0044422	NS	GO.0044422
GO.0044427	GO.0044427	GO.0044427	GO.0044427
GO.0044428	NS	GO.0044428	GO.0044428
GO.0044430	NS	GO.0044430	GO.0044430
GO.0044444	GO.0044444	GO.0044444	GO.0044444
GO.0044446	GO.0044446	GO.0044446	GO.0044446
GO.0044712	GO.0044712	NS	GO.0044712
GO.0044765	NS	GO.0044765	GO.0044765
GO.0060548	NS	NS	GO.0060548
GO.0070062	GO.0070062	GO.0070062	GO.0070062
GO.0071013	NS	NS	GO.0071013
GO.0071704	GO.0071704	NS	GO.0071704
GO.0071840	GO.0071840	NS	GO.0071840
GO.0080090	GO.0080090	NS	GO.0080090
GO.0097159	GO.0097159	NS	GO.0097159
GO.1901363	GO.1901363	NS	GO.1901363
GO.1901575	NS	NS	GO.1901575

## Sheet: Ratio_H04
Rf	Rn	Rc
GO.0008104	NS	NS
GO.0034613	NS	NS
GO.0070972	NS	NS

## Sheet: Ratio_H12
Rf	Rn	Rc
GO.0003676	GO.0000375	GO.0000375
GO.0003723	NS	GO.0003723
GO.0005615	NS	GO.0005615
GO.0009058	NS	GO.0009058
GO.0010467	NS	GO.0010467
GO.0016032	NS	NS
GO.0043933	NS	GO.0043933
GO.0044822	NS	NS
GO.0051084	NS	GO.0051084
GO.0051704	NS	GO.0051704
GO.0071822	NS	NS
GO.0090304	GO.0072524	GO.0072524
GO.1901576	GO.1901575	GO.1901575

## Sheet: Node_number_H12
Nf	Nn	N
GO.0005759	NS	GO.0005759
GO.0016604	NS	GO.0016604
GO.0044451	NS	GO.0044451
GO.0044712	NS	GO.0044712
GO.0071705	NS	GO.0071705

## Sheet: explanation
Rf	edge ratio in the functional sub-network
Rc	cross edge ratio
Rn	edge ratio in the non-functional sub-network
Nf	number of nodes in the non-functional sub-network
Nn	number of nodes in the functional sub-network
N	number of nodes in the whole network
Df	edge-weight density in the functional sub-network
Dc	cross edge-weight density
Dn	edge-weight density in the non functional sub-network
D	edge-weight density in the whole network
NS	non significant difference
